# Supplementary material for: RNA structure drives interaction with proteins
Source: Springer Nature journal article supplement (doi:10.1038/s41467-019-10923-5), 2019-07-19
Supplement: MOESM4 [file 41467_2019_10923_MOESM4_ESM.pdf]

## Description of Additional Supplementary Files

File Name: Supplementary Data 1

Description: List of protein and transcript pairs analysed with RPISeq and *cat*RAPID (linked to Supplementary Figure 1).

File Name: Supplementary Data 2

Description: List of RNA protein chain pairs (linked to Figure 1): PDB ID, RNA chain, protein chain, internal contacts (from Equation (2) of Methods) and external contacts (from Equation (3) of Methods) as well as PDB title

File Name: Supplementary Data 3

Description: List of Structural content (PARS) and number of protein binders (eCLIP) for both the HS and LS RNA sets.

File Name: Supplementary Data 4

Description: UniProt entries for exclusively single-stranded (ssRNA) and double-stranded RNA (dsRNA) binders.

File Name: Supplementary Data 5

Description: Protein enrichments in the b-isox aggregate: Protein ID, protein name, gene name, statistical significance (Student's test) and enrichment over the background for both *Hsp70* and *BRaf*.
