# Supplementary material for: RNA structure drives interaction with proteins
Source: Nat Commun. 2019 Jul 19;10:3246. doi: 10.1038/s41467-019-10923-5 (PMC6642211; doi:10.1038/s41467-019-10923-5)
Supplement: Supplementary file 5 — Supplementary Data 1 [file 41467_2019_10923_MOESM5_ESM.xlsx]

## Sheet: RPISeq
Protein ID	Transcript ID	RPISeqRF	RPISeqSVM	catRAPID z-score
sp|A0AV96|RBM47_HUMAN	ENST00000361739	0.85	0.963	-0.71
sp|A1L020|MEX3A_HUMAN	ENST00000361739	0.8	0.976	-0.81
sp|A6NC42|DPPA5_HUMAN	ENST00000361739	0.75	0.863	0.1
sp|A6NDE4|RBY1B_HUMAN	ENST00000361739	0.8	0.98	0.2
sp|A6NDY0|EPAB2_HUMAN	ENST00000361739	0.75	0.94	0.21
sp|A6NFN3|RFOX3_HUMAN	ENST00000361739	0.75	0.975	-0.55
sp|A6NGQ2|OOEP_HUMAN	ENST00000361739	0.8	0.945	0.28
sp|A6NHQ2|FBLL1_HUMAN	ENST00000361739	0.9	0.963	-1.04
sp|A6NMK7|CPS4L_HUMAN	ENST00000361739	0.85	0.921	0.05
sp|A6NMX2|I4E1B_HUMAN	ENST00000361739	0.65	0.972	0.37
sp|A7MD48|SRRM4_HUMAN	ENST00000361739	0.85	0.983	-0.1
sp|A8MWD9|RUXGL_HUMAN	ENST00000361739	0.85	0.992	0.26
sp|A9UHW6|MI4GD_HUMAN	ENST00000361739	0.95	0.955	0.19
sp|C9JE40|PATL2_HUMAN	ENST00000361739	0.75	0.982	-0.78
sp|O00257|CBX4_HUMAN	ENST00000361739	0.8	0.982	-0.64
sp|O00425|IF2B3_HUMAN	ENST00000361739	0.65	0.982	-0.12
sp|O00442|RTCA_HUMAN	ENST00000361739	0.8	0.989	0.49
sp|O00571|DDX3X_HUMAN	ENST00000361739	0.8	0.979	0.14
sp|O00584|RNT2_HUMAN	ENST00000361739	0.8	0.947	0.07
sp|O14717|TRDMT_HUMAN	ENST00000361739	0.8	0.985	0.55
sp|O14979|HNRDL_HUMAN	ENST00000361739	0.7	0.987	-0.44
sp|O15116|LSM1_HUMAN	ENST00000361739	0.75	0.952	-0.2
sp|O15226|NKRF_HUMAN	ENST00000361739	0.8	0.984	-0.78
sp|O15234|CASC3_HUMAN	ENST00000361739	0.8	0.99	-0.64
sp|O43148|MCES_HUMAN	ENST00000361739	0.7	0.986	0.39
sp|O43251|RFOX2_HUMAN	ENST00000361739	0.85	0.976	0.36
sp|O43310|CTIF_HUMAN	ENST00000361739	0.75	0.987	-0.44
sp|O43347|MSI1H_HUMAN	ENST00000361739	0.8	0.971	0.19
sp|O43390|HNRPR_HUMAN	ENST00000361739	0.8	0.99	0.19
sp|O43809|CPSF5_HUMAN	ENST00000361739	0.75	0.952	-0.22
sp|O43818|U3IP2_HUMAN	ENST00000361739	0.8	0.976	0
sp|O60381|HBP1_HUMAN	ENST00000361739	0.75	0.986	-0.3
sp|O60506|HNRPQ_HUMAN	ENST00000361739	0.75	0.986	0.04
sp|O60573|IF4E2_HUMAN	ENST00000361739	0.8	0.956	-0.01
sp|O60812|HNRCL_HUMAN	ENST00000361739	0.7	0.881	-0.29
sp|O60832|DKC1_HUMAN	ENST00000361739	0.75	0.994	-0.19
sp|O60870|KIN17_HUMAN	ENST00000361739	0.7	0.98	0.39
sp|O60930|RNH1_HUMAN	ENST00000361739	0.8	0.923	-0.25
sp|O60936|NOL3_HUMAN	ENST00000361739	0.75	0.933	0.1
sp|O75319|DUS11_HUMAN	ENST00000361739	0.8	0.968	-0.18
sp|O75494|SRS10_HUMAN	ENST00000361739	0.75	0.97	0.13
sp|O75525|KHDR3_HUMAN	ENST00000361739	0.75	0.97	-0.01
sp|O75526|RMXL2_HUMAN	ENST00000361739	0.8	0.992	0.62
sp|O75569|PRKRA_HUMAN	ENST00000361739	0.65	0.982	-0.15
sp|O75616|ERAL1_HUMAN	ENST00000361739	0.9	0.989	-0.21
sp|O75648|MTU1_HUMAN	ENST00000361739	0.75	0.982	0.12
sp|O75683|SURF6_HUMAN	ENST00000361739	0.85	0.97	0.25
sp|O75792|RNH2A_HUMAN	ENST00000361739	0.8	0.952	-0.19
sp|P51003|PAPOA_HUMAN	ENST00000361739	0.85	0.986	0.1
sp|Q86SG3|DAZ4_HUMAN	ENST00000361739	0.85	0.963	-0.38
sp|A0AV96|RBM47_HUMAN	ENST00000365328	0.75	0.209	0.42
sp|A1L020|MEX3A_HUMAN	ENST00000365328	0.8	0.241	0.39
sp|A6NC42|DPPA5_HUMAN	ENST00000365328	0.6	0.122	0.56
sp|A6NDE4|RBY1B_HUMAN	ENST00000365328	0.85	0.311	0.88
sp|A6NDY0|EPAB2_HUMAN	ENST00000365328	0.7	0.175	0.65
sp|A6NFN3|RFOX3_HUMAN	ENST00000365328	0.7	0.259	0.57
sp|A6NGQ2|OOEP_HUMAN	ENST00000365328	0.7	0.295	0.85
sp|A6NHQ2|FBLL1_HUMAN	ENST00000365328	0.8	0.274	0.26
sp|A6NMK7|CPS4L_HUMAN	ENST00000365328	0.8	0.307	0.82
sp|A6NMX2|I4E1B_HUMAN	ENST00000365328	0.7	0.209	0.22
sp|A7MD48|SRRM4_HUMAN	ENST00000365328	0.75	0.397	0.59
sp|A8MWD9|RUXGL_HUMAN	ENST00000365328	0.7	0.731	0.57
sp|A9UHW6|MI4GD_HUMAN	ENST00000365328	0.8	0.161	0.16
sp|C9JE40|PATL2_HUMAN	ENST00000365328	0.8	0.286	0.16
sp|O00257|CBX4_HUMAN	ENST00000365328	0.75	0.323	0.83
sp|O00425|IF2B3_HUMAN	ENST00000365328	0.9	0.319	0.39
sp|O00442|RTCA_HUMAN	ENST00000365328	0.75	0.542	0.74
sp|O00571|DDX3X_HUMAN	ENST00000365328	0.75	0.298	-0.36
sp|O00584|RNT2_HUMAN	ENST00000365328	0.7	0.33	-0.17
sp|O14717|TRDMT_HUMAN	ENST00000365328	0.75	0.317	0.71
sp|O14979|HNRDL_HUMAN	ENST00000365328	0.7	0.4	0.01
sp|O15116|LSM1_HUMAN	ENST00000365328	0.75	0.206	0.76
sp|O15226|NKRF_HUMAN	ENST00000365328	0.75	0.495	0.78
sp|O15234|CASC3_HUMAN	ENST00000365328	0.85	0.384	0.01
sp|O43148|MCES_HUMAN	ENST00000365328	0.85	0.483	0.31
sp|O43251|RFOX2_HUMAN	ENST00000365328	0.85	0.214	0.21
sp|O43310|CTIF_HUMAN	ENST00000365328	0.6	0.54	-0.27
sp|O43347|MSI1H_HUMAN	ENST00000365328	0.7	0.181	0.54
sp|O43390|HNRPR_HUMAN	ENST00000365328	0.75	0.524	0.66
sp|O43809|CPSF5_HUMAN	ENST00000365328	0.85	0.152	-0.11
sp|O43818|U3IP2_HUMAN	ENST00000365328	0.8	0.314	-0.07
sp|O60381|HBP1_HUMAN	ENST00000365328	0.75	0.427	0.81
sp|O60506|HNRPQ_HUMAN	ENST00000365328	0.8	0.387	0.54
sp|O60573|IF4E2_HUMAN	ENST00000365328	0.8	0.19	0.16
sp|O60812|HNRCL_HUMAN	ENST00000365328	0.6	0.121	0.18
sp|O60832|DKC1_HUMAN	ENST00000365328	0.7	0.619	0.84
sp|O60870|KIN17_HUMAN	ENST00000365328	0.7	0.338	1.08
sp|O60930|RNH1_HUMAN	ENST00000365328	0.8	0.23	0.44
sp|O60936|NOL3_HUMAN	ENST00000365328	0.8	0.202	0.42
sp|O75319|DUS11_HUMAN	ENST00000365328	0.85	0.267	0.63
sp|O75494|SRS10_HUMAN	ENST00000365328	0.65	0.324	0.01
sp|O75525|KHDR3_HUMAN	ENST00000365328	0.85	0.312	1.22
sp|O75526|RMXL2_HUMAN	ENST00000365328	0.85	0.671	0.63
sp|O75569|PRKRA_HUMAN	ENST00000365328	0.8	0.326	1.1
sp|O75616|ERAL1_HUMAN	ENST00000365328	0.8	0.369	-0.54
sp|O75648|MTU1_HUMAN	ENST00000365328	0.85	0.308	0.03
sp|O75683|SURF6_HUMAN	ENST00000365328	0.7	0.366	1.16
sp|O75792|RNH2A_HUMAN	ENST00000365328	0.8	0.185	0.16
sp|P51003|PAPOA_HUMAN	ENST00000365328	0.7	0.276	0.34
sp|Q86SG3|DAZ4_HUMAN	ENST00000365328	0.8	0.185	-0.17
sp|A0AV96|RBM47_HUMAN	ENST00000547717	0.85	0.808	-0.45
sp|A1L020|MEX3A_HUMAN	ENST00000547717	0.8	0.789	-0.38
sp|A6NC42|DPPA5_HUMAN	ENST00000547717	0.75	0.427	-0.6
sp|A6NDE4|RBY1B_HUMAN	ENST00000547717	0.75	0.84	-0.26
sp|A6NDY0|EPAB2_HUMAN	ENST00000547717	0.85	0.612	-0.47
sp|A6NFN3|RFOX3_HUMAN	ENST00000547717	0.85	0.841	-0.5
sp|A6NGQ2|OOEP_HUMAN	ENST00000547717	0.85	0.729	-0.56
sp|A6NHQ2|FBLL1_HUMAN	ENST00000547717	0.9	0.852	-0.42
sp|A6NMK7|CPS4L_HUMAN	ENST00000547717	0.85	0.702	-0.57
sp|A6NMX2|I4E1B_HUMAN	ENST00000547717	0.65	0.725	-0.41
sp|A7MD48|SRRM4_HUMAN	ENST00000547717	0.85	0.923	-0.4
sp|A8MWD9|RUXGL_HUMAN	ENST00000547717	0.85	0.972	-0.5
sp|A9UHW6|MI4GD_HUMAN	ENST00000547717	0.85	0.63	-0.51
sp|C9JE40|PATL2_HUMAN	ENST00000547717	0.75	0.807	-0.06
sp|O00257|CBX4_HUMAN	ENST00000547717	0.85	0.88	-0.43
sp|O00425|IF2B3_HUMAN	ENST00000547717	0.8	0.834	-0.35
sp|O00442|RTCA_HUMAN	ENST00000547717	0.75	0.905	-0.47
sp|O00571|DDX3X_HUMAN	ENST00000547717	0.65	0.806	-0.17
sp|O00584|RNT2_HUMAN	ENST00000547717	0.75	0.677	-0.42
sp|O14717|TRDMT_HUMAN	ENST00000547717	0.75	0.86	-0.43
sp|O14979|HNRDL_HUMAN	ENST00000547717	0.85	0.904	-0.51
sp|O15116|LSM1_HUMAN	ENST00000547717	0.8	0.64	-0.56
sp|O15226|NKRF_HUMAN	ENST00000547717	0.55	0.855	-0.12
sp|O15234|CASC3_HUMAN	ENST00000547717	0.75	0.897	-0.47
sp|O43148|MCES_HUMAN	ENST00000547717	0.55	0.891	-0.5
sp|O43251|RFOX2_HUMAN	ENST00000547717	0.85	0.836	-0.43
sp|O43310|CTIF_HUMAN	ENST00000547717	0.65	0.883	-0.47
sp|O43347|MSI1H_HUMAN	ENST00000547717	0.75	0.718	-0.48
sp|O43390|HNRPR_HUMAN	ENST00000547717	0.7	0.921	-0.35
sp|O43809|CPSF5_HUMAN	ENST00000547717	0.7	0.569	-0.5
sp|O43818|U3IP2_HUMAN	ENST00000547717	0.85	0.863	-0.53
sp|O60381|HBP1_HUMAN	ENST00000547717	0.65	0.85	-0.28
sp|O60506|HNRPQ_HUMAN	ENST00000547717	0.8	0.884	-0.32
sp|O60573|IF4E2_HUMAN	ENST00000547717	0.7	0.586	-0.4
sp|O60812|HNRCL_HUMAN	ENST00000547717	0.85	0.45	-0.31
sp|O60832|DKC1_HUMAN	ENST00000547717	0.7	0.939	-0.25
sp|O60870|KIN17_HUMAN	ENST00000547717	0.8	0.8	-0.42
sp|O60930|RNH1_HUMAN	ENST00000547717	0.85	0.645	-0.26
sp|O60936|NOL3_HUMAN	ENST00000547717	0.85	0.735	-0.55
sp|O75319|DUS11_HUMAN	ENST00000547717	0.7	0.738	-0.49
sp|O75494|SRS10_HUMAN	ENST00000547717	0.8	0.888	-0.44
sp|O75525|KHDR3_HUMAN	ENST00000547717	0.7	0.775	-0.47
sp|O75526|RMXL2_HUMAN	ENST00000547717	0.75	0.948	-0.34
sp|O75569|PRKRA_HUMAN	ENST00000547717	0.6	0.798	-0.42
sp|O75616|ERAL1_HUMAN	ENST00000547717	0.75	0.848	-0.33
sp|O75648|MTU1_HUMAN	ENST00000547717	0.8	0.802	-0.38
sp|O75683|SURF6_HUMAN	ENST00000547717	0.95	0.874	-0.49
sp|O75792|RNH2A_HUMAN	ENST00000547717	0.75	0.683	-0.35
sp|P51003|PAPOA_HUMAN	ENST00000547717	0.95	0.83	0.17
sp|Q86SG3|DAZ4_HUMAN	ENST00000547717	0.9	0.739	-0.46
sp|A0AV96|RBM47_HUMAN	ENST00000548861	0.85	0.641	-0.73
sp|A1L020|MEX3A_HUMAN	ENST00000548861	0.8	0.656	-0.67
sp|A6NC42|DPPA5_HUMAN	ENST00000548861	0.75	0.228	0.21
sp|A6NDE4|RBY1B_HUMAN	ENST00000548861	0.7	0.767	-0.1
sp|A6NDY0|EPAB2_HUMAN	ENST00000548861	0.85	0.401	-0.54
sp|A6NFN3|RFOX3_HUMAN	ENST00000548861	0.75	0.667	-0.64
sp|A6NGQ2|OOEP_HUMAN	ENST00000548861	0.95	0.429	0.38
sp|A6NHQ2|FBLL1_HUMAN	ENST00000548861	0.65	0.699	-1.26
sp|A6NMK7|CPS4L_HUMAN	ENST00000548861	0.8	0.522	-0.2
sp|A6NMX2|I4E1B_HUMAN	ENST00000548861	0.65	0.542	-1.09
sp|A7MD48|SRRM4_HUMAN	ENST00000548861	0.75	0.847	0.09
sp|A8MWD9|RUXGL_HUMAN	ENST00000548861	0.8	0.913	-0.08
sp|A9UHW6|MI4GD_HUMAN	ENST00000548861	0.75	0.398	-0.83
sp|C9JE40|PATL2_HUMAN	ENST00000548861	0.8	0.605	-0.45
sp|O00257|CBX4_HUMAN	ENST00000548861	0.95	0.719	-0.01
sp|O00425|IF2B3_HUMAN	ENST00000548861	0.8	0.694	-0.01
sp|O00442|RTCA_HUMAN	ENST00000548861	0.55	0.822	-0.14
sp|O00571|DDX3X_HUMAN	ENST00000548861	0.65	0.685	-0.52
sp|O00584|RNT2_HUMAN	ENST00000548861	0.75	0.508	-1.37
sp|O14717|TRDMT_HUMAN	ENST00000548861	0.8	0.625	-0.34
sp|O14979|HNRDL_HUMAN	ENST00000548861	0.8	0.812	-1.03
sp|O15116|LSM1_HUMAN	ENST00000548861	0.85	0.457	0.38
sp|O15226|NKRF_HUMAN	ENST00000548861	0.7	0.793	-0.04
sp|O15234|CASC3_HUMAN	ENST00000548861	0.75	0.771	0.14
sp|O43148|MCES_HUMAN	ENST00000548861	0.6	0.799	-0.2
sp|O43251|RFOX2_HUMAN	ENST00000548861	0.8	0.672	-0.7
sp|O43310|CTIF_HUMAN	ENST00000548861	0.75	0.778	-0.07
sp|O43347|MSI1H_HUMAN	ENST00000548861	0.85	0.548	-0.63
sp|O43390|HNRPR_HUMAN	ENST00000548861	0.7	0.847	0.1
sp|O43809|CPSF5_HUMAN	ENST00000548861	0.7	0.353	-0.74
sp|O43818|U3IP2_HUMAN	ENST00000548861	0.7	0.748	-0.26
sp|O60381|HBP1_HUMAN	ENST00000548861	0.65	0.775	-0.22
sp|O60506|HNRPQ_HUMAN	ENST00000548861	0.75	0.789	0.11
sp|O60573|IF4E2_HUMAN	ENST00000548861	0.75	0.459	-1.26
sp|O60812|HNRCL_HUMAN	ENST00000548861	0.65	0.314	-1.1
sp|O60832|DKC1_HUMAN	ENST00000548861	0.65	0.893	0.12
sp|O60870|KIN17_HUMAN	ENST00000548861	0.75	0.699	-0.33
sp|O60930|RNH1_HUMAN	ENST00000548861	0.75	0.526	-0.99
sp|O60936|NOL3_HUMAN	ENST00000548861	0.6	0.462	-0.4
sp|O75319|DUS11_HUMAN	ENST00000548861	0.65	0.599	-0.47
sp|O75494|SRS10_HUMAN	ENST00000548861	0.65	0.745	-0.93
sp|O75525|KHDR3_HUMAN	ENST00000548861	0.7	0.646	-0.38
sp|O75526|RMXL2_HUMAN	ENST00000548861	0.75	0.899	-0.45
sp|O75569|PRKRA_HUMAN	ENST00000548861	0.55	0.665	-0.8
sp|O75616|ERAL1_HUMAN	ENST00000548861	0.7	0.741	-0.99
sp|O75648|MTU1_HUMAN	ENST00000548861	0.85	0.716	-1.12
sp|O75683|SURF6_HUMAN	ENST00000548861	0.85	0.77	-0.31
sp|O75792|RNH2A_HUMAN	ENST00000548861	0.75	0.525	-1.25
sp|P51003|PAPOA_HUMAN	ENST00000548861	0.7	0.652	-0.48
sp|Q86SG3|DAZ4_HUMAN	ENST00000548861	0.65	0.582	-0.64
sp|A0AV96|RBM47_HUMAN	ENST00000567078	0.85	0.661	0.9
sp|A1L020|MEX3A_HUMAN	ENST00000567078	0.75	0.674	0.42
sp|A6NC42|DPPA5_HUMAN	ENST00000567078	0.7	0.462	0.27
sp|A6NDE4|RBY1B_HUMAN	ENST00000567078	0.65	0.782	0.41
sp|A6NDY0|EPAB2_HUMAN	ENST00000567078	0.75	0.605	1.15
sp|A6NFN3|RFOX3_HUMAN	ENST00000567078	0.8	0.728	1.34
sp|A6NGQ2|OOEP_HUMAN	ENST00000567078	0.75	0.65	0.38
sp|A6NHQ2|FBLL1_HUMAN	ENST00000567078	0.85	0.688	1.36
sp|A6NMK7|CPS4L_HUMAN	ENST00000567078	0.85	0.684	0.93
sp|A6NMX2|I4E1B_HUMAN	ENST00000567078	0.7	0.666	1.27
sp|A7MD48|SRRM4_HUMAN	ENST00000567078	0.8	0.829	-0.35
sp|A8MWD9|RUXGL_HUMAN	ENST00000567078	0.8	0.949	-0.17
sp|A9UHW6|MI4GD_HUMAN	ENST00000567078	0.85	0.565	0.88
sp|C9JE40|PATL2_HUMAN	ENST00000567078	0.85	0.748	-1.15
sp|O00257|CBX4_HUMAN	ENST00000567078	0.85	0.764	0.51
sp|O00425|IF2B3_HUMAN	ENST00000567078	0.85	0.788	-0.52
sp|O00442|RTCA_HUMAN	ENST00000567078	0.85	0.855	0.7
sp|O00571|DDX3X_HUMAN	ENST00000567078	0.75	0.75	-1.55
sp|O00584|RNT2_HUMAN	ENST00000567078	0.85	0.684	0.88
sp|O14717|TRDMT_HUMAN	ENST00000567078	0.75	0.774	-0.14
sp|O14979|HNRDL_HUMAN	ENST00000567078	0.8	0.821	0.03
sp|O15116|LSM1_HUMAN	ENST00000567078	0.75	0.601	0.79
sp|O15226|NKRF_HUMAN	ENST00000567078	0.65	0.847	0.07
sp|O15234|CASC3_HUMAN	ENST00000567078	0.75	0.814	-0.62
sp|O43148|MCES_HUMAN	ENST00000567078	0.6	0.853	-0.89
sp|O43251|RFOX2_HUMAN	ENST00000567078	0.75	0.711	-0.02
sp|O43310|CTIF_HUMAN	ENST00000567078	0.75	0.857	-1.26
sp|O43347|MSI1H_HUMAN	ENST00000567078	0.75	0.64	0.58
sp|O43390|HNRPR_HUMAN	ENST00000567078	0.7	0.851	-0.75
sp|O43809|CPSF5_HUMAN	ENST00000567078	0.75	0.543	0.48
sp|O43818|U3IP2_HUMAN	ENST00000567078	0.95	0.758	-1.01
sp|O60381|HBP1_HUMAN	ENST00000567078	0.65	0.842	0.39
sp|O60506|HNRPQ_HUMAN	ENST00000567078	0.8	0.785	-1.1
sp|O60573|IF4E2_HUMAN	ENST00000567078	0.75	0.572	1.42
sp|O60812|HNRCL_HUMAN	ENST00000567078	0.8	0.397	1.65
sp|O60832|DKC1_HUMAN	ENST00000567078	0.8	0.897	0.03
sp|O60870|KIN17_HUMAN	ENST00000567078	0.75	0.796	0.58
sp|O60930|RNH1_HUMAN	ENST00000567078	0.8	0.64	1.67
sp|O60936|NOL3_HUMAN	ENST00000567078	0.8	0.584	0.67
sp|O75319|DUS11_HUMAN	ENST00000567078	0.75	0.733	1.11
sp|O75494|SRS10_HUMAN	ENST00000567078	0.75	0.736	0.38
sp|O75525|KHDR3_HUMAN	ENST00000567078	0.7	0.775	1.68
sp|O75526|RMXL2_HUMAN	ENST00000567078	0.75	0.883	0.28
sp|O75569|PRKRA_HUMAN	ENST00000567078	0.8	0.795	1.82
sp|O75616|ERAL1_HUMAN	ENST00000567078	0.7	0.804	-1.57
sp|O75648|MTU1_HUMAN	ENST00000567078	0.8	0.771	0.01
sp|O75683|SURF6_HUMAN	ENST00000567078	0.85	0.775	1.08
sp|O75792|RNH2A_HUMAN	ENST00000567078	0.65	0.666	0.93
sp|P51003|PAPOA_HUMAN	ENST00000567078	0.95	0.771	-1.08
sp|Q86SG3|DAZ4_HUMAN	ENST00000567078	0.85	0.662	-0.72
sp|A0AV96|RBM47_HUMAN	NM_000146	0.7	0.356	0.51
sp|A1L020|MEX3A_HUMAN	NM_000146	0.75	0.419	-0.69
sp|A6NC42|DPPA5_HUMAN	NM_000146	0.7	0.169	1.43
sp|A6NDE4|RBY1B_HUMAN	NM_000146	0.7	0.514	-0.58
sp|A6NDY0|EPAB2_HUMAN	NM_000146	0.75	0.256	-0.05
sp|A6NFN3|RFOX3_HUMAN	NM_000146	0.85	0.43	-0.98
sp|A6NGQ2|OOEP_HUMAN	NM_000146	0.8	0.387	0.55
sp|A6NHQ2|FBLL1_HUMAN	NM_000146	0.8	0.475	-1.62
sp|A6NMK7|CPS4L_HUMAN	NM_000146	0.95	0.434	0.5
sp|A6NMX2|I4E1B_HUMAN	NM_000146	0.65	0.308	0.01
sp|A7MD48|SRRM4_HUMAN	NM_000146	0.75	0.721	0.78
sp|A8MWD9|RUXGL_HUMAN	NM_000146	0.8	0.903	0.76
sp|A9UHW6|MI4GD_HUMAN	NM_000146	0.8	0.229	-0.52
sp|C9JE40|PATL2_HUMAN	NM_000146	0.65	0.509	-0.27
sp|O00257|CBX4_HUMAN	NM_000146	0.75	0.548	1.91
sp|O00425|IF2B3_HUMAN	NM_000146	0.8	0.511	1.63
sp|O00442|RTCA_HUMAN	NM_000146	0.8	0.752	0.12
sp|O00571|DDX3X_HUMAN	NM_000146	0.75	0.484	0.24
sp|O00584|RNT2_HUMAN	NM_000146	0.8	0.427	-1.36
sp|O14717|TRDMT_HUMAN	NM_000146	0.85	0.595	-0.49
sp|O14979|HNRDL_HUMAN	NM_000146	0.65	0.672	-1.87
sp|O15116|LSM1_HUMAN	NM_000146	0.85	0.328	1.14
sp|O15226|NKRF_HUMAN	NM_000146	0.75	0.675	0.62
sp|O15234|CASC3_HUMAN	NM_000146	0.75	0.663	0.53
sp|O43148|MCES_HUMAN	NM_000146	0.6	0.668	-0.86
sp|O43251|RFOX2_HUMAN	NM_000146	0.9	0.357	-0.54
sp|O43310|CTIF_HUMAN	NM_000146	0.65	0.699	1.01
sp|O43347|MSI1H_HUMAN	NM_000146	0.7	0.304	-1.17
sp|O43390|HNRPR_HUMAN	NM_000146	0.75	0.764	-0.61
sp|O43809|CPSF5_HUMAN	NM_000146	0.7	0.228	-1.15
sp|O43818|U3IP2_HUMAN	NM_000146	0.75	0.563	-0.95
sp|O60381|HBP1_HUMAN	NM_000146	0.65	0.615	-0.23
sp|O60506|HNRPQ_HUMAN	NM_000146	0.75	0.622	-0.91
sp|O60573|IF4E2_HUMAN	NM_000146	0.8	0.272	-0.72
sp|O60812|HNRCL_HUMAN	NM_000146	0.65	0.147	-1.45
sp|O60832|DKC1_HUMAN	NM_000146	0.7	0.838	0.81
sp|O60870|KIN17_HUMAN	NM_000146	0.85	0.592	0.05
sp|O60930|RNH1_HUMAN	NM_000146	0.85	0.327	-0.78
sp|O60936|NOL3_HUMAN	NM_000146	0.75	0.363	0.23
sp|O75319|DUS11_HUMAN	NM_000146	0.7	0.481	-1
sp|O75494|SRS10_HUMAN	NM_000146	0.7	0.609	-0.69
sp|O75525|KHDR3_HUMAN	NM_000146	0.7	0.424	0.21
sp|O75526|RMXL2_HUMAN	NM_000146	0.8	0.857	-0.23
sp|O75569|PRKRA_HUMAN	NM_000146	0.75	0.505	-1.08
sp|O75616|ERAL1_HUMAN	NM_000146	0.85	0.59	-1.75
sp|O75648|MTU1_HUMAN	NM_000146	0.8	0.515	-1
sp|O75683|SURF6_HUMAN	NM_000146	0.75	0.648	-0.39
sp|O75792|RNH2A_HUMAN	NM_000146	0.65	0.262	-1.99
sp|P51003|PAPOA_HUMAN	NM_000146	0.75	0.547	-0.22
sp|Q86SG3|DAZ4_HUMAN	NM_000146	0.85	0.319	0.22
sp|A0AV96|RBM47_HUMAN	NM_000365	0.75	0.517	-0.81
sp|A1L020|MEX3A_HUMAN	NM_000365	0.85	0.539	-0.73
sp|A6NC42|DPPA5_HUMAN	NM_000365	0.8	0.214	-0.29
sp|A6NDE4|RBY1B_HUMAN	NM_000365	0.7	0.62	-0.76
sp|A6NDY0|EPAB2_HUMAN	NM_000365	0.75	0.357	-0.29
sp|A6NFN3|RFOX3_HUMAN	NM_000365	0.65	0.543	-0.67
sp|A6NGQ2|OOEP_HUMAN	NM_000365	0.8	0.482	-0.05
sp|A6NHQ2|FBLL1_HUMAN	NM_000365	0.85	0.602	-0.89
sp|A6NMK7|CPS4L_HUMAN	NM_000365	0.85	0.518	-0.33
sp|A6NMX2|I4E1B_HUMAN	NM_000365	0.8	0.417	-0.2
sp|A7MD48|SRRM4_HUMAN	NM_000365	0.75	0.75	-0.43
sp|A8MWD9|RUXGL_HUMAN	NM_000365	0.85	0.936	-0.44
sp|A9UHW6|MI4GD_HUMAN	NM_000365	0.85	0.302	-0.45
sp|C9JE40|PATL2_HUMAN	NM_000365	0.8	0.562	-0.4
sp|O00257|CBX4_HUMAN	NM_000365	0.75	0.667	-0.6
sp|O00425|IF2B3_HUMAN	NM_000365	0.8	0.661	-0.31
sp|O00442|RTCA_HUMAN	NM_000365	0.8	0.798	-0.68
sp|O00571|DDX3X_HUMAN	NM_000365	0.75	0.586	-0.45
sp|O00584|RNT2_HUMAN	NM_000365	0.8	0.498	-0.08
sp|O14717|TRDMT_HUMAN	NM_000365	0.85	0.634	-0.37
sp|O14979|HNRDL_HUMAN	NM_000365	0.8	0.767	-0.67
sp|O15116|LSM1_HUMAN	NM_000365	0.85	0.382	-0.18
sp|O15226|NKRF_HUMAN	NM_000365	0.7	0.727	-1.8
sp|O15234|CASC3_HUMAN	NM_000365	0.8	0.725	-0.77
sp|O43148|MCES_HUMAN	NM_000365	0.75	0.741	-0.27
sp|O43251|RFOX2_HUMAN	NM_000365	0.7	0.499	-0.5
sp|O43310|CTIF_HUMAN	NM_000365	0.7	0.735	-0.27
sp|O43347|MSI1H_HUMAN	NM_000365	0.8	0.389	-0.6
sp|O43390|HNRPR_HUMAN	NM_000365	0.75	0.823	-0.89
sp|O43809|CPSF5_HUMAN	NM_000365	0.8	0.302	-0.44
sp|O43818|U3IP2_HUMAN	NM_000365	0.85	0.686	-0.55
sp|O60381|HBP1_HUMAN	NM_000365	0.75	0.647	-0.77
sp|O60506|HNRPQ_HUMAN	NM_000365	0.75	0.723	-0.76
sp|O60573|IF4E2_HUMAN	NM_000365	0.85	0.339	-0.24
sp|O60812|HNRCL_HUMAN	NM_000365	0.65	0.206	-0.64
sp|O60832|DKC1_HUMAN	NM_000365	0.85	0.873	-0.45
sp|O60870|KIN17_HUMAN	NM_000365	0.75	0.663	-0.5
sp|O60930|RNH1_HUMAN	NM_000365	0.75	0.441	-0.34
sp|O60936|NOL3_HUMAN	NM_000365	0.8	0.424	-0.44
sp|O75319|DUS11_HUMAN	NM_000365	0.7	0.554	-0.8
sp|O75494|SRS10_HUMAN	NM_000365	0.7	0.643	-0.25
sp|O75525|KHDR3_HUMAN	NM_000365	0.7	0.581	-0.71
sp|O75526|RMXL2_HUMAN	NM_000365	0.8	0.9	-0.68
sp|O75569|PRKRA_HUMAN	NM_000365	0.8	0.584	-0.61
sp|O75616|ERAL1_HUMAN	NM_000365	0.6	0.671	-0.3
sp|O75648|MTU1_HUMAN	NM_000365	0.75	0.615	-0.52
sp|O75683|SURF6_HUMAN	NM_000365	0.9	0.71	-0.51
sp|O75792|RNH2A_HUMAN	NM_000365	0.7	0.396	-0.23
sp|P51003|PAPOA_HUMAN	NM_000365	0.75	0.599	-1.02
sp|Q86SG3|DAZ4_HUMAN	NM_000365	0.85	0.375	-0.39
sp|A0AV96|RBM47_HUMAN	NM_000969	0.85	0.961	1.62
sp|A1L020|MEX3A_HUMAN	NM_000969	0.85	0.967	1.18
sp|A6NC42|DPPA5_HUMAN	NM_000969	0.85	0.743	0.08
sp|A6NDE4|RBY1B_HUMAN	NM_000969	0.75	0.966	1.34
sp|A6NDY0|EPAB2_HUMAN	NM_000969	0.85	0.864	1.18
sp|A6NFN3|RFOX3_HUMAN	NM_000969	0.75	0.963	1.41
sp|A6NGQ2|OOEP_HUMAN	NM_000969	0.85	0.871	0.91
sp|A6NHQ2|FBLL1_HUMAN	NM_000969	0.8	0.963	0.73
sp|A6NMK7|CPS4L_HUMAN	NM_000969	0.85	0.875	1.23
sp|A6NMX2|I4E1B_HUMAN	NM_000969	0.7	0.937	0.99
sp|A7MD48|SRRM4_HUMAN	NM_000969	0.65	0.982	1.16
sp|A8MWD9|RUXGL_HUMAN	NM_000969	0.95	0.989	-0.66
sp|A9UHW6|MI4GD_HUMAN	NM_000969	0.9	0.886	1.19
sp|C9JE40|PATL2_HUMAN	NM_000969	0.8	0.955	-0.07
sp|O00257|CBX4_HUMAN	NM_000969	0.75	0.978	1.41
sp|O00425|IF2B3_HUMAN	NM_000969	0.8	0.967	1.71
sp|O00442|RTCA_HUMAN	NM_000969	0.85	0.981	1.47
sp|O00571|DDX3X_HUMAN	NM_000969	0.8	0.962	0.84
sp|O00584|RNT2_HUMAN	NM_000969	0.85	0.884	0.7
sp|O14717|TRDMT_HUMAN	NM_000969	0.9	0.961	0.72
sp|O14979|HNRDL_HUMAN	NM_000969	0.7	0.983	0.59
sp|O15116|LSM1_HUMAN	NM_000969	0.9	0.901	1.06
sp|O15226|NKRF_HUMAN	NM_000969	0.75	0.97	1.29
sp|O15234|CASC3_HUMAN	NM_000969	0.9	0.982	1.55
sp|O43148|MCES_HUMAN	NM_000969	0.75	0.974	1.22
sp|O43251|RFOX2_HUMAN	NM_000969	0.9	0.966	0.57
sp|O43310|CTIF_HUMAN	NM_000969	0.7	0.969	0.99
sp|O43347|MSI1H_HUMAN	NM_000969	0.75	0.941	1.26
sp|O43390|HNRPR_HUMAN	NM_000969	0.85	0.985	0.83
sp|O43809|CPSF5_HUMAN	NM_000969	0.75	0.863	0.96
sp|O43818|U3IP2_HUMAN	NM_000969	0.75	0.976	0.55
sp|O60381|HBP1_HUMAN	NM_000969	0.7	0.968	1.17
sp|O60506|HNRPQ_HUMAN	NM_000969	0.65	0.979	0.89
sp|O60573|IF4E2_HUMAN	NM_000969	0.85	0.878	0.99
sp|O60812|HNRCL_HUMAN	NM_000969	0.8	0.787	0.91
sp|O60832|DKC1_HUMAN	NM_000969	0.8	0.99	1.61
sp|O60870|KIN17_HUMAN	NM_000969	0.85	0.967	1.47
sp|O60930|RNH1_HUMAN	NM_000969	0.9	0.891	0.8
sp|O60936|NOL3_HUMAN	NM_000969	0.8	0.889	0.69
sp|O75319|DUS11_HUMAN	NM_000969	0.65	0.942	1.23
sp|O75494|SRS10_HUMAN	NM_000969	0.7	0.958	0.25
sp|O75525|KHDR3_HUMAN	NM_000969	0.85	0.941	1.37
sp|O75526|RMXL2_HUMAN	NM_000969	0.85	0.988	0.39
sp|O75569|PRKRA_HUMAN	NM_000969	0.85	0.958	1.3
sp|O75616|ERAL1_HUMAN	NM_000969	0.75	0.976	-0.28
sp|O75648|MTU1_HUMAN	NM_000969	0.8	0.969	0.39
sp|O75683|SURF6_HUMAN	NM_000969	0.75	0.974	1.92
sp|O75792|RNH2A_HUMAN	NM_000969	0.8	0.921	0.96
sp|P51003|PAPOA_HUMAN	NM_000969	0.9	0.971	0.52
sp|Q86SG3|DAZ4_HUMAN	NM_000969	0.8	0.946	0.78
sp|A0AV96|RBM47_HUMAN	NM_000970	0.8	0.872	2.9
sp|A1L020|MEX3A_HUMAN	NM_000970	0.75	0.932	2.18
sp|A6NC42|DPPA5_HUMAN	NM_000970	0.7	0.375	-1.35
sp|A6NDE4|RBY1B_HUMAN	NM_000970	0.7	0.926	2.48
sp|A6NDY0|EPAB2_HUMAN	NM_000970	0.65	0.601	1.35
sp|A6NFN3|RFOX3_HUMAN	NM_000970	0.8	0.884	1.61
sp|A6NGQ2|OOEP_HUMAN	NM_000970	0.7	0.539	0.62
sp|A6NHQ2|FBLL1_HUMAN	NM_000970	0.75	0.88	1.51
sp|A6NMK7|CPS4L_HUMAN	NM_000970	0.85	0.611	0.88
sp|A6NMX2|I4E1B_HUMAN	NM_000970	0.7	0.766	1.81
sp|A7MD48|SRRM4_HUMAN	NM_000970	0.7	0.952	1.56
sp|A8MWD9|RUXGL_HUMAN	NM_000970	0.8	0.926	-0.42
sp|A9UHW6|MI4GD_HUMAN	NM_000970	0.75	0.594	1.91
sp|C9JE40|PATL2_HUMAN	NM_000970	0.75	0.892	1.49
sp|O00257|CBX4_HUMAN	NM_000970	0.8	0.923	1.82
sp|O00425|IF2B3_HUMAN	NM_000970	0.7	0.907	2.31
sp|O00442|RTCA_HUMAN	NM_000970	0.75	0.964	2.54
sp|O00571|DDX3X_HUMAN	NM_000970	0.7	0.912	3.79
sp|O00584|RNT2_HUMAN	NM_000970	0.75	0.729	1.99
sp|O14717|TRDMT_HUMAN	NM_000970	0.85	0.89	1.99
sp|O14979|HNRDL_HUMAN	NM_000970	0.8	0.965	1.51
sp|O15116|LSM1_HUMAN	NM_000970	0.8	0.695	-0.72
sp|O15226|NKRF_HUMAN	NM_000970	0.7	0.927	3.48
sp|O15234|CASC3_HUMAN	NM_000970	0.6	0.97	2.68
sp|O43148|MCES_HUMAN	NM_000970	0.6	0.925	2.94
sp|O43251|RFOX2_HUMAN	NM_000970	0.85	0.909	2.03
sp|O43310|CTIF_HUMAN	NM_000970	0.6	0.927	1.88
sp|O43347|MSI1H_HUMAN	NM_000970	0.75	0.861	2.39
sp|O43390|HNRPR_HUMAN	NM_000970	0.75	0.968	2.07
sp|O43809|CPSF5_HUMAN	NM_000970	0.7	0.69	1.4
sp|O43818|U3IP2_HUMAN	NM_000970	0.9	0.939	2.26
sp|O60381|HBP1_HUMAN	NM_000970	0.7	0.934	2.4
sp|O60506|HNRPQ_HUMAN	NM_000970	0.8	0.957	2.27
sp|O60573|IF4E2_HUMAN	NM_000970	0.7	0.755	2.15
sp|O60812|HNRCL_HUMAN	NM_000970	0.6	0.551	0.92
sp|O60832|DKC1_HUMAN	NM_000970	0.7	0.982	2.81
sp|O60870|KIN17_HUMAN	NM_000970	0.65	0.912	2.11
sp|O60930|RNH1_HUMAN	NM_000970	0.8	0.654	1.12
sp|O60936|NOL3_HUMAN	NM_000970	0.8	0.501	0.59
sp|O75319|DUS11_HUMAN	NM_000970	0.75	0.837	1.24
sp|O75494|SRS10_HUMAN	NM_000970	0.65	0.878	0.87
sp|O75525|KHDR3_HUMAN	NM_000970	0.7	0.796	1.85
sp|O75526|RMXL2_HUMAN	NM_000970	0.85	0.98	1.44
sp|O75569|PRKRA_HUMAN	NM_000970	0.6	0.883	2.1
sp|O75616|ERAL1_HUMAN	NM_000970	0.65	0.954	1.19
sp|O75648|MTU1_HUMAN	NM_000970	0.8	0.933	1.69
sp|O75683|SURF6_HUMAN	NM_000970	0.8	0.915	2.93
sp|O75792|RNH2A_HUMAN	NM_000970	0.7	0.645	2.3
sp|P51003|PAPOA_HUMAN	NM_000970	0.8	0.945	3.72
sp|Q86SG3|DAZ4_HUMAN	NM_000970	0.7	0.868	1.71
sp|A0AV96|RBM47_HUMAN	NM_000973	0.75	0.788	2.02
sp|A1L020|MEX3A_HUMAN	NM_000973	0.8	0.734	0.54
sp|A6NC42|DPPA5_HUMAN	NM_000973	0.7	0.442	1.03
sp|A6NDE4|RBY1B_HUMAN	NM_000973	0.8	0.666	1.21
sp|A6NDY0|EPAB2_HUMAN	NM_000973	0.9	0.557	0.65
sp|A6NFN3|RFOX3_HUMAN	NM_000973	0.9	0.734	0.89
sp|A6NGQ2|OOEP_HUMAN	NM_000973	0.7	0.769	0.99
sp|A6NHQ2|FBLL1_HUMAN	NM_000973	0.6	0.873	0.37
sp|A6NMK7|CPS4L_HUMAN	NM_000973	0.75	0.685	1.35
sp|A6NMX2|I4E1B_HUMAN	NM_000973	0.55	0.633	0.69
sp|A7MD48|SRRM4_HUMAN	NM_000973	0.75	0.876	1.51
sp|A8MWD9|RUXGL_HUMAN	NM_000973	0.8	0.973	0.93
sp|A9UHW6|MI4GD_HUMAN	NM_000973	0.65	0.532	-0.1
sp|C9JE40|PATL2_HUMAN	NM_000973	0.85	0.748	-0.45
sp|O00257|CBX4_HUMAN	NM_000973	0.75	0.883	2.69
sp|O00425|IF2B3_HUMAN	NM_000973	0.75	0.771	2.12
sp|O00442|RTCA_HUMAN	NM_000973	0.85	0.878	1.73
sp|O00571|DDX3X_HUMAN	NM_000973	0.75	0.668	0.13
sp|O00584|RNT2_HUMAN	NM_000973	0.75	0.646	-0.64
sp|O14717|TRDMT_HUMAN	NM_000973	0.75	0.845	0.14
sp|O14979|HNRDL_HUMAN	NM_000973	0.75	0.88	-0.17
sp|O15116|LSM1_HUMAN	NM_000973	0.7	0.598	1.32
sp|O15226|NKRF_HUMAN	NM_000973	0.7	0.754	2.58
sp|O15234|CASC3_HUMAN	NM_000973	0.8	0.852	0.72
sp|O43148|MCES_HUMAN	NM_000973	0.65	0.826	-0.1
sp|O43251|RFOX2_HUMAN	NM_000973	0.8	0.715	0.17
sp|O43310|CTIF_HUMAN	NM_000973	0.6	0.793	-0.22
sp|O43347|MSI1H_HUMAN	NM_000973	0.8	0.509	0.34
sp|O43390|HNRPR_HUMAN	NM_000973	0.65	0.917	0.26
sp|O43809|CPSF5_HUMAN	NM_000973	0.75	0.465	-1.01
sp|O43818|U3IP2_HUMAN	NM_000973	0.8	0.865	-0.65
sp|O60381|HBP1_HUMAN	NM_000973	0.75	0.636	1.92
sp|O60506|HNRPQ_HUMAN	NM_000973	0.7	0.87	-0.23
sp|O60573|IF4E2_HUMAN	NM_000973	0.7	0.431	0.02
sp|O60812|HNRCL_HUMAN	NM_000973	0.7	0.317	0.46
sp|O60832|DKC1_HUMAN	NM_000973	0.8	0.921	2.06
sp|O60870|KIN17_HUMAN	NM_000973	0.7	0.802	1.62
sp|O60930|RNH1_HUMAN	NM_000973	0.7	0.595	0.77
sp|O60936|NOL3_HUMAN	NM_000973	0.65	0.792	0.48
sp|O75319|DUS11_HUMAN	NM_000973	0.8	0.699	0.79
sp|O75494|SRS10_HUMAN	NM_000973	0.6	0.865	-0.25
sp|O75525|KHDR3_HUMAN	NM_000973	0.65	0.679	1.62
sp|O75526|RMXL2_HUMAN	NM_000973	0.8	0.945	0.84
sp|O75569|PRKRA_HUMAN	NM_000973	0.75	0.684	0.95
sp|O75616|ERAL1_HUMAN	NM_000973	0.75	0.758	-1.4
sp|O75648|MTU1_HUMAN	NM_000973	0.75	0.706	0.45
sp|O75683|SURF6_HUMAN	NM_000973	0.8	0.91	1.52
sp|O75792|RNH2A_HUMAN	NM_000973	0.8	0.56	0.01
sp|P51003|PAPOA_HUMAN	NM_000973	0.65	0.764	0.17
sp|Q86SG3|DAZ4_HUMAN	NM_000973	0.7	0.575	0.03
sp|A0AV96|RBM47_HUMAN	NM_001002	0.85	0.73	-0.83
sp|A1L020|MEX3A_HUMAN	NM_001002	0.7	0.803	-0.74
sp|A6NC42|DPPA5_HUMAN	NM_001002	0.85	0.342	0.04
sp|A6NDE4|RBY1B_HUMAN	NM_001002	0.75	0.863	-0.56
sp|A6NDY0|EPAB2_HUMAN	NM_001002	0.75	0.563	-0.2
sp|A6NFN3|RFOX3_HUMAN	NM_001002	0.8	0.792	-0.55
sp|A6NGQ2|OOEP_HUMAN	NM_001002	0.8	0.626	0.32
sp|A6NHQ2|FBLL1_HUMAN	NM_001002	0.8	0.777	-0.88
sp|A6NMK7|CPS4L_HUMAN	NM_001002	0.75	0.612	-0.14
sp|A6NMX2|I4E1B_HUMAN	NM_001002	0.6	0.68	-0.25
sp|A7MD48|SRRM4_HUMAN	NM_001002	0.75	0.904	-0.22
sp|A8MWD9|RUXGL_HUMAN	NM_001002	0.85	0.958	-0.31
sp|A9UHW6|MI4GD_HUMAN	NM_001002	0.9	0.514	-0.43
sp|C9JE40|PATL2_HUMAN	NM_001002	0.85	0.828	-0.48
sp|O00257|CBX4_HUMAN	NM_001002	0.8	0.867	-0.4
sp|O00425|IF2B3_HUMAN	NM_001002	0.75	0.864	-0.25
sp|O00442|RTCA_HUMAN	NM_001002	0.85	0.93	-0.56
sp|O00571|DDX3X_HUMAN	NM_001002	0.75	0.845	-0.62
sp|O00584|RNT2_HUMAN	NM_001002	0.85	0.69	-0.21
sp|O14717|TRDMT_HUMAN	NM_001002	0.85	0.846	-0.26
sp|O14979|HNRDL_HUMAN	NM_001002	0.75	0.923	-0.69
sp|O15116|LSM1_HUMAN	NM_001002	0.85	0.605	0.22
sp|O15226|NKRF_HUMAN	NM_001002	0.8	0.89	-1.63
sp|O15234|CASC3_HUMAN	NM_001002	0.85	0.922	-0.63
sp|O43148|MCES_HUMAN	NM_001002	0.75	0.901	-0.17
sp|O43251|RFOX2_HUMAN	NM_001002	0.7	0.772	-0.49
sp|O43310|CTIF_HUMAN	NM_001002	0.8	0.9	-0.24
sp|O43347|MSI1H_HUMAN	NM_001002	0.7	0.702	-0.6
sp|O43390|HNRPR_HUMAN	NM_001002	0.7	0.946	-0.72
sp|O43809|CPSF5_HUMAN	NM_001002	0.75	0.569	-0.43
sp|O43818|U3IP2_HUMAN	NM_001002	0.9	0.874	-0.47
sp|O60381|HBP1_HUMAN	NM_001002	0.8	0.879	-0.6
sp|O60506|HNRPQ_HUMAN	NM_001002	0.75	0.909	-0.59
sp|O60573|IF4E2_HUMAN	NM_001002	0.65	0.644	-0.3
sp|O60812|HNRCL_HUMAN	NM_001002	0.85	0.423	-0.58
sp|O60832|DKC1_HUMAN	NM_001002	0.75	0.965	-0.27
sp|O60870|KIN17_HUMAN	NM_001002	0.8	0.873	-0.32
sp|O60930|RNH1_HUMAN	NM_001002	0.75	0.605	-0.27
sp|O60936|NOL3_HUMAN	NM_001002	0.8	0.552	-0.34
sp|O75319|DUS11_HUMAN	NM_001002	0.75	0.771	-0.65
sp|O75494|SRS10_HUMAN	NM_001002	0.65	0.827	-0.29
sp|O75525|KHDR3_HUMAN	NM_001002	0.7	0.766	-0.65
sp|O75526|RMXL2_HUMAN	NM_001002	0.75	0.966	-0.69
sp|O75569|PRKRA_HUMAN	NM_001002	0.75	0.837	-0.63
sp|O75616|ERAL1_HUMAN	NM_001002	0.7	0.9	-0.33
sp|O75648|MTU1_HUMAN	NM_001002	0.85	0.861	-0.68
sp|O75683|SURF6_HUMAN	NM_001002	0.8	0.876	-0.36
sp|O75792|RNH2A_HUMAN	NM_001002	0.65	0.597	-0.24
sp|P51003|PAPOA_HUMAN	NM_001002	0.95	0.872	-1.3
sp|Q86SG3|DAZ4_HUMAN	NM_001002	0.8	0.696	-0.43
sp|A0AV96|RBM47_HUMAN	NM_001003	0.7	0.457	0.11
sp|A1L020|MEX3A_HUMAN	NM_001003	0.75	0.532	0.08
sp|A6NC42|DPPA5_HUMAN	NM_001003	0.75	0.24	1.32
sp|A6NDE4|RBY1B_HUMAN	NM_001003	0.7	0.601	1.47
sp|A6NDY0|EPAB2_HUMAN	NM_001003	0.85	0.309	1.09
sp|A6NFN3|RFOX3_HUMAN	NM_001003	0.85	0.518	0.44
sp|A6NGQ2|OOEP_HUMAN	NM_001003	0.95	0.441	1.6
sp|A6NHQ2|FBLL1_HUMAN	NM_001003	0.8	0.583	-0.47
sp|A6NMK7|CPS4L_HUMAN	NM_001003	0.75	0.49	1.17
sp|A6NMX2|I4E1B_HUMAN	NM_001003	0.7	0.396	0.62
sp|A7MD48|SRRM4_HUMAN	NM_001003	0.7	0.781	0.91
sp|A8MWD9|RUXGL_HUMAN	NM_001003	0.85	0.91	1.27
sp|A9UHW6|MI4GD_HUMAN	NM_001003	0.8	0.315	0.49
sp|C9JE40|PATL2_HUMAN	NM_001003	0.75	0.575	-0.19
sp|O00257|CBX4_HUMAN	NM_001003	0.8	0.648	0.8
sp|O00425|IF2B3_HUMAN	NM_001003	0.7	0.566	0.86
sp|O00442|RTCA_HUMAN	NM_001003	0.85	0.792	1.58
sp|O00571|DDX3X_HUMAN	NM_001003	0.75	0.555	-0.22
sp|O00584|RNT2_HUMAN	NM_001003	0.8	0.504	0.01
sp|O14717|TRDMT_HUMAN	NM_001003	0.7	0.64	1.02
sp|O14979|HNRDL_HUMAN	NM_001003	0.85	0.731	-0.37
sp|O15116|LSM1_HUMAN	NM_001003	0.9	0.424	1.34
sp|O15226|NKRF_HUMAN	NM_001003	0.65	0.727	0.59
sp|O15234|CASC3_HUMAN	NM_001003	0.65	0.725	0
sp|O43148|MCES_HUMAN	NM_001003	0.7	0.676	0.53
sp|O43251|RFOX2_HUMAN	NM_001003	0.75	0.471	0.61
sp|O43310|CTIF_HUMAN	NM_001003	0.75	0.731	-0.43
sp|O43347|MSI1H_HUMAN	NM_001003	0.8	0.422	0.7
sp|O43390|HNRPR_HUMAN	NM_001003	0.75	0.779	0.82
sp|O43809|CPSF5_HUMAN	NM_001003	0.8	0.308	-0.16
sp|O43818|U3IP2_HUMAN	NM_001003	0.7	0.645	0.07
sp|O60381|HBP1_HUMAN	NM_001003	0.7	0.684	1.02
sp|O60506|HNRPQ_HUMAN	NM_001003	0.8	0.668	0.57
sp|O60573|IF4E2_HUMAN	NM_001003	0.75	0.325	0.25
sp|O60812|HNRCL_HUMAN	NM_001003	0.55	0.183	0.44
sp|O60832|DKC1_HUMAN	NM_001003	0.75	0.856	1.35
sp|O60870|KIN17_HUMAN	NM_001003	0.85	0.676	1.25
sp|O60930|RNH1_HUMAN	NM_001003	0.75	0.388	0.51
sp|O60936|NOL3_HUMAN	NM_001003	0.75	0.411	0.81
sp|O75319|DUS11_HUMAN	NM_001003	0.65	0.53	0.79
sp|O75494|SRS10_HUMAN	NM_001003	0.6	0.658	0.19
sp|O75525|KHDR3_HUMAN	NM_001003	0.8	0.462	1.46
sp|O75526|RMXL2_HUMAN	NM_001003	0.8	0.869	1.38
sp|O75569|PRKRA_HUMAN	NM_001003	0.7	0.573	0.92
sp|O75616|ERAL1_HUMAN	NM_001003	0.7	0.679	-0.95
sp|O75648|MTU1_HUMAN	NM_001003	0.75	0.612	0.14
sp|O75683|SURF6_HUMAN	NM_001003	0.8	0.72	1.27
sp|O75792|RNH2A_HUMAN	NM_001003	0.75	0.328	0.08
sp|P51003|PAPOA_HUMAN	NM_001003	0.9	0.61	0.54
sp|Q86SG3|DAZ4_HUMAN	NM_001003	0.65	0.462	-0.28
sp|A0AV96|RBM47_HUMAN	NM_001010	0.75	0.933	-0.16
sp|A1L020|MEX3A_HUMAN	NM_001010	0.8	0.937	-0.13
sp|A6NC42|DPPA5_HUMAN	NM_001010	0.65	0.599	-0.11
sp|A6NDE4|RBY1B_HUMAN	NM_001010	0.8	0.939	0.37
sp|A6NDY0|EPAB2_HUMAN	NM_001010	0.7	0.752	0.61
sp|A6NFN3|RFOX3_HUMAN	NM_001010	0.75	0.926	0.31
sp|A6NGQ2|OOEP_HUMAN	NM_001010	0.75	0.767	0.8
sp|A6NHQ2|FBLL1_HUMAN	NM_001010	0.7	0.948	-0.6
sp|A6NMK7|CPS4L_HUMAN	NM_001010	0.8	0.779	0.77
sp|A6NMX2|I4E1B_HUMAN	NM_001010	0.7	0.875	0.5
sp|A7MD48|SRRM4_HUMAN	NM_001010	0.75	0.978	-0.19
sp|A8MWD9|RUXGL_HUMAN	NM_001010	0.85	0.982	0.06
sp|A9UHW6|MI4GD_HUMAN	NM_001010	0.9	0.764	0.22
sp|C9JE40|PATL2_HUMAN	NM_001010	0.8	0.929	-1.53
sp|O00257|CBX4_HUMAN	NM_001010	0.8	0.958	-0.31
sp|O00425|IF2B3_HUMAN	NM_001010	0.8	0.934	-0.2
sp|O00442|RTCA_HUMAN	NM_001010	0.6	0.972	0.53
sp|O00571|DDX3X_HUMAN	NM_001010	0.7	0.922	-0.64
sp|O00584|RNT2_HUMAN	NM_001010	0.75	0.795	0.41
sp|O14717|TRDMT_HUMAN	NM_001010	0.9	0.94	-0.47
sp|O14979|HNRDL_HUMAN	NM_001010	0.8	0.973	-0.28
sp|O15116|LSM1_HUMAN	NM_001010	0.95	0.834	0.43
sp|O15226|NKRF_HUMAN	NM_001010	0.65	0.942	-0.8
sp|O15234|CASC3_HUMAN	NM_001010	0.75	0.975	-1.39
sp|O43148|MCES_HUMAN	NM_001010	0.7	0.952	-0.45
sp|O43251|RFOX2_HUMAN	NM_001010	0.75	0.941	-0.38
sp|O43310|CTIF_HUMAN	NM_001010	0.65	0.944	-1.17
sp|O43347|MSI1H_HUMAN	NM_001010	0.75	0.889	0.61
sp|O43390|HNRPR_HUMAN	NM_001010	0.7	0.978	-0.57
sp|O43809|CPSF5_HUMAN	NM_001010	0.75	0.744	0
sp|O43818|U3IP2_HUMAN	NM_001010	0.85	0.964	-0.76
sp|O60381|HBP1_HUMAN	NM_001010	0.75	0.943	0.36
sp|O60506|HNRPQ_HUMAN	NM_001010	0.8	0.969	-0.85
sp|O60573|IF4E2_HUMAN	NM_001010	0.9	0.788	0.63
sp|O60812|HNRCL_HUMAN	NM_001010	0.65	0.649	0.51
sp|O60832|DKC1_HUMAN	NM_001010	0.8	0.984	0.27
sp|O60870|KIN17_HUMAN	NM_001010	0.65	0.945	-0.41
sp|O60930|RNH1_HUMAN	NM_001010	0.8	0.78	0.7
sp|O60936|NOL3_HUMAN	NM_001010	0.85	0.819	0.19
sp|O75319|DUS11_HUMAN	NM_001010	0.8	0.897	0.25
sp|O75494|SRS10_HUMAN	NM_001010	0.7	0.952	0.11
sp|O75525|KHDR3_HUMAN	NM_001010	0.75	0.875	0.21
sp|O75526|RMXL2_HUMAN	NM_001010	0.75	0.982	0.3
sp|O75569|PRKRA_HUMAN	NM_001010	0.75	0.914	0.64
sp|O75616|ERAL1_HUMAN	NM_001010	0.75	0.959	-0.93
sp|O75648|MTU1_HUMAN	NM_001010	0.95	0.942	-0.2
sp|O75683|SURF6_HUMAN	NM_001010	0.85	0.97	0.67
sp|O75792|RNH2A_HUMAN	NM_001010	0.9	0.824	0.43
sp|P51003|PAPOA_HUMAN	NM_001010	0.8	0.958	-1.09
sp|Q86SG3|DAZ4_HUMAN	NM_001010	0.8	0.915	-0.84
sp|A0AV96|RBM47_HUMAN	NM_001012	0.85	0.909	1.98
sp|A1L020|MEX3A_HUMAN	NM_001012	0.8	0.908	0.72
sp|A6NC42|DPPA5_HUMAN	NM_001012	0.8	0.53	0.69
sp|A6NDE4|RBY1B_HUMAN	NM_001012	0.7	0.866	0.76
sp|A6NDY0|EPAB2_HUMAN	NM_001012	0.75	0.713	0.99
sp|A6NFN3|RFOX3_HUMAN	NM_001012	0.75	0.886	0.02
sp|A6NGQ2|OOEP_HUMAN	NM_001012	0.75	0.768	0.74
sp|A6NHQ2|FBLL1_HUMAN	NM_001012	0.9	0.937	-0.81
sp|A6NMK7|CPS4L_HUMAN	NM_001012	0.85	0.762	0.89
sp|A6NMX2|I4E1B_HUMAN	NM_001012	0.65	0.819	0.99
sp|A7MD48|SRRM4_HUMAN	NM_001012	0.9	0.943	1
sp|A8MWD9|RUXGL_HUMAN	NM_001012	0.85	0.98	0.52
sp|A9UHW6|MI4GD_HUMAN	NM_001012	0.9	0.698	0.77
sp|C9JE40|PATL2_HUMAN	NM_001012	0.75	0.866	0.63
sp|O00257|CBX4_HUMAN	NM_001012	0.8	0.95	1.91
sp|O00425|IF2B3_HUMAN	NM_001012	0.75	0.907	1.71
sp|O00442|RTCA_HUMAN	NM_001012	0.85	0.953	0.76
sp|O00571|DDX3X_HUMAN	NM_001012	0.8	0.877	1.71
sp|O00584|RNT2_HUMAN	NM_001012	0.8	0.757	0.34
sp|O14717|TRDMT_HUMAN	NM_001012	0.9	0.893	-0.2
sp|O14979|HNRDL_HUMAN	NM_001012	0.7	0.96	-1.05
sp|O15116|LSM1_HUMAN	NM_001012	0.9	0.751	1.02
sp|O15226|NKRF_HUMAN	NM_001012	0.7	0.909	2.83
sp|O15234|CASC3_HUMAN	NM_001012	0.75	0.948	2.25
sp|O43148|MCES_HUMAN	NM_001012	0.65	0.929	0.38
sp|O43251|RFOX2_HUMAN	NM_001012	0.9	0.883	-0.14
sp|O43310|CTIF_HUMAN	NM_001012	0.7	0.901	1.89
sp|O43347|MSI1H_HUMAN	NM_001012	0.75	0.778	0.28
sp|O43390|HNRPR_HUMAN	NM_001012	0.7	0.971	1.35
sp|O43809|CPSF5_HUMAN	NM_001012	0.75	0.637	0.32
sp|O43818|U3IP2_HUMAN	NM_001012	0.85	0.95	0.01
sp|O60381|HBP1_HUMAN	NM_001012	0.85	0.857	0.75
sp|O60506|HNRPQ_HUMAN	NM_001012	0.75	0.957	1.08
sp|O60573|IF4E2_HUMAN	NM_001012	0.85	0.677	1.08
sp|O60812|HNRCL_HUMAN	NM_001012	0.65	0.572	0.38
sp|O60832|DKC1_HUMAN	NM_001012	0.8	0.976	2.1
sp|O60870|KIN17_HUMAN	NM_001012	0.75	0.915	-0.24
sp|O60930|RNH1_HUMAN	NM_001012	0.8	0.784	0.3
sp|O60936|NOL3_HUMAN	NM_001012	0.9	0.85	0.72
sp|O75319|DUS11_HUMAN	NM_001012	0.8	0.836	0.14
sp|O75494|SRS10_HUMAN	NM_001012	0.8	0.915	0.14
sp|O75525|KHDR3_HUMAN	NM_001012	0.7	0.841	1.04
sp|O75526|RMXL2_HUMAN	NM_001012	0.75	0.977	0.44
sp|O75569|PRKRA_HUMAN	NM_001012	0.75	0.851	0.33
sp|O75616|ERAL1_HUMAN	NM_001012	0.85	0.915	-1.3
sp|O75648|MTU1_HUMAN	NM_001012	0.8	0.899	-0.36
sp|O75683|SURF6_HUMAN	NM_001012	0.9	0.957	0.45
sp|O75792|RNH2A_HUMAN	NM_001012	0.8	0.781	-0.64
sp|P51003|PAPOA_HUMAN	NM_001012	0.9	0.9	2.6
sp|Q86SG3|DAZ4_HUMAN	NM_001012	0.9	0.789	0.94
sp|A0AV96|RBM47_HUMAN	NM_001020	0.9	0.918	1.53
sp|A1L020|MEX3A_HUMAN	NM_001020	0.8	0.908	0.9
sp|A6NC42|DPPA5_HUMAN	NM_001020	0.75	0.775	1.45
sp|A6NDE4|RBY1B_HUMAN	NM_001020	0.75	0.903	1.48
sp|A6NDY0|EPAB2_HUMAN	NM_001020	0.75	0.848	1.76
sp|A6NFN3|RFOX3_HUMAN	NM_001020	0.9	0.92	0.78
sp|A6NGQ2|OOEP_HUMAN	NM_001020	0.7	0.908	2.24
sp|A6NHQ2|FBLL1_HUMAN	NM_001020	0.85	0.938	-0.62
sp|A6NMK7|CPS4L_HUMAN	NM_001020	0.9	0.89	1.64
sp|A6NMX2|I4E1B_HUMAN	NM_001020	0.8	0.891	0.99
sp|A7MD48|SRRM4_HUMAN	NM_001020	0.85	0.956	1.65
sp|A8MWD9|RUXGL_HUMAN	NM_001020	0.85	0.988	1.42
sp|A9UHW6|MI4GD_HUMAN	NM_001020	0.75	0.831	0.88
sp|C9JE40|PATL2_HUMAN	NM_001020	0.7	0.925	0.56
sp|O00257|CBX4_HUMAN	NM_001020	0.95	0.957	2
sp|O00425|IF2B3_HUMAN	NM_001020	0.75	0.934	2.07
sp|O00442|RTCA_HUMAN	NM_001020	0.7	0.955	1.29
sp|O00571|DDX3X_HUMAN	NM_001020	0.75	0.908	0.93
sp|O00584|RNT2_HUMAN	NM_001020	0.8	0.871	0.39
sp|O14717|TRDMT_HUMAN	NM_001020	0.75	0.941	0.79
sp|O14979|HNRDL_HUMAN	NM_001020	0.85	0.962	-0.53
sp|O15116|LSM1_HUMAN	NM_001020	0.75	0.859	2.01
sp|O15226|NKRF_HUMAN	NM_001020	0.6	0.94	1.65
sp|O15234|CASC3_HUMAN	NM_001020	0.7	0.953	1.46
sp|O43148|MCES_HUMAN	NM_001020	0.55	0.953	1.13
sp|O43251|RFOX2_HUMAN	NM_001020	0.9	0.912	0.39
sp|O43310|CTIF_HUMAN	NM_001020	0.8	0.946	1.37
sp|O43347|MSI1H_HUMAN	NM_001020	0.8	0.839	0.68
sp|O43390|HNRPR_HUMAN	NM_001020	0.7	0.971	1.5
sp|O43809|CPSF5_HUMAN	NM_001020	0.75	0.806	0.35
sp|O43818|U3IP2_HUMAN	NM_001020	0.95	0.952	0.41
sp|O60381|HBP1_HUMAN	NM_001020	0.6	0.912	1.32
sp|O60506|HNRPQ_HUMAN	NM_001020	0.85	0.958	1.34
sp|O60573|IF4E2_HUMAN	NM_001020	0.55	0.787	0.9
sp|O60812|HNRCL_HUMAN	NM_001020	0.65	0.72	0.8
sp|O60832|DKC1_HUMAN	NM_001020	0.7	0.975	2.57
sp|O60870|KIN17_HUMAN	NM_001020	0.7	0.946	0.93
sp|O60930|RNH1_HUMAN	NM_001020	0.8	0.855	1.06
sp|O60936|NOL3_HUMAN	NM_001020	0.9	0.897	1.06
sp|O75319|DUS11_HUMAN	NM_001020	0.6	0.899	0.84
sp|O75494|SRS10_HUMAN	NM_001020	0.85	0.932	0.42
sp|O75525|KHDR3_HUMAN	NM_001020	0.65	0.899	1.68
sp|O75526|RMXL2_HUMAN	NM_001020	0.8	0.975	1.01
sp|O75569|PRKRA_HUMAN	NM_001020	0.75	0.914	1.2
sp|O75616|ERAL1_HUMAN	NM_001020	0.7	0.929	-1.09
sp|O75648|MTU1_HUMAN	NM_001020	0.7	0.92	-0.17
sp|O75683|SURF6_HUMAN	NM_001020	0.95	0.963	1.19
sp|O75792|RNH2A_HUMAN	NM_001020	0.7	0.869	0.48
sp|P51003|PAPOA_HUMAN	NM_001020	0.75	0.922	1.15
sp|Q86SG3|DAZ4_HUMAN	NM_001020	0.9	0.866	0.88
sp|A0AV96|RBM47_HUMAN	NM_001143760	0.75	0.518	-0.6
sp|A1L020|MEX3A_HUMAN	NM_001143760	0.85	0.562	-0.39
sp|A6NC42|DPPA5_HUMAN	NM_001143760	0.7	0.197	0.45
sp|A6NDE4|RBY1B_HUMAN	NM_001143760	0.65	0.616	0.21
sp|A6NDY0|EPAB2_HUMAN	NM_001143760	0.85	0.355	0.43
sp|A6NFN3|RFOX3_HUMAN	NM_001143760	0.75	0.562	-0.07
sp|A6NGQ2|OOEP_HUMAN	NM_001143760	0.95	0.488	0.96
sp|A6NHQ2|FBLL1_HUMAN	NM_001143760	0.85	0.615	-0.78
sp|A6NMK7|CPS4L_HUMAN	NM_001143760	0.85	0.525	0.53
sp|A6NMX2|I4E1B_HUMAN	NM_001143760	0.7	0.393	-0.03
sp|A7MD48|SRRM4_HUMAN	NM_001143760	0.7	0.757	0.22
sp|A8MWD9|RUXGL_HUMAN	NM_001143760	0.95	0.942	0.15
sp|A9UHW6|MI4GD_HUMAN	NM_001143760	0.95	0.313	-0.1
sp|C9JE40|PATL2_HUMAN	NM_001143760	0.65	0.565	-0.16
sp|O00257|CBX4_HUMAN	NM_001143760	0.75	0.635	0.11
sp|O00425|IF2B3_HUMAN	NM_001143760	0.8	0.629	0.1
sp|O00442|RTCA_HUMAN	NM_001143760	0.75	0.811	-0.1
sp|O00571|DDX3X_HUMAN	NM_001143760	0.65	0.567	-0.68
sp|O00584|RNT2_HUMAN	NM_001143760	0.75	0.465	-0.12
sp|O14717|TRDMT_HUMAN	NM_001143760	0.95	0.646	0.29
sp|O14979|HNRDL_HUMAN	NM_001143760	0.75	0.764	-0.6
sp|O15116|LSM1_HUMAN	NM_001143760	0.85	0.394	0.68
sp|O15226|NKRF_HUMAN	NM_001143760	0.7	0.719	-0.03
sp|O15234|CASC3_HUMAN	NM_001143760	0.75	0.752	0.12
sp|O43148|MCES_HUMAN	NM_001143760	0.65	0.697	0.29
sp|O43251|RFOX2_HUMAN	NM_001143760	0.8	0.527	-0.23
sp|O43310|CTIF_HUMAN	NM_001143760	0.65	0.736	-0.06
sp|O43347|MSI1H_HUMAN	NM_001143760	0.8	0.415	-0.18
sp|O43390|HNRPR_HUMAN	NM_001143760	0.8	0.827	0.01
sp|O43809|CPSF5_HUMAN	NM_001143760	0.65	0.293	-0.1
sp|O43818|U3IP2_HUMAN	NM_001143760	0.85	0.67	-0.3
sp|O60381|HBP1_HUMAN	NM_001143760	0.75	0.648	0.12
sp|O60506|HNRPQ_HUMAN	NM_001143760	0.9	0.723	0.14
sp|O60573|IF4E2_HUMAN	NM_001143760	0.8	0.345	-0.21
sp|O60812|HNRCL_HUMAN	NM_001143760	0.75	0.189	-0.42
sp|O60832|DKC1_HUMAN	NM_001143760	0.65	0.868	0.31
sp|O60870|KIN17_HUMAN	NM_001143760	0.7	0.596	0.29
sp|O60930|RNH1_HUMAN	NM_001143760	0.8	0.399	0.03
sp|O60936|NOL3_HUMAN	NM_001143760	0.85	0.446	0.14
sp|O75319|DUS11_HUMAN	NM_001143760	0.65	0.525	-0.23
sp|O75494|SRS10_HUMAN	NM_001143760	0.8	0.674	-0.09
sp|O75525|KHDR3_HUMAN	NM_001143760	0.75	0.525	0.09
sp|O75526|RMXL2_HUMAN	NM_001143760	0.8	0.909	-0.35
sp|O75569|PRKRA_HUMAN	NM_001143760	0.65	0.536	0.14
sp|O75616|ERAL1_HUMAN	NM_001143760	0.7	0.662	-0.43
sp|O75648|MTU1_HUMAN	NM_001143760	0.8	0.585	-0.65
sp|O75683|SURF6_HUMAN	NM_001143760	0.8	0.691	0.34
sp|O75792|RNH2A_HUMAN	NM_001143760	0.75	0.372	-0.08
sp|P51003|PAPOA_HUMAN	NM_001143760	0.85	0.572	-0.47
sp|Q86SG3|DAZ4_HUMAN	NM_001143760	0.9	0.358	-0.28
sp|A0AV96|RBM47_HUMAN	NM_001143761	0.7	0.483	-0.6
sp|A1L020|MEX3A_HUMAN	NM_001143761	0.8	0.495	-0.39
sp|A6NC42|DPPA5_HUMAN	NM_001143761	0.7	0.187	0.45
sp|A6NDE4|RBY1B_HUMAN	NM_001143761	0.7	0.498	0.21
sp|A6NDY0|EPAB2_HUMAN	NM_001143761	0.8	0.312	0.43
sp|A6NFN3|RFOX3_HUMAN	NM_001143761	0.65	0.496	-0.07
sp|A6NGQ2|OOEP_HUMAN	NM_001143761	0.9	0.488	0.96
sp|A6NHQ2|FBLL1_HUMAN	NM_001143761	0.8	0.612	-0.78
sp|A6NMK7|CPS4L_HUMAN	NM_001143761	0.75	0.508	0.53
sp|A6NMX2|I4E1B_HUMAN	NM_001143761	0.65	0.34	-0.03
sp|A7MD48|SRRM4_HUMAN	NM_001143761	0.65	0.714	0.22
sp|A8MWD9|RUXGL_HUMAN	NM_001143761	0.85	0.939	0.15
sp|A9UHW6|MI4GD_HUMAN	NM_001143761	0.8	0.273	-0.1
sp|C9JE40|PATL2_HUMAN	NM_001143761	0.65	0.507	-0.16
sp|O00257|CBX4_HUMAN	NM_001143761	0.7	0.611	0.11
sp|O00425|IF2B3_HUMAN	NM_001143761	0.75	0.553	0.1
sp|O00442|RTCA_HUMAN	NM_001143761	0.75	0.76	-0.1
sp|O00571|DDX3X_HUMAN	NM_001143761	0.65	0.468	-0.68
sp|O00584|RNT2_HUMAN	NM_001143761	0.65	0.418	-0.12
sp|O14717|TRDMT_HUMAN	NM_001143761	0.75	0.61	0.29
sp|O14979|HNRDL_HUMAN	NM_001143761	0.7	0.718	-0.6
sp|O15116|LSM1_HUMAN	NM_001143761	0.85	0.356	0.68
sp|O15226|NKRF_HUMAN	NM_001143761	0.7	0.635	-0.03
sp|O15234|CASC3_HUMAN	NM_001143761	0.7	0.694	0.12
sp|O43148|MCES_HUMAN	NM_001143761	0.65	0.62	0.29
sp|O43251|RFOX2_HUMAN	NM_001143761	0.8	0.452	-0.23
sp|O43310|CTIF_HUMAN	NM_001143761	0.6	0.661	-0.06
sp|O43347|MSI1H_HUMAN	NM_001143761	0.8	0.329	-0.18
sp|O43390|HNRPR_HUMAN	NM_001143761	0.75	0.792	0.01
sp|O43809|CPSF5_HUMAN	NM_001143761	0.6	0.243	-0.1
sp|O43818|U3IP2_HUMAN	NM_001143761	0.8	0.639	-0.3
sp|O60381|HBP1_HUMAN	NM_001143761	0.65	0.528	0.12
sp|O60506|HNRPQ_HUMAN	NM_001143761	0.8	0.68	0.14
sp|O60573|IF4E2_HUMAN	NM_001143761	0.8	0.26	-0.21
sp|O60812|HNRCL_HUMAN	NM_001143761	0.8	0.145	-0.42
sp|O60832|DKC1_HUMAN	NM_001143761	0.7	0.822	0.31
sp|O60870|KIN17_HUMAN	NM_001143761	0.75	0.543	0.29
sp|O60930|RNH1_HUMAN	NM_001143761	0.85	0.35	0.03
sp|O60936|NOL3_HUMAN	NM_001143761	0.75	0.468	0.14
sp|O75319|DUS11_HUMAN	NM_001143761	0.65	0.453	-0.23
sp|O75494|SRS10_HUMAN	NM_001143761	0.65	0.646	-0.09
sp|O75525|KHDR3_HUMAN	NM_001143761	0.8	0.441	0.09
sp|O75526|RMXL2_HUMAN	NM_001143761	0.8	0.886	-0.35
sp|O75569|PRKRA_HUMAN	NM_001143761	0.6	0.444	0.14
sp|O75616|ERAL1_HUMAN	NM_001143761	0.6	0.57	-0.43
sp|O75648|MTU1_HUMAN	NM_001143761	0.65	0.494	-0.65
sp|O75683|SURF6_HUMAN	NM_001143761	0.75	0.693	0.34
sp|O75792|RNH2A_HUMAN	NM_001143761	0.7	0.306	-0.08
sp|P51003|PAPOA_HUMAN	NM_001143761	0.75	0.487	-0.47
sp|Q86SG3|DAZ4_HUMAN	NM_001143761	0.8	0.285	-0.28
sp|A0AV96|RBM47_HUMAN	NM_001159287	0.8	0.388	-0.76
sp|A1L020|MEX3A_HUMAN	NM_001159287	0.8	0.331	-0.73
sp|A6NC42|DPPA5_HUMAN	NM_001159287	0.8	0.174	-0.29
sp|A6NDE4|RBY1B_HUMAN	NM_001159287	0.65	0.37	-0.76
sp|A6NDY0|EPAB2_HUMAN	NM_001159287	0.75	0.249	-0.29
sp|A6NFN3|RFOX3_HUMAN	NM_001159287	0.7	0.366	-0.67
sp|A6NGQ2|OOEP_HUMAN	NM_001159287	0.75	0.42	-0.05
sp|A6NHQ2|FBLL1_HUMAN	NM_001159287	0.9	0.499	-0.72
sp|A6NMK7|CPS4L_HUMAN	NM_001159287	0.9	0.434	-0.33
sp|A6NMX2|I4E1B_HUMAN	NM_001159287	0.75	0.289	-0.27
sp|A7MD48|SRRM4_HUMAN	NM_001159287	0.85	0.611	-0.43
sp|A8MWD9|RUXGL_HUMAN	NM_001159287	0.8	0.897	-0.44
sp|A9UHW6|MI4GD_HUMAN	NM_001159287	0.9	0.224	-0.45
sp|C9JE40|PATL2_HUMAN	NM_001159287	0.8	0.374	-0.4
sp|O00257|CBX4_HUMAN	NM_001159287	0.75	0.505	-0.6
sp|O00425|IF2B3_HUMAN	NM_001159287	0.8	0.429	-0.31
sp|O00442|RTCA_HUMAN	NM_001159287	0.8	0.579	-0.68
sp|O00571|DDX3X_HUMAN	NM_001159287	0.75	0.32	-0.45
sp|O00584|RNT2_HUMAN	NM_001159287	0.8	0.341	-0.25
sp|O14717|TRDMT_HUMAN	NM_001159287	0.85	0.482	-0.37
sp|O14979|HNRDL_HUMAN	NM_001159287	0.85	0.555	-0.67
sp|O15116|LSM1_HUMAN	NM_001159287	0.75	0.283	-0.18
sp|O15226|NKRF_HUMAN	NM_001159287	0.65	0.473	-1.66
sp|O15234|CASC3_HUMAN	NM_001159287	0.75	0.496	-0.77
sp|O43148|MCES_HUMAN	NM_001159287	0.55	0.533	-0.27
sp|O43251|RFOX2_HUMAN	NM_001159287	0.8	0.34	-0.5
sp|O43310|CTIF_HUMAN	NM_001159287	0.7	0.506	-0.27
sp|O43347|MSI1H_HUMAN	NM_001159287	0.8	0.215	-0.6
sp|O43390|HNRPR_HUMAN	NM_001159287	0.75	0.635	-0.89
sp|O43809|CPSF5_HUMAN	NM_001159287	0.7	0.18	-0.44
sp|O43818|U3IP2_HUMAN	NM_001159287	0.8	0.506	-0.55
sp|O60381|HBP1_HUMAN	NM_001159287	0.7	0.362	-0.77
sp|O60506|HNRPQ_HUMAN	NM_001159287	0.7	0.523	-0.76
sp|O60573|IF4E2_HUMAN	NM_001159287	0.8	0.178	-0.35
sp|O60812|HNRCL_HUMAN	NM_001159287	0.7	0.117	-0.46
sp|O60832|DKC1_HUMAN	NM_001159287	0.75	0.668	-0.45
sp|O60870|KIN17_HUMAN	NM_001159287	0.75	0.45	-0.5
sp|O60930|RNH1_HUMAN	NM_001159287	0.8	0.306	-0.34
sp|O60936|NOL3_HUMAN	NM_001159287	0.8	0.393	-0.44
sp|O75319|DUS11_HUMAN	NM_001159287	0.8	0.364	-0.8
sp|O75494|SRS10_HUMAN	NM_001159287	0.8	0.545	-0.31
sp|O75525|KHDR3_HUMAN	NM_001159287	0.75	0.385	-0.71
sp|O75526|RMXL2_HUMAN	NM_001159287	0.75	0.747	-0.68
sp|O75569|PRKRA_HUMAN	NM_001159287	0.85	0.35	-0.61
sp|O75616|ERAL1_HUMAN	NM_001159287	0.65	0.404	-0.3
sp|O75648|MTU1_HUMAN	NM_001159287	0.8	0.356	-0.59
sp|O75683|SURF6_HUMAN	NM_001159287	0.9	0.594	-0.51
sp|O75792|RNH2A_HUMAN	NM_001159287	0.75	0.275	-0.31
sp|P51003|PAPOA_HUMAN	NM_001159287	0.85	0.369	-1.02
sp|Q86SG3|DAZ4_HUMAN	NM_001159287	0.9	0.239	-0.39
sp|A0AV96|RBM47_HUMAN	NM_001175	0.8	0.859	-0.66
sp|A1L020|MEX3A_HUMAN	NM_001175	0.8	0.89	-0.53
sp|A6NC42|DPPA5_HUMAN	NM_001175	0.75	0.533	-0.33
sp|A6NDE4|RBY1B_HUMAN	NM_001175	0.75	0.916	-0.35
sp|A6NDY0|EPAB2_HUMAN	NM_001175	0.75	0.737	-0.42
sp|A6NFN3|RFOX3_HUMAN	NM_001175	0.85	0.886	-0.65
sp|A6NGQ2|OOEP_HUMAN	NM_001175	0.85	0.758	-0.28
sp|A6NHQ2|FBLL1_HUMAN	NM_001175	0.85	0.878	-0.58
sp|A6NMK7|CPS4L_HUMAN	NM_001175	0.95	0.765	-0.3
sp|A6NMX2|I4E1B_HUMAN	NM_001175	0.65	0.843	-0.3
sp|A7MD48|SRRM4_HUMAN	NM_001175	0.75	0.937	-0.25
sp|A8MWD9|RUXGL_HUMAN	NM_001175	0.8	0.973	-0.36
sp|A9UHW6|MI4GD_HUMAN	NM_001175	0.9	0.738	-0.5
sp|C9JE40|PATL2_HUMAN	NM_001175	0.75	0.885	-0.23
sp|O00257|CBX4_HUMAN	NM_001175	0.85	0.92	-0.36
sp|O00425|IF2B3_HUMAN	NM_001175	0.75	0.904	-0.25
sp|O00442|RTCA_HUMAN	NM_001175	0.8	0.947	-0.49
sp|O00571|DDX3X_HUMAN	NM_001175	0.7	0.897	-0.36
sp|O00584|RNT2_HUMAN	NM_001175	0.75	0.792	-0.27
sp|O14717|TRDMT_HUMAN	NM_001175	0.8	0.891	-0.31
sp|O14979|HNRDL_HUMAN	NM_001175	0.75	0.948	-0.62
sp|O15116|LSM1_HUMAN	NM_001175	0.75	0.755	-0.38
sp|O15226|NKRF_HUMAN	NM_001175	0.75	0.931	-0.64
sp|O15234|CASC3_HUMAN	NM_001175	0.8	0.945	-0.45
sp|O43148|MCES_HUMAN	NM_001175	0.6	0.937	-0.29
sp|O43251|RFOX2_HUMAN	NM_001175	0.8	0.882	-0.48
sp|O43310|CTIF_HUMAN	NM_001175	0.7	0.933	-0.32
sp|O43347|MSI1H_HUMAN	NM_001175	0.85	0.829	-0.54
sp|O43390|HNRPR_HUMAN	NM_001175	0.75	0.96	-0.49
sp|O43809|CPSF5_HUMAN	NM_001175	0.85	0.72	-0.46
sp|O43818|U3IP2_HUMAN	NM_001175	0.75	0.914	-0.49
sp|O60381|HBP1_HUMAN	NM_001175	0.7	0.926	-0.38
sp|O60506|HNRPQ_HUMAN	NM_001175	0.75	0.94	-0.4
sp|O60573|IF4E2_HUMAN	NM_001175	0.75	0.746	-0.33
sp|O60812|HNRCL_HUMAN	NM_001175	0.7	0.63	-0.37
sp|O60832|DKC1_HUMAN	NM_001175	0.75	0.973	-0.18
sp|O60870|KIN17_HUMAN	NM_001175	0.7	0.896	-0.32
sp|O60930|RNH1_HUMAN	NM_001175	0.8	0.781	-0.19
sp|O60936|NOL3_HUMAN	NM_001175	0.8	0.765	-0.46
sp|O75319|DUS11_HUMAN	NM_001175	0.7	0.839	-0.7
sp|O75494|SRS10_HUMAN	NM_001175	0.75	0.892	-0.33
sp|O75525|KHDR3_HUMAN	NM_001175	0.75	0.86	-0.6
sp|O75526|RMXL2_HUMAN	NM_001175	0.8	0.968	-0.48
sp|O75569|PRKRA_HUMAN	NM_001175	0.65	0.891	-0.61
sp|O75616|ERAL1_HUMAN	NM_001175	0.8	0.933	-0.34
sp|O75648|MTU1_HUMAN	NM_001175	0.8	0.908	-0.58
sp|O75683|SURF6_HUMAN	NM_001175	0.8	0.912	-0.38
sp|O75792|RNH2A_HUMAN	NM_001175	0.7	0.791	-0.22
sp|P51003|PAPOA_HUMAN	NM_001175	0.85	0.899	-0.52
sp|Q86SG3|DAZ4_HUMAN	NM_001175	0.9	0.826	-0.44
sp|A0AV96|RBM47_HUMAN	NM_001199954	0.9	0.801	0.18
sp|A1L020|MEX3A_HUMAN	NM_001199954	0.8	0.756	0.12
sp|A6NC42|DPPA5_HUMAN	NM_001199954	0.75	0.548	0.77
sp|A6NDE4|RBY1B_HUMAN	NM_001199954	0.75	0.779	0.68
sp|A6NDY0|EPAB2_HUMAN	NM_001199954	0.85	0.68	0.62
sp|A6NFN3|RFOX3_HUMAN	NM_001199954	0.85	0.809	0.68
sp|A6NGQ2|OOEP_HUMAN	NM_001199954	0.75	0.821	1.19
sp|A6NHQ2|FBLL1_HUMAN	NM_001199954	0.85	0.862	0.19
sp|A6NMK7|CPS4L_HUMAN	NM_001199954	0.85	0.748	0.84
sp|A6NMX2|I4E1B_HUMAN	NM_001199954	0.75	0.752	-0.03
sp|A7MD48|SRRM4_HUMAN	NM_001199954	0.85	0.907	0.52
sp|A8MWD9|RUXGL_HUMAN	NM_001199954	0.85	0.979	0.44
sp|A9UHW6|MI4GD_HUMAN	NM_001199954	0.85	0.683	0.05
sp|C9JE40|PATL2_HUMAN	NM_001199954	0.75	0.816	-0.33
sp|O00257|CBX4_HUMAN	NM_001199954	0.85	0.881	0.74
sp|O00425|IF2B3_HUMAN	NM_001199954	0.7	0.817	0.12
sp|O00442|RTCA_HUMAN	NM_001199954	0.8	0.887	0.6
sp|O00571|DDX3X_HUMAN	NM_001199954	0.75	0.757	-0.24
sp|O00584|RNT2_HUMAN	NM_001199954	0.75	0.72	-0.49
sp|O14717|TRDMT_HUMAN	NM_001199954	0.75	0.876	0.48
sp|O14979|HNRDL_HUMAN	NM_001199954	0.85	0.887	-0.22
sp|O15116|LSM1_HUMAN	NM_001199954	0.8	0.715	1.17
sp|O15226|NKRF_HUMAN	NM_001199954	0.7	0.826	0.57
sp|O15234|CASC3_HUMAN	NM_001199954	0.7	0.877	0.18
sp|O43148|MCES_HUMAN	NM_001199954	0.5	0.886	0.18
sp|O43251|RFOX2_HUMAN	NM_001199954	0.85	0.789	-0.12
sp|O43310|CTIF_HUMAN	NM_001199954	0.75	0.865	-0.34
sp|O43347|MSI1H_HUMAN	NM_001199954	0.8	0.649	0.34
sp|O43390|HNRPR_HUMAN	NM_001199954	0.75	0.92	0.48
sp|O43809|CPSF5_HUMAN	NM_001199954	0.75	0.572	-0.01
sp|O43818|U3IP2_HUMAN	NM_001199954	0.85	0.863	-0.17
sp|O60381|HBP1_HUMAN	NM_001199954	0.75	0.786	0.63
sp|O60506|HNRPQ_HUMAN	NM_001199954	0.75	0.879	0.4
sp|O60573|IF4E2_HUMAN	NM_001199954	0.7	0.574	-0.17
sp|O60812|HNRCL_HUMAN	NM_001199954	0.8	0.443	0.1
sp|O60832|DKC1_HUMAN	NM_001199954	0.95	0.922	0.61
sp|O60870|KIN17_HUMAN	NM_001199954	0.8	0.843	0.98
sp|O60930|RNH1_HUMAN	NM_001199954	0.8	0.69	0.42
sp|O60936|NOL3_HUMAN	NM_001199954	0.9	0.81	0.43
sp|O75319|DUS11_HUMAN	NM_001199954	0.75	0.788	0.74
sp|O75494|SRS10_HUMAN	NM_001199954	0.85	0.887	-0.13
sp|O75525|KHDR3_HUMAN	NM_001199954	0.7	0.782	1.16
sp|O75526|RMXL2_HUMAN	NM_001199954	0.75	0.932	0.26
sp|O75569|PRKRA_HUMAN	NM_001199954	0.75	0.793	1.07
sp|O75616|ERAL1_HUMAN	NM_001199954	0.8	0.822	-0.37
sp|O75648|MTU1_HUMAN	NM_001199954	0.7	0.783	-0.44
sp|O75683|SURF6_HUMAN	NM_001199954	0.85	0.904	1.1
sp|O75792|RNH2A_HUMAN	NM_001199954	0.85	0.716	0.06
sp|P51003|PAPOA_HUMAN	NM_001199954	0.85	0.826	0.11
sp|Q86SG3|DAZ4_HUMAN	NM_001199954	0.9	0.72	-0.46
sp|A0AV96|RBM47_HUMAN	NM_001206798	0.75	0.541	0.31
sp|A1L020|MEX3A_HUMAN	NM_001206798	0.8	0.418	0.15
sp|A6NC42|DPPA5_HUMAN	NM_001206798	0.75	0.235	1.11
sp|A6NDE4|RBY1B_HUMAN	NM_001206798	0.6	0.443	0.88
sp|A6NDY0|EPAB2_HUMAN	NM_001206798	0.8	0.317	0.58
sp|A6NFN3|RFOX3_HUMAN	NM_001206798	0.75	0.519	0.95
sp|A6NGQ2|OOEP_HUMAN	NM_001206798	0.7	0.585	1.56
sp|A6NHQ2|FBLL1_HUMAN	NM_001206798	0.8	0.684	0.47
sp|A6NMK7|CPS4L_HUMAN	NM_001206798	0.85	0.517	1.1
sp|A6NMX2|I4E1B_HUMAN	NM_001206798	0.75	0.381	-0.13
sp|A7MD48|SRRM4_HUMAN	NM_001206798	0.75	0.767	0.88
sp|A8MWD9|RUXGL_HUMAN	NM_001206798	0.8	0.947	0.62
sp|A9UHW6|MI4GD_HUMAN	NM_001206798	0.85	0.335	-0.02
sp|C9JE40|PATL2_HUMAN	NM_001206798	0.75	0.503	-0.03
sp|O00257|CBX4_HUMAN	NM_001206798	0.75	0.664	0.93
sp|O00425|IF2B3_HUMAN	NM_001206798	0.75	0.504	0.46
sp|O00442|RTCA_HUMAN	NM_001206798	0.7	0.675	0.76
sp|O00571|DDX3X_HUMAN	NM_001206798	0.7	0.392	-0.31
sp|O00584|RNT2_HUMAN	NM_001206798	0.75	0.409	-0.36
sp|O14717|TRDMT_HUMAN	NM_001206798	0.75	0.651	0.69
sp|O14979|HNRDL_HUMAN	NM_001206798	0.8	0.676	-0.24
sp|O15116|LSM1_HUMAN	NM_001206798	0.65	0.389	1.51
sp|O15226|NKRF_HUMAN	NM_001206798	0.6	0.492	1.36
sp|O15234|CASC3_HUMAN	NM_001206798	0.65	0.637	0.67
sp|O43148|MCES_HUMAN	NM_001206798	0.6	0.623	0.45
sp|O43251|RFOX2_HUMAN	NM_001206798	0.75	0.481	-0.12
sp|O43310|CTIF_HUMAN	NM_001206798	0.55	0.584	-0.01
sp|O43347|MSI1H_HUMAN	NM_001206798	0.85	0.285	0.37
sp|O43390|HNRPR_HUMAN	NM_001206798	0.6	0.75	0.76
sp|O43809|CPSF5_HUMAN	NM_001206798	0.8	0.225	0
sp|O43818|U3IP2_HUMAN	NM_001206798	0.8	0.644	-0.02
sp|O60381|HBP1_HUMAN	NM_001206798	0.65	0.404	0.81
sp|O60506|HNRPQ_HUMAN	NM_001206798	0.7	0.653	0.65
sp|O60573|IF4E2_HUMAN	NM_001206798	0.65	0.219	-0.21
sp|O60812|HNRCL_HUMAN	NM_001206798	0.65	0.154	0.43
sp|O60832|DKC1_HUMAN	NM_001206798	0.8	0.735	0.99
sp|O60870|KIN17_HUMAN	NM_001206798	0.65	0.53	1.18
sp|O60930|RNH1_HUMAN	NM_001206798	0.8	0.356	0.66
sp|O60936|NOL3_HUMAN	NM_001206798	0.75	0.593	0.51
sp|O75319|DUS11_HUMAN	NM_001206798	0.65	0.452	1.11
sp|O75494|SRS10_HUMAN	NM_001206798	0.75	0.746	-0.21
sp|O75525|KHDR3_HUMAN	NM_001206798	0.65	0.443	1.45
sp|O75526|RMXL2_HUMAN	NM_001206798	0.7	0.824	0.25
sp|O75569|PRKRA_HUMAN	NM_001206798	0.65	0.406	1.29
sp|O75616|ERAL1_HUMAN	NM_001206798	0.65	0.47	-0.41
sp|O75648|MTU1_HUMAN	NM_001206798	0.75	0.424	-0.46
sp|O75683|SURF6_HUMAN	NM_001206798	0.8	0.76	1.24
sp|O75792|RNH2A_HUMAN	NM_001206798	0.7	0.36	0.16
sp|P51003|PAPOA_HUMAN	NM_001206798	0.8	0.499	-0.01
sp|Q86SG3|DAZ4_HUMAN	NM_001206798	0.85	0.357	-0.43
sp|A0AV96|RBM47_HUMAN	NM_001207019	0.85	0.427	-0.17
sp|A1L020|MEX3A_HUMAN	NM_001207019	0.7	0.368	-0.36
sp|A6NC42|DPPA5_HUMAN	NM_001207019	0.75	0.167	-0.16
sp|A6NDE4|RBY1B_HUMAN	NM_001207019	0.8	0.455	-0.15
sp|A6NDY0|EPAB2_HUMAN	NM_001207019	0.85	0.285	-0.25
sp|A6NFN3|RFOX3_HUMAN	NM_001207019	0.75	0.469	-0.29
sp|A6NGQ2|OOEP_HUMAN	NM_001207019	0.8	0.486	-0.04
sp|A6NHQ2|FBLL1_HUMAN	NM_001207019	0.8	0.554	-0.1
sp|A6NMK7|CPS4L_HUMAN	NM_001207019	0.75	0.438	-0.13
sp|A6NMX2|I4E1B_HUMAN	NM_001207019	0.65	0.31	-0.43
sp|A7MD48|SRRM4_HUMAN	NM_001207019	0.75	0.71	-0.18
sp|A8MWD9|RUXGL_HUMAN	NM_001207019	0.8	0.906	-0.25
sp|A9UHW6|MI4GD_HUMAN	NM_001207019	0.8	0.257	-0.44
sp|C9JE40|PATL2_HUMAN	NM_001207019	0.8	0.439	-0.32
sp|O00257|CBX4_HUMAN	NM_001207019	0.75	0.561	-0.15
sp|O00425|IF2B3_HUMAN	NM_001207019	0.75	0.44	-0.3
sp|O00442|RTCA_HUMAN	NM_001207019	0.8	0.664	-0.25
sp|O00571|DDX3X_HUMAN	NM_001207019	0.65	0.403	-0.37
sp|O00584|RNT2_HUMAN	NM_001207019	0.75	0.354	-0.45
sp|O14717|TRDMT_HUMAN	NM_001207019	0.75	0.549	-0.23
sp|O14979|HNRDL_HUMAN	NM_001207019	0.75	0.616	-0.38
sp|O15116|LSM1_HUMAN	NM_001207019	0.9	0.296	-0.07
sp|O15226|NKRF_HUMAN	NM_001207019	0.9	0.545	0.55
sp|O15234|CASC3_HUMAN	NM_001207019	0.75	0.592	-0.2
sp|O43148|MCES_HUMAN	NM_001207019	0.75	0.606	-0.32
sp|O43251|RFOX2_HUMAN	NM_001207019	0.8	0.41	-0.44
sp|O43310|CTIF_HUMAN	NM_001207019	0.8	0.619	-0.45
sp|O43347|MSI1H_HUMAN	NM_001207019	0.8	0.273	-0.33
sp|O43390|HNRPR_HUMAN	NM_001207019	0.65	0.726	-0.2
sp|O43809|CPSF5_HUMAN	NM_001207019	0.9	0.188	-0.44
sp|O43818|U3IP2_HUMAN	NM_001207019	0.85	0.532	-0.45
sp|O60381|HBP1_HUMAN	NM_001207019	0.75	0.461	-0.18
sp|O60506|HNRPQ_HUMAN	NM_001207019	0.65	0.587	-0.23
sp|O60573|IF4E2_HUMAN	NM_001207019	0.8	0.211	-0.42
sp|O60812|HNRCL_HUMAN	NM_001207019	0.6	0.153	-0.11
sp|O60832|DKC1_HUMAN	NM_001207019	0.75	0.722	-0.12
sp|O60870|KIN17_HUMAN	NM_001207019	0.65	0.442	-0.09
sp|O60930|RNH1_HUMAN	NM_001207019	0.7	0.323	-0.37
sp|O60936|NOL3_HUMAN	NM_001207019	0.75	0.45	-0.3
sp|O75319|DUS11_HUMAN	NM_001207019	0.75	0.386	-0.26
sp|O75494|SRS10_HUMAN	NM_001207019	0.8	0.656	-0.45
sp|O75525|KHDR3_HUMAN	NM_001207019	0.75	0.412	-0.13
sp|O75526|RMXL2_HUMAN	NM_001207019	0.7	0.804	-0.32
sp|O75569|PRKRA_HUMAN	NM_001207019	0.65	0.402	-0.19
sp|O75616|ERAL1_HUMAN	NM_001207019	0.8	0.455	-0.56
sp|O75648|MTU1_HUMAN	NM_001207019	0.65	0.377	-0.23
sp|O75683|SURF6_HUMAN	NM_001207019	0.8	0.646	-0.08
sp|O75792|RNH2A_HUMAN	NM_001207019	0.7	0.308	-0.44
sp|P51003|PAPOA_HUMAN	NM_001207019	0.7	0.435	0.23
sp|Q86SG3|DAZ4_HUMAN	NM_001207019	0.75	0.293	-0.54
sp|A0AV96|RBM47_HUMAN	NM_001243042	0.85	0.538	-0.73
sp|A1L020|MEX3A_HUMAN	NM_001243042	0.7	0.511	-0.8
sp|A6NC42|DPPA5_HUMAN	NM_001243042	0.75	0.22	-0.56
sp|A6NDE4|RBY1B_HUMAN	NM_001243042	0.65	0.47	-0.98
sp|A6NDY0|EPAB2_HUMAN	NM_001243042	0.65	0.361	-0.48
sp|A6NFN3|RFOX3_HUMAN	NM_001243042	0.8	0.536	-0.85
sp|A6NGQ2|OOEP_HUMAN	NM_001243042	0.65	0.59	-0.33
sp|A6NHQ2|FBLL1_HUMAN	NM_001243042	0.85	0.694	-0.65
sp|A6NMK7|CPS4L_HUMAN	NM_001243042	0.85	0.512	-0.62
sp|A6NMX2|I4E1B_HUMAN	NM_001243042	0.7	0.392	-0.48
sp|A7MD48|SRRM4_HUMAN	NM_001243042	0.85	0.755	-0.82
sp|A8MWD9|RUXGL_HUMAN	NM_001243042	0.75	0.944	-0.7
sp|A9UHW6|MI4GD_HUMAN	NM_001243042	0.8	0.309	-0.62
sp|C9JE40|PATL2_HUMAN	NM_001243042	0.65	0.564	-0.47
sp|O00257|CBX4_HUMAN	NM_001243042	0.85	0.705	-0.95
sp|O00425|IF2B3_HUMAN	NM_001243042	0.8	0.555	-0.74
sp|O00442|RTCA_HUMAN	NM_001243042	0.85	0.782	-1
sp|O00571|DDX3X_HUMAN	NM_001243042	0.7	0.473	-0.21
sp|O00584|RNT2_HUMAN	NM_001243042	0.8	0.46	-0.45
sp|O14717|TRDMT_HUMAN	NM_001243042	0.85	0.656	-0.73
sp|O14979|HNRDL_HUMAN	NM_001243042	0.8	0.727	-0.67
sp|O15116|LSM1_HUMAN	NM_001243042	0.8	0.383	-0.51
sp|O15226|NKRF_HUMAN	NM_001243042	0.7	0.623	-0.5
sp|O15234|CASC3_HUMAN	NM_001243042	0.75	0.718	-0.75
sp|O43148|MCES_HUMAN	NM_001243042	0.65	0.684	-0.52
sp|O43251|RFOX2_HUMAN	NM_001243042	0.9	0.462	-0.77
sp|O43310|CTIF_HUMAN	NM_001243042	0.65	0.699	-0.54
sp|O43347|MSI1H_HUMAN	NM_001243042	0.7	0.305	-0.9
sp|O43390|HNRPR_HUMAN	NM_001243042	0.7	0.844	-0.92
sp|O43809|CPSF5_HUMAN	NM_001243042	0.65	0.247	-0.48
sp|O43818|U3IP2_HUMAN	NM_001243042	0.85	0.659	-0.7
sp|O60381|HBP1_HUMAN	NM_001243042	0.65	0.517	-0.97
sp|O60506|HNRPQ_HUMAN	NM_001243042	0.8	0.736	-0.88
sp|O60573|IF4E2_HUMAN	NM_001243042	0.75	0.257	-0.57
sp|O60812|HNRCL_HUMAN	NM_001243042	0.65	0.176	-0.64
sp|O60832|DKC1_HUMAN	NM_001243042	0.7	0.83	-1.03
sp|O60870|KIN17_HUMAN	NM_001243042	0.7	0.556	-0.92
sp|O60930|RNH1_HUMAN	NM_001243042	0.8	0.386	-0.52
sp|O60936|NOL3_HUMAN	NM_001243042	0.9	0.551	-0.64
sp|O75319|DUS11_HUMAN	NM_001243042	0.7	0.482	-0.99
sp|O75494|SRS10_HUMAN	NM_001243042	0.75	0.721	-0.44
sp|O75525|KHDR3_HUMAN	NM_001243042	0.7	0.486	-1.09
sp|O75526|RMXL2_HUMAN	NM_001243042	0.7	0.887	-0.88
sp|O75569|PRKRA_HUMAN	NM_001243042	0.75	0.495	-0.93
sp|O75616|ERAL1_HUMAN	NM_001243042	0.75	0.592	-0.27
sp|O75648|MTU1_HUMAN	NM_001243042	0.8	0.486	-0.44
sp|O75683|SURF6_HUMAN	NM_001243042	0.9	0.775	-0.91
sp|O75792|RNH2A_HUMAN	NM_001243042	0.75	0.357	-0.47
sp|P51003|PAPOA_HUMAN	NM_001243042	0.85	0.546	-0.1
sp|Q86SG3|DAZ4_HUMAN	NM_001243042	0.9	0.331	-0.62
sp|A0AV96|RBM47_HUMAN	NM_001256799	0.85	0.577	-0.16
sp|A1L020|MEX3A_HUMAN	NM_001256799	0.75	0.522	-0.36
sp|A6NC42|DPPA5_HUMAN	NM_001256799	0.7	0.233	0.01
sp|A6NDE4|RBY1B_HUMAN	NM_001256799	0.7	0.584	-0.2
sp|A6NDY0|EPAB2_HUMAN	NM_001256799	0.75	0.383	0.18
sp|A6NFN3|RFOX3_HUMAN	NM_001256799	0.7	0.593	0.06
sp|A6NGQ2|OOEP_HUMAN	NM_001256799	0.75	0.565	0.31
sp|A6NHQ2|FBLL1_HUMAN	NM_001256799	0.95	0.692	-0.14
sp|A6NMK7|CPS4L_HUMAN	NM_001256799	0.85	0.541	0.08
sp|A6NMX2|I4E1B_HUMAN	NM_001256799	0.7	0.437	-0.03
sp|A7MD48|SRRM4_HUMAN	NM_001256799	0.8	0.768	-0.21
sp|A8MWD9|RUXGL_HUMAN	NM_001256799	0.8	0.941	-0.14
sp|A9UHW6|MI4GD_HUMAN	NM_001256799	0.8	0.382	-0.19
sp|C9JE40|PATL2_HUMAN	NM_001256799	0.8	0.579	-0.31
sp|O00257|CBX4_HUMAN	NM_001256799	0.85	0.689	-0.11
sp|O00425|IF2B3_HUMAN	NM_001256799	0.7	0.614	-0.29
sp|O00442|RTCA_HUMAN	NM_001256799	0.75	0.758	-0.13
sp|O00571|DDX3X_HUMAN	NM_001256799	0.65	0.497	-0.53
sp|O00584|RNT2_HUMAN	NM_001256799	0.65	0.478	-0.24
sp|O14717|TRDMT_HUMAN	NM_001256799	0.7	0.683	-0.12
sp|O14979|HNRDL_HUMAN	NM_001256799	0.8	0.735	-0.38
sp|O15116|LSM1_HUMAN	NM_001256799	0.85	0.401	0.25
sp|O15226|NKRF_HUMAN	NM_001256799	0.6	0.626	-0.34
sp|O15234|CASC3_HUMAN	NM_001256799	0.8	0.708	-0.35
sp|O43148|MCES_HUMAN	NM_001256799	0.6	0.687	-0.27
sp|O43251|RFOX2_HUMAN	NM_001256799	0.85	0.566	-0.37
sp|O43310|CTIF_HUMAN	NM_001256799	0.65	0.679	-0.41
sp|O43347|MSI1H_HUMAN	NM_001256799	0.8	0.369	-0.16
sp|O43390|HNRPR_HUMAN	NM_001256799	0.75	0.795	-0.31
sp|O43809|CPSF5_HUMAN	NM_001256799	0.65	0.314	-0.16
sp|O43818|U3IP2_HUMAN	NM_001256799	0.8	0.674	-0.46
sp|O60381|HBP1_HUMAN	NM_001256799	0.6	0.574	-0.23
sp|O60506|HNRPQ_HUMAN	NM_001256799	0.75	0.718	-0.27
sp|O60573|IF4E2_HUMAN	NM_001256799	0.7	0.324	-0.1
sp|O60812|HNRCL_HUMAN	NM_001256799	0.75	0.199	0
sp|O60832|DKC1_HUMAN	NM_001256799	0.65	0.823	-0.15
sp|O60870|KIN17_HUMAN	NM_001256799	0.7	0.557	0.04
sp|O60930|RNH1_HUMAN	NM_001256799	0.75	0.423	0.34
sp|O60936|NOL3_HUMAN	NM_001256799	0.85	0.552	-0.08
sp|O75319|DUS11_HUMAN	NM_001256799	0.55	0.499	0.05
sp|O75494|SRS10_HUMAN	NM_001256799	0.75	0.742	-0.11
sp|O75525|KHDR3_HUMAN	NM_001256799	0.75	0.545	0.24
sp|O75526|RMXL2_HUMAN	NM_001256799	0.75	0.874	-0.29
sp|O75569|PRKRA_HUMAN	NM_001256799	0.6	0.515	0.33
sp|O75616|ERAL1_HUMAN	NM_001256799	0.55	0.604	-0.58
sp|O75648|MTU1_HUMAN	NM_001256799	0.7	0.544	-0.49
sp|O75683|SURF6_HUMAN	NM_001256799	0.9	0.734	0.16
sp|O75792|RNH2A_HUMAN	NM_001256799	0.6	0.404	0.09
sp|P51003|PAPOA_HUMAN	NM_001256799	0.75	0.557	-0.42
sp|Q86SG3|DAZ4_HUMAN	NM_001256799	0.85	0.417	-0.5
sp|A0AV96|RBM47_HUMAN	NM_001404	0.8	0.463	-0.18
sp|A1L020|MEX3A_HUMAN	NM_001404	0.8	0.438	-0.13
sp|A6NC42|DPPA5_HUMAN	NM_001404	0.8	0.206	0.27
sp|A6NDE4|RBY1B_HUMAN	NM_001404	0.7	0.516	0.15
sp|A6NDY0|EPAB2_HUMAN	NM_001404	0.75	0.315	0.33
sp|A6NFN3|RFOX3_HUMAN	NM_001404	0.75	0.488	0.1
sp|A6NGQ2|OOEP_HUMAN	NM_001404	0.8	0.483	0.61
sp|A6NHQ2|FBLL1_HUMAN	NM_001404	0.85	0.584	-0.3
sp|A6NMK7|CPS4L_HUMAN	NM_001404	0.9	0.473	0.42
sp|A6NMX2|I4E1B_HUMAN	NM_001404	0.7	0.391	-0.01
sp|A7MD48|SRRM4_HUMAN	NM_001404	0.8	0.701	0.18
sp|A8MWD9|RUXGL_HUMAN	NM_001404	0.75	0.918	0.16
sp|A9UHW6|MI4GD_HUMAN	NM_001404	0.8	0.301	-0.1
sp|C9JE40|PATL2_HUMAN	NM_001404	0.75	0.481	-0.28
sp|O00257|CBX4_HUMAN	NM_001404	0.85	0.615	0.27
sp|O00425|IF2B3_HUMAN	NM_001404	0.75	0.543	0.03
sp|O00442|RTCA_HUMAN	NM_001404	0.8	0.696	0.14
sp|O00571|DDX3X_HUMAN	NM_001404	0.7	0.47	-0.45
sp|O00584|RNT2_HUMAN	NM_001404	0.8	0.435	-0.29
sp|O14717|TRDMT_HUMAN	NM_001404	0.85	0.57	0.27
sp|O14979|HNRDL_HUMAN	NM_001404	0.75	0.681	-0.34
sp|O15116|LSM1_HUMAN	NM_001404	0.9	0.353	0.47
sp|O15226|NKRF_HUMAN	NM_001404	0.7	0.625	-0.39
sp|O15234|CASC3_HUMAN	NM_001404	0.75	0.623	-0.42
sp|O43148|MCES_HUMAN	NM_001404	0.6	0.676	0.06
sp|O43251|RFOX2_HUMAN	NM_001404	0.8	0.446	-0.14
sp|O43310|CTIF_HUMAN	NM_001404	0.75	0.659	-0.3
sp|O43347|MSI1H_HUMAN	NM_001404	0.8	0.305	0.04
sp|O43390|HNRPR_HUMAN	NM_001404	0.75	0.753	-0.03
sp|O43809|CPSF5_HUMAN	NM_001404	0.7	0.248	-0.14
sp|O43818|U3IP2_HUMAN	NM_001404	0.8	0.607	-0.29
sp|O60381|HBP1_HUMAN	NM_001404	0.7	0.53	0.13
sp|O60506|HNRPQ_HUMAN	NM_001404	0.8	0.646	-0.06
sp|O60573|IF4E2_HUMAN	NM_001404	0.75	0.264	-0.13
sp|O60812|HNRCL_HUMAN	NM_001404	0.8	0.184	-0.22
sp|O60832|DKC1_HUMAN	NM_001404	0.85	0.781	0.24
sp|O60870|KIN17_HUMAN	NM_001404	0.65	0.56	0.48
sp|O60930|RNH1_HUMAN	NM_001404	0.85	0.393	0.22
sp|O60936|NOL3_HUMAN	NM_001404	0.9	0.455	0.11
sp|O75319|DUS11_HUMAN	NM_001404	0.7	0.474	0.05
sp|O75494|SRS10_HUMAN	NM_001404	0.8	0.637	-0.11
sp|O75525|KHDR3_HUMAN	NM_001404	0.75	0.493	0.43
sp|O75526|RMXL2_HUMAN	NM_001404	0.7	0.823	0.01
sp|O75569|PRKRA_HUMAN	NM_001404	0.7	0.498	0.41
sp|O75616|ERAL1_HUMAN	NM_001404	0.8	0.547	-0.51
sp|O75648|MTU1_HUMAN	NM_001404	0.75	0.496	-0.45
sp|O75683|SURF6_HUMAN	NM_001404	0.85	0.683	0.53
sp|O75792|RNH2A_HUMAN	NM_001404	0.75	0.36	0.01
sp|P51003|PAPOA_HUMAN	NM_001404	0.85	0.496	-0.35
sp|Q86SG3|DAZ4_HUMAN	NM_001404	0.9	0.344	-0.34
sp|A0AV96|RBM47_HUMAN	NM_001428	0.85	0.895	-0.53
sp|A1L020|MEX3A_HUMAN	NM_001428	0.95	0.873	-0.41
sp|A6NC42|DPPA5_HUMAN	NM_001428	0.85	0.711	0.01
sp|A6NDE4|RBY1B_HUMAN	NM_001428	0.75	0.876	-0.17
sp|A6NDY0|EPAB2_HUMAN	NM_001428	0.9	0.801	-0.03
sp|A6NFN3|RFOX3_HUMAN	NM_001428	0.8	0.89	-0.1
sp|A6NGQ2|OOEP_HUMAN	NM_001428	0.8	0.886	0.39
sp|A6NHQ2|FBLL1_HUMAN	NM_001428	0.85	0.922	-0.37
sp|A6NMK7|CPS4L_HUMAN	NM_001428	0.85	0.873	-0.12
sp|A6NMX2|I4E1B_HUMAN	NM_001428	0.85	0.859	-0.3
sp|A7MD48|SRRM4_HUMAN	NM_001428	0.75	0.953	-0.15
sp|A8MWD9|RUXGL_HUMAN	NM_001428	0.9	0.988	-0.23
sp|A9UHW6|MI4GD_HUMAN	NM_001428	0.8	0.806	-0.4
sp|C9JE40|PATL2_HUMAN	NM_001428	0.8	0.896	-0.21
sp|O00257|CBX4_HUMAN	NM_001428	0.95	0.937	-0.17
sp|O00425|IF2B3_HUMAN	NM_001428	0.8	0.898	-0.21
sp|O00442|RTCA_HUMAN	NM_001428	0.85	0.932	-0.3
sp|O00571|DDX3X_HUMAN	NM_001428	0.8	0.863	-0.46
sp|O00584|RNT2_HUMAN	NM_001428	0.9	0.831	-0.35
sp|O14717|TRDMT_HUMAN	NM_001428	0.85	0.923	-0.18
sp|O14979|HNRDL_HUMAN	NM_001428	0.85	0.944	-0.57
sp|O15116|LSM1_HUMAN	NM_001428	0.8	0.842	0.38
sp|O15226|NKRF_HUMAN	NM_001428	0.8	0.905	-0.16
sp|O15234|CASC3_HUMAN	NM_001428	0.7	0.936	-0.25
sp|O43148|MCES_HUMAN	NM_001428	0.85	0.933	-0.23
sp|O43251|RFOX2_HUMAN	NM_001428	0.85	0.884	-0.42
sp|O43310|CTIF_HUMAN	NM_001428	0.75	0.92	-0.34
sp|O43347|MSI1H_HUMAN	NM_001428	0.9	0.804	-0.38
sp|O43390|HNRPR_HUMAN	NM_001428	0.8	0.956	-0.27
sp|O43809|CPSF5_HUMAN	NM_001428	0.75	0.727	-0.19
sp|O43818|U3IP2_HUMAN	NM_001428	0.9	0.932	-0.43
sp|O60381|HBP1_HUMAN	NM_001428	0.75	0.884	-0.22
sp|O60506|HNRPQ_HUMAN	NM_001428	0.85	0.939	-0.21
sp|O60573|IF4E2_HUMAN	NM_001428	0.8	0.718	-0.35
sp|O60812|HNRCL_HUMAN	NM_001428	0.8	0.649	-0.07
sp|O60832|DKC1_HUMAN	NM_001428	0.85	0.959	-0.1
sp|O60870|KIN17_HUMAN	NM_001428	0.85	0.911	-0.1
sp|O60930|RNH1_HUMAN	NM_001428	0.85	0.819	0.18
sp|O60936|NOL3_HUMAN	NM_001428	0.85	0.88	-0.26
sp|O75319|DUS11_HUMAN	NM_001428	0.7	0.859	-0.1
sp|O75494|SRS10_HUMAN	NM_001428	0.75	0.929	-0.29
sp|O75525|KHDR3_HUMAN	NM_001428	0.8	0.872	-0.16
sp|O75526|RMXL2_HUMAN	NM_001428	0.9	0.964	-0.36
sp|O75569|PRKRA_HUMAN	NM_001428	0.75	0.871	-0.05
sp|O75616|ERAL1_HUMAN	NM_001428	0.85	0.9	-0.5
sp|O75648|MTU1_HUMAN	NM_001428	0.8	0.878	-0.63
sp|O75683|SURF6_HUMAN	NM_001428	0.75	0.95	-0.12
sp|O75792|RNH2A_HUMAN	NM_001428	0.8	0.844	-0.05
sp|P51003|PAPOA_HUMAN	NM_001428	0.85	0.889	-0.26
sp|Q86SG3|DAZ4_HUMAN	NM_001428	0.85	0.824	-0.46
sp|A0AV96|RBM47_HUMAN	NM_001636	0.75	0.421	-0.49
sp|A1L020|MEX3A_HUMAN	NM_001636	0.8	0.331	-0.46
sp|A6NC42|DPPA5_HUMAN	NM_001636	0.7	0.223	-0.31
sp|A6NDE4|RBY1B_HUMAN	NM_001636	0.7	0.339	-0.33
sp|A6NDY0|EPAB2_HUMAN	NM_001636	0.8	0.297	-0.36
sp|A6NFN3|RFOX3_HUMAN	NM_001636	0.7	0.396	-0.46
sp|A6NGQ2|OOEP_HUMAN	NM_001636	0.7	0.555	-0.21
sp|A6NHQ2|FBLL1_HUMAN	NM_001636	0.85	0.571	-0.31
sp|A6NMK7|CPS4L_HUMAN	NM_001636	0.8	0.467	-0.3
sp|A6NMX2|I4E1B_HUMAN	NM_001636	0.8	0.316	-0.45
sp|A7MD48|SRRM4_HUMAN	NM_001636	0.8	0.666	-0.37
sp|A8MWD9|RUXGL_HUMAN	NM_001636	0.8	0.92	-0.39
sp|A9UHW6|MI4GD_HUMAN	NM_001636	0.9	0.255	-0.49
sp|C9JE40|PATL2_HUMAN	NM_001636	0.75	0.454	-0.19
sp|O00257|CBX4_HUMAN	NM_001636	0.7	0.579	-0.4
sp|O00425|IF2B3_HUMAN	NM_001636	0.7	0.445	-0.42
sp|O00442|RTCA_HUMAN	NM_001636	0.75	0.613	-0.44
sp|O00571|DDX3X_HUMAN	NM_001636	0.7	0.33	-0.28
sp|O00584|RNT2_HUMAN	NM_001636	0.6	0.389	-0.31
sp|O14717|TRDMT_HUMAN	NM_001636	0.75	0.596	-0.36
sp|O14979|HNRDL_HUMAN	NM_001636	0.75	0.597	-0.59
sp|O15116|LSM1_HUMAN	NM_001636	0.75	0.323	-0.26
sp|O15226|NKRF_HUMAN	NM_001636	0.65	0.47	0.66
sp|O15234|CASC3_HUMAN	NM_001636	0.8	0.544	-0.11
sp|O43148|MCES_HUMAN	NM_001636	0.6	0.594	-0.39
sp|O43251|RFOX2_HUMAN	NM_001636	0.75	0.356	-0.5
sp|O43310|CTIF_HUMAN	NM_001636	0.65	0.573	-0.49
sp|O43347|MSI1H_HUMAN	NM_001636	0.7	0.207	-0.47
sp|O43390|HNRPR_HUMAN	NM_001636	0.85	0.716	-0.33
sp|O43809|CPSF5_HUMAN	NM_001636	0.75	0.201	-0.5
sp|O43818|U3IP2_HUMAN	NM_001636	0.8	0.547	-0.51
sp|O60381|HBP1_HUMAN	NM_001636	0.7	0.348	-0.36
sp|O60506|HNRPQ_HUMAN	NM_001636	0.8	0.592	-0.29
sp|O60573|IF4E2_HUMAN	NM_001636	0.75	0.212	-0.39
sp|O60812|HNRCL_HUMAN	NM_001636	0.7	0.127	-0.13
sp|O60832|DKC1_HUMAN	NM_001636	0.75	0.682	-0.38
sp|O60870|KIN17_HUMAN	NM_001636	0.8	0.52	-0.31
sp|O60930|RNH1_HUMAN	NM_001636	0.75	0.316	-0.22
sp|O60936|NOL3_HUMAN	NM_001636	0.85	0.515	-0.41
sp|O75319|DUS11_HUMAN	NM_001636	0.65	0.41	-0.49
sp|O75494|SRS10_HUMAN	NM_001636	0.8	0.636	-0.47
sp|O75525|KHDR3_HUMAN	NM_001636	0.65	0.396	-0.4
sp|O75526|RMXL2_HUMAN	NM_001636	0.8	0.782	-0.49
sp|O75569|PRKRA_HUMAN	NM_001636	0.85	0.377	-0.4
sp|O75616|ERAL1_HUMAN	NM_001636	0.7	0.414	-0.54
sp|O75648|MTU1_HUMAN	NM_001636	0.75	0.365	-0.48
sp|O75683|SURF6_HUMAN	NM_001636	0.8	0.688	-0.31
sp|O75792|RNH2A_HUMAN	NM_001636	0.75	0.285	-0.29
sp|P51003|PAPOA_HUMAN	NM_001636	0.7	0.439	0.49
sp|Q86SG3|DAZ4_HUMAN	NM_001636	0.85	0.261	-0.54
sp|A0AV96|RBM47_HUMAN	NM_001961	0.75	0.695	0.51
sp|A1L020|MEX3A_HUMAN	NM_001961	0.8	0.566	0.22
sp|A6NC42|DPPA5_HUMAN	NM_001961	0.8	0.373	0.53
sp|A6NDE4|RBY1B_HUMAN	NM_001961	0.75	0.573	0.53
sp|A6NDY0|EPAB2_HUMAN	NM_001961	0.85	0.48	0.61
sp|A6NFN3|RFOX3_HUMAN	NM_001961	0.7	0.662	0.62
sp|A6NGQ2|OOEP_HUMAN	NM_001961	0.7	0.74	0.92
sp|A6NHQ2|FBLL1_HUMAN	NM_001961	0.95	0.818	0.47
sp|A6NMK7|CPS4L_HUMAN	NM_001961	0.85	0.642	0.63
sp|A6NMX2|I4E1B_HUMAN	NM_001961	0.7	0.562	0.3
sp|A7MD48|SRRM4_HUMAN	NM_001961	0.9	0.862	0.28
sp|A8MWD9|RUXGL_HUMAN	NM_001961	0.95	0.97	0.34
sp|A9UHW6|MI4GD_HUMAN	NM_001961	0.8	0.492	0.15
sp|C9JE40|PATL2_HUMAN	NM_001961	0.8	0.677	-0.32
sp|O00257|CBX4_HUMAN	NM_001961	0.85	0.796	0.59
sp|O00425|IF2B3_HUMAN	NM_001961	0.7	0.623	0.03
sp|O00442|RTCA_HUMAN	NM_001961	0.9	0.769	0.53
sp|O00571|DDX3X_HUMAN	NM_001961	0.8	0.504	-0.62
sp|O00584|RNT2_HUMAN	NM_001961	0.75	0.522	-0.06
sp|O14717|TRDMT_HUMAN	NM_001961	0.7	0.786	0.42
sp|O14979|HNRDL_HUMAN	NM_001961	0.75	0.78	-0.01
sp|O15116|LSM1_HUMAN	NM_001961	0.85	0.551	0.87
sp|O15226|NKRF_HUMAN	NM_001961	0.7	0.593	0.88
sp|O15234|CASC3_HUMAN	NM_001961	0.7	0.768	0
sp|O43148|MCES_HUMAN	NM_001961	0.65	0.746	0.05
sp|O43251|RFOX2_HUMAN	NM_001961	0.9	0.636	0.03
sp|O43310|CTIF_HUMAN	NM_001961	0.6	0.715	-0.32
sp|O43347|MSI1H_HUMAN	NM_001961	0.8	0.393	0.43
sp|O43390|HNRPR_HUMAN	NM_001961	0.75	0.848	0.45
sp|O43809|CPSF5_HUMAN	NM_001961	0.75	0.342	0
sp|O43818|U3IP2_HUMAN	NM_001961	0.75	0.769	-0.23
sp|O60381|HBP1_HUMAN	NM_001961	0.65	0.531	0.53
sp|O60506|HNRPQ_HUMAN	NM_001961	0.75	0.786	0.27
sp|O60573|IF4E2_HUMAN	NM_001961	0.65	0.324	0.26
sp|O60812|HNRCL_HUMAN	NM_001961	0.7	0.243	0.5
sp|O60832|DKC1_HUMAN	NM_001961	0.75	0.815	0.41
sp|O60870|KIN17_HUMAN	NM_001961	0.8	0.662	0.82
sp|O60930|RNH1_HUMAN	NM_001961	0.85	0.457	0.75
sp|O60936|NOL3_HUMAN	NM_001961	0.95	0.767	0.33
sp|O75319|DUS11_HUMAN	NM_001961	0.65	0.577	0.7
sp|O75494|SRS10_HUMAN	NM_001961	0.65	0.855	0.09
sp|O75525|KHDR3_HUMAN	NM_001961	0.75	0.551	1.16
sp|O75526|RMXL2_HUMAN	NM_001961	0.65	0.873	0.38
sp|O75569|PRKRA_HUMAN	NM_001961	0.7	0.544	1.17
sp|O75616|ERAL1_HUMAN	NM_001961	0.7	0.608	-0.58
sp|O75648|MTU1_HUMAN	NM_001961	0.6	0.531	-0.05
sp|O75683|SURF6_HUMAN	NM_001961	0.9	0.869	0.96
sp|O75792|RNH2A_HUMAN	NM_001961	0.75	0.495	0.38
sp|P51003|PAPOA_HUMAN	NM_001961	0.8	0.646	0.07
sp|Q86SG3|DAZ4_HUMAN	NM_001961	0.8	0.513	-0.3
sp|A0AV96|RBM47_HUMAN	NM_001970	0.85	0.41	-0.6
sp|A1L020|MEX3A_HUMAN	NM_001970	0.85	0.412	-0.39
sp|A6NC42|DPPA5_HUMAN	NM_001970	0.75	0.153	0.45
sp|A6NDE4|RBY1B_HUMAN	NM_001970	0.75	0.446	0.21
sp|A6NDY0|EPAB2_HUMAN	NM_001970	0.95	0.275	0.43
sp|A6NFN3|RFOX3_HUMAN	NM_001970	0.85	0.44	-0.07
sp|A6NGQ2|OOEP_HUMAN	NM_001970	0.9	0.443	0.96
sp|A6NHQ2|FBLL1_HUMAN	NM_001970	0.95	0.53	-0.78
sp|A6NMK7|CPS4L_HUMAN	NM_001970	0.85	0.458	0.53
sp|A6NMX2|I4E1B_HUMAN	NM_001970	0.8	0.294	-0.03
sp|A7MD48|SRRM4_HUMAN	NM_001970	0.8	0.652	0.22
sp|A8MWD9|RUXGL_HUMAN	NM_001970	0.9	0.922	0.15
sp|A9UHW6|MI4GD_HUMAN	NM_001970	0.9	0.227	-0.1
sp|C9JE40|PATL2_HUMAN	NM_001970	0.75	0.44	-0.16
sp|O00257|CBX4_HUMAN	NM_001970	0.8	0.534	0.11
sp|O00425|IF2B3_HUMAN	NM_001970	0.8	0.499	0.1
sp|O00442|RTCA_HUMAN	NM_001970	0.8	0.716	-0.1
sp|O00571|DDX3X_HUMAN	NM_001970	0.75	0.417	-0.68
sp|O00584|RNT2_HUMAN	NM_001970	0.75	0.374	-0.12
sp|O14717|TRDMT_HUMAN	NM_001970	0.8	0.531	0.29
sp|O14979|HNRDL_HUMAN	NM_001970	0.85	0.653	-0.6
sp|O15116|LSM1_HUMAN	NM_001970	0.85	0.283	0.68
sp|O15226|NKRF_HUMAN	NM_001970	0.7	0.594	-0.03
sp|O15234|CASC3_HUMAN	NM_001970	0.85	0.619	0.12
sp|O43148|MCES_HUMAN	NM_001970	0.7	0.586	0.29
sp|O43251|RFOX2_HUMAN	NM_001970	0.9	0.385	-0.23
sp|O43310|CTIF_HUMAN	NM_001970	0.75	0.627	-0.06
sp|O43347|MSI1H_HUMAN	NM_001970	0.85	0.271	-0.18
sp|O43390|HNRPR_HUMAN	NM_001970	0.9	0.757	0.01
sp|O43809|CPSF5_HUMAN	NM_001970	0.65	0.198	-0.1
sp|O43818|U3IP2_HUMAN	NM_001970	0.9	0.558	-0.3
sp|O60381|HBP1_HUMAN	NM_001970	0.7	0.48	0.12
sp|O60506|HNRPQ_HUMAN	NM_001970	0.85	0.625	0.14
sp|O60573|IF4E2_HUMAN	NM_001970	0.85	0.234	-0.21
sp|O60812|HNRCL_HUMAN	NM_001970	0.85	0.124	-0.42
sp|O60832|DKC1_HUMAN	NM_001970	0.8	0.778	0.31
sp|O60870|KIN17_HUMAN	NM_001970	0.85	0.488	0.29
sp|O60930|RNH1_HUMAN	NM_001970	0.9	0.322	0.03
sp|O60936|NOL3_HUMAN	NM_001970	0.85	0.382	0.14
sp|O75319|DUS11_HUMAN	NM_001970	0.75	0.406	-0.23
sp|O75494|SRS10_HUMAN	NM_001970	0.85	0.571	-0.09
sp|O75525|KHDR3_HUMAN	NM_001970	0.8	0.425	0.09
sp|O75526|RMXL2_HUMAN	NM_001970	0.8	0.86	-0.35
sp|O75569|PRKRA_HUMAN	NM_001970	0.7	0.413	0.14
sp|O75616|ERAL1_HUMAN	NM_001970	0.7	0.506	-0.43
sp|O75648|MTU1_HUMAN	NM_001970	0.8	0.434	-0.65
sp|O75683|SURF6_HUMAN	NM_001970	0.9	0.624	0.34
sp|O75792|RNH2A_HUMAN	NM_001970	0.8	0.279	-0.08
sp|P51003|PAPOA_HUMAN	NM_001970	0.85	0.427	-0.47
sp|Q86SG3|DAZ4_HUMAN	NM_001970	0.95	0.239	-0.28
sp|A0AV96|RBM47_HUMAN	NM_002046	0.7	0.505	-0.16
sp|A1L020|MEX3A_HUMAN	NM_002046	0.85	0.489	-0.36
sp|A6NC42|DPPA5_HUMAN	NM_002046	0.65	0.198	0.01
sp|A6NDE4|RBY1B_HUMAN	NM_002046	0.8	0.6	-0.2
sp|A6NDY0|EPAB2_HUMAN	NM_002046	0.85	0.356	0.18
sp|A6NFN3|RFOX3_HUMAN	NM_002046	0.75	0.553	0.06
sp|A6NGQ2|OOEP_HUMAN	NM_002046	0.8	0.493	0.31
sp|A6NHQ2|FBLL1_HUMAN	NM_002046	0.8	0.609	-0.14
sp|A6NMK7|CPS4L_HUMAN	NM_002046	0.8	0.489	0.08
sp|A6NMX2|I4E1B_HUMAN	NM_002046	0.55	0.402	-0.03
sp|A7MD48|SRRM4_HUMAN	NM_002046	0.65	0.733	-0.21
sp|A8MWD9|RUXGL_HUMAN	NM_002046	0.7	0.915	-0.14
sp|A9UHW6|MI4GD_HUMAN	NM_002046	0.8	0.345	-0.19
sp|C9JE40|PATL2_HUMAN	NM_002046	0.75	0.548	-0.31
sp|O00257|CBX4_HUMAN	NM_002046	0.8	0.623	-0.11
sp|O00425|IF2B3_HUMAN	NM_002046	0.75	0.586	-0.29
sp|O00442|RTCA_HUMAN	NM_002046	0.75	0.741	-0.13
sp|O00571|DDX3X_HUMAN	NM_002046	0.7	0.504	-0.53
sp|O00584|RNT2_HUMAN	NM_002046	0.65	0.456	-0.24
sp|O14717|TRDMT_HUMAN	NM_002046	0.75	0.631	-0.12
sp|O14979|HNRDL_HUMAN	NM_002046	0.7	0.699	-0.38
sp|O15116|LSM1_HUMAN	NM_002046	0.8	0.366	0.25
sp|O15226|NKRF_HUMAN	NM_002046	0.75	0.647	-0.34
sp|O15234|CASC3_HUMAN	NM_002046	0.75	0.68	-0.35
sp|O43148|MCES_HUMAN	NM_002046	0.65	0.675	-0.27
sp|O43251|RFOX2_HUMAN	NM_002046	0.75	0.524	-0.37
sp|O43310|CTIF_HUMAN	NM_002046	0.7	0.689	-0.41
sp|O43347|MSI1H_HUMAN	NM_002046	0.8	0.368	-0.16
sp|O43390|HNRPR_HUMAN	NM_002046	0.8	0.767	-0.31
sp|O43809|CPSF5_HUMAN	NM_002046	0.75	0.306	-0.16
sp|O43818|U3IP2_HUMAN	NM_002046	0.75	0.614	-0.46
sp|O60381|HBP1_HUMAN	NM_002046	0.75	0.614	-0.23
sp|O60506|HNRPQ_HUMAN	NM_002046	0.8	0.678	-0.27
sp|O60573|IF4E2_HUMAN	NM_002046	0.7	0.333	-0.1
sp|O60812|HNRCL_HUMAN	NM_002046	0.65	0.201	0
sp|O60832|DKC1_HUMAN	NM_002046	0.75	0.812	-0.15
sp|O60870|KIN17_HUMAN	NM_002046	0.65	0.529	0.04
sp|O60930|RNH1_HUMAN	NM_002046	0.8	0.4	0.34
sp|O60936|NOL3_HUMAN	NM_002046	0.75	0.461	-0.08
sp|O75319|DUS11_HUMAN	NM_002046	0.65	0.471	0.05
sp|O75494|SRS10_HUMAN	NM_002046	0.6	0.69	-0.11
sp|O75525|KHDR3_HUMAN	NM_002046	0.75	0.521	0.24
sp|O75526|RMXL2_HUMAN	NM_002046	0.75	0.857	-0.29
sp|O75569|PRKRA_HUMAN	NM_002046	0.6	0.516	0.33
sp|O75616|ERAL1_HUMAN	NM_002046	0.75	0.61	-0.58
sp|O75648|MTU1_HUMAN	NM_002046	0.8	0.538	-0.49
sp|O75683|SURF6_HUMAN	NM_002046	0.75	0.659	0.16
sp|O75792|RNH2A_HUMAN	NM_002046	0.6	0.364	0.09
sp|P51003|PAPOA_HUMAN	NM_002046	0.7	0.53	-0.42
sp|Q86SG3|DAZ4_HUMAN	NM_002046	0.75	0.398	-0.5
sp|A0AV96|RBM47_HUMAN	NM_002117	0.85	0.53	-0.73
sp|A1L020|MEX3A_HUMAN	NM_002117	0.7	0.512	-0.8
sp|A6NC42|DPPA5_HUMAN	NM_002117	0.65	0.215	-0.56
sp|A6NDE4|RBY1B_HUMAN	NM_002117	0.65	0.474	-0.98
sp|A6NDY0|EPAB2_HUMAN	NM_002117	0.65	0.359	-0.48
sp|A6NFN3|RFOX3_HUMAN	NM_002117	0.8	0.533	-0.85
sp|A6NGQ2|OOEP_HUMAN	NM_002117	0.65	0.585	-0.33
sp|A6NHQ2|FBLL1_HUMAN	NM_002117	0.85	0.688	-0.65
sp|A6NMK7|CPS4L_HUMAN	NM_002117	0.85	0.504	-0.62
sp|A6NMX2|I4E1B_HUMAN	NM_002117	0.7	0.388	-0.48
sp|A7MD48|SRRM4_HUMAN	NM_002117	0.85	0.751	-0.82
sp|A8MWD9|RUXGL_HUMAN	NM_002117	0.75	0.943	-0.7
sp|A9UHW6|MI4GD_HUMAN	NM_002117	0.8	0.303	-0.62
sp|C9JE40|PATL2_HUMAN	NM_002117	0.65	0.566	-0.47
sp|O00257|CBX4_HUMAN	NM_002117	0.85	0.704	-0.95
sp|O00425|IF2B3_HUMAN	NM_002117	0.8	0.561	-0.74
sp|O00442|RTCA_HUMAN	NM_002117	0.85	0.787	-1
sp|O00571|DDX3X_HUMAN	NM_002117	0.65	0.481	-0.21
sp|O00584|RNT2_HUMAN	NM_002117	0.8	0.462	-0.45
sp|O14717|TRDMT_HUMAN	NM_002117	0.85	0.655	-0.73
sp|O14979|HNRDL_HUMAN	NM_002117	0.8	0.729	-0.67
sp|O15116|LSM1_HUMAN	NM_002117	0.8	0.379	-0.51
sp|O15226|NKRF_HUMAN	NM_002117	0.65	0.632	-0.5
sp|O15234|CASC3_HUMAN	NM_002117	0.75	0.721	-0.75
sp|O43148|MCES_HUMAN	NM_002117	0.55	0.689	-0.52
sp|O43251|RFOX2_HUMAN	NM_002117	0.9	0.456	-0.77
sp|O43310|CTIF_HUMAN	NM_002117	0.55	0.705	-0.54
sp|O43347|MSI1H_HUMAN	NM_002117	0.7	0.306	-0.9
sp|O43390|HNRPR_HUMAN	NM_002117	0.65	0.847	-0.92
sp|O43809|CPSF5_HUMAN	NM_002117	0.65	0.247	-0.48
sp|O43818|U3IP2_HUMAN	NM_002117	0.85	0.657	-0.7
sp|O60381|HBP1_HUMAN	NM_002117	0.65	0.527	-0.97
sp|O60506|HNRPQ_HUMAN	NM_002117	0.8	0.737	-0.88
sp|O60573|IF4E2_HUMAN	NM_002117	0.75	0.26	-0.57
sp|O60812|HNRCL_HUMAN	NM_002117	0.65	0.177	-0.64
sp|O60832|DKC1_HUMAN	NM_002117	0.7	0.834	-1.03
sp|O60870|KIN17_HUMAN	NM_002117	0.7	0.56	-0.92
sp|O60930|RNH1_HUMAN	NM_002117	0.8	0.384	-0.52
sp|O60936|NOL3_HUMAN	NM_002117	0.9	0.54	-0.64
sp|O75319|DUS11_HUMAN	NM_002117	0.7	0.485	-0.99
sp|O75494|SRS10_HUMAN	NM_002117	0.75	0.716	-0.44
sp|O75525|KHDR3_HUMAN	NM_002117	0.7	0.488	-1.09
sp|O75526|RMXL2_HUMAN	NM_002117	0.7	0.89	-0.88
sp|O75569|PRKRA_HUMAN	NM_002117	0.75	0.502	-0.93
sp|O75616|ERAL1_HUMAN	NM_002117	0.75	0.6	-0.27
sp|O75648|MTU1_HUMAN	NM_002117	0.8	0.492	-0.44
sp|O75683|SURF6_HUMAN	NM_002117	0.9	0.77	-0.91
sp|O75792|RNH2A_HUMAN	NM_002117	0.75	0.351	-0.47
sp|P51003|PAPOA_HUMAN	NM_002117	0.85	0.551	-0.1
sp|Q86SG3|DAZ4_HUMAN	NM_002117	0.85	0.328	-0.62
sp|A0AV96|RBM47_HUMAN	NM_002298	0.75	0.896	0.02
sp|A1L020|MEX3A_HUMAN	NM_002298	0.75	0.909	-0.19
sp|A6NC42|DPPA5_HUMAN	NM_002298	0.8	0.579	-0.2
sp|A6NDE4|RBY1B_HUMAN	NM_002298	0.65	0.93	-0.07
sp|A6NDY0|EPAB2_HUMAN	NM_002298	0.8	0.737	0.14
sp|A6NFN3|RFOX3_HUMAN	NM_002298	0.8	0.909	-0.04
sp|A6NGQ2|OOEP_HUMAN	NM_002298	0.85	0.755	0
sp|A6NHQ2|FBLL1_HUMAN	NM_002298	0.65	0.914	0.14
sp|A6NMK7|CPS4L_HUMAN	NM_002298	0.85	0.808	0.04
sp|A6NMX2|I4E1B_HUMAN	NM_002298	0.6	0.86	0.13
sp|A7MD48|SRRM4_HUMAN	NM_002298	0.6	0.963	-0.22
sp|A8MWD9|RUXGL_HUMAN	NM_002298	0.8	0.983	-0.1
sp|A9UHW6|MI4GD_HUMAN	NM_002298	0.75	0.767	-0.12
sp|C9JE40|PATL2_HUMAN	NM_002298	0.7	0.907	-0.17
sp|O00257|CBX4_HUMAN	NM_002298	0.8	0.937	-0.05
sp|O00425|IF2B3_HUMAN	NM_002298	0.7	0.924	-0.24
sp|O00442|RTCA_HUMAN	NM_002298	0.8	0.956	-0.1
sp|O00571|DDX3X_HUMAN	NM_002298	0.75	0.91	-0.15
sp|O00584|RNT2_HUMAN	NM_002298	0.8	0.81	-0.04
sp|O14717|TRDMT_HUMAN	NM_002298	0.8	0.917	-0.02
sp|O14979|HNRDL_HUMAN	NM_002298	0.75	0.963	-0.23
sp|O15116|LSM1_HUMAN	NM_002298	0.85	0.811	-0.12
sp|O15226|NKRF_HUMAN	NM_002298	0.7	0.939	1.15
sp|O15234|CASC3_HUMAN	NM_002298	0.75	0.957	0.01
sp|O43148|MCES_HUMAN	NM_002298	0.6	0.944	-0.2
sp|O43251|RFOX2_HUMAN	NM_002298	0.7	0.914	-0.18
sp|O43310|CTIF_HUMAN	NM_002298	0.8	0.937	-0.38
sp|O43347|MSI1H_HUMAN	NM_002298	0.8	0.863	-0.05
sp|O43390|HNRPR_HUMAN	NM_002298	0.65	0.965	-0.08
sp|O43809|CPSF5_HUMAN	NM_002298	0.75	0.748	-0.24
sp|O43818|U3IP2_HUMAN	NM_002298	0.75	0.942	-0.46
sp|O60381|HBP1_HUMAN	NM_002298	0.7	0.939	-0.11
sp|O60506|HNRPQ_HUMAN	NM_002298	0.75	0.954	-0.1
sp|O60573|IF4E2_HUMAN	NM_002298	0.65	0.775	0.1
sp|O60812|HNRCL_HUMAN	NM_002298	0.6	0.615	0.11
sp|O60832|DKC1_HUMAN	NM_002298	0.65	0.978	-0.17
sp|O60870|KIN17_HUMAN	NM_002298	0.65	0.927	0.08
sp|O60930|RNH1_HUMAN	NM_002298	0.75	0.793	0.28
sp|O60936|NOL3_HUMAN	NM_002298	0.75	0.802	-0.11
sp|O75319|DUS11_HUMAN	NM_002298	0.6	0.876	-0.05
sp|O75494|SRS10_HUMAN	NM_002298	0.65	0.924	-0.04
sp|O75525|KHDR3_HUMAN	NM_002298	0.65	0.875	0.23
sp|O75526|RMXL2_HUMAN	NM_002298	0.85	0.974	-0.09
sp|O75569|PRKRA_HUMAN	NM_002298	0.7	0.908	0.34
sp|O75616|ERAL1_HUMAN	NM_002298	0.75	0.942	-0.16
sp|O75648|MTU1_HUMAN	NM_002298	0.75	0.931	-0.15
sp|O75683|SURF6_HUMAN	NM_002298	0.75	0.944	0.16
sp|O75792|RNH2A_HUMAN	NM_002298	0.7	0.828	0.12
sp|P51003|PAPOA_HUMAN	NM_002298	0.8	0.926	0.54
sp|Q86SG3|DAZ4_HUMAN	NM_002298	0.7	0.871	-0.31
sp|A0AV96|RBM47_HUMAN	NM_002568	0.75	0.954	-0.15
sp|A1L020|MEX3A_HUMAN	NM_002568	0.8	0.969	-0.35
sp|A6NC42|DPPA5_HUMAN	NM_002568	0.7	0.53	0.03
sp|A6NDE4|RBY1B_HUMAN	NM_002568	0.65	0.96	-0.17
sp|A6NDY0|EPAB2_HUMAN	NM_002568	0.7	0.761	0.05
sp|A6NFN3|RFOX3_HUMAN	NM_002568	0.75	0.951	0.11
sp|A6NGQ2|OOEP_HUMAN	NM_002568	0.85	0.737	0.27
sp|A6NHQ2|FBLL1_HUMAN	NM_002568	0.75	0.959	-0.06
sp|A6NMK7|CPS4L_HUMAN	NM_002568	0.85	0.736	0.04
sp|A6NMX2|I4E1B_HUMAN	NM_002568	0.6	0.9	-0.25
sp|A7MD48|SRRM4_HUMAN	NM_002568	0.75	0.98	-0.22
sp|A8MWD9|RUXGL_HUMAN	NM_002568	0.85	0.973	-0.19
sp|A9UHW6|MI4GD_HUMAN	NM_002568	0.8	0.795	-0.28
sp|C9JE40|PATL2_HUMAN	NM_002568	0.75	0.953	-0.39
sp|O00257|CBX4_HUMAN	NM_002568	0.8	0.973	-0.06
sp|O00425|IF2B3_HUMAN	NM_002568	0.8	0.955	-0.43
sp|O00442|RTCA_HUMAN	NM_002568	0.75	0.981	-0.07
sp|O00571|DDX3X_HUMAN	NM_002568	0.65	0.954	-0.23
sp|O00584|RNT2_HUMAN	NM_002568	0.8	0.832	-0.24
sp|O14717|TRDMT_HUMAN	NM_002568	0.9	0.957	-0.2
sp|O14979|HNRDL_HUMAN	NM_002568	0.7	0.984	-0.41
sp|O15116|LSM1_HUMAN	NM_002568	0.85	0.827	0.31
sp|O15226|NKRF_HUMAN	NM_002568	0.85	0.956	-0.08
sp|O15234|CASC3_HUMAN	NM_002568	0.7	0.987	-0.25
sp|O43148|MCES_HUMAN	NM_002568	0.7	0.962	-0.35
sp|O43251|RFOX2_HUMAN	NM_002568	0.75	0.964	-0.45
sp|O43310|CTIF_HUMAN	NM_002568	0.75	0.958	-0.49
sp|O43347|MSI1H_HUMAN	NM_002568	0.75	0.929	-0.18
sp|O43390|HNRPR_HUMAN	NM_002568	0.75	0.986	-0.19
sp|O43809|CPSF5_HUMAN	NM_002568	0.7	0.814	-0.23
sp|O43818|U3IP2_HUMAN	NM_002568	0.9	0.973	-0.46
sp|O60381|HBP1_HUMAN	NM_002568	0.75	0.961	-0.17
sp|O60506|HNRPQ_HUMAN	NM_002568	0.8	0.982	-0.27
sp|O60573|IF4E2_HUMAN	NM_002568	0.75	0.851	-0.3
sp|O60812|HNRCL_HUMAN	NM_002568	0.7	0.682	0
sp|O60832|DKC1_HUMAN	NM_002568	0.7	0.991	-0.26
sp|O60870|KIN17_HUMAN	NM_002568	0.7	0.954	0.05
sp|O60930|RNH1_HUMAN	NM_002568	0.85	0.786	0.2
sp|O60936|NOL3_HUMAN	NM_002568	0.85	0.81	-0.12
sp|O75319|DUS11_HUMAN	NM_002568	0.8	0.91	0.16
sp|O75494|SRS10_HUMAN	NM_002568	0.65	0.96	-0.29
sp|O75525|KHDR3_HUMAN	NM_002568	0.75	0.892	0.29
sp|O75526|RMXL2_HUMAN	NM_002568	0.8	0.989	-0.3
sp|O75569|PRKRA_HUMAN	NM_002568	0.6	0.942	0.33
sp|O75616|ERAL1_HUMAN	NM_002568	0.75	0.977	-0.28
sp|O75648|MTU1_HUMAN	NM_002568	0.85	0.966	-0.24
sp|O75683|SURF6_HUMAN	NM_002568	0.7	0.965	0.17
sp|O75792|RNH2A_HUMAN	NM_002568	0.8	0.832	-0.08
sp|P51003|PAPOA_HUMAN	NM_002568	0.85	0.977	-0.22
sp|Q86SG3|DAZ4_HUMAN	NM_002568	0.75	0.936	-0.47
sp|A0AV96|RBM47_HUMAN	NM_003295	0.95	0.973	0.48
sp|A1L020|MEX3A_HUMAN	NM_003295	0.9	0.973	0.41
sp|A6NC42|DPPA5_HUMAN	NM_003295	0.85	0.858	0.64
sp|A6NDE4|RBY1B_HUMAN	NM_003295	0.8	0.973	0.81
sp|A6NDY0|EPAB2_HUMAN	NM_003295	0.8	0.918	0.79
sp|A6NFN3|RFOX3_HUMAN	NM_003295	0.85	0.974	0.52
sp|A6NGQ2|OOEP_HUMAN	NM_003295	0.85	0.921	1.12
sp|A6NHQ2|FBLL1_HUMAN	NM_003295	0.95	0.977	0.27
sp|A6NMK7|CPS4L_HUMAN	NM_003295	0.8	0.935	0.97
sp|A6NMX2|I4E1B_HUMAN	NM_003295	0.9	0.959	0.42
sp|A7MD48|SRRM4_HUMAN	NM_003295	0.85	0.986	0.68
sp|A8MWD9|RUXGL_HUMAN	NM_003295	0.95	0.994	0.65
sp|A9UHW6|MI4GD_HUMAN	NM_003295	0.9	0.928	0.29
sp|C9JE40|PATL2_HUMAN	NM_003295	0.8	0.964	0.17
sp|O00257|CBX4_HUMAN	NM_003295	0.85	0.981	0.92
sp|O00425|IF2B3_HUMAN	NM_003295	0.85	0.973	0.54
sp|O00442|RTCA_HUMAN	NM_003295	0.75	0.983	0.64
sp|O00571|DDX3X_HUMAN	NM_003295	0.8	0.966	-0.14
sp|O00584|RNT2_HUMAN	NM_003295	0.9	0.924	-0.01
sp|O14717|TRDMT_HUMAN	NM_003295	0.85	0.968	0.8
sp|O14979|HNRDL_HUMAN	NM_003295	0.9	0.987	0.02
sp|O15116|LSM1_HUMAN	NM_003295	0.85	0.939	1.08
sp|O15226|NKRF_HUMAN	NM_003295	0.8	0.975	0.47
sp|O15234|CASC3_HUMAN	NM_003295	0.8	0.983	-0.02
sp|O43148|MCES_HUMAN	NM_003295	0.8	0.979	0.51
sp|O43251|RFOX2_HUMAN	NM_003295	0.85	0.976	0.28
sp|O43310|CTIF_HUMAN	NM_003295	0.8	0.971	-0.07
sp|O43347|MSI1H_HUMAN	NM_003295	0.85	0.954	0.59
sp|O43390|HNRPR_HUMAN	NM_003295	0.85	0.988	0.61
sp|O43809|CPSF5_HUMAN	NM_003295	0.8	0.906	-0.03
sp|O43818|U3IP2_HUMAN	NM_003295	0.9	0.982	-0.07
sp|O60381|HBP1_HUMAN	NM_003295	0.8	0.973	0.83
sp|O60506|HNRPQ_HUMAN	NM_003295	0.9	0.985	0.49
sp|O60573|IF4E2_HUMAN	NM_003295	0.9	0.901	0.33
sp|O60812|HNRCL_HUMAN	NM_003295	0.8	0.846	0.31
sp|O60832|DKC1_HUMAN	NM_003295	0.7	0.99	0.98
sp|O60870|KIN17_HUMAN	NM_003295	0.85	0.972	1.14
sp|O60930|RNH1_HUMAN	NM_003295	0.85	0.941	0.53
sp|O60936|NOL3_HUMAN	NM_003295	0.95	0.944	0.5
sp|O75319|DUS11_HUMAN	NM_003295	0.8	0.954	0.51
sp|O75494|SRS10_HUMAN	NM_003295	0.9	0.973	0.15
sp|O75525|KHDR3_HUMAN	NM_003295	0.9	0.96	1.16
sp|O75526|RMXL2_HUMAN	NM_003295	0.85	0.988	0.61
sp|O75569|PRKRA_HUMAN	NM_003295	0.8	0.966	1.15
sp|O75616|ERAL1_HUMAN	NM_003295	0.8	0.977	-0.28
sp|O75648|MTU1_HUMAN	NM_003295	0.85	0.973	0.04
sp|O75683|SURF6_HUMAN	NM_003295	0.9	0.982	1.21
sp|O75792|RNH2A_HUMAN	NM_003295	0.75	0.955	0.26
sp|P51003|PAPOA_HUMAN	NM_003295	0.85	0.971	0.25
sp|Q86SG3|DAZ4_HUMAN	NM_003295	0.8	0.961	0
sp|A0AV96|RBM47_HUMAN	NM_004559	0.9	0.981	0.6
sp|A1L020|MEX3A_HUMAN	NM_004559	0.85	0.978	0.31
sp|A6NC42|DPPA5_HUMAN	NM_004559	0.85	0.855	0.74
sp|A6NDE4|RBY1B_HUMAN	NM_004559	0.75	0.972	0.67
sp|A6NDY0|EPAB2_HUMAN	NM_004559	0.85	0.924	0.9
sp|A6NFN3|RFOX3_HUMAN	NM_004559	0.85	0.977	0.82
sp|A6NGQ2|OOEP_HUMAN	NM_004559	0.85	0.943	1.1
sp|A6NHQ2|FBLL1_HUMAN	NM_004559	0.8	0.986	0.55
sp|A6NMK7|CPS4L_HUMAN	NM_004559	0.85	0.933	0.93
sp|A6NMX2|I4E1B_HUMAN	NM_004559	0.8	0.968	0.5
sp|A7MD48|SRRM4_HUMAN	NM_004559	0.75	0.991	0.56
sp|A8MWD9|RUXGL_HUMAN	NM_004559	0.9	0.997	0.54
sp|A9UHW6|MI4GD_HUMAN	NM_004559	0.85	0.935	0.31
sp|C9JE40|PATL2_HUMAN	NM_004559	0.65	0.976	0.32
sp|O00257|CBX4_HUMAN	NM_004559	0.85	0.989	0.79
sp|O00425|IF2B3_HUMAN	NM_004559	0.75	0.977	0.21
sp|O00442|RTCA_HUMAN	NM_004559	0.85	0.986	0.7
sp|O00571|DDX3X_HUMAN	NM_004559	0.7	0.969	-0.12
sp|O00584|RNT2_HUMAN	NM_004559	0.75	0.927	0.06
sp|O14717|TRDMT_HUMAN	NM_004559	0.85	0.981	0.63
sp|O14979|HNRDL_HUMAN	NM_004559	0.8	0.99	0.06
sp|O15116|LSM1_HUMAN	NM_004559	0.75	0.947	1.19
sp|O15226|NKRF_HUMAN	NM_004559	0.8	0.974	1.07
sp|O15234|CASC3_HUMAN	NM_004559	0.7	0.989	0.36
sp|O43148|MCES_HUMAN	NM_004559	0.6	0.983	0.23
sp|O43251|RFOX2_HUMAN	NM_004559	0.9	0.98	0.13
sp|O43310|CTIF_HUMAN	NM_004559	0.7	0.976	-0.16
sp|O43347|MSI1H_HUMAN	NM_004559	0.75	0.955	0.59
sp|O43390|HNRPR_HUMAN	NM_004559	0.8	0.992	0.55
sp|O43809|CPSF5_HUMAN	NM_004559	0.85	0.909	0.14
sp|O43818|U3IP2_HUMAN	NM_004559	0.85	0.987	-0.16
sp|O60381|HBP1_HUMAN	NM_004559	0.75	0.971	0.67
sp|O60506|HNRPQ_HUMAN	NM_004559	0.8	0.99	0.4
sp|O60573|IF4E2_HUMAN	NM_004559	0.7	0.901	0.43
sp|O60812|HNRCL_HUMAN	NM_004559	0.75	0.839	0.6
sp|O60832|DKC1_HUMAN	NM_004559	0.85	0.992	0.65
sp|O60870|KIN17_HUMAN	NM_004559	0.8	0.979	1.07
sp|O60930|RNH1_HUMAN	NM_004559	0.85	0.932	0.99
sp|O60936|NOL3_HUMAN	NM_004559	0.85	0.968	0.54
sp|O75319|DUS11_HUMAN	NM_004559	0.7	0.96	0.97
sp|O75494|SRS10_HUMAN	NM_004559	0.75	0.984	0.25
sp|O75525|KHDR3_HUMAN	NM_004559	0.8	0.958	1.44
sp|O75526|RMXL2_HUMAN	NM_004559	0.85	0.992	0.52
sp|O75569|PRKRA_HUMAN	NM_004559	0.75	0.971	1.46
sp|O75616|ERAL1_HUMAN	NM_004559	0.85	0.981	-0.37
sp|O75648|MTU1_HUMAN	NM_004559	0.7	0.976	-0.01
sp|O75683|SURF6_HUMAN	NM_004559	0.8	0.99	1.25
sp|O75792|RNH2A_HUMAN	NM_004559	0.85	0.955	0.56
sp|P51003|PAPOA_HUMAN	NM_004559	0.8	0.98	0.62
sp|Q86SG3|DAZ4_HUMAN	NM_004559	0.85	0.962	-0.25
sp|A0AV96|RBM47_HUMAN	NM_005720	0.8	0.607	-0.76
sp|A1L020|MEX3A_HUMAN	NM_005720	0.8	0.655	-0.69
sp|A6NC42|DPPA5_HUMAN	NM_005720	0.7	0.21	-0.45
sp|A6NDE4|RBY1B_HUMAN	NM_005720	0.7	0.664	-0.79
sp|A6NDY0|EPAB2_HUMAN	NM_005720	0.7	0.398	-0.31
sp|A6NFN3|RFOX3_HUMAN	NM_005720	0.8	0.639	-0.67
sp|A6NGQ2|OOEP_HUMAN	NM_005720	0.7	0.551	-0.3
sp|A6NHQ2|FBLL1_HUMAN	NM_005720	0.9	0.73	-0.67
sp|A6NMK7|CPS4L_HUMAN	NM_005720	0.85	0.526	-0.39
sp|A6NMX2|I4E1B_HUMAN	NM_005720	0.65	0.446	-0.18
sp|A7MD48|SRRM4_HUMAN	NM_005720	0.8	0.805	-0.55
sp|A8MWD9|RUXGL_HUMAN	NM_005720	0.8	0.947	-0.47
sp|A9UHW6|MI4GD_HUMAN	NM_005720	0.8	0.341	-0.45
sp|C9JE40|PATL2_HUMAN	NM_005720	0.7	0.655	-0.34
sp|O00257|CBX4_HUMAN	NM_005720	0.85	0.785	-0.6
sp|O00425|IF2B3_HUMAN	NM_005720	0.75	0.727	-0.46
sp|O00442|RTCA_HUMAN	NM_005720	0.75	0.877	-0.66
sp|O00571|DDX3X_HUMAN	NM_005720	0.65	0.656	-0.17
sp|O00584|RNT2_HUMAN	NM_005720	0.75	0.554	-0.2
sp|O14717|TRDMT_HUMAN	NM_005720	0.8	0.724	-0.4
sp|O14979|HNRDL_HUMAN	NM_005720	0.8	0.853	-0.65
sp|O15116|LSM1_HUMAN	NM_005720	0.75	0.405	-0.47
sp|O15226|NKRF_HUMAN	NM_005720	0.65	0.781	-0.08
sp|O15234|CASC3_HUMAN	NM_005720	0.75	0.825	-0.65
sp|O43148|MCES_HUMAN	NM_005720	0.7	0.783	-0.35
sp|O43251|RFOX2_HUMAN	NM_005720	0.75	0.561	-0.49
sp|O43310|CTIF_HUMAN	NM_005720	0.75	0.789	-0.44
sp|O43347|MSI1H_HUMAN	NM_005720	0.75	0.429	-0.59
sp|O43390|HNRPR_HUMAN	NM_005720	0.7	0.908	-0.85
sp|O43809|CPSF5_HUMAN	NM_005720	0.85	0.329	-0.44
sp|O43818|U3IP2_HUMAN	NM_005720	0.85	0.784	-0.58
sp|O60381|HBP1_HUMAN	NM_005720	0.6	0.683	-0.8
sp|O60506|HNRPQ_HUMAN	NM_005720	0.75	0.837	-0.82
sp|O60573|IF4E2_HUMAN	NM_005720	0.8	0.405	-0.3
sp|O60812|HNRCL_HUMAN	NM_005720	0.65	0.226	-0.5
sp|O60832|DKC1_HUMAN	NM_005720	0.8	0.924	-0.63
sp|O60870|KIN17_HUMAN	NM_005720	0.65	0.746	-0.5
sp|O60930|RNH1_HUMAN	NM_005720	0.8	0.486	-0.38
sp|O60936|NOL3_HUMAN	NM_005720	0.75	0.48	-0.47
sp|O75319|DUS11_HUMAN	NM_005720	0.75	0.623	-0.79
sp|O75494|SRS10_HUMAN	NM_005720	0.75	0.729	-0.24
sp|O75525|KHDR3_HUMAN	NM_005720	0.65	0.606	-0.68
sp|O75526|RMXL2_HUMAN	NM_005720	0.75	0.946	-0.64
sp|O75569|PRKRA_HUMAN	NM_005720	0.7	0.642	-0.62
sp|O75616|ERAL1_HUMAN	NM_005720	0.75	0.753	-0.31
sp|O75648|MTU1_HUMAN	NM_005720	0.8	0.7	-0.38
sp|O75683|SURF6_HUMAN	NM_005720	0.85	0.832	-0.52
sp|O75792|RNH2A_HUMAN	NM_005720	0.75	0.406	-0.31
sp|P51003|PAPOA_HUMAN	NM_005720	0.85	0.719	0.29
sp|Q86SG3|DAZ4_HUMAN	NM_005720	0.8	0.429	-0.4
sp|A0AV96|RBM47_HUMAN	NM_006082	0.85	0.776	-0.76
sp|A1L020|MEX3A_HUMAN	NM_006082	0.9	0.759	-0.74
sp|A6NC42|DPPA5_HUMAN	NM_006082	0.8	0.534	-0.21
sp|A6NDE4|RBY1B_HUMAN	NM_006082	0.7	0.765	-0.74
sp|A6NDY0|EPAB2_HUMAN	NM_006082	0.8	0.686	-0.25
sp|A6NFN3|RFOX3_HUMAN	NM_006082	0.85	0.787	-0.6
sp|A6NGQ2|OOEP_HUMAN	NM_006082	0.85	0.789	0.06
sp|A6NHQ2|FBLL1_HUMAN	NM_006082	0.9	0.832	-0.75
sp|A6NMK7|CPS4L_HUMAN	NM_006082	0.95	0.755	-0.22
sp|A6NMX2|I4E1B_HUMAN	NM_006082	0.8	0.738	-0.43
sp|A7MD48|SRRM4_HUMAN	NM_006082	0.75	0.865	-0.4
sp|A8MWD9|RUXGL_HUMAN	NM_006082	0.85	0.967	-0.37
sp|A9UHW6|MI4GD_HUMAN	NM_006082	0.95	0.652	-0.48
sp|C9JE40|PATL2_HUMAN	NM_006082	0.8	0.798	-0.4
sp|O00257|CBX4_HUMAN	NM_006082	0.85	0.861	-0.52
sp|O00425|IF2B3_HUMAN	NM_006082	0.75	0.817	-0.42
sp|O00442|RTCA_HUMAN	NM_006082	0.85	0.873	-0.62
sp|O00571|DDX3X_HUMAN	NM_006082	0.8	0.754	-0.27
sp|O00584|RNT2_HUMAN	NM_006082	0.7	0.717	-0.28
sp|O14717|TRDMT_HUMAN	NM_006082	0.8	0.84	-0.36
sp|O14979|HNRDL_HUMAN	NM_006082	0.85	0.873	-0.66
sp|O15116|LSM1_HUMAN	NM_006082	0.9	0.676	-0.14
sp|O15226|NKRF_HUMAN	NM_006082	0.65	0.822	-1.02
sp|O15234|CASC3_HUMAN	NM_006082	0.75	0.858	-0.93
sp|O43148|MCES_HUMAN	NM_006082	0.6	0.859	-0.26
sp|O43251|RFOX2_HUMAN	NM_006082	0.85	0.769	-0.57
sp|O43310|CTIF_HUMAN	NM_006082	0.7	0.85	-0.38
sp|O43347|MSI1H_HUMAN	NM_006082	0.85	0.641	-0.61
sp|O43390|HNRPR_HUMAN	NM_006082	0.8	0.904	-0.8
sp|O43809|CPSF5_HUMAN	NM_006082	0.85	0.61	-0.44
sp|O43818|U3IP2_HUMAN	NM_006082	0.85	0.84	-0.54
sp|O60381|HBP1_HUMAN	NM_006082	0.7	0.772	-0.75
sp|O60506|HNRPQ_HUMAN	NM_006082	0.85	0.863	-0.75
sp|O60573|IF4E2_HUMAN	NM_006082	0.7	0.551	-0.42
sp|O60812|HNRCL_HUMAN	NM_006082	0.85	0.456	-0.57
sp|O60832|DKC1_HUMAN	NM_006082	0.75	0.914	-0.5
sp|O60870|KIN17_HUMAN	NM_006082	0.65	0.805	-0.42
sp|O60930|RNH1_HUMAN	NM_006082	0.85	0.684	-0.51
sp|O60936|NOL3_HUMAN	NM_006082	0.85	0.763	-0.38
sp|O75319|DUS11_HUMAN	NM_006082	0.75	0.746	-0.72
sp|O75494|SRS10_HUMAN	NM_006082	0.8	0.838	-0.44
sp|O75525|KHDR3_HUMAN	NM_006082	0.85	0.771	-0.65
sp|O75526|RMXL2_HUMAN	NM_006082	0.8	0.925	-0.7
sp|O75569|PRKRA_HUMAN	NM_006082	0.85	0.786	-0.6
sp|O75616|ERAL1_HUMAN	NM_006082	0.8	0.816	-0.2
sp|O75648|MTU1_HUMAN	NM_006082	0.75	0.772	-0.52
sp|O75683|SURF6_HUMAN	NM_006082	0.9	0.869	-0.43
sp|O75792|RNH2A_HUMAN	NM_006082	0.85	0.697	-0.45
sp|P51003|PAPOA_HUMAN	NM_006082	0.9	0.778	-0.64
sp|Q86SG3|DAZ4_HUMAN	NM_006082	0.95	0.673	-0.47
sp|A0AV96|RBM47_HUMAN	NM_006098	0.85	0.604	2.67
sp|A1L020|MEX3A_HUMAN	NM_006098	0.85	0.679	1.27
sp|A6NC42|DPPA5_HUMAN	NM_006098	0.9	0.374	-0.69
sp|A6NDE4|RBY1B_HUMAN	NM_006098	0.85	0.784	1.38
sp|A6NDY0|EPAB2_HUMAN	NM_006098	0.75	0.54	-0.1
sp|A6NFN3|RFOX3_HUMAN	NM_006098	0.75	0.704	0.33
sp|A6NGQ2|OOEP_HUMAN	NM_006098	0.9	0.632	-0.34
sp|A6NHQ2|FBLL1_HUMAN	NM_006098	0.85	0.649	-0.28
sp|A6NMK7|CPS4L_HUMAN	NM_006098	0.9	0.622	0.47
sp|A6NMX2|I4E1B_HUMAN	NM_006098	0.7	0.62	-0.27
sp|A7MD48|SRRM4_HUMAN	NM_006098	0.9	0.838	1.59
sp|A8MWD9|RUXGL_HUMAN	NM_006098	0.8	0.947	0.1
sp|A9UHW6|MI4GD_HUMAN	NM_006098	0.9	0.492	-0.22
sp|C9JE40|PATL2_HUMAN	NM_006098	0.85	0.763	0.66
sp|O00257|CBX4_HUMAN	NM_006098	0.9	0.781	2.65
sp|O00425|IF2B3_HUMAN	NM_006098	0.8	0.792	2.24
sp|O00442|RTCA_HUMAN	NM_006098	0.8	0.869	0.71
sp|O00571|DDX3X_HUMAN	NM_006098	0.85	0.77	2.1
sp|O00584|RNT2_HUMAN	NM_006098	0.85	0.673	-0.79
sp|O14717|TRDMT_HUMAN	NM_006098	0.85	0.8	-0.7
sp|O14979|HNRDL_HUMAN	NM_006098	0.85	0.851	-0.99
sp|O15116|LSM1_HUMAN	NM_006098	0.85	0.571	-0.45
sp|O15226|NKRF_HUMAN	NM_006098	0.75	0.86	3.66
sp|O15234|CASC3_HUMAN	NM_006098	0.85	0.838	2.08
sp|O43148|MCES_HUMAN	NM_006098	0.75	0.86	0.97
sp|O43251|RFOX2_HUMAN	NM_006098	0.8	0.661	-0.28
sp|O43310|CTIF_HUMAN	NM_006098	0.85	0.872	1.35
sp|O43347|MSI1H_HUMAN	NM_006098	0.85	0.612	0.42
sp|O43390|HNRPR_HUMAN	NM_006098	0.8	0.88	1.06
sp|O43809|CPSF5_HUMAN	NM_006098	0.85	0.524	-0.83
sp|O43818|U3IP2_HUMAN	NM_006098	0.9	0.763	-0.22
sp|O60381|HBP1_HUMAN	NM_006098	0.75	0.845	2.3
sp|O60506|HNRPQ_HUMAN	NM_006098	0.85	0.8	0.9
sp|O60573|IF4E2_HUMAN	NM_006098	0.75	0.567	-0.33
sp|O60812|HNRCL_HUMAN	NM_006098	0.7	0.362	0.44
sp|O60832|DKC1_HUMAN	NM_006098	0.8	0.922	3.2
sp|O60870|KIN17_HUMAN	NM_006098	0.8	0.816	0.48
sp|O60930|RNH1_HUMAN	NM_006098	0.7	0.582	0.03
sp|O60936|NOL3_HUMAN	NM_006098	0.85	0.524	-0.38
sp|O75319|DUS11_HUMAN	NM_006098	0.65	0.718	0.1
sp|O75494|SRS10_HUMAN	NM_006098	0.7	0.731	-0.81
sp|O75525|KHDR3_HUMAN	NM_006098	0.65	0.729	0.64
sp|O75526|RMXL2_HUMAN	NM_006098	0.8	0.923	0.11
sp|O75569|PRKRA_HUMAN	NM_006098	0.85	0.795	0.53
sp|O75616|ERAL1_HUMAN	NM_006098	0.75	0.835	-1.29
sp|O75648|MTU1_HUMAN	NM_006098	0.9	0.787	-0.59
sp|O75683|SURF6_HUMAN	NM_006098	0.85	0.76	0.89
sp|O75792|RNH2A_HUMAN	NM_006098	0.75	0.564	0.01
sp|P51003|PAPOA_HUMAN	NM_006098	0.9	0.792	2.85
sp|Q86SG3|DAZ4_HUMAN	NM_006098	0.85	0.613	0.89
sp|A0AV96|RBM47_HUMAN	NM_006325	0.9	0.961	-0.1
sp|A1L020|MEX3A_HUMAN	NM_006325	0.85	0.971	-0.23
sp|A6NC42|DPPA5_HUMAN	NM_006325	0.85	0.746	0.46
sp|A6NDE4|RBY1B_HUMAN	NM_006325	0.75	0.975	0.24
sp|A6NDY0|EPAB2_HUMAN	NM_006325	0.85	0.866	0.48
sp|A6NFN3|RFOX3_HUMAN	NM_006325	0.8	0.965	0.43
sp|A6NGQ2|OOEP_HUMAN	NM_006325	0.9	0.848	0.94
sp|A6NHQ2|FBLL1_HUMAN	NM_006325	0.9	0.961	-0.02
sp|A6NMK7|CPS4L_HUMAN	NM_006325	0.9	0.855	0.45
sp|A6NMX2|I4E1B_HUMAN	NM_006325	0.8	0.948	-0.01
sp|A7MD48|SRRM4_HUMAN	NM_006325	0.8	0.985	0.26
sp|A8MWD9|RUXGL_HUMAN	NM_006325	0.9	0.989	0.13
sp|A9UHW6|MI4GD_HUMAN	NM_006325	0.9	0.888	-0.1
sp|C9JE40|PATL2_HUMAN	NM_006325	0.8	0.967	-0.21
sp|O00257|CBX4_HUMAN	NM_006325	0.85	0.974	0.31
sp|O00425|IF2B3_HUMAN	NM_006325	0.75	0.97	0.03
sp|O00442|RTCA_HUMAN	NM_006325	0.8	0.984	0.12
sp|O00571|DDX3X_HUMAN	NM_006325	0.7	0.966	-0.37
sp|O00584|RNT2_HUMAN	NM_006325	0.95	0.894	-0.31
sp|O14717|TRDMT_HUMAN	NM_006325	0.95	0.968	0.16
sp|O14979|HNRDL_HUMAN	NM_006325	0.8	0.985	-0.42
sp|O15116|LSM1_HUMAN	NM_006325	0.85	0.91	0.92
sp|O15226|NKRF_HUMAN	NM_006325	0.85	0.973	-0.2
sp|O15234|CASC3_HUMAN	NM_006325	0.8	0.986	-0.1
sp|O43148|MCES_HUMAN	NM_006325	0.75	0.975	0.04
sp|O43251|RFOX2_HUMAN	NM_006325	0.8	0.973	-0.31
sp|O43310|CTIF_HUMAN	NM_006325	0.85	0.974	-0.25
sp|O43347|MSI1H_HUMAN	NM_006325	0.85	0.954	-0.04
sp|O43390|HNRPR_HUMAN	NM_006325	0.75	0.987	0.05
sp|O43809|CPSF5_HUMAN	NM_006325	0.85	0.89	0.03
sp|O43818|U3IP2_HUMAN	NM_006325	0.85	0.974	-0.27
sp|O60381|HBP1_HUMAN	NM_006325	0.8	0.978	0.18
sp|O60506|HNRPQ_HUMAN	NM_006325	0.8	0.982	0.08
sp|O60573|IF4E2_HUMAN	NM_006325	0.8	0.902	-0.14
sp|O60812|HNRCL_HUMAN	NM_006325	0.8	0.764	0.19
sp|O60832|DKC1_HUMAN	NM_006325	0.75	0.991	0.34
sp|O60870|KIN17_HUMAN	NM_006325	0.65	0.971	0.46
sp|O60930|RNH1_HUMAN	NM_006325	0.9	0.886	0.65
sp|O60936|NOL3_HUMAN	NM_006325	0.95	0.886	0.17
sp|O75319|DUS11_HUMAN	NM_006325	0.75	0.952	0.45
sp|O75494|SRS10_HUMAN	NM_006325	0.8	0.967	-0.06
sp|O75525|KHDR3_HUMAN	NM_006325	0.85	0.943	0.63
sp|O75526|RMXL2_HUMAN	NM_006325	0.85	0.987	-0.13
sp|O75569|PRKRA_HUMAN	NM_006325	0.7	0.97	0.72
sp|O75616|ERAL1_HUMAN	NM_006325	0.75	0.983	-0.34
sp|O75648|MTU1_HUMAN	NM_006325	0.85	0.975	-0.51
sp|O75683|SURF6_HUMAN	NM_006325	0.85	0.971	0.51
sp|O75792|RNH2A_HUMAN	NM_006325	0.8	0.922	0.24
sp|P51003|PAPOA_HUMAN	NM_006325	0.85	0.982	-0.54
sp|Q86SG3|DAZ4_HUMAN	NM_006325	0.85	0.964	-0.48
sp|A0AV96|RBM47_HUMAN	NM_006597	0.85	0.912	-0.2
sp|A1L020|MEX3A_HUMAN	NM_006597	0.8	0.903	-0.24
sp|A6NC42|DPPA5_HUMAN	NM_006597	0.85	0.726	-0.19
sp|A6NDE4|RBY1B_HUMAN	NM_006597	0.75	0.928	-0.12
sp|A6NDY0|EPAB2_HUMAN	NM_006597	0.85	0.806	-0.13
sp|A6NFN3|RFOX3_HUMAN	NM_006597	0.95	0.92	-0.19
sp|A6NGQ2|OOEP_HUMAN	NM_006597	0.95	0.85	-0.09
sp|A6NHQ2|FBLL1_HUMAN	NM_006597	0.85	0.929	-0.27
sp|A6NMK7|CPS4L_HUMAN	NM_006597	1	0.867	-0.06
sp|A6NMX2|I4E1B_HUMAN	NM_006597	0.8	0.887	-0.22
sp|A7MD48|SRRM4_HUMAN	NM_006597	0.85	0.966	-0.17
sp|A8MWD9|RUXGL_HUMAN	NM_006597	0.95	0.986	-0.17
sp|A9UHW6|MI4GD_HUMAN	NM_006597	0.85	0.828	-0.29
sp|C9JE40|PATL2_HUMAN	NM_006597	0.85	0.906	-0.31
sp|O00257|CBX4_HUMAN	NM_006597	0.85	0.945	-0.08
sp|O00425|IF2B3_HUMAN	NM_006597	0.9	0.924	-0.23
sp|O00442|RTCA_HUMAN	NM_006597	0.85	0.952	-0.16
sp|O00571|DDX3X_HUMAN	NM_006597	0.8	0.911	-0.31
sp|O00584|RNT2_HUMAN	NM_006597	0.9	0.842	-0.29
sp|O14717|TRDMT_HUMAN	NM_006597	0.85	0.925	-0.11
sp|O14979|HNRDL_HUMAN	NM_006597	0.85	0.959	-0.36
sp|O15116|LSM1_HUMAN	NM_006597	1	0.855	-0.14
sp|O15226|NKRF_HUMAN	NM_006597	0.95	0.939	-0.17
sp|O15234|CASC3_HUMAN	NM_006597	0.8	0.948	-0.45
sp|O43148|MCES_HUMAN	NM_006597	0.75	0.951	-0.26
sp|O43251|RFOX2_HUMAN	NM_006597	0.9	0.922	-0.28
sp|O43310|CTIF_HUMAN	NM_006597	0.8	0.941	-0.45
sp|O43347|MSI1H_HUMAN	NM_006597	0.95	0.871	-0.18
sp|O43390|HNRPR_HUMAN	NM_006597	0.8	0.964	-0.18
sp|O43809|CPSF5_HUMAN	NM_006597	0.7	0.779	-0.38
sp|O43818|U3IP2_HUMAN	NM_006597	0.85	0.944	-0.42
sp|O60381|HBP1_HUMAN	NM_006597	0.85	0.934	-0.12
sp|O60506|HNRPQ_HUMAN	NM_006597	0.85	0.952	-0.23
sp|O60573|IF4E2_HUMAN	NM_006597	0.85	0.788	-0.24
sp|O60812|HNRCL_HUMAN	NM_006597	0.85	0.689	-0.24
sp|O60832|DKC1_HUMAN	NM_006597	0.6	0.972	-0.1
sp|O60870|KIN17_HUMAN	NM_006597	0.75	0.934	0.02
sp|O60930|RNH1_HUMAN	NM_006597	0.95	0.857	-0.09
sp|O60936|NOL3_HUMAN	NM_006597	0.85	0.861	-0.22
sp|O75319|DUS11_HUMAN	NM_006597	0.8	0.899	-0.19
sp|O75494|SRS10_HUMAN	NM_006597	0.8	0.935	-0.32
sp|O75525|KHDR3_HUMAN	NM_006597	0.9	0.905	0.04
sp|O75526|RMXL2_HUMAN	NM_006597	0.85	0.967	-0.15
sp|O75569|PRKRA_HUMAN	NM_006597	0.85	0.915	0.03
sp|O75616|ERAL1_HUMAN	NM_006597	0.8	0.932	-0.23
sp|O75648|MTU1_HUMAN	NM_006597	0.8	0.92	-0.32
sp|O75683|SURF6_HUMAN	NM_006597	0.9	0.954	0.04
sp|O75792|RNH2A_HUMAN	NM_006597	0.7	0.88	-0.23
sp|P51003|PAPOA_HUMAN	NM_006597	0.8	0.923	-0.24
[truncated: 3,001 more rows]
