# Supplementary material for: RNA structure drives interaction with proteins
Source: Nat Commun. 2019 Jul 19;10:3246. doi: 10.1038/s41467-019-10923-5 (PMC6642211; doi:10.1038/s41467-019-10923-5)
Supplement: Supplementary file 6 — Supplementary Data 2 [file 41467_2019_10923_MOESM6_ESM.xlsx]

## Sheet: Sheet1
PDB_ID	RNA chain	Protein chain	Normalised Internal contacts	Normalised external contacts	PDB title
1a34.pdb	C	A	-2.09192	-8.04767	SATELLITE TOBACCO MOSAIC VIRUS/RNA COMPLEX
1a34.pdb	B	A	-2.25239	-9.3696	SATELLITE TOBACCO MOSAIC VIRUS/RNA COMPLEX
1c9s.pdb	W	A	-4.71536	-11.8634	CRYSTAL STRUCTURE OF A COMPLEX OF TRP RNA-BINDING
1c9s.pdb	W	C	-4.71536	-11.8634	CRYSTAL STRUCTURE OF A COMPLEX OF TRP RNA-BINDING
1c9s.pdb	W	B	-4.71536	-11.8424	CRYSTAL STRUCTURE OF A COMPLEX OF TRP RNA-BINDING
1c9s.pdb	W	E	-4.71536	-11.8424	CRYSTAL STRUCTURE OF A COMPLEX OF TRP RNA-BINDING
1c9s.pdb	W	D	-4.71536	-11.8634	CRYSTAL STRUCTURE OF A COMPLEX OF TRP RNA-BINDING
1c9s.pdb	W	G	-4.71536	-11.8842	CRYSTAL STRUCTURE OF A COMPLEX OF TRP RNA-BINDING
1c9s.pdb	W	F	-4.71536	-11.8634	CRYSTAL STRUCTURE OF A COMPLEX OF TRP RNA-BINDING
1c9s.pdb	W	I	-4.71536	-11.8634	CRYSTAL STRUCTURE OF A COMPLEX OF TRP RNA-BINDING
1c9s.pdb	W	H	-4.71536	-11.8634	CRYSTAL STRUCTURE OF A COMPLEX OF TRP RNA-BINDING
1c9s.pdb	W	K	-4.71536	-11.8634	CRYSTAL STRUCTURE OF A COMPLEX OF TRP RNA-BINDING
1c9s.pdb	W	J	-4.71536	-11.821	CRYSTAL STRUCTURE OF A COMPLEX OF TRP RNA-BINDING
1c9s.pdb	W	M	-4.71536	-10.9046	CRYSTAL STRUCTURE OF A COMPLEX OF TRP RNA-BINDING
1c9s.pdb	W	L	-4.71536	-10.8842	CRYSTAL STRUCTURE OF A COMPLEX OF TRP RNA-BINDING
1c9s.pdb	W	O	-4.71536	-10.9046	CRYSTAL STRUCTURE OF A COMPLEX OF TRP RNA-BINDING
1c9s.pdb	W	N	-4.71536	-10.8842	CRYSTAL STRUCTURE OF A COMPLEX OF TRP RNA-BINDING
1c9s.pdb	W	Q	-4.71536	-10.8842	CRYSTAL STRUCTURE OF A COMPLEX OF TRP RNA-BINDING
1c9s.pdb	W	P	-4.71536	-11.8842	CRYSTAL STRUCTURE OF A COMPLEX OF TRP RNA-BINDING
1c9s.pdb	W	S	-4.71536	-10.8842	CRYSTAL STRUCTURE OF A COMPLEX OF TRP RNA-BINDING
1c9s.pdb	W	R	-4.71536	-10.8842	CRYSTAL STRUCTURE OF A COMPLEX OF TRP RNA-BINDING
1c9s.pdb	W	U	-4.71536	-10.8842	CRYSTAL STRUCTURE OF A COMPLEX OF TRP RNA-BINDING
1c9s.pdb	W	T	-4.71536	-11.8842	CRYSTAL STRUCTURE OF A COMPLEX OF TRP RNA-BINDING
1c9s.pdb	W	V	-4.71536	-11.8842	CRYSTAL STRUCTURE OF A COMPLEX OF TRP RNA-BINDING
1dfu.pdb	M	P	-3.13053	-8.05709	CRYSTAL STRUCTURE OF E.COLI RIBOSOMAL PROTEIN L25 COMPLEXED
1dfu.pdb	N	P	-3.04564	-7.47213	CRYSTAL STRUCTURE OF E.COLI RIBOSOMAL PROTEIN L25 COMPLEXED
1di2.pdb	C	A	-1.91254	-9.14975	CRYSTAL STRUCTURE OF A DSRNA-BINDING DOMAIN COMPLEXED WITH
1di2.pdb	C	B	-1.91254	-8.9542	CRYSTAL STRUCTURE OF A DSRNA-BINDING DOMAIN COMPLEXED WITH
1di2.pdb	E	A	-1.91254	-8.14975	CRYSTAL STRUCTURE OF A DSRNA-BINDING DOMAIN COMPLEXED WITH
1di2.pdb	E	B	-1.91254	-6.63227	CRYSTAL STRUCTURE OF A DSRNA-BINDING DOMAIN COMPLEXED WITH
1di2.pdb	D	A	-1.91254	-6.56478	CRYSTAL STRUCTURE OF A DSRNA-BINDING DOMAIN COMPLEXED WITH
1di2.pdb	D	B	-1.91254	-7.9542	CRYSTAL STRUCTURE OF A DSRNA-BINDING DOMAIN COMPLEXED WITH
1di2.pdb	G	A	-1.91254	-9.14975	CRYSTAL STRUCTURE OF A DSRNA-BINDING DOMAIN COMPLEXED WITH
1di2.pdb	G	B	-1.91254	-8.9542	CRYSTAL STRUCTURE OF A DSRNA-BINDING DOMAIN COMPLEXED WITH
1dul.pdb	B	A	-4.41777	-8.86934	STRUCTURE OF THE RIBONUCLEOPROTEIN CORE OF THE E. COLI
1fxl.pdb	B	A	-1.75207	-7.21378	CRYSTAL STRUCTURE OF HUD AND AU-RICH ELEMENT OF THE C-FOS
1g1x.pdb	I	A	-4.38098	-10.9001	STRUCTURE OF RIBOSOMAL PROTEINS S15, S6, S18, AND 16S
1g1x.pdb	I	C	-4.38098	-10.809	STRUCTURE OF RIBOSOMAL PROTEINS S15, S6, S18, AND 16S
1g1x.pdb	I	B	-4.38098	-11.7448	STRUCTURE OF RIBOSOMAL PROTEINS S15, S6, S18, AND 16S
1g1x.pdb	I	G	-4.38098	-9.74483	STRUCTURE OF RIBOSOMAL PROTEINS S15, S6, S18, AND 16S
1g1x.pdb	I	F	-4.38098	-10.9001	STRUCTURE OF RIBOSOMAL PROTEINS S15, S6, S18, AND 16S
1g1x.pdb	I	H	-4.38098	-9.87036	STRUCTURE OF RIBOSOMAL PROTEINS S15, S6, S18, AND 16S
1g1x.pdb	J	A	-4.37524	-10.4221	STRUCTURE OF RIBOSOMAL PROTEINS S15, S6, S18, AND 16S
1g1x.pdb	J	C	-4.37524	-10.9159	STRUCTURE OF RIBOSOMAL PROTEINS S15, S6, S18, AND 16S
1g1x.pdb	J	B	-4.37524	-11.8517	STRUCTURE OF RIBOSOMAL PROTEINS S15, S6, S18, AND 16S
1g1x.pdb	J	G	-4.37524	-7.94486	STRUCTURE OF RIBOSOMAL PROTEINS S15, S6, S18, AND 16S
1g1x.pdb	J	F	-4.37524	-9.00703	STRUCTURE OF RIBOSOMAL PROTEINS S15, S6, S18, AND 16S
1g1x.pdb	J	H	-4.37524	-7.80735	STRUCTURE OF RIBOSOMAL PROTEINS S15, S6, S18, AND 16S
1g1x.pdb	E	A	-4.34169	-9.00703	STRUCTURE OF RIBOSOMAL PROTEINS S15, S6, S18, AND 16S
1g1x.pdb	E	C	-4.34169	-7.91588	STRUCTURE OF RIBOSOMAL PROTEINS S15, S6, S18, AND 16S
1g1x.pdb	E	B	-4.34169	-8.04439	STRUCTURE OF RIBOSOMAL PROTEINS S15, S6, S18, AND 16S
1g1x.pdb	E	G	-4.34169	-11.8517	STRUCTURE OF RIBOSOMAL PROTEINS S15, S6, S18, AND 16S
1g1x.pdb	E	F	-4.34169	-10.4221	STRUCTURE OF RIBOSOMAL PROTEINS S15, S6, S18, AND 16S
1g1x.pdb	E	H	-4.34169	-10.9773	STRUCTURE OF RIBOSOMAL PROTEINS S15, S6, S18, AND 16S
1g1x.pdb	D	A	-4.30603	-10.8626	STRUCTURE OF RIBOSOMAL PROTEINS S15, S6, S18, AND 16S
1g1x.pdb	D	C	-4.30603	-10.7715	STRUCTURE OF RIBOSOMAL PROTEINS S15, S6, S18, AND 16S
1g1x.pdb	D	B	-4.30603	-9.38543	STRUCTURE OF RIBOSOMAL PROTEINS S15, S6, S18, AND 16S
1g1x.pdb	D	G	-4.30603	-11.7074	STRUCTURE OF RIBOSOMAL PROTEINS S15, S6, S18, AND 16S
1g1x.pdb	D	F	-4.30603	-10.8626	STRUCTURE OF RIBOSOMAL PROTEINS S15, S6, S18, AND 16S
1g1x.pdb	D	H	-4.30603	-10.8329	STRUCTURE OF RIBOSOMAL PROTEINS S15, S6, S18, AND 16S
1gtf.pdb	W	A	-4.78644	-11.5348	THE STRUCTURE OF THE TRP RNA-BINDING ATTENUATION PROTEIN
1gtf.pdb	W	C	-4.78644	-11.5555	THE STRUCTURE OF THE TRP RNA-BINDING ATTENUATION PROTEIN
1gtf.pdb	W	B	-4.78644	-11.5137	THE STRUCTURE OF THE TRP RNA-BINDING ATTENUATION PROTEIN
1gtf.pdb	W	E	-4.78644	-11.5137	THE STRUCTURE OF THE TRP RNA-BINDING ATTENUATION PROTEIN
1gtf.pdb	W	D	-4.78644	-11.5348	THE STRUCTURE OF THE TRP RNA-BINDING ATTENUATION PROTEIN
1gtf.pdb	W	G	-4.78644	-11.5555	THE STRUCTURE OF THE TRP RNA-BINDING ATTENUATION PROTEIN
1gtf.pdb	W	F	-4.78644	-11.5348	THE STRUCTURE OF THE TRP RNA-BINDING ATTENUATION PROTEIN
1gtf.pdb	W	I	-4.78644	-11.5348	THE STRUCTURE OF THE TRP RNA-BINDING ATTENUATION PROTEIN
1gtf.pdb	W	H	-4.78644	-11.5137	THE STRUCTURE OF THE TRP RNA-BINDING ATTENUATION PROTEIN
1gtf.pdb	W	K	-4.78644	-11.5348	THE STRUCTURE OF THE TRP RNA-BINDING ATTENUATION PROTEIN
1gtf.pdb	W	J	-4.78644	-11.4924	THE STRUCTURE OF THE TRP RNA-BINDING ATTENUATION PROTEIN
1gtf.pdb	W	M	-4.78644	-11.576	THE STRUCTURE OF THE TRP RNA-BINDING ATTENUATION PROTEIN
1gtf.pdb	W	L	-4.78644	-11.5555	THE STRUCTURE OF THE TRP RNA-BINDING ATTENUATION PROTEIN
1gtf.pdb	W	O	-4.78644	-11.5555	THE STRUCTURE OF THE TRP RNA-BINDING ATTENUATION PROTEIN
1gtf.pdb	W	N	-4.78644	-11.5555	THE STRUCTURE OF THE TRP RNA-BINDING ATTENUATION PROTEIN
1gtf.pdb	W	Q	-4.78644	-11.5555	THE STRUCTURE OF THE TRP RNA-BINDING ATTENUATION PROTEIN
1gtf.pdb	W	P	-4.78644	-11.5555	THE STRUCTURE OF THE TRP RNA-BINDING ATTENUATION PROTEIN
1gtf.pdb	W	S	-4.78644	-11.5555	THE STRUCTURE OF THE TRP RNA-BINDING ATTENUATION PROTEIN
1gtf.pdb	W	R	-4.78644	-11.5555	THE STRUCTURE OF THE TRP RNA-BINDING ATTENUATION PROTEIN
1gtf.pdb	W	U	-4.78644	-11.5555	THE STRUCTURE OF THE TRP RNA-BINDING ATTENUATION PROTEIN
1gtf.pdb	W	T	-4.78644	-11.5555	THE STRUCTURE OF THE TRP RNA-BINDING ATTENUATION PROTEIN
1gtf.pdb	W	V	-4.78644	-11.5555	THE STRUCTURE OF THE TRP RNA-BINDING ATTENUATION PROTEIN
1h2c.pdb	R	A	1.58496	-5.9542	EBOLA VIRUS MATRIX PROTEIN VP40 N-TERMINAL DOMAIN IN
1hq1.pdb	B	A	-4.41777	-8.96413	STRUCTURAL AND ENERGETIC ANALYSIS OF RNA RECOGNITION BY A
1j1u.pdb	B	A	-5.04523	-12.072	CRYSTAL STRUCTURE OF ARCHAEAL TYROSYL-TRNA SYNTHETASE
1jbs.pdb	C	A	-2.87072	-8.04924	CRYSTAL STRUCTURE OF RIBOTOXIN RESTRICTOCIN AND A 29-MER SRD RNA
1jbs.pdb	C	B	-2.87072	-11.2192	CRYSTAL STRUCTURE OF RIBOTOXIN RESTRICTOCIN AND A 29-MER SRD RNA
1jbs.pdb	D	A	-2.87072	-11.2192	CRYSTAL STRUCTURE OF RIBOTOXIN RESTRICTOCIN AND A 29-MER SRD RNA
1jbs.pdb	D	B	-2.87072	-8.21917	CRYSTAL STRUCTURE OF RIBOTOXIN RESTRICTOCIN AND A 29-MER SRD RNA
1jid.pdb	B	A	-3.73312	-7.89178	HUMAN SRP19 IN COMPLEX WITH HELIX 6 OF HUMAN SRP RNA
1k8w.pdb	B	A	-3.21045	-7.61716	CRYSTAL STRUCTURE OF THE E. COLI PSEUDOURIDINE SYNTHASE
1r9f.pdb	C	A	-3.1304	-7.87036	CRYSTAL STRUCTURE OF P19 COMPLEXED WITH 19-BP SMALL
1r9f.pdb	B	A	-3.1304	-7.71836	CRYSTAL STRUCTURE OF P19 COMPLEXED WITH 19-BP SMALL
1sds.pdb	E	A	-2.5429	-10.5831	STRUCTURE OF PROTEIN L7AE BOUND TO A K-TURN DERIVED FROM AN ARCHAEAL
1sds.pdb	E	C	-2.5429	-10.5459	STRUCTURE OF PROTEIN L7AE BOUND TO A K-TURN DERIVED FROM AN ARCHAEAL
1sds.pdb	E	B	-2.5429	-7.6875	STRUCTURE OF PROTEIN L7AE BOUND TO A K-TURN DERIVED FROM AN ARCHAEAL
1sds.pdb	D	A	-2.5429	-7.77573	STRUCTURE OF PROTEIN L7AE BOUND TO A K-TURN DERIVED FROM AN ARCHAEAL
1sds.pdb	D	C	-2.5429	-8.54593	STRUCTURE OF PROTEIN L7AE BOUND TO A K-TURN DERIVED FROM AN ARCHAEAL
1sds.pdb	D	B	-2.5429	-10.4949	STRUCTURE OF PROTEIN L7AE BOUND TO A K-TURN DERIVED FROM AN ARCHAEAL
1sds.pdb	F	A	-2.5429	-8.58308	STRUCTURE OF PROTEIN L7AE BOUND TO A K-TURN DERIVED FROM AN ARCHAEAL
1sds.pdb	F	C	-2.5429	-7.73857	STRUCTURE OF PROTEIN L7AE BOUND TO A K-TURN DERIVED FROM AN ARCHAEAL
1sds.pdb	F	B	-2.5429	-10.4949	STRUCTURE OF PROTEIN L7AE BOUND TO A K-TURN DERIVED FROM AN ARCHAEAL
1urn.pdb	Q	A	-3.1383	-10.8329	U1A MUTANT/RNA COMPLEX + GLYCEROL
1urn.pdb	Q	C	-3.1383	-10.8329	U1A MUTANT/RNA COMPLEX + GLYCEROL
1urn.pdb	Q	B	-3.1383	-8.24793	U1A MUTANT/RNA COMPLEX + GLYCEROL
1urn.pdb	P	A	-3.13053	-9.08746	U1A MUTANT/RNA COMPLEX + GLYCEROL
1urn.pdb	P	C	-3.13053	-10.6724	U1A MUTANT/RNA COMPLEX + GLYCEROL
1urn.pdb	P	B	-3.13053	-10.6724	U1A MUTANT/RNA COMPLEX + GLYCEROL
1urn.pdb	R	A	-3.21057	-10.7549	U1A MUTANT/RNA COMPLEX + GLYCEROL
1urn.pdb	R	C	-3.21057	-8.43296	U1A MUTANT/RNA COMPLEX + GLYCEROL
1urn.pdb	R	B	-3.21057	-10.7549	U1A MUTANT/RNA COMPLEX + GLYCEROL
1uvj.pdb	E	A	0.321928	-10.375	THE STRUCTURAL BASIS FOR RNA SPECIFICITY AND CA2 INHIBITION OF AN RNA-
1uvj.pdb	E	C	0.321928	-10.375	THE STRUCTURAL BASIS FOR RNA SPECIFICITY AND CA2 INHIBITION OF AN RNA-
1uvj.pdb	E	B	0.321928	-7.20511	THE STRUCTURAL BASIS FOR RNA SPECIFICITY AND CA2 INHIBITION OF AN RNA-
1uvj.pdb	D	A	0.321928	-6.91561	THE STRUCTURAL BASIS FOR RNA SPECIFICITY AND CA2 INHIBITION OF AN RNA-
1uvj.pdb	D	C	0.321928	-10.375	THE STRUCTURAL BASIS FOR RNA SPECIFICITY AND CA2 INHIBITION OF AN RNA-
1uvj.pdb	D	B	0.321928	-10.375	THE STRUCTURAL BASIS FOR RNA SPECIFICITY AND CA2 INHIBITION OF AN RNA-
1uvj.pdb	F	A	0.321928	-10.375	THE STRUCTURAL BASIS FOR RNA SPECIFICITY AND CA2 INHIBITION OF AN RNA-
1uvj.pdb	F	C	0.321928	-7.05311	THE STRUCTURAL BASIS FOR RNA SPECIFICITY AND CA2 INHIBITION OF AN RNA-
1uvj.pdb	F	B	0.321928	-10.375	THE STRUCTURAL BASIS FOR RNA SPECIFICITY AND CA2 INHIBITION OF AN RNA-
1uvl.pdb	B	A	-0.36257	-7.37504	THE STRUCTURAL BASIS FOR RNA SPECIFICITY AND CA2 INHIBITION OF AN RNA-
1uvl.pdb	B	C	-0.36257	-10.96	THE STRUCTURAL BASIS FOR RNA SPECIFICITY AND CA2 INHIBITION OF AN RNA-
1uvl.pdb	B	E	-0.36257	-10.96	THE STRUCTURAL BASIS FOR RNA SPECIFICITY AND CA2 INHIBITION OF AN RNA-
1uvl.pdb	D	A	-0.36257	-10.96	THE STRUCTURAL BASIS FOR RNA SPECIFICITY AND CA2 INHIBITION OF AN RNA-
1uvl.pdb	D	C	-0.36257	-7.37504	THE STRUCTURAL BASIS FOR RNA SPECIFICITY AND CA2 INHIBITION OF AN RNA-
1uvl.pdb	D	E	-0.36257	-10.96	THE STRUCTURAL BASIS FOR RNA SPECIFICITY AND CA2 INHIBITION OF AN RNA-
1uvl.pdb	F	A	-0.36257	-10.96	THE STRUCTURAL BASIS FOR RNA SPECIFICITY AND CA2 INHIBITION OF AN RNA-
1uvl.pdb	F	C	-0.36257	-10.96	THE STRUCTURAL BASIS FOR RNA SPECIFICITY AND CA2 INHIBITION OF AN RNA-
1uvl.pdb	F	E	-0.36257	-7.37504	THE STRUCTURAL BASIS FOR RNA SPECIFICITY AND CA2 INHIBITION OF AN RNA-
1uvm.pdb	E	A	-0.36257	-10.96	THE STRUCTURAL BASIS FOR RNA SPECIFICITY AND CA2 INHIBITION OF AN RNA-
1uvm.pdb	E	C	-0.36257	-10.96	THE STRUCTURAL BASIS FOR RNA SPECIFICITY AND CA2 INHIBITION OF AN RNA-
1uvm.pdb	E	B	-0.36257	-7.96	THE STRUCTURAL BASIS FOR RNA SPECIFICITY AND CA2 INHIBITION OF AN RNA-
1uvm.pdb	D	A	-0.36257	-7.96	THE STRUCTURAL BASIS FOR RNA SPECIFICITY AND CA2 INHIBITION OF AN RNA-
1uvm.pdb	D	C	-0.36257	-10.96	THE STRUCTURAL BASIS FOR RNA SPECIFICITY AND CA2 INHIBITION OF AN RNA-
1uvm.pdb	D	B	-0.36257	-10.96	THE STRUCTURAL BASIS FOR RNA SPECIFICITY AND CA2 INHIBITION OF AN RNA-
1uvm.pdb	F	A	-0.36257	-10.96	THE STRUCTURAL BASIS FOR RNA SPECIFICITY AND CA2 INHIBITION OF AN RNA-
1uvm.pdb	F	C	-0.36257	-7.96	THE STRUCTURAL BASIS FOR RNA SPECIFICITY AND CA2 INHIBITION OF AN RNA-
1uvm.pdb	F	B	-0.36257	-10.96	THE STRUCTURAL BASIS FOR RNA SPECIFICITY AND CA2 INHIBITION OF AN RNA-
1wmq.pdb	C	A	-1.46949	-6.42291	STRUCTURE OF THE HUTP ANTITERMINATION COMPLEX BOUND TO A SINGLE
1wmq.pdb	C	B	-1.46949	-9.74483	STRUCTURE OF THE HUTP ANTITERMINATION COMPLEX BOUND TO A SINGLE
1wmq.pdb	D	A	-1.46949	-9.74483	STRUCTURE OF THE HUTP ANTITERMINATION COMPLEX BOUND TO A SINGLE
1wmq.pdb	D	B	-1.46949	-6.42291	STRUCTURE OF THE HUTP ANTITERMINATION COMPLEX BOUND TO A SINGLE
1wpu.pdb	C	A	-1.18442	-6.19967	CRYSTAL STRUCTURE OF THE HUTP ANTITERMINATION COMPLEX BOUND TO A
1wpu.pdb	C	B	-1.18442	-9.5216	CRYSTAL STRUCTURE OF THE HUTP ANTITERMINATION COMPLEX BOUND TO A
1wpu.pdb	D	A	-1.18442	-9.5216	CRYSTAL STRUCTURE OF THE HUTP ANTITERMINATION COMPLEX BOUND TO A
1wpu.pdb	D	B	-1.18442	-6.06217	CRYSTAL STRUCTURE OF THE HUTP ANTITERMINATION COMPLEX BOUND TO A
1zh5.pdb	C	A	-1.70782	-9.3072	STRUCTURAL BASIS FOR RECOGNITION OF UUUOH 3'-TERMINII OF NASCENT RNA
1zh5.pdb	C	B	-1.70782	-7.97728	STRUCTURAL BASIS FOR RECOGNITION OF UUUOH 3'-TERMINII OF NASCENT RNA
1zh5.pdb	D	A	-1.70782	-8.3072	STRUCTURAL BASIS FOR RECOGNITION OF UUUOH 3'-TERMINII OF NASCENT RNA
1zh5.pdb	D	B	-1.70782	-9.29921	STRUCTURAL BASIS FOR RECOGNITION OF UUUOH 3'-TERMINII OF NASCENT RNA
2anr.pdb	B	A	-3.4926	-8.71682	CRYSTAL STRUCTURE (II) OF NOVA-1 KH1/KH2 DOMAIN TANDEM WITH 25NT RNA
2asb.pdb	B	A	-2.09192	-7.18275	STRUCTURE OF A MYCOBACTERIUM TUBERCULOSIS NUSA-RNA COMPLEX
2b3j.pdb	H	A	-2.64599	-10.9388	CRYSTAL STRUCTURE OF STAPHYLOCOCCUS AUREUS TRNA ADENOSINE DEAMINASE,
2b3j.pdb	H	C	-2.64599	-8.94837	CRYSTAL STRUCTURE OF STAPHYLOCOCCUS AUREUS TRNA ADENOSINE DEAMINASE,
2b3j.pdb	H	B	-2.64599	-10.9388	CRYSTAL STRUCTURE OF STAPHYLOCOCCUS AUREUS TRNA ADENOSINE DEAMINASE,
2b3j.pdb	H	D	-2.64599	-9.92926	CRYSTAL STRUCTURE OF STAPHYLOCOCCUS AUREUS TRNA ADENOSINE DEAMINASE,
2b3j.pdb	E	A	-2.64636	-9.82337	CRYSTAL STRUCTURE OF STAPHYLOCOCCUS AUREUS TRNA ADENOSINE DEAMINASE,
2b3j.pdb	E	C	-2.64636	-10.8329	CRYSTAL STRUCTURE OF STAPHYLOCOCCUS AUREUS TRNA ADENOSINE DEAMINASE,
2b3j.pdb	E	B	-2.64636	-8.82337	CRYSTAL STRUCTURE OF STAPHYLOCOCCUS AUREUS TRNA ADENOSINE DEAMINASE,
2b3j.pdb	E	D	-2.64636	-10.8138	CRYSTAL STRUCTURE OF STAPHYLOCOCCUS AUREUS TRNA ADENOSINE DEAMINASE,
2b3j.pdb	G	A	-1.47393	-9.56033	CRYSTAL STRUCTURE OF STAPHYLOCOCCUS AUREUS TRNA ADENOSINE DEAMINASE,
2b3j.pdb	G	C	-1.47393	-8.56986	CRYSTAL STRUCTURE OF STAPHYLOCOCCUS AUREUS TRNA ADENOSINE DEAMINASE,
2b3j.pdb	G	B	-1.47393	-9.56033	CRYSTAL STRUCTURE OF STAPHYLOCOCCUS AUREUS TRNA ADENOSINE DEAMINASE,
2b3j.pdb	G	D	-1.47393	-9.55075	CRYSTAL STRUCTURE OF STAPHYLOCOCCUS AUREUS TRNA ADENOSINE DEAMINASE,
2b3j.pdb	F	A	-2.52607	-8.82337	CRYSTAL STRUCTURE OF STAPHYLOCOCCUS AUREUS TRNA ADENOSINE DEAMINASE,
2b3j.pdb	F	C	-2.52607	-10.8329	CRYSTAL STRUCTURE OF STAPHYLOCOCCUS AUREUS TRNA ADENOSINE DEAMINASE,
2b3j.pdb	F	B	-2.52607	-9.82337	CRYSTAL STRUCTURE OF STAPHYLOCOCCUS AUREUS TRNA ADENOSINE DEAMINASE,
2b3j.pdb	F	D	-2.52607	-10.8138	CRYSTAL STRUCTURE OF STAPHYLOCOCCUS AUREUS TRNA ADENOSINE DEAMINASE,
2f8k.pdb	B	A	-2.85982	-7.42626	SEQUENCE SPECIFIC RECOGNITION OF RNA HAIRPINS BY THE SAM DOMAIN OF
2jlv.pdb	C	A	-1.18442	-6.75298	DENGUE VIRUS 4 NS3 HELICASE IN COMPLEX WITH SSRNA AND
2jlv.pdb	C	B	-1.18442	-11.1453	DENGUE VIRUS 4 NS3 HELICASE IN COMPLEX WITH SSRNA AND
2jlv.pdb	D	A	-1.18442	-11.1453	DENGUE VIRUS 4 NS3 HELICASE IN COMPLEX WITH SSRNA AND
2jlv.pdb	D	B	-1.18442	-6.62173	DENGUE VIRUS 4 NS3 HELICASE IN COMPLEX WITH SSRNA AND
2nug.pdb	C	A	-2.25154	-8.26946	CRYSTAL STRUCTURE OF RNASE III FROM AQUIFEX AEOLICUS COMPLEXED WITH
2nug.pdb	C	B	-2.25154	-8.50515	CRYSTAL STRUCTURE OF RNASE III FROM AQUIFEX AEOLICUS COMPLEXED WITH
2nug.pdb	E	A	-2.12553	-9.33985	CRYSTAL STRUCTURE OF RNASE III FROM AQUIFEX AEOLICUS COMPLEXED WITH
2nug.pdb	E	B	-2.12553	-8.54579	CRYSTAL STRUCTURE OF RNASE III FROM AQUIFEX AEOLICUS COMPLEXED WITH
2nug.pdb	D	A	-2.25154	-8.26946	CRYSTAL STRUCTURE OF RNASE III FROM AQUIFEX AEOLICUS COMPLEXED WITH
2nug.pdb	D	B	-2.25154	-8.28276	CRYSTAL STRUCTURE OF RNASE III FROM AQUIFEX AEOLICUS COMPLEXED WITH
2nug.pdb	F	A	-2.12553	-8.5325	CRYSTAL STRUCTURE OF RNASE III FROM AQUIFEX AEOLICUS COMPLEXED WITH
2nug.pdb	F	B	-2.12553	-9.35315	CRYSTAL STRUCTURE OF RNASE III FROM AQUIFEX AEOLICUS COMPLEXED WITH
2po1.pdb	C	A	-2	-7.67847	CRYSTAL STRUCTURE OF THE P. ABYSSI EXOSOME RNASE PH RING
2po1.pdb	C	B	-2	-10.6511	CRYSTAL STRUCTURE OF THE P. ABYSSI EXOSOME RNASE PH RING
2pxd.pdb	B	A	-4.45097	-8.67797	VARIANT 1 OF RIBONUCLEOPROTEIN CORE OF THE E. COLI SIGNAL RECOGNITION
2pxe.pdb	B	A	-4.45097	-9.48533	VARIANT 4 OF RIBONUCLEOPROTEIN CORE OF THE E. COLI SIGNAL
2pxf.pdb	B	A	-4.45097	-8.67797	VARIANT 5 OF RIBONUCLEOPROTEIN CORE OF THE E. COLI SIGNAL
2pxv.pdb	B	A	-4.45097	-8.90036	VARIANT 6 OF RIBONUCLEOPROTEIN CORE OF THE E. COLI SIGNAL RECOGNITION
2q66.pdb	X	A	-0.830075	-8.52095	STRUCTURE OF YEAST POLY(A) POLYMERASE WITH ATP AND OLIGO(A)
2r8s.pdb	R	H	-6.16718	-11.2555	HIGH RESOLUTION STRUCTURE OF A SPECIFIC SYNTHETIC FAB BOUND TO P4-P6
2r8s.pdb	R	L	-6.16718	-12.0361	HIGH RESOLUTION STRUCTURE OF A SPECIFIC SYNTHETIC FAB BOUND TO P4-P6
2voo.pdb	C	A	1.58496	-5.48382	CRYSTAL STRUCTURE OF N-TERMINAL DOMAINS OF HUMAN LA PROTEIN
2voo.pdb	C	B	1.58496	-7.46761	CRYSTAL STRUCTURE OF N-TERMINAL DOMAINS OF HUMAN LA PROTEIN
2voo.pdb	D	A	1.58496	-7.48382	CRYSTAL STRUCTURE OF N-TERMINAL DOMAINS OF HUMAN LA PROTEIN
2voo.pdb	D	B	1.58496	-4.88264	CRYSTAL STRUCTURE OF N-TERMINAL DOMAINS OF HUMAN LA PROTEIN
2xlk.pdb	C	A	-2.75673	-7.56986	CRYSTAL STRUCTURE OF THE CSY4-CRRNA COMPLEX, ORTHORHOMBIC FORM
2xlk.pdb	C	B	-2.75673	-11.3231	CRYSTAL STRUCTURE OF THE CSY4-CRRNA COMPLEX, ORTHORHOMBIC FORM
2xlk.pdb	D	A	-2.75673	-11.3772	CRYSTAL STRUCTURE OF THE CSY4-CRRNA COMPLEX, ORTHORHOMBIC FORM
2xlk.pdb	D	B	-2.75673	-7.41616	CRYSTAL STRUCTURE OF THE CSY4-CRRNA COMPLEX, ORTHORHOMBIC FORM
2xnr.pdb	C	A	-0.847997	-5.22882	STRUCTURAL INSIGHTS INTO CIS ELEMENT RECOGNITION OF NON-
2xs2.pdb	B	A	-1.18442	-6.05373	CRYSTAL STRUCTURE OF THE RRM DOMAIN OF MOUSE DELETED IN AZOOSPERMIA-
2xs5.pdb	C	A	-0.36257	-6.07682	CRYSTAL STRUCTURE OF THE RRM DOMAIN OF MOUSE DELETED IN
2xs5.pdb	C	B	-0.36257	-8.02791	CRYSTAL STRUCTURE OF THE RRM DOMAIN OF MOUSE DELETED IN
2xs5.pdb	D	A	-0.36257	-8.07682	CRYSTAL STRUCTURE OF THE RRM DOMAIN OF MOUSE DELETED IN
2xs5.pdb	D	B	-0.36257	-6.02791	CRYSTAL STRUCTURE OF THE RRM DOMAIN OF MOUSE DELETED IN
2xs7.pdb	B	A	-0.36257	-5.72247	CRYSTAL STRUCTURE OF THE RRM DOMAIN OF MOUSE DELETED IN
2y8w.pdb	B	A	-3.13053	-8.13522	STRUCTURE OF CRISPR ENDORIBONUCLEASE CSE3 BOUND TO 20 NT RNA
2y8y.pdb	B	A	-3.0458	-7.74416	STRUCTURE B OF CRISPR ENDORIBONUCLEASE CSE3 BOUND TO 19 NT RNA
2zko.pdb	C	A	-3.2863	-8.12928	STRUCTURAL BASIS FOR DSRNA RECOGNITION BY NS1 PROTEIN OF HUMAN
2zko.pdb	C	B	-3.2863	-8.12928	STRUCTURAL BASIS FOR DSRNA RECOGNITION BY NS1 PROTEIN OF HUMAN
2zko.pdb	D	A	-3.2863	-8.12928	STRUCTURAL BASIS FOR DSRNA RECOGNITION BY NS1 PROTEIN OF HUMAN
2zko.pdb	D	B	-3.2863	-8.12928	STRUCTURAL BASIS FOR DSRNA RECOGNITION BY NS1 PROTEIN OF HUMAN
2zue.pdb	B	A	-5.16494	-11.2206	CRYSTAL STRUCTURE OF PYROCOCCUS HORIKOSHII ARGINYL-TRNA
3b0u.pdb	A	Y	0	-8.29462	TRNA-DIHYDROURIDINE SYNTHASE FROM THERMUS THERMOPHILUS IN COMPLEX WITH
3b0u.pdb	A	X	0	-6.70966	TRNA-DIHYDROURIDINE SYNTHASE FROM THERMUS THERMOPHILUS IN COMPLEX WITH
3b0u.pdb	B	Y	0	-6.70966	TRNA-DIHYDROURIDINE SYNTHASE FROM THERMUS THERMOPHILUS IN COMPLEX WITH
3b0u.pdb	B	X	0	-8.29462	TRNA-DIHYDROURIDINE SYNTHASE FROM THERMUS THERMOPHILUS IN COMPLEX WITH
3boy.pdb	D	A	-3.21759	-8.5216	CRYSTAL STRUCTURE OF THE HUTP ANTITERMINATION COMPLEX BOUND TO THE HUT
3boy.pdb	D	C	-3.21759	-8.19967	CRYSTAL STRUCTURE OF THE HUTP ANTITERMINATION COMPLEX BOUND TO THE HUT
3boy.pdb	D	B	-3.21759	-8.5216	CRYSTAL STRUCTURE OF THE HUTP ANTITERMINATION COMPLEX BOUND TO THE HUT
3bsn.pdb	P	A	-1.46949	-7.68149	NORWALK VIRUS POLYMERASE BOUND TO 5-NITROCYTIDINE TRIPHOSPHATE AND
3bsn.pdb	T	A	-1.46949	-7.31892	NORWALK VIRUS POLYMERASE BOUND TO 5-NITROCYTIDINE TRIPHOSPHATE AND
3bso.pdb	P	A	-1.46949	-7.7884	NORWALK VIRUS POLYMERASE BOUND TO CYTIDINE 5'-TRIPHOSPHATE AND PRIMER-
3bso.pdb	T	A	-1.91254	-7.38032	NORWALK VIRUS POLYMERASE BOUND TO CYTIDINE 5'-TRIPHOSPHATE AND PRIMER-
3d2s.pdb	H	A	0.321928	-7.06609	CRYSTAL STRUCTURE OF MBNL1 TANDEM ZINC FINGER 3 AND 4 DOMAIN IN
3d2s.pdb	H	C	0.321928	-7.06609	CRYSTAL STRUCTURE OF MBNL1 TANDEM ZINC FINGER 3 AND 4 DOMAIN IN
3d2s.pdb	H	B	0.321928	-7.08746	CRYSTAL STRUCTURE OF MBNL1 TANDEM ZINC FINGER 3 AND 4 DOMAIN IN
3d2s.pdb	H	D	0.321928	-6.08746	CRYSTAL STRUCTURE OF MBNL1 TANDEM ZINC FINGER 3 AND 4 DOMAIN IN
3d2s.pdb	E	A	-0.830075	-8.06609	CRYSTAL STRUCTURE OF MBNL1 TANDEM ZINC FINGER 3 AND 4 DOMAIN IN
3d2s.pdb	E	C	-0.830075	-8.06609	CRYSTAL STRUCTURE OF MBNL1 TANDEM ZINC FINGER 3 AND 4 DOMAIN IN
3d2s.pdb	E	B	-0.830075	-8.08746	CRYSTAL STRUCTURE OF MBNL1 TANDEM ZINC FINGER 3 AND 4 DOMAIN IN
3d2s.pdb	E	D	-0.830075	-8.08746	CRYSTAL STRUCTURE OF MBNL1 TANDEM ZINC FINGER 3 AND 4 DOMAIN IN
3d2s.pdb	G	A	-0.830075	-8.06609	CRYSTAL STRUCTURE OF MBNL1 TANDEM ZINC FINGER 3 AND 4 DOMAIN IN
3d2s.pdb	G	C	-0.830075	-8.06609	CRYSTAL STRUCTURE OF MBNL1 TANDEM ZINC FINGER 3 AND 4 DOMAIN IN
3d2s.pdb	G	B	-0.830075	-8.08746	CRYSTAL STRUCTURE OF MBNL1 TANDEM ZINC FINGER 3 AND 4 DOMAIN IN
3d2s.pdb	G	D	-0.830075	-8.08746	CRYSTAL STRUCTURE OF MBNL1 TANDEM ZINC FINGER 3 AND 4 DOMAIN IN
3d2s.pdb	F	A	0.321928	-7.06609	CRYSTAL STRUCTURE OF MBNL1 TANDEM ZINC FINGER 3 AND 4 DOMAIN IN
3d2s.pdb	F	C	0.321928	-7.06609	CRYSTAL STRUCTURE OF MBNL1 TANDEM ZINC FINGER 3 AND 4 DOMAIN IN
3d2s.pdb	F	B	0.321928	-6.08746	CRYSTAL STRUCTURE OF MBNL1 TANDEM ZINC FINGER 3 AND 4 DOMAIN IN
3d2s.pdb	F	D	0.321928	-7.08746	CRYSTAL STRUCTURE OF MBNL1 TANDEM ZINC FINGER 3 AND 4 DOMAIN IN
3dd2.pdb	B	H	-3.36678	-8.35915	CRYSTAL STRUCTURE OF AN RNA APTAMER BOUND TO HUMAN THROMBIN
3dd2.pdb	B	L	-3.36678	-8.71425	CRYSTAL STRUCTURE OF AN RNA APTAMER BOUND TO HUMAN THROMBIN
3eqt.pdb	C	A	-1.46949	-5.66676	CRYSTAL STRUCTURE OF HUMAN LGP2 C-TERMINAL DOMAIN IN COMPLEX
3eqt.pdb	C	B	-1.46949	-9.73471	CRYSTAL STRUCTURE OF HUMAN LGP2 C-TERMINAL DOMAIN IN COMPLEX
3eqt.pdb	D	A	-1.46949	-9.57365	CRYSTAL STRUCTURE OF HUMAN LGP2 C-TERMINAL DOMAIN IN COMPLEX
3eqt.pdb	D	B	-1.46949	-5.92735	CRYSTAL STRUCTURE OF HUMAN LGP2 C-TERMINAL DOMAIN IN COMPLEX
3g9y.pdb	C	A	-1.26303	-7.49185	CRYSTAL STRUCTURE OF THE SECOND ZINC FINGER FROM ZRANB2/ZNF265 BOUND
3gpq.pdb	E	A	1.58496	-3.87149	CRYSTAL STRUCTURE OF MACRO DOMAIN OF CHIKUNGUNYA VIRUS IN COMPLEX WITH
3gpq.pdb	E	C	1.58496	-7.22882	CRYSTAL STRUCTURE OF MACRO DOMAIN OF CHIKUNGUNYA VIRUS IN COMPLEX WITH
3gpq.pdb	E	B	1.58496	-7.33092	CRYSTAL STRUCTURE OF MACRO DOMAIN OF CHIKUNGUNYA VIRUS IN COMPLEX WITH
3gpq.pdb	E	D	1.58496	-7.20945	CRYSTAL STRUCTURE OF MACRO DOMAIN OF CHIKUNGUNYA VIRUS IN COMPLEX WITH
3gpq.pdb	F	A	1.58496	-7.33092	CRYSTAL STRUCTURE OF MACRO DOMAIN OF CHIKUNGUNYA VIRUS IN COMPLEX WITH
3gpq.pdb	F	C	1.58496	-7.22882	CRYSTAL STRUCTURE OF MACRO DOMAIN OF CHIKUNGUNYA VIRUS IN COMPLEX WITH
3gpq.pdb	F	B	1.58496	-3.87149	CRYSTAL STRUCTURE OF MACRO DOMAIN OF CHIKUNGUNYA VIRUS IN COMPLEX WITH
3gpq.pdb	F	D	1.58496	-7.20945	CRYSTAL STRUCTURE OF MACRO DOMAIN OF CHIKUNGUNYA VIRUS IN COMPLEX WITH
3h5x.pdb	P	A	-1.46949	-8.00205	CRYSTAL STRUCTURE OF 2'-AMINO-2'-DEOXY-CYTIDINE-5'-TRIPHOSPHATE BOUND
3h5x.pdb	T	A	-1.91254	-7.35295	CRYSTAL STRUCTURE OF 2'-AMINO-2'-DEOXY-CYTIDINE-5'-TRIPHOSPHATE BOUND
3h5y.pdb	P	A	-1.46949	-7.77327	NOROVIRUS POLYMERASE+PRIMER/TEMPLATE+CTP COMPLEX AT 6 MM MNCL2
3h5y.pdb	T	A	-1.91254	-7.36518	NOROVIRUS POLYMERASE+PRIMER/TEMPLATE+CTP COMPLEX AT 6 MM MNCL2
3i5x.pdb	B	A	-1.91254	-7.14764	STRUCTURE OF MSS116P BOUND TO SSRNA AND AMP-PNP
3i62.pdb	B	A	-1.91254	-7.14202	STRUCTURE OF MSS116P BOUND TO SSRNA AND ADP-ALUMINUM FLUORIDE
3iev.pdb	D	A	-2.16398	-7.6939	CRYSTAL STRUCTURE OF ERA IN COMPLEX WITH MGGNP AND THE 3' END OF 16S
3k62.pdb	B	A	-1.70782	-11.4512	CRYSTAL STRUCTURE OF FBF-2/GLD-1 FBEB COMPLEX
3k64.pdb	B	A	-1.70782	-11.4512	CRYSTAL STRUCTURE OF FBF-2/FEM-3 PME COMPLEX
3l25.pdb	C	A	-1.46949	-6.9542	CRYSTAL STRUCTURE OF ZAIRE EBOLA VP35 INTERFERON INHIBITORY
3l25.pdb	C	B	-1.46949	-9.55075	CRYSTAL STRUCTURE OF ZAIRE EBOLA VP35 INTERFERON INHIBITORY
3l25.pdb	C	E	-1.46949	-9.53916	CRYSTAL STRUCTURE OF ZAIRE EBOLA VP35 INTERFERON INHIBITORY
3l25.pdb	C	D	-1.46949	-6.7318	CRYSTAL STRUCTURE OF ZAIRE EBOLA VP35 INTERFERON INHIBITORY
3l25.pdb	F	A	-1.46949	-6.7318	CRYSTAL STRUCTURE OF ZAIRE EBOLA VP35 INTERFERON INHIBITORY
3l25.pdb	F	B	-1.46949	-9.55075	CRYSTAL STRUCTURE OF ZAIRE EBOLA VP35 INTERFERON INHIBITORY
3l25.pdb	F	E	-1.46949	-8.53916	CRYSTAL STRUCTURE OF ZAIRE EBOLA VP35 INTERFERON INHIBITORY
3l25.pdb	F	D	-1.46949	-6.9542	CRYSTAL STRUCTURE OF ZAIRE EBOLA VP35 INTERFERON INHIBITORY
3lqx.pdb	B	A	-4.41777	-9.13237	SRP RIBONUCLEOPROTEIN CORE COMPLEXED WITH COBALT HEXAMMINE
3nmr.pdb	B	A	-1.18442	-8.10329	CRYSTAL STRUCTURE OF CUGBP1 RRM1/2-RNA COMPLEX
3nna.pdb	B	A	-0.830075	-7.78136	CRYSTAL STRUCTURE OF CUGBP1 RRM1/2-RNA COMPLEX
3o8c.pdb	C	A	-1.19265	-6.94084	VISUALIZING ATP-DEPENDENT RNA TRANSLOCATION BY THE NS3 HELICASE FROM
3o8c.pdb	C	B	-1.19265	-11.3332	VISUALIZING ATP-DEPENDENT RNA TRANSLOCATION BY THE NS3 HELICASE FROM
3oin.pdb	C	A	-2.77761	-8.55897	CRYSTAL STRUCTURE OF SACCHAROMYCES CEREVISIAE NEP1/EMG1 BOUND TO S-
3oin.pdb	C	B	-2.77761	-9.35315	CRYSTAL STRUCTURE OF SACCHAROMYCES CEREVISIAE NEP1/EMG1 BOUND TO S-
3ova.pdb	C	A	-4.0227	-9.62266	HOW THE CCA-ADDING ENZYME SELECTS ADENINE OVER CYTOSINE IN POSITION 76
3ovb.pdb	C	A	-3.9851	-9.70544	HOW THE CCA-ADDING ENZYME SELECTS ADENINE OVER CYTOSINE IN POSITION 76
3ovb.pdb	C	B	-3.9851	-13.8622	HOW THE CCA-ADDING ENZYME SELECTS ADENINE OVER CYTOSINE IN POSITION 76
3ovb.pdb	D	A	-3.9851	-13.8754	HOW THE CCA-ADDING ENZYME SELECTS ADENINE OVER CYTOSINE IN POSITION 76
3ovb.pdb	D	B	-3.9851	-9.61432	HOW THE CCA-ADDING ENZYME SELECTS ADENINE OVER CYTOSINE IN POSITION 76
3pew.pdb	B	A	-1.18442	-6.53308	S. CEREVISIAE DBP5 L327V BOUND TO RNA AND ADP BEF3
3pey.pdb	B	A	-1.18442	-6.54991	S. CEREVISIAE DBP5 BOUND TO RNA AND ADP BEF3
3pf4.pdb	R	A	-0.540568	-8.08746	CRYSTAL STRUCTURE OF BS-CSPB IN COMPLEX WITH R(GUCUUUA)
3pf4.pdb	R	B	-0.540568	-8.16993	CRYSTAL STRUCTURE OF BS-CSPB IN COMPLEX WITH R(GUCUUUA)
3pf5.pdb	R	A	-0.943416	-8.40939	CRYSTAL STRUCTURE OF BS-CSPB IN COMPLEX WITH RU6
3pf5.pdb	R	B	-0.943416	-8.47168	CRYSTAL STRUCTURE OF BS-CSPB IN COMPLEX WITH RU6
3q0q.pdb	B	A	-1.46949	-9.42206	CRYSTAL STRUCTURE OF THE PUMILIO-HOMOLOGY DOMAIN FROM HUMAN PUMILIO2
3q0r.pdb	B	A	-1.46949	-9.42206	CRYSTAL STRUCTURE OF THE PUMILIO-HOMOLOGY DOMAIN FROM HUMAN PUMILIO2
3q0s.pdb	B	A	-1.46949	-11.007	CRYSTAL STRUCTURE OF THE PUMILIO-HOMOLOGY DOMAIN FROM HUMAN PUMILIO2
3qgc.pdb	B	A	-1.70782	-11.4512	CRYSTAL STRUCTURE OF FBF-2 R288Y MUTANT IN COMPLEX WITH GLD-1 FBEA A7U
3r2c.pdb	S	A	-1.91254	-10.1599	CRYSTAL STRUCTURE OF ANTITERMINATION FACTORS NUSB AND NUSE IN COMPLEX
3r2c.pdb	S	B	-1.91254	-7.51307	CRYSTAL STRUCTURE OF ANTITERMINATION FACTORS NUSB AND NUSE IN COMPLEX
3r2c.pdb	S	J	-1.91254	-9.30378	CRYSTAL STRUCTURE OF ANTITERMINATION FACTORS NUSB AND NUSE IN COMPLEX
3r2c.pdb	S	K	-1.91254	-9.33985	CRYSTAL STRUCTURE OF ANTITERMINATION FACTORS NUSB AND NUSE IN COMPLEX
3r2c.pdb	R	A	-1.70782	-6.6453	CRYSTAL STRUCTURE OF ANTITERMINATION FACTORS NUSB AND NUSE IN COMPLEX
3r2c.pdb	R	B	-1.70782	-9.90539	CRYSTAL STRUCTURE OF ANTITERMINATION FACTORS NUSB AND NUSE IN COMPLEX
3r2c.pdb	R	J	-1.70782	-9.11114	CRYSTAL STRUCTURE OF ANTITERMINATION FACTORS NUSB AND NUSE IN COMPLEX
3r2c.pdb	R	K	-1.70782	-9.1472	CRYSTAL STRUCTURE OF ANTITERMINATION FACTORS NUSB AND NUSE IN COMPLEX
3rer.pdb	K	A	-1.46949	-6.53916	CRYSTAL STRUCTURE OF E. COLI HFQ IN COMPLEX WITH AU6A RNA AND ADP
3rer.pdb	K	C	-1.46949	-6.58496	CRYSTAL STRUCTURE OF E. COLI HFQ IN COMPLEX WITH AU6A RNA AND ADP
3rer.pdb	K	B	-1.46949	-6.9542	CRYSTAL STRUCTURE OF E. COLI HFQ IN COMPLEX WITH AU6A RNA AND ADP
3rer.pdb	K	E	-1.46949	-6.93074	CRYSTAL STRUCTURE OF E. COLI HFQ IN COMPLEX WITH AU6A RNA AND ADP
3rer.pdb	K	D	-1.46949	-6.49185	CRYSTAL STRUCTURE OF E. COLI HFQ IN COMPLEX WITH AU6A RNA AND ADP
3rer.pdb	K	F	-1.46949	-6.5157	CRYSTAL STRUCTURE OF E. COLI HFQ IN COMPLEX WITH AU6A RNA AND ADP
3sqw.pdb	B	A	-1.70782	-7.0609	STRUCTURE OF MSS116P (NTE DELETION) BOUND TO SSRNA AND AMP-PNP
3t5n.pdb	C	A	-1.18442	-5.82273	1.8A CRYSTAL STRUCTURE OF LASSA VIRUS NUCLEOPROTEIN IN COMPLEX WITH
3u4m.pdb	B	A	-5.22386	-9.35441	CRYSTAL STRUCTURE OF RIBOSOMAL PROTEIN TTHL1 IN COMPLEX WITH 80NT 23S
3umy.pdb	B	A	-5.17293	-9.14298	CRYSTAL STRUCTURE OF MUTANT RIBOSOMAL PROTEIN T217A TTHL1 IN COMPLEX
3wbm.pdb	Y	A	-3.49254	-10.9498	CRYSTAL STRUCTURE OF PROTEIN-RNA COMPLEX
3wbm.pdb	Y	C	-3.49254	-7.24939	CRYSTAL STRUCTURE OF PROTEIN-RNA COMPLEX
3wbm.pdb	Y	B	-3.49254	-8.33092	CRYSTAL STRUCTURE OF PROTEIN-RNA COMPLEX
3wbm.pdb	Y	D	-3.49254	-10.9993	CRYSTAL STRUCTURE OF PROTEIN-RNA COMPLEX
3wbm.pdb	X	A	-3.49254	-7.04294	CRYSTAL STRUCTURE OF PROTEIN-RNA COMPLEX
3wbm.pdb	X	C	-3.49254	-9.94983	CRYSTAL STRUCTURE OF PROTEIN-RNA COMPLEX
3wbm.pdb	X	B	-3.49254	-10.9159	CRYSTAL STRUCTURE OF PROTEIN-RNA COMPLEX
3wbm.pdb	X	D	-3.49254	-10.9993	CRYSTAL STRUCTURE OF PROTEIN-RNA COMPLEX
4al5.pdb	B	A	-2.95561	-7.32193	CRYSTAL STRUCTURE OF THE CSY4-CRRNA PRODUCT COMPLEX
4alp.pdb	E	A	-0.830075	-8.50779	THE LIN28B COLD SHOCK DOMAIN IN COMPLEX WITH HEXAURIDINE
4alp.pdb	E	C	-0.830075	-8.53916	THE LIN28B COLD SHOCK DOMAIN IN COMPLEX WITH HEXAURIDINE
4alp.pdb	E	B	-0.830075	-8.49185	THE LIN28B COLD SHOCK DOMAIN IN COMPLEX WITH HEXAURIDINE
4alp.pdb	E	D	-0.830075	-7.47573	THE LIN28B COLD SHOCK DOMAIN IN COMPLEX WITH HEXAURIDINE
4arc.pdb	B	A	-5.07866	-11.337	TERNARY COMPLEX OF E. COLI LEUCYL-TRNA SYNTHETASE, TRNA(LEU)
4c8y.pdb	C	A	-2.67094	-6.96193	CAS6 (TTHA0078) SUBSTRATE MIMIC COMPLEX
4c8y.pdb	C	B	-2.67094	-9.71996	CAS6 (TTHA0078) SUBSTRATE MIMIC COMPLEX
4d25.pdb	D	A	-1.18442	-6.4363	CRYSTAL STRUCTURE OF THE BOMBYX MORI VASA HELICASE (E339Q)
4ed5.pdb	C	A	-2.09311	-10.4094	CRYSTAL STRUCTURE OF THE TWO N-TERMINAL RRM DOMAINS OF HUR COMPLEXED
4ed5.pdb	C	B	-2.09311	-7.41785	CRYSTAL STRUCTURE OF THE TWO N-TERMINAL RRM DOMAINS OF HUR COMPLEXED
4ed5.pdb	D	A	-1.75207	-7.40939	CRYSTAL STRUCTURE OF THE TWO N-TERMINAL RRM DOMAINS OF HUR COMPLEXED
4ed5.pdb	D	B	-1.75207	-10.4179	CRYSTAL STRUCTURE OF THE TWO N-TERMINAL RRM DOMAINS OF HUR COMPLEXED
4f02.pdb	B	A	-1.70782	-7.08864	CRYSTAL STRUCTURE OF THE PABP-BINDING SITE OF EIF4G IN COMPLEX WITH
4f02.pdb	B	C	-1.70782	-7.12928	CRYSTAL STRUCTURE OF THE PABP-BINDING SITE OF EIF4G IN COMPLEX WITH
4f02.pdb	B	D	-1.70782	-9.26679	CRYSTAL STRUCTURE OF THE PABP-BINDING SITE OF EIF4G IN COMPLEX WITH
4f02.pdb	B	F	-1.70782	-7.12928	CRYSTAL STRUCTURE OF THE PABP-BINDING SITE OF EIF4G IN COMPLEX WITH
4f02.pdb	E	A	-1.91254	-9.45121	CRYSTAL STRUCTURE OF THE PABP-BINDING SITE OF EIF4G IN COMPLEX WITH
4f02.pdb	E	C	-1.91254	-7.32193	CRYSTAL STRUCTURE OF THE PABP-BINDING SITE OF EIF4G IN COMPLEX WITH
4f02.pdb	E	D	-1.91254	-7.45943	CRYSTAL STRUCTURE OF THE PABP-BINDING SITE OF EIF4G IN COMPLEX WITH
4f02.pdb	E	F	-1.91254	-7.32193	CRYSTAL STRUCTURE OF THE PABP-BINDING SITE OF EIF4G IN COMPLEX WITH
4gv3.pdb	C	A	-0.36257	-9.2854	STRUCTURES OF LASSA AND TACARIBE VIRAL NUCLEOPROTEINS WITH OR WITHOUT
4gv3.pdb	B	A	0.321928	-5.24101	STRUCTURES OF LASSA AND TACARIBE VIRAL NUCLEOPROTEINS WITH OR WITHOUT
4gv6.pdb	C	A	-0.36257	-9.2854	STRUCTURES OF LASSA AND TACARIBE VIRAL NUCLEOPROTEINS WITH OR WITHOUT
4gv6.pdb	B	A	0.321928	-5.37851	STRUCTURES OF LASSA AND TACARIBE VIRAL NUCLEOPROTEINS WITH OR WITHOUT
4hor.pdb	X	A	-0.540568	-8.61176	CRYSTAL STRUCTURE OF FULL-LENGTH HUMAN IFIT5 WITH 5`-TRIPHOSPHATE
4hos.pdb	X	A	0.321928	-8.33092	CRYSTAL STRUCTURE OF FULL-LENGTH HUMAN IFIT5 WITH 5`-TRIPHOSPHATE
4ht8.pdb	I	A	-1.8365	-6	CRYSTAL STRUCTURE OF E COLI HFQ BOUND TO POLY(A) A7
4ht8.pdb	I	C	-1.8365	-8.25267	CRYSTAL STRUCTURE OF E COLI HFQ BOUND TO POLY(A) A7
4ht8.pdb	I	B	-1.8365	-8.27612	CRYSTAL STRUCTURE OF E COLI HFQ BOUND TO POLY(A) A7
4ht8.pdb	I	E	-1.8365	-8.27612	CRYSTAL STRUCTURE OF E COLI HFQ BOUND TO POLY(A) A7
4ht8.pdb	I	D	-1.8365	-8.27612	CRYSTAL STRUCTURE OF E COLI HFQ BOUND TO POLY(A) A7
4ht8.pdb	I	F	-1.8365	-5.9542	CRYSTAL STRUCTURE OF E COLI HFQ BOUND TO POLY(A) A7
4ht8.pdb	K	A	-1.47393	-8.32193	CRYSTAL STRUCTURE OF E COLI HFQ BOUND TO POLY(A) A7
4ht8.pdb	K	C	-1.47393	-5.93074	CRYSTAL STRUCTURE OF E COLI HFQ BOUND TO POLY(A) A7
4ht8.pdb	K	B	-1.47393	-8.27612	CRYSTAL STRUCTURE OF E COLI HFQ BOUND TO POLY(A) A7
4ht8.pdb	K	E	-1.47393	-8.27612	CRYSTAL STRUCTURE OF E COLI HFQ BOUND TO POLY(A) A7
4ht8.pdb	K	D	-1.47393	-5.9542	CRYSTAL STRUCTURE OF E COLI HFQ BOUND TO POLY(A) A7
4ht8.pdb	K	F	-1.47393	-8.27612	CRYSTAL STRUCTURE OF E COLI HFQ BOUND TO POLY(A) A7
4ht9.pdb	E	A	1.58496	-4.41504	CRYSTAL STRUCTURE OF E COLI HFQ BOUND TO TWO RNAS
4ht9.pdb	E	C	1.58496	-3.93074	CRYSTAL STRUCTURE OF E COLI HFQ BOUND TO TWO RNAS
4ht9.pdb	E	B	1.58496	-6.02237	CRYSTAL STRUCTURE OF E COLI HFQ BOUND TO TWO RNAS
4ht9.pdb	D	A	-1.8365	-6	CRYSTAL STRUCTURE OF E COLI HFQ BOUND TO TWO RNAS
4ht9.pdb	D	C	-1.8365	-8.25267	CRYSTAL STRUCTURE OF E COLI HFQ BOUND TO TWO RNAS
4ht9.pdb	D	B	-1.8365	-6.02237	CRYSTAL STRUCTURE OF E COLI HFQ BOUND TO TWO RNAS
4ii9.pdb	C	A	1.58496	-7.40088	CRYSTAL STRUCTURE OF WEISSELLA VIRIDESCENS FEMXVV NON-RIBOSOMAL AMINO
4ii9.pdb	C	B	1.58496	-1	CRYSTAL STRUCTURE OF WEISSELLA VIRIDESCENS FEMXVV NON-RIBOSOMAL AMINO
4j39.pdb	B	A	-3.1383	-7.71923	CRYSTAL STRUCTURE OF P19 IN COMPLEX WITH DOUBLE-HELICAL 19MER RNA
4j7l.pdb	B	A	-0.830075	-6.92679	CRYSTAL STRUCTURE OF MOUSE DXO IN COMPLEX WITH PRODUCT RNA AND TWO
4j7m.pdb	B	A	-0.415037	-6.52748	CRYSTAL STRUCTURE OF MOUSE DXO IN COMPLEX WITH SUBSTRATE MIMIC RNA AND
4jgn.pdb	E	A	-3.21045	-7.04379	CRYSTAL STRUCTURE OF RNA SILENCING SUPPRESSOR P19 WITH 1NT-5'-
4jnx.pdb	B	A	-3.02825	-8.8802	CRYSTAL STRUCTURE OF RNA SILENCING SUPPRESSOR P19 COMPLEXED WITH
4jnx.pdb	B	D	-3.02825	-7.50168	CRYSTAL STRUCTURE OF RNA SILENCING SUPPRESSOR P19 COMPLEXED WITH
4jnx.pdb	G	A	-3.01204	-7.55827	CRYSTAL STRUCTURE OF RNA SILENCING SUPPRESSOR P19 COMPLEXED WITH
4jnx.pdb	G	D	-3.01204	-8.8802	CRYSTAL STRUCTURE OF RNA SILENCING SUPPRESSOR P19 COMPLEXED WITH
4knq.pdb	B	A	-3.21045	-7.17866	CRYSTAL STRUCTURE OF 1NT-5'-OVERHANGING DOUBLE-HELICAL CCG-REPETITIVE
4kre.pdb	R	A	-2.25239	-8.18428	STRUCTURE OF HUMAN ARGONAUTE-1 BOUND TO ENDOGENOUS SF9 RNA
4ktg.pdb	B	A	-3.1383	-7.35944	CRYSTAL STRUCTURE OF DOUBLE-HELICAL GGC-REPETITIVE RNA 19MER COMPLEXED
4ktg.pdb	E	A	-3.1383	-8.84486	CRYSTAL STRUCTURE OF DOUBLE-HELICAL GGC-REPETITIVE RNA 19MER COMPLEXED
4lgt.pdb	E	A	-3.2864	-7.48739	CRYSTAL STRUCTURE OF THE CATALYTIC DOMAIN OF RLUB IN COMPLEX WITH A
4lgt.pdb	E	D	-3.2864	-11.2137	CRYSTAL STRUCTURE OF THE CATALYTIC DOMAIN OF RLUB IN COMPLEX WITH A
4lgt.pdb	F	A	-3.21057	-10.5793	CRYSTAL STRUCTURE OF THE CATALYTIC DOMAIN OF RLUB IN COMPLEX WITH A
4lgt.pdb	F	D	-3.21057	-7.38082	CRYSTAL STRUCTURE OF THE CATALYTIC DOMAIN OF RLUB IN COMPLEX WITH A
4m4o.pdb	B	A	-4.75018	-10.8914	CRYSTAL STRUCTURE OF THE APTAMER MINE-LYSOZYME COMPLEX
4mdx.pdb	C	A	-1.70782	-8.11721	CRYSTAL STRUCTURE OF BACILLUS SUBTILIS MAZF IN COMPLEX WITH RNA
4mdx.pdb	C	B	-1.70782	-7.12928	CRYSTAL STRUCTURE OF BACILLUS SUBTILIS MAZF IN COMPLEX WITH RNA
4n0t.pdb	B	A	-4.98877	-10.1859	CORE STRUCTURE OF THE U6 SMALL NUCLEAR RIBONUCLEOPROTEIN AT 1.7
4ngd.pdb	B	A	-2.3953	-9.29232	STRUCTURE OF HUMAN DICER PLATFORM-PAZ-CONNECTOR HELIX CASSETTE IN
4nia.pdb	1	A	1.58496	-7.35755	SATELLITE TOBACCO MOSAIC VIRUS REFINED AT ROOM TEMPERATURE TO 1.8 A
4nia.pdb	1	C	1.58496	-7.34873	SATELLITE TOBACCO MOSAIC VIRUS REFINED AT ROOM TEMPERATURE TO 1.8 A
4nia.pdb	1	B	1.58496	-7.31288	SATELLITE TOBACCO MOSAIC VIRUS REFINED AT ROOM TEMPERATURE TO 1.8 A
4nia.pdb	1	E	1.58496	-7.32193	SATELLITE TOBACCO MOSAIC VIRUS REFINED AT ROOM TEMPERATURE TO 1.8 A
4nia.pdb	1	D	1.58496	-7.36632	SATELLITE TOBACCO MOSAIC VIRUS REFINED AT ROOM TEMPERATURE TO 1.8 A
4nia.pdb	1	G	1.58496	-7.31288	SATELLITE TOBACCO MOSAIC VIRUS REFINED AT ROOM TEMPERATURE TO 1.8 A
4nia.pdb	1	F	1.58496	-7.33092	SATELLITE TOBACCO MOSAIC VIRUS REFINED AT ROOM TEMPERATURE TO 1.8 A
4nia.pdb	1	I	1.58496	-7.31288	SATELLITE TOBACCO MOSAIC VIRUS REFINED AT ROOM TEMPERATURE TO 1.8 A
4nia.pdb	1	H	1.58496	-5.01792	SATELLITE TOBACCO MOSAIC VIRUS REFINED AT ROOM TEMPERATURE TO 1.8 A
4nia.pdb	1	K	1.58496	-7.32193	SATELLITE TOBACCO MOSAIC VIRUS REFINED AT ROOM TEMPERATURE TO 1.8 A
4nia.pdb	1	J	1.58496	-7.33985	SATELLITE TOBACCO MOSAIC VIRUS REFINED AT ROOM TEMPERATURE TO 1.8 A
4nia.pdb	1	M	1.58496	-7.29462	SATELLITE TOBACCO MOSAIC VIRUS REFINED AT ROOM TEMPERATURE TO 1.8 A
4nia.pdb	1	L	1.58496	-7.31288	SATELLITE TOBACCO MOSAIC VIRUS REFINED AT ROOM TEMPERATURE TO 1.8 A
4nia.pdb	1	O	1.58496	-7.33092	SATELLITE TOBACCO MOSAIC VIRUS REFINED AT ROOM TEMPERATURE TO 1.8 A
4nia.pdb	1	N	1.58496	-7.33092	SATELLITE TOBACCO MOSAIC VIRUS REFINED AT ROOM TEMPERATURE TO 1.8 A
4nia.pdb	3	A	1.58496	-7.35755	SATELLITE TOBACCO MOSAIC VIRUS REFINED AT ROOM TEMPERATURE TO 1.8 A
4nia.pdb	3	C	1.58496	-7.34873	SATELLITE TOBACCO MOSAIC VIRUS REFINED AT ROOM TEMPERATURE TO 1.8 A
4nia.pdb	3	B	1.58496	-7.31288	SATELLITE TOBACCO MOSAIC VIRUS REFINED AT ROOM TEMPERATURE TO 1.8 A
4nia.pdb	3	E	1.58496	-7.32193	SATELLITE TOBACCO MOSAIC VIRUS REFINED AT ROOM TEMPERATURE TO 1.8 A
4nia.pdb	3	D	1.58496	-7.36632	SATELLITE TOBACCO MOSAIC VIRUS REFINED AT ROOM TEMPERATURE TO 1.8 A
4nia.pdb	3	G	1.58496	-7.31288	SATELLITE TOBACCO MOSAIC VIRUS REFINED AT ROOM TEMPERATURE TO 1.8 A
4nia.pdb	3	F	1.58496	-7.33092	SATELLITE TOBACCO MOSAIC VIRUS REFINED AT ROOM TEMPERATURE TO 1.8 A
4nia.pdb	3	I	1.58496	-7.31288	SATELLITE TOBACCO MOSAIC VIRUS REFINED AT ROOM TEMPERATURE TO 1.8 A
4nia.pdb	3	H	1.58496	-7.33985	SATELLITE TOBACCO MOSAIC VIRUS REFINED AT ROOM TEMPERATURE TO 1.8 A
4nia.pdb	3	K	1.58496	-6.32193	SATELLITE TOBACCO MOSAIC VIRUS REFINED AT ROOM TEMPERATURE TO 1.8 A
4nia.pdb	3	J	1.58496	-5.01792	SATELLITE TOBACCO MOSAIC VIRUS REFINED AT ROOM TEMPERATURE TO 1.8 A
4nia.pdb	3	M	1.58496	-7.29462	SATELLITE TOBACCO MOSAIC VIRUS REFINED AT ROOM TEMPERATURE TO 1.8 A
4nia.pdb	3	L	1.58496	-7.31288	SATELLITE TOBACCO MOSAIC VIRUS REFINED AT ROOM TEMPERATURE TO 1.8 A
4nia.pdb	3	O	1.58496	-7.33092	SATELLITE TOBACCO MOSAIC VIRUS REFINED AT ROOM TEMPERATURE TO 1.8 A
4nia.pdb	3	N	1.58496	-7.33092	SATELLITE TOBACCO MOSAIC VIRUS REFINED AT ROOM TEMPERATURE TO 1.8 A
4nia.pdb	2	A	1.58496	-7.35755	SATELLITE TOBACCO MOSAIC VIRUS REFINED AT ROOM TEMPERATURE TO 1.8 A
4nia.pdb	2	C	1.58496	-7.34873	SATELLITE TOBACCO MOSAIC VIRUS REFINED AT ROOM TEMPERATURE TO 1.8 A
4nia.pdb	2	B	1.58496	-7.31288	SATELLITE TOBACCO MOSAIC VIRUS REFINED AT ROOM TEMPERATURE TO 1.8 A
4nia.pdb	2	E	1.58496	-7.32193	SATELLITE TOBACCO MOSAIC VIRUS REFINED AT ROOM TEMPERATURE TO 1.8 A
4nia.pdb	2	D	1.58496	-7.36632	SATELLITE TOBACCO MOSAIC VIRUS REFINED AT ROOM TEMPERATURE TO 1.8 A
4nia.pdb	2	G	1.58496	-7.31288	SATELLITE TOBACCO MOSAIC VIRUS REFINED AT ROOM TEMPERATURE TO 1.8 A
4nia.pdb	2	F	1.58496	-7.33092	SATELLITE TOBACCO MOSAIC VIRUS REFINED AT ROOM TEMPERATURE TO 1.8 A
4nia.pdb	2	I	1.58496	-5.72792	SATELLITE TOBACCO MOSAIC VIRUS REFINED AT ROOM TEMPERATURE TO 1.8 A
4nia.pdb	2	H	1.58496	-7.33985	SATELLITE TOBACCO MOSAIC VIRUS REFINED AT ROOM TEMPERATURE TO 1.8 A
4nia.pdb	2	K	1.58496	-7.32193	SATELLITE TOBACCO MOSAIC VIRUS REFINED AT ROOM TEMPERATURE TO 1.8 A
4nia.pdb	2	J	1.58496	-7.33985	SATELLITE TOBACCO MOSAIC VIRUS REFINED AT ROOM TEMPERATURE TO 1.8 A
4nia.pdb	2	M	1.58496	-7.29462	SATELLITE TOBACCO MOSAIC VIRUS REFINED AT ROOM TEMPERATURE TO 1.8 A
4nia.pdb	2	L	1.58496	-7.31288	SATELLITE TOBACCO MOSAIC VIRUS REFINED AT ROOM TEMPERATURE TO 1.8 A
4nia.pdb	2	O	1.58496	-7.33092	SATELLITE TOBACCO MOSAIC VIRUS REFINED AT ROOM TEMPERATURE TO 1.8 A
4nia.pdb	2	N	1.58496	-7.33092	SATELLITE TOBACCO MOSAIC VIRUS REFINED AT ROOM TEMPERATURE TO 1.8 A
4nia.pdb	5	A	1.58496	-7.35755	SATELLITE TOBACCO MOSAIC VIRUS REFINED AT ROOM TEMPERATURE TO 1.8 A
4nia.pdb	5	C	1.58496	-7.34873	SATELLITE TOBACCO MOSAIC VIRUS REFINED AT ROOM TEMPERATURE TO 1.8 A
4nia.pdb	5	B	1.58496	-7.31288	SATELLITE TOBACCO MOSAIC VIRUS REFINED AT ROOM TEMPERATURE TO 1.8 A
4nia.pdb	5	E	1.58496	-7.32193	SATELLITE TOBACCO MOSAIC VIRUS REFINED AT ROOM TEMPERATURE TO 1.8 A
4nia.pdb	5	D	1.58496	-7.36632	SATELLITE TOBACCO MOSAIC VIRUS REFINED AT ROOM TEMPERATURE TO 1.8 A
4nia.pdb	5	G	1.58496	-7.31288	SATELLITE TOBACCO MOSAIC VIRUS REFINED AT ROOM TEMPERATURE TO 1.8 A
4nia.pdb	5	F	1.58496	-7.33092	SATELLITE TOBACCO MOSAIC VIRUS REFINED AT ROOM TEMPERATURE TO 1.8 A
4nia.pdb	5	I	1.58496	-7.31288	SATELLITE TOBACCO MOSAIC VIRUS REFINED AT ROOM TEMPERATURE TO 1.8 A
4nia.pdb	5	H	1.58496	-7.33985	SATELLITE TOBACCO MOSAIC VIRUS REFINED AT ROOM TEMPERATURE TO 1.8 A
4nia.pdb	5	K	1.58496	-7.32193	SATELLITE TOBACCO MOSAIC VIRUS REFINED AT ROOM TEMPERATURE TO 1.8 A
4nia.pdb	5	J	1.58496	-7.33985	SATELLITE TOBACCO MOSAIC VIRUS REFINED AT ROOM TEMPERATURE TO 1.8 A
4nia.pdb	5	M	1.58496	-7.29462	SATELLITE TOBACCO MOSAIC VIRUS REFINED AT ROOM TEMPERATURE TO 1.8 A
4nia.pdb	5	L	1.58496	-4.99095	SATELLITE TOBACCO MOSAIC VIRUS REFINED AT ROOM TEMPERATURE TO 1.8 A
4nia.pdb	5	O	1.58496	-7.33092	SATELLITE TOBACCO MOSAIC VIRUS REFINED AT ROOM TEMPERATURE TO 1.8 A
4nia.pdb	5	N	1.58496	-7.33092	SATELLITE TOBACCO MOSAIC VIRUS REFINED AT ROOM TEMPERATURE TO 1.8 A
4nia.pdb	4	A	1.58496	-7.35755	SATELLITE TOBACCO MOSAIC VIRUS REFINED AT ROOM TEMPERATURE TO 1.8 A
4nia.pdb	4	C	1.58496	-7.34873	SATELLITE TOBACCO MOSAIC VIRUS REFINED AT ROOM TEMPERATURE TO 1.8 A
4nia.pdb	4	B	1.58496	-7.31288	SATELLITE TOBACCO MOSAIC VIRUS REFINED AT ROOM TEMPERATURE TO 1.8 A
4nia.pdb	4	E	1.58496	-7.32193	SATELLITE TOBACCO MOSAIC VIRUS REFINED AT ROOM TEMPERATURE TO 1.8 A
4nia.pdb	4	D	1.58496	-7.36632	SATELLITE TOBACCO MOSAIC VIRUS REFINED AT ROOM TEMPERATURE TO 1.8 A
4nia.pdb	4	G	1.58496	-7.31288	SATELLITE TOBACCO MOSAIC VIRUS REFINED AT ROOM TEMPERATURE TO 1.8 A
4nia.pdb	4	F	1.58496	-7.33092	SATELLITE TOBACCO MOSAIC VIRUS REFINED AT ROOM TEMPERATURE TO 1.8 A
4nia.pdb	4	I	1.58496	-7.31288	SATELLITE TOBACCO MOSAIC VIRUS REFINED AT ROOM TEMPERATURE TO 1.8 A
4nia.pdb	4	H	1.58496	-7.33985	SATELLITE TOBACCO MOSAIC VIRUS REFINED AT ROOM TEMPERATURE TO 1.8 A
4nia.pdb	4	K	1.58496	-5	SATELLITE TOBACCO MOSAIC VIRUS REFINED AT ROOM TEMPERATURE TO 1.8 A
4nia.pdb	4	J	1.58496	-6.33985	SATELLITE TOBACCO MOSAIC VIRUS REFINED AT ROOM TEMPERATURE TO 1.8 A
4nia.pdb	4	M	1.58496	-7.29462	SATELLITE TOBACCO MOSAIC VIRUS REFINED AT ROOM TEMPERATURE TO 1.8 A
4nia.pdb	4	L	1.58496	-7.31288	SATELLITE TOBACCO MOSAIC VIRUS REFINED AT ROOM TEMPERATURE TO 1.8 A
4nia.pdb	4	O	1.58496	-7.33092	SATELLITE TOBACCO MOSAIC VIRUS REFINED AT ROOM TEMPERATURE TO 1.8 A
4nia.pdb	4	N	1.58496	-7.33092	SATELLITE TOBACCO MOSAIC VIRUS REFINED AT ROOM TEMPERATURE TO 1.8 A
4nia.pdb	7	A	1.58496	-7.35755	SATELLITE TOBACCO MOSAIC VIRUS REFINED AT ROOM TEMPERATURE TO 1.8 A
4nia.pdb	7	C	1.58496	-7.34873	SATELLITE TOBACCO MOSAIC VIRUS REFINED AT ROOM TEMPERATURE TO 1.8 A
4nia.pdb	7	B	1.58496	-7.31288	SATELLITE TOBACCO MOSAIC VIRUS REFINED AT ROOM TEMPERATURE TO 1.8 A
4nia.pdb	7	E	1.58496	-7.32193	SATELLITE TOBACCO MOSAIC VIRUS REFINED AT ROOM TEMPERATURE TO 1.8 A
4nia.pdb	7	D	1.58496	-7.36632	SATELLITE TOBACCO MOSAIC VIRUS REFINED AT ROOM TEMPERATURE TO 1.8 A
4nia.pdb	7	G	1.58496	-7.31288	SATELLITE TOBACCO MOSAIC VIRUS REFINED AT ROOM TEMPERATURE TO 1.8 A
4nia.pdb	7	F	1.58496	-7.33092	SATELLITE TOBACCO MOSAIC VIRUS REFINED AT ROOM TEMPERATURE TO 1.8 A
4nia.pdb	7	I	1.58496	-7.31288	SATELLITE TOBACCO MOSAIC VIRUS REFINED AT ROOM TEMPERATURE TO 1.8 A
4nia.pdb	7	H	1.58496	-7.33985	SATELLITE TOBACCO MOSAIC VIRUS REFINED AT ROOM TEMPERATURE TO 1.8 A
4nia.pdb	7	K	1.58496	-7.32193	SATELLITE TOBACCO MOSAIC VIRUS REFINED AT ROOM TEMPERATURE TO 1.8 A
4nia.pdb	7	J	1.58496	-7.33985	SATELLITE TOBACCO MOSAIC VIRUS REFINED AT ROOM TEMPERATURE TO 1.8 A
4nia.pdb	7	M	1.58496	-7.29462	SATELLITE TOBACCO MOSAIC VIRUS REFINED AT ROOM TEMPERATURE TO 1.8 A
4nia.pdb	7	L	1.58496	-7.31288	SATELLITE TOBACCO MOSAIC VIRUS REFINED AT ROOM TEMPERATURE TO 1.8 A
4nia.pdb	7	O	1.58496	-7.33092	SATELLITE TOBACCO MOSAIC VIRUS REFINED AT ROOM TEMPERATURE TO 1.8 A
4nia.pdb	7	N	1.58496	-5.00899	SATELLITE TOBACCO MOSAIC VIRUS REFINED AT ROOM TEMPERATURE TO 1.8 A
4nia.pdb	6	A	1.58496	-7.35755	SATELLITE TOBACCO MOSAIC VIRUS REFINED AT ROOM TEMPERATURE TO 1.8 A
4nia.pdb	6	C	1.58496	-7.34873	SATELLITE TOBACCO MOSAIC VIRUS REFINED AT ROOM TEMPERATURE TO 1.8 A
4nia.pdb	6	B	1.58496	-7.31288	SATELLITE TOBACCO MOSAIC VIRUS REFINED AT ROOM TEMPERATURE TO 1.8 A
4nia.pdb	6	E	1.58496	-7.32193	SATELLITE TOBACCO MOSAIC VIRUS REFINED AT ROOM TEMPERATURE TO 1.8 A
4nia.pdb	6	D	1.58496	-7.36632	SATELLITE TOBACCO MOSAIC VIRUS REFINED AT ROOM TEMPERATURE TO 1.8 A
4nia.pdb	6	G	1.58496	-7.31288	SATELLITE TOBACCO MOSAIC VIRUS REFINED AT ROOM TEMPERATURE TO 1.8 A
4nia.pdb	6	F	1.58496	-7.33092	SATELLITE TOBACCO MOSAIC VIRUS REFINED AT ROOM TEMPERATURE TO 1.8 A
4nia.pdb	6	I	1.58496	-7.31288	SATELLITE TOBACCO MOSAIC VIRUS REFINED AT ROOM TEMPERATURE TO 1.8 A
4nia.pdb	6	H	1.58496	-7.33985	SATELLITE TOBACCO MOSAIC VIRUS REFINED AT ROOM TEMPERATURE TO 1.8 A
4nia.pdb	6	K	1.58496	-7.32193	SATELLITE TOBACCO MOSAIC VIRUS REFINED AT ROOM TEMPERATURE TO 1.8 A
4nia.pdb	6	J	1.58496	-7.33985	SATELLITE TOBACCO MOSAIC VIRUS REFINED AT ROOM TEMPERATURE TO 1.8 A
4nia.pdb	6	M	1.58496	-5.29462	SATELLITE TOBACCO MOSAIC VIRUS REFINED AT ROOM TEMPERATURE TO 1.8 A
4nia.pdb	6	L	1.58496	-7.31288	SATELLITE TOBACCO MOSAIC VIRUS REFINED AT ROOM TEMPERATURE TO 1.8 A
4nia.pdb	6	O	1.58496	-7.33092	SATELLITE TOBACCO MOSAIC VIRUS REFINED AT ROOM TEMPERATURE TO 1.8 A
4nia.pdb	6	N	1.58496	-7.33092	SATELLITE TOBACCO MOSAIC VIRUS REFINED AT ROOM TEMPERATURE TO 1.8 A
4nia.pdb	8	A	1.58496	-6.35755	SATELLITE TOBACCO MOSAIC VIRUS REFINED AT ROOM TEMPERATURE TO 1.8 A
4nia.pdb	8	C	1.58496	-7.34873	SATELLITE TOBACCO MOSAIC VIRUS REFINED AT ROOM TEMPERATURE TO 1.8 A
4nia.pdb	8	B	1.58496	-7.31288	SATELLITE TOBACCO MOSAIC VIRUS REFINED AT ROOM TEMPERATURE TO 1.8 A
4nia.pdb	8	E	1.58496	-7.32193	SATELLITE TOBACCO MOSAIC VIRUS REFINED AT ROOM TEMPERATURE TO 1.8 A
4nia.pdb	8	D	1.58496	-7.36632	SATELLITE TOBACCO MOSAIC VIRUS REFINED AT ROOM TEMPERATURE TO 1.8 A
4nia.pdb	8	G	1.58496	-7.31288	SATELLITE TOBACCO MOSAIC VIRUS REFINED AT ROOM TEMPERATURE TO 1.8 A
4nia.pdb	8	F	1.58496	-7.33092	SATELLITE TOBACCO MOSAIC VIRUS REFINED AT ROOM TEMPERATURE TO 1.8 A
4nia.pdb	8	I	1.58496	-7.31288	SATELLITE TOBACCO MOSAIC VIRUS REFINED AT ROOM TEMPERATURE TO 1.8 A
4nia.pdb	8	H	1.58496	-7.33985	SATELLITE TOBACCO MOSAIC VIRUS REFINED AT ROOM TEMPERATURE TO 1.8 A
4nia.pdb	8	K	1.58496	-7.32193	SATELLITE TOBACCO MOSAIC VIRUS REFINED AT ROOM TEMPERATURE TO 1.8 A
4nia.pdb	8	J	1.58496	-7.33985	SATELLITE TOBACCO MOSAIC VIRUS REFINED AT ROOM TEMPERATURE TO 1.8 A
4nia.pdb	8	M	1.58496	-7.29462	SATELLITE TOBACCO MOSAIC VIRUS REFINED AT ROOM TEMPERATURE TO 1.8 A
4nia.pdb	8	L	1.58496	-7.31288	SATELLITE TOBACCO MOSAIC VIRUS REFINED AT ROOM TEMPERATURE TO 1.8 A
4nia.pdb	8	O	1.58496	-5.00899	SATELLITE TOBACCO MOSAIC VIRUS REFINED AT ROOM TEMPERATURE TO 1.8 A
4nia.pdb	8	N	1.58496	-7.33092	SATELLITE TOBACCO MOSAIC VIRUS REFINED AT ROOM TEMPERATURE TO 1.8 A
4nia.pdb	Q	A	-2.09192	-10.5275	SATELLITE TOBACCO MOSAIC VIRUS REFINED AT ROOM TEMPERATURE TO 1.8 A
4nia.pdb	Q	C	-2.09192	-10.5187	SATELLITE TOBACCO MOSAIC VIRUS REFINED AT ROOM TEMPERATURE TO 1.8 A
4nia.pdb	Q	B	-2.09192	-9.48281	SATELLITE TOBACCO MOSAIC VIRUS REFINED AT ROOM TEMPERATURE TO 1.8 A
4nia.pdb	Q	E	-2.09192	-10.4919	SATELLITE TOBACCO MOSAIC VIRUS REFINED AT ROOM TEMPERATURE TO 1.8 A
4nia.pdb	Q	D	-2.09192	-10.5362	SATELLITE TOBACCO MOSAIC VIRUS REFINED AT ROOM TEMPERATURE TO 1.8 A
4nia.pdb	Q	G	-2.09192	-10.4828	SATELLITE TOBACCO MOSAIC VIRUS REFINED AT ROOM TEMPERATURE TO 1.8 A
4nia.pdb	Q	F	-2.09192	-10.5008	SATELLITE TOBACCO MOSAIC VIRUS REFINED AT ROOM TEMPERATURE TO 1.8 A
4nia.pdb	Q	I	-2.09192	-10.4828	SATELLITE TOBACCO MOSAIC VIRUS REFINED AT ROOM TEMPERATURE TO 1.8 A
4nia.pdb	Q	H	-2.09192	-10.5098	SATELLITE TOBACCO MOSAIC VIRUS REFINED AT ROOM TEMPERATURE TO 1.8 A
4nia.pdb	Q	K	-2.09192	-10.4919	SATELLITE TOBACCO MOSAIC VIRUS REFINED AT ROOM TEMPERATURE TO 1.8 A
4nia.pdb	Q	J	-2.09192	-10.5098	SATELLITE TOBACCO MOSAIC VIRUS REFINED AT ROOM TEMPERATURE TO 1.8 A
4nia.pdb	Q	M	-2.09192	-10.4645	SATELLITE TOBACCO MOSAIC VIRUS REFINED AT ROOM TEMPERATURE TO 1.8 A
4nia.pdb	Q	L	-2.09192	-10.4828	SATELLITE TOBACCO MOSAIC VIRUS REFINED AT ROOM TEMPERATURE TO 1.8 A
4nia.pdb	Q	O	-2.09192	-10.5008	SATELLITE TOBACCO MOSAIC VIRUS REFINED AT ROOM TEMPERATURE TO 1.8 A
4nia.pdb	Q	N	-2.09192	-8.50084	SATELLITE TOBACCO MOSAIC VIRUS REFINED AT ROOM TEMPERATURE TO 1.8 A
4nia.pdb	P	A	-2.09192	-9.52748	SATELLITE TOBACCO MOSAIC VIRUS REFINED AT ROOM TEMPERATURE TO 1.8 A
4nia.pdb	P	C	-2.09192	-10.5187	SATELLITE TOBACCO MOSAIC VIRUS REFINED AT ROOM TEMPERATURE TO 1.8 A
4nia.pdb	P	B	-2.09192	-10.4828	SATELLITE TOBACCO MOSAIC VIRUS REFINED AT ROOM TEMPERATURE TO 1.8 A
4nia.pdb	P	E	-2.09192	-10.4919	SATELLITE TOBACCO MOSAIC VIRUS REFINED AT ROOM TEMPERATURE TO 1.8 A
4nia.pdb	P	D	-2.09192	-10.5362	SATELLITE TOBACCO MOSAIC VIRUS REFINED AT ROOM TEMPERATURE TO 1.8 A
4nia.pdb	P	G	-2.09192	-10.4828	SATELLITE TOBACCO MOSAIC VIRUS REFINED AT ROOM TEMPERATURE TO 1.8 A
4nia.pdb	P	F	-2.09192	-10.5008	SATELLITE TOBACCO MOSAIC VIRUS REFINED AT ROOM TEMPERATURE TO 1.8 A
4nia.pdb	P	I	-2.09192	-10.4828	SATELLITE TOBACCO MOSAIC VIRUS REFINED AT ROOM TEMPERATURE TO 1.8 A
4nia.pdb	P	H	-2.09192	-10.5098	SATELLITE TOBACCO MOSAIC VIRUS REFINED AT ROOM TEMPERATURE TO 1.8 A
4nia.pdb	P	K	-2.09192	-10.4919	SATELLITE TOBACCO MOSAIC VIRUS REFINED AT ROOM TEMPERATURE TO 1.8 A
4nia.pdb	P	J	-2.09192	-8.18785	SATELLITE TOBACCO MOSAIC VIRUS REFINED AT ROOM TEMPERATURE TO 1.8 A
4nia.pdb	P	M	-2.09192	-10.4645	SATELLITE TOBACCO MOSAIC VIRUS REFINED AT ROOM TEMPERATURE TO 1.8 A
4nia.pdb	P	L	-2.09192	-10.4828	SATELLITE TOBACCO MOSAIC VIRUS REFINED AT ROOM TEMPERATURE TO 1.8 A
4nia.pdb	P	O	-2.09192	-7.91588	SATELLITE TOBACCO MOSAIC VIRUS REFINED AT ROOM TEMPERATURE TO 1.8 A
4nia.pdb	P	N	-2.09192	-10.5008	SATELLITE TOBACCO MOSAIC VIRUS REFINED AT ROOM TEMPERATURE TO 1.8 A
4nia.pdb	S	A	-2.09192	-10.5275	SATELLITE TOBACCO MOSAIC VIRUS REFINED AT ROOM TEMPERATURE TO 1.8 A
4nia.pdb	S	C	-2.09192	-10.5187	SATELLITE TOBACCO MOSAIC VIRUS REFINED AT ROOM TEMPERATURE TO 1.8 A
4nia.pdb	S	B	-2.09192	-10.4828	SATELLITE TOBACCO MOSAIC VIRUS REFINED AT ROOM TEMPERATURE TO 1.8 A
4nia.pdb	S	E	-2.09192	-10.4919	SATELLITE TOBACCO MOSAIC VIRUS REFINED AT ROOM TEMPERATURE TO 1.8 A
4nia.pdb	S	D	-2.09192	-8.53625	SATELLITE TOBACCO MOSAIC VIRUS REFINED AT ROOM TEMPERATURE TO 1.8 A
4nia.pdb	S	G	-2.09192	-10.4828	SATELLITE TOBACCO MOSAIC VIRUS REFINED AT ROOM TEMPERATURE TO 1.8 A
4nia.pdb	S	F	-2.09192	-10.5008	SATELLITE TOBACCO MOSAIC VIRUS REFINED AT ROOM TEMPERATURE TO 1.8 A
4nia.pdb	S	I	-2.09192	-10.4828	SATELLITE TOBACCO MOSAIC VIRUS REFINED AT ROOM TEMPERATURE TO 1.8 A
4nia.pdb	S	H	-2.09192	-10.5098	SATELLITE TOBACCO MOSAIC VIRUS REFINED AT ROOM TEMPERATURE TO 1.8 A
4nia.pdb	S	K	-2.09192	-10.4919	SATELLITE TOBACCO MOSAIC VIRUS REFINED AT ROOM TEMPERATURE TO 1.8 A
4nia.pdb	S	J	-2.09192	-10.5098	SATELLITE TOBACCO MOSAIC VIRUS REFINED AT ROOM TEMPERATURE TO 1.8 A
4nia.pdb	S	M	-2.09192	-10.4645	SATELLITE TOBACCO MOSAIC VIRUS REFINED AT ROOM TEMPERATURE TO 1.8 A
4nia.pdb	S	L	-2.09192	-10.4828	SATELLITE TOBACCO MOSAIC VIRUS REFINED AT ROOM TEMPERATURE TO 1.8 A
4nia.pdb	S	O	-2.09192	-10.5008	SATELLITE TOBACCO MOSAIC VIRUS REFINED AT ROOM TEMPERATURE TO 1.8 A
4nia.pdb	S	N	-2.09192	-10.5008	SATELLITE TOBACCO MOSAIC VIRUS REFINED AT ROOM TEMPERATURE TO 1.8 A
4nia.pdb	R	A	-2.09192	-10.5275	SATELLITE TOBACCO MOSAIC VIRUS REFINED AT ROOM TEMPERATURE TO 1.8 A
4nia.pdb	R	C	-2.09192	-8.51865	SATELLITE TOBACCO MOSAIC VIRUS REFINED AT ROOM TEMPERATURE TO 1.8 A
4nia.pdb	R	B	-2.09192	-10.4828	SATELLITE TOBACCO MOSAIC VIRUS REFINED AT ROOM TEMPERATURE TO 1.8 A
4nia.pdb	R	E	-2.09192	-10.4919	SATELLITE TOBACCO MOSAIC VIRUS REFINED AT ROOM TEMPERATURE TO 1.8 A
4nia.pdb	R	D	-2.09192	-10.5362	SATELLITE TOBACCO MOSAIC VIRUS REFINED AT ROOM TEMPERATURE TO 1.8 A
4nia.pdb	R	G	-2.09192	-10.4828	SATELLITE TOBACCO MOSAIC VIRUS REFINED AT ROOM TEMPERATURE TO 1.8 A
4nia.pdb	R	F	-2.09192	-10.5008	SATELLITE TOBACCO MOSAIC VIRUS REFINED AT ROOM TEMPERATURE TO 1.8 A
4nia.pdb	R	I	-2.09192	-10.4828	SATELLITE TOBACCO MOSAIC VIRUS REFINED AT ROOM TEMPERATURE TO 1.8 A
4nia.pdb	R	H	-2.09192	-10.5098	SATELLITE TOBACCO MOSAIC VIRUS REFINED AT ROOM TEMPERATURE TO 1.8 A
4nia.pdb	R	K	-2.09192	-10.4919	SATELLITE TOBACCO MOSAIC VIRUS REFINED AT ROOM TEMPERATURE TO 1.8 A
4nia.pdb	R	J	-2.09192	-10.5098	SATELLITE TOBACCO MOSAIC VIRUS REFINED AT ROOM TEMPERATURE TO 1.8 A
4nia.pdb	R	M	-2.09192	-10.4645	SATELLITE TOBACCO MOSAIC VIRUS REFINED AT ROOM TEMPERATURE TO 1.8 A
4nia.pdb	R	L	-2.09192	-10.4828	SATELLITE TOBACCO MOSAIC VIRUS REFINED AT ROOM TEMPERATURE TO 1.8 A
4nia.pdb	R	O	-2.09192	-10.5008	SATELLITE TOBACCO MOSAIC VIRUS REFINED AT ROOM TEMPERATURE TO 1.8 A
4nia.pdb	R	N	-2.09192	-10.5008	SATELLITE TOBACCO MOSAIC VIRUS REFINED AT ROOM TEMPERATURE TO 1.8 A
4nia.pdb	U	A	-2.09192	-10.5275	SATELLITE TOBACCO MOSAIC VIRUS REFINED AT ROOM TEMPERATURE TO 1.8 A
4nia.pdb	U	C	-2.09192	-10.5187	SATELLITE TOBACCO MOSAIC VIRUS REFINED AT ROOM TEMPERATURE TO 1.8 A
4nia.pdb	U	B	-2.09192	-10.4828	SATELLITE TOBACCO MOSAIC VIRUS REFINED AT ROOM TEMPERATURE TO 1.8 A
4nia.pdb	U	E	-2.09192	-7.90689	SATELLITE TOBACCO MOSAIC VIRUS REFINED AT ROOM TEMPERATURE TO 1.8 A
4nia.pdb	U	D	-2.09192	-10.5362	SATELLITE TOBACCO MOSAIC VIRUS REFINED AT ROOM TEMPERATURE TO 1.8 A
4nia.pdb	U	G	-2.09192	-10.4828	SATELLITE TOBACCO MOSAIC VIRUS REFINED AT ROOM TEMPERATURE TO 1.8 A
4nia.pdb	U	F	-2.09192	-8.91588	SATELLITE TOBACCO MOSAIC VIRUS REFINED AT ROOM TEMPERATURE TO 1.8 A
4nia.pdb	U	I	-2.09192	-10.4828	SATELLITE TOBACCO MOSAIC VIRUS REFINED AT ROOM TEMPERATURE TO 1.8 A
4nia.pdb	U	H	-2.09192	-10.5098	SATELLITE TOBACCO MOSAIC VIRUS REFINED AT ROOM TEMPERATURE TO 1.8 A
4nia.pdb	U	K	-2.09192	-10.4919	SATELLITE TOBACCO MOSAIC VIRUS REFINED AT ROOM TEMPERATURE TO 1.8 A
4nia.pdb	U	J	-2.09192	-10.5098	SATELLITE TOBACCO MOSAIC VIRUS REFINED AT ROOM TEMPERATURE TO 1.8 A
4nia.pdb	U	M	-2.09192	-10.4645	SATELLITE TOBACCO MOSAIC VIRUS REFINED AT ROOM TEMPERATURE TO 1.8 A
4nia.pdb	U	L	-2.09192	-10.4828	SATELLITE TOBACCO MOSAIC VIRUS REFINED AT ROOM TEMPERATURE TO 1.8 A
4nia.pdb	U	O	-2.09192	-8.50084	SATELLITE TOBACCO MOSAIC VIRUS REFINED AT ROOM TEMPERATURE TO 1.8 A
4nia.pdb	U	N	-2.09192	-10.5008	SATELLITE TOBACCO MOSAIC VIRUS REFINED AT ROOM TEMPERATURE TO 1.8 A
4nia.pdb	T	A	-2.09192	-10.5275	SATELLITE TOBACCO MOSAIC VIRUS REFINED AT ROOM TEMPERATURE TO 1.8 A
4nia.pdb	T	C	-2.09192	-10.5187	SATELLITE TOBACCO MOSAIC VIRUS REFINED AT ROOM TEMPERATURE TO 1.8 A
4nia.pdb	T	B	-2.09192	-10.4828	SATELLITE TOBACCO MOSAIC VIRUS REFINED AT ROOM TEMPERATURE TO 1.8 A
4nia.pdb	T	E	-2.09192	-9.49185	SATELLITE TOBACCO MOSAIC VIRUS REFINED AT ROOM TEMPERATURE TO 1.8 A
4nia.pdb	T	D	-2.09192	-10.5362	SATELLITE TOBACCO MOSAIC VIRUS REFINED AT ROOM TEMPERATURE TO 1.8 A
4nia.pdb	T	G	-2.09192	-10.4828	SATELLITE TOBACCO MOSAIC VIRUS REFINED AT ROOM TEMPERATURE TO 1.8 A
4nia.pdb	T	F	-2.09192	-7.91588	SATELLITE TOBACCO MOSAIC VIRUS REFINED AT ROOM TEMPERATURE TO 1.8 A
4nia.pdb	T	I	-2.09192	-10.4828	SATELLITE TOBACCO MOSAIC VIRUS REFINED AT ROOM TEMPERATURE TO 1.8 A
4nia.pdb	T	H	-2.09192	-10.5098	SATELLITE TOBACCO MOSAIC VIRUS REFINED AT ROOM TEMPERATURE TO 1.8 A
4nia.pdb	T	K	-2.09192	-10.4919	SATELLITE TOBACCO MOSAIC VIRUS REFINED AT ROOM TEMPERATURE TO 1.8 A
4nia.pdb	T	J	-2.09192	-10.5098	SATELLITE TOBACCO MOSAIC VIRUS REFINED AT ROOM TEMPERATURE TO 1.8 A
4nia.pdb	T	M	-2.09192	-10.4645	SATELLITE TOBACCO MOSAIC VIRUS REFINED AT ROOM TEMPERATURE TO 1.8 A
4nia.pdb	T	L	-2.09192	-10.4828	SATELLITE TOBACCO MOSAIC VIRUS REFINED AT ROOM TEMPERATURE TO 1.8 A
4nia.pdb	T	O	-2.09192	-10.5008	SATELLITE TOBACCO MOSAIC VIRUS REFINED AT ROOM TEMPERATURE TO 1.8 A
4nia.pdb	T	N	-2.09192	-10.5008	SATELLITE TOBACCO MOSAIC VIRUS REFINED AT ROOM TEMPERATURE TO 1.8 A
4nia.pdb	W	A	-2.09192	-10.5275	SATELLITE TOBACCO MOSAIC VIRUS REFINED AT ROOM TEMPERATURE TO 1.8 A
4nia.pdb	W	C	-2.09192	-10.5187	SATELLITE TOBACCO MOSAIC VIRUS REFINED AT ROOM TEMPERATURE TO 1.8 A
4nia.pdb	W	B	-2.09192	-10.4828	SATELLITE TOBACCO MOSAIC VIRUS REFINED AT ROOM TEMPERATURE TO 1.8 A
4nia.pdb	W	E	-2.09192	-10.4919	SATELLITE TOBACCO MOSAIC VIRUS REFINED AT ROOM TEMPERATURE TO 1.8 A
4nia.pdb	W	D	-2.09192	-10.5362	SATELLITE TOBACCO MOSAIC VIRUS REFINED AT ROOM TEMPERATURE TO 1.8 A
4nia.pdb	W	G	-2.09192	-10.4828	SATELLITE TOBACCO MOSAIC VIRUS REFINED AT ROOM TEMPERATURE TO 1.8 A
4nia.pdb	W	F	-2.09192	-10.5008	SATELLITE TOBACCO MOSAIC VIRUS REFINED AT ROOM TEMPERATURE TO 1.8 A
4nia.pdb	W	I	-2.09192	-10.4828	SATELLITE TOBACCO MOSAIC VIRUS REFINED AT ROOM TEMPERATURE TO 1.8 A
4nia.pdb	W	H	-2.09192	-9.50978	SATELLITE TOBACCO MOSAIC VIRUS REFINED AT ROOM TEMPERATURE TO 1.8 A
4nia.pdb	W	K	-2.09192	-10.4919	SATELLITE TOBACCO MOSAIC VIRUS REFINED AT ROOM TEMPERATURE TO 1.8 A
4nia.pdb	W	J	-2.09192	-10.5098	SATELLITE TOBACCO MOSAIC VIRUS REFINED AT ROOM TEMPERATURE TO 1.8 A
4nia.pdb	W	M	-2.09192	-10.4645	SATELLITE TOBACCO MOSAIC VIRUS REFINED AT ROOM TEMPERATURE TO 1.8 A
4nia.pdb	W	L	-2.09192	-10.4828	SATELLITE TOBACCO MOSAIC VIRUS REFINED AT ROOM TEMPERATURE TO 1.8 A
4nia.pdb	W	O	-2.09192	-10.5008	SATELLITE TOBACCO MOSAIC VIRUS REFINED AT ROOM TEMPERATURE TO 1.8 A
4nia.pdb	W	N	-2.09192	-10.5008	SATELLITE TOBACCO MOSAIC VIRUS REFINED AT ROOM TEMPERATURE TO 1.8 A
4nia.pdb	V	A	-2.09192	-10.5275	SATELLITE TOBACCO MOSAIC VIRUS REFINED AT ROOM TEMPERATURE TO 1.8 A
4nia.pdb	V	C	-2.09192	-10.5187	SATELLITE TOBACCO MOSAIC VIRUS REFINED AT ROOM TEMPERATURE TO 1.8 A
4nia.pdb	V	B	-2.09192	-10.4828	SATELLITE TOBACCO MOSAIC VIRUS REFINED AT ROOM TEMPERATURE TO 1.8 A
4nia.pdb	V	E	-2.09192	-10.4919	SATELLITE TOBACCO MOSAIC VIRUS REFINED AT ROOM TEMPERATURE TO 1.8 A
4nia.pdb	V	D	-2.09192	-8.53625	SATELLITE TOBACCO MOSAIC VIRUS REFINED AT ROOM TEMPERATURE TO 1.8 A
4nia.pdb	V	G	-2.09192	-9.48281	SATELLITE TOBACCO MOSAIC VIRUS REFINED AT ROOM TEMPERATURE TO 1.8 A
4nia.pdb	V	F	-2.09192	-10.5008	SATELLITE TOBACCO MOSAIC VIRUS REFINED AT ROOM TEMPERATURE TO 1.8 A
4nia.pdb	V	I	-2.09192	-10.4828	SATELLITE TOBACCO MOSAIC VIRUS REFINED AT ROOM TEMPERATURE TO 1.8 A
4nia.pdb	V	H	-2.09192	-10.5098	SATELLITE TOBACCO MOSAIC VIRUS REFINED AT ROOM TEMPERATURE TO 1.8 A
4nia.pdb	V	K	-2.09192	-10.4919	SATELLITE TOBACCO MOSAIC VIRUS REFINED AT ROOM TEMPERATURE TO 1.8 A
4nia.pdb	V	J	-2.09192	-10.5098	SATELLITE TOBACCO MOSAIC VIRUS REFINED AT ROOM TEMPERATURE TO 1.8 A
4nia.pdb	V	M	-2.09192	-10.4645	SATELLITE TOBACCO MOSAIC VIRUS REFINED AT ROOM TEMPERATURE TO 1.8 A
4nia.pdb	V	L	-2.09192	-10.4828	SATELLITE TOBACCO MOSAIC VIRUS REFINED AT ROOM TEMPERATURE TO 1.8 A
4nia.pdb	V	O	-2.09192	-10.5008	SATELLITE TOBACCO MOSAIC VIRUS REFINED AT ROOM TEMPERATURE TO 1.8 A
4nia.pdb	V	N	-2.09192	-10.5008	SATELLITE TOBACCO MOSAIC VIRUS REFINED AT ROOM TEMPERATURE TO 1.8 A
4nia.pdb	Y	A	-2.09192	-10.5275	SATELLITE TOBACCO MOSAIC VIRUS REFINED AT ROOM TEMPERATURE TO 1.8 A
4nia.pdb	Y	C	-2.09192	-10.5187	SATELLITE TOBACCO MOSAIC VIRUS REFINED AT ROOM TEMPERATURE TO 1.8 A
4nia.pdb	Y	B	-2.09192	-10.4828	SATELLITE TOBACCO MOSAIC VIRUS REFINED AT ROOM TEMPERATURE TO 1.8 A
4nia.pdb	Y	E	-2.09192	-10.4919	SATELLITE TOBACCO MOSAIC VIRUS REFINED AT ROOM TEMPERATURE TO 1.8 A
4nia.pdb	Y	D	-2.09192	-10.5362	SATELLITE TOBACCO MOSAIC VIRUS REFINED AT ROOM TEMPERATURE TO 1.8 A
4nia.pdb	Y	G	-2.09192	-10.4828	SATELLITE TOBACCO MOSAIC VIRUS REFINED AT ROOM TEMPERATURE TO 1.8 A
4nia.pdb	Y	F	-2.09192	-10.5008	SATELLITE TOBACCO MOSAIC VIRUS REFINED AT ROOM TEMPERATURE TO 1.8 A
4nia.pdb	Y	I	-2.09192	-10.4828	SATELLITE TOBACCO MOSAIC VIRUS REFINED AT ROOM TEMPERATURE TO 1.8 A
4nia.pdb	Y	H	-2.09192	-10.5098	SATELLITE TOBACCO MOSAIC VIRUS REFINED AT ROOM TEMPERATURE TO 1.8 A
4nia.pdb	Y	K	-2.09192	-7.90689	SATELLITE TOBACCO MOSAIC VIRUS REFINED AT ROOM TEMPERATURE TO 1.8 A
4nia.pdb	Y	J	-2.09192	-8.92481	SATELLITE TOBACCO MOSAIC VIRUS REFINED AT ROOM TEMPERATURE TO 1.8 A
4nia.pdb	Y	M	-2.09192	-10.4645	SATELLITE TOBACCO MOSAIC VIRUS REFINED AT ROOM TEMPERATURE TO 1.8 A
4nia.pdb	Y	L	-2.09192	-10.4828	SATELLITE TOBACCO MOSAIC VIRUS REFINED AT ROOM TEMPERATURE TO 1.8 A
4nia.pdb	Y	O	-2.09192	-10.5008	SATELLITE TOBACCO MOSAIC VIRUS REFINED AT ROOM TEMPERATURE TO 1.8 A
4nia.pdb	Y	N	-2.09192	-10.5008	SATELLITE TOBACCO MOSAIC VIRUS REFINED AT ROOM TEMPERATURE TO 1.8 A
4nia.pdb	X	A	-2.09192	-10.5275	SATELLITE TOBACCO MOSAIC VIRUS REFINED AT ROOM TEMPERATURE TO 1.8 A
4nia.pdb	X	C	-2.09192	-10.5187	SATELLITE TOBACCO MOSAIC VIRUS REFINED AT ROOM TEMPERATURE TO 1.8 A
4nia.pdb	X	B	-2.09192	-10.4828	SATELLITE TOBACCO MOSAIC VIRUS REFINED AT ROOM TEMPERATURE TO 1.8 A
4nia.pdb	X	E	-2.09192	-10.4919	SATELLITE TOBACCO MOSAIC VIRUS REFINED AT ROOM TEMPERATURE TO 1.8 A
4nia.pdb	X	D	-2.09192	-10.5362	SATELLITE TOBACCO MOSAIC VIRUS REFINED AT ROOM TEMPERATURE TO 1.8 A
4nia.pdb	X	G	-2.09192	-10.4828	SATELLITE TOBACCO MOSAIC VIRUS REFINED AT ROOM TEMPERATURE TO 1.8 A
4nia.pdb	X	F	-2.09192	-10.5008	SATELLITE TOBACCO MOSAIC VIRUS REFINED AT ROOM TEMPERATURE TO 1.8 A
4nia.pdb	X	I	-2.09192	-9.48281	SATELLITE TOBACCO MOSAIC VIRUS REFINED AT ROOM TEMPERATURE TO 1.8 A
4nia.pdb	X	H	-2.09192	-10.5098	SATELLITE TOBACCO MOSAIC VIRUS REFINED AT ROOM TEMPERATURE TO 1.8 A
4nia.pdb	X	K	-2.09192	-10.4919	SATELLITE TOBACCO MOSAIC VIRUS REFINED AT ROOM TEMPERATURE TO 1.8 A
4nia.pdb	X	J	-2.09192	-10.5098	SATELLITE TOBACCO MOSAIC VIRUS REFINED AT ROOM TEMPERATURE TO 1.8 A
4nia.pdb	X	M	-2.09192	-10.4645	SATELLITE TOBACCO MOSAIC VIRUS REFINED AT ROOM TEMPERATURE TO 1.8 A
4nia.pdb	X	L	-2.09192	-10.4828	SATELLITE TOBACCO MOSAIC VIRUS REFINED AT ROOM TEMPERATURE TO 1.8 A
4nia.pdb	X	O	-2.09192	-10.5008	SATELLITE TOBACCO MOSAIC VIRUS REFINED AT ROOM TEMPERATURE TO 1.8 A
4nia.pdb	X	N	-2.09192	-10.5008	SATELLITE TOBACCO MOSAIC VIRUS REFINED AT ROOM TEMPERATURE TO 1.8 A
4nia.pdb	Z	A	-2.09192	-10.5275	SATELLITE TOBACCO MOSAIC VIRUS REFINED AT ROOM TEMPERATURE TO 1.8 A
4nia.pdb	Z	C	-2.09192	-10.5187	SATELLITE TOBACCO MOSAIC VIRUS REFINED AT ROOM TEMPERATURE TO 1.8 A
4nia.pdb	Z	B	-2.09192	-10.4828	SATELLITE TOBACCO MOSAIC VIRUS REFINED AT ROOM TEMPERATURE TO 1.8 A
4nia.pdb	Z	E	-2.09192	-8.49185	SATELLITE TOBACCO MOSAIC VIRUS REFINED AT ROOM TEMPERATURE TO 1.8 A
4nia.pdb	Z	D	-2.09192	-10.5362	SATELLITE TOBACCO MOSAIC VIRUS REFINED AT ROOM TEMPERATURE TO 1.8 A
4nia.pdb	Z	G	-2.09192	-10.4828	SATELLITE TOBACCO MOSAIC VIRUS REFINED AT ROOM TEMPERATURE TO 1.8 A
4nia.pdb	Z	F	-2.09192	-10.5008	SATELLITE TOBACCO MOSAIC VIRUS REFINED AT ROOM TEMPERATURE TO 1.8 A
4nia.pdb	Z	I	-2.09192	-10.4828	SATELLITE TOBACCO MOSAIC VIRUS REFINED AT ROOM TEMPERATURE TO 1.8 A
4nia.pdb	Z	H	-2.09192	-10.5098	SATELLITE TOBACCO MOSAIC VIRUS REFINED AT ROOM TEMPERATURE TO 1.8 A
4nia.pdb	Z	K	-2.09192	-9.49185	SATELLITE TOBACCO MOSAIC VIRUS REFINED AT ROOM TEMPERATURE TO 1.8 A
4nia.pdb	Z	J	-2.09192	-7.92481	SATELLITE TOBACCO MOSAIC VIRUS REFINED AT ROOM TEMPERATURE TO 1.8 A
4nia.pdb	Z	M	-2.09192	-10.4645	SATELLITE TOBACCO MOSAIC VIRUS REFINED AT ROOM TEMPERATURE TO 1.8 A
4nia.pdb	Z	L	-2.09192	-10.4828	SATELLITE TOBACCO MOSAIC VIRUS REFINED AT ROOM TEMPERATURE TO 1.8 A
4nia.pdb	Z	O	-2.09192	-10.5008	SATELLITE TOBACCO MOSAIC VIRUS REFINED AT ROOM TEMPERATURE TO 1.8 A
4nia.pdb	Z	N	-2.09192	-10.5008	SATELLITE TOBACCO MOSAIC VIRUS REFINED AT ROOM TEMPERATURE TO 1.8 A
4nia.pdb	a	A	-2.09192	-10.5275	SATELLITE TOBACCO MOSAIC VIRUS REFINED AT ROOM TEMPERATURE TO 1.8 A
4nia.pdb	a	C	-2.09192	-10.5187	SATELLITE TOBACCO MOSAIC VIRUS REFINED AT ROOM TEMPERATURE TO 1.8 A
4nia.pdb	a	B	-2.09192	-10.4828	SATELLITE TOBACCO MOSAIC VIRUS REFINED AT ROOM TEMPERATURE TO 1.8 A
4nia.pdb	a	E	-2.09192	-10.4919	SATELLITE TOBACCO MOSAIC VIRUS REFINED AT ROOM TEMPERATURE TO 1.8 A
4nia.pdb	a	D	-2.09192	-10.5362	SATELLITE TOBACCO MOSAIC VIRUS REFINED AT ROOM TEMPERATURE TO 1.8 A
4nia.pdb	a	G	-2.09192	-10.4828	SATELLITE TOBACCO MOSAIC VIRUS REFINED AT ROOM TEMPERATURE TO 1.8 A
4nia.pdb	a	F	-2.09192	-10.5008	SATELLITE TOBACCO MOSAIC VIRUS REFINED AT ROOM TEMPERATURE TO 1.8 A
4nia.pdb	a	I	-2.09192	-8.48281	SATELLITE TOBACCO MOSAIC VIRUS REFINED AT ROOM TEMPERATURE TO 1.8 A
4nia.pdb	a	H	-2.09192	-10.5098	SATELLITE TOBACCO MOSAIC VIRUS REFINED AT ROOM TEMPERATURE TO 1.8 A
4nia.pdb	a	K	-2.09192	-10.4919	SATELLITE TOBACCO MOSAIC VIRUS REFINED AT ROOM TEMPERATURE TO 1.8 A
4nia.pdb	a	J	-2.09192	-10.5098	SATELLITE TOBACCO MOSAIC VIRUS REFINED AT ROOM TEMPERATURE TO 1.8 A
4nia.pdb	a	M	-2.09192	-10.4645	SATELLITE TOBACCO MOSAIC VIRUS REFINED AT ROOM TEMPERATURE TO 1.8 A
4nia.pdb	a	L	-2.09192	-9.48281	SATELLITE TOBACCO MOSAIC VIRUS REFINED AT ROOM TEMPERATURE TO 1.8 A
4nia.pdb	a	O	-2.09192	-10.5008	SATELLITE TOBACCO MOSAIC VIRUS REFINED AT ROOM TEMPERATURE TO 1.8 A
4nia.pdb	a	N	-2.09192	-10.5008	SATELLITE TOBACCO MOSAIC VIRUS REFINED AT ROOM TEMPERATURE TO 1.8 A
4nia.pdb	c	A	-2.09192	-10.5275	SATELLITE TOBACCO MOSAIC VIRUS REFINED AT ROOM TEMPERATURE TO 1.8 A
4nia.pdb	c	C	-2.09192	-10.5187	SATELLITE TOBACCO MOSAIC VIRUS REFINED AT ROOM TEMPERATURE TO 1.8 A
4nia.pdb	c	B	-2.09192	-10.4828	SATELLITE TOBACCO MOSAIC VIRUS REFINED AT ROOM TEMPERATURE TO 1.8 A
4nia.pdb	c	E	-2.09192	-10.4919	SATELLITE TOBACCO MOSAIC VIRUS REFINED AT ROOM TEMPERATURE TO 1.8 A
4nia.pdb	c	D	-2.09192	-10.5362	SATELLITE TOBACCO MOSAIC VIRUS REFINED AT ROOM TEMPERATURE TO 1.8 A
4nia.pdb	c	G	-2.09192	-10.4828	SATELLITE TOBACCO MOSAIC VIRUS REFINED AT ROOM TEMPERATURE TO 1.8 A
4nia.pdb	c	F	-2.09192	-10.5008	SATELLITE TOBACCO MOSAIC VIRUS REFINED AT ROOM TEMPERATURE TO 1.8 A
4nia.pdb	c	I	-2.09192	-10.4828	SATELLITE TOBACCO MOSAIC VIRUS REFINED AT ROOM TEMPERATURE TO 1.8 A
4nia.pdb	c	H	-2.09192	-10.5098	SATELLITE TOBACCO MOSAIC VIRUS REFINED AT ROOM TEMPERATURE TO 1.8 A
4nia.pdb	c	K	-2.09192	-10.4919	SATELLITE TOBACCO MOSAIC VIRUS REFINED AT ROOM TEMPERATURE TO 1.8 A
4nia.pdb	c	J	-2.09192	-10.5098	SATELLITE TOBACCO MOSAIC VIRUS REFINED AT ROOM TEMPERATURE TO 1.8 A
4nia.pdb	c	M	-2.09192	-10.4645	SATELLITE TOBACCO MOSAIC VIRUS REFINED AT ROOM TEMPERATURE TO 1.8 A
4nia.pdb	c	L	-2.09192	-10.4828	SATELLITE TOBACCO MOSAIC VIRUS REFINED AT ROOM TEMPERATURE TO 1.8 A
4nia.pdb	c	O	-2.09192	-10.5008	SATELLITE TOBACCO MOSAIC VIRUS REFINED AT ROOM TEMPERATURE TO 1.8 A
4nia.pdb	c	N	-2.09192	-9.50084	SATELLITE TOBACCO MOSAIC VIRUS REFINED AT ROOM TEMPERATURE TO 1.8 A
4nia.pdb	b	A	-2.09192	-10.5275	SATELLITE TOBACCO MOSAIC VIRUS REFINED AT ROOM TEMPERATURE TO 1.8 A
4nia.pdb	b	C	-2.09192	-10.5187	SATELLITE TOBACCO MOSAIC VIRUS REFINED AT ROOM TEMPERATURE TO 1.8 A
4nia.pdb	b	B	-2.09192	-10.4828	SATELLITE TOBACCO MOSAIC VIRUS REFINED AT ROOM TEMPERATURE TO 1.8 A
4nia.pdb	b	E	-2.09192	-10.4919	SATELLITE TOBACCO MOSAIC VIRUS REFINED AT ROOM TEMPERATURE TO 1.8 A
4nia.pdb	b	D	-2.09192	-10.5362	SATELLITE TOBACCO MOSAIC VIRUS REFINED AT ROOM TEMPERATURE TO 1.8 A
4nia.pdb	b	G	-2.09192	-10.4828	SATELLITE TOBACCO MOSAIC VIRUS REFINED AT ROOM TEMPERATURE TO 1.8 A
4nia.pdb	b	F	-2.09192	-10.5008	SATELLITE TOBACCO MOSAIC VIRUS REFINED AT ROOM TEMPERATURE TO 1.8 A
4nia.pdb	b	I	-2.09192	-10.4828	SATELLITE TOBACCO MOSAIC VIRUS REFINED AT ROOM TEMPERATURE TO 1.8 A
4nia.pdb	b	H	-2.09192	-10.5098	SATELLITE TOBACCO MOSAIC VIRUS REFINED AT ROOM TEMPERATURE TO 1.8 A
4nia.pdb	b	K	-2.09192	-10.4919	SATELLITE TOBACCO MOSAIC VIRUS REFINED AT ROOM TEMPERATURE TO 1.8 A
4nia.pdb	b	J	-2.09192	-10.5098	SATELLITE TOBACCO MOSAIC VIRUS REFINED AT ROOM TEMPERATURE TO 1.8 A
4nia.pdb	b	M	-2.09192	-8.87958	SATELLITE TOBACCO MOSAIC VIRUS REFINED AT ROOM TEMPERATURE TO 1.8 A
4nia.pdb	b	L	-2.09192	-10.4828	SATELLITE TOBACCO MOSAIC VIRUS REFINED AT ROOM TEMPERATURE TO 1.8 A
4nia.pdb	b	O	-2.09192	-10.5008	SATELLITE TOBACCO MOSAIC VIRUS REFINED AT ROOM TEMPERATURE TO 1.8 A
4nia.pdb	b	N	-2.09192	-10.5008	SATELLITE TOBACCO MOSAIC VIRUS REFINED AT ROOM TEMPERATURE TO 1.8 A
4nia.pdb	e	A	-2.09192	-7.94251	SATELLITE TOBACCO MOSAIC VIRUS REFINED AT ROOM TEMPERATURE TO 1.8 A
4nia.pdb	e	C	-2.09192	-10.5187	SATELLITE TOBACCO MOSAIC VIRUS REFINED AT ROOM TEMPERATURE TO 1.8 A
4nia.pdb	e	B	-2.09192	-10.4828	SATELLITE TOBACCO MOSAIC VIRUS REFINED AT ROOM TEMPERATURE TO 1.8 A
4nia.pdb	e	E	-2.09192	-10.4919	SATELLITE TOBACCO MOSAIC VIRUS REFINED AT ROOM TEMPERATURE TO 1.8 A
4nia.pdb	e	D	-2.09192	-10.5362	SATELLITE TOBACCO MOSAIC VIRUS REFINED AT ROOM TEMPERATURE TO 1.8 A
4nia.pdb	e	G	-2.09192	-10.4828	SATELLITE TOBACCO MOSAIC VIRUS REFINED AT ROOM TEMPERATURE TO 1.8 A
4nia.pdb	e	F	-2.09192	-10.5008	SATELLITE TOBACCO MOSAIC VIRUS REFINED AT ROOM TEMPERATURE TO 1.8 A
4nia.pdb	e	I	-2.09192	-10.4828	SATELLITE TOBACCO MOSAIC VIRUS REFINED AT ROOM TEMPERATURE TO 1.8 A
4nia.pdb	e	H	-2.09192	-10.5098	SATELLITE TOBACCO MOSAIC VIRUS REFINED AT ROOM TEMPERATURE TO 1.8 A
4nia.pdb	e	K	-2.09192	-10.4919	SATELLITE TOBACCO MOSAIC VIRUS REFINED AT ROOM TEMPERATURE TO 1.8 A
4nia.pdb	e	J	-2.09192	-10.5098	SATELLITE TOBACCO MOSAIC VIRUS REFINED AT ROOM TEMPERATURE TO 1.8 A
4nia.pdb	e	M	-2.09192	-10.4645	SATELLITE TOBACCO MOSAIC VIRUS REFINED AT ROOM TEMPERATURE TO 1.8 A
4nia.pdb	e	L	-2.09192	-10.4828	SATELLITE TOBACCO MOSAIC VIRUS REFINED AT ROOM TEMPERATURE TO 1.8 A
4nia.pdb	e	O	-2.09192	-9.50084	SATELLITE TOBACCO MOSAIC VIRUS REFINED AT ROOM TEMPERATURE TO 1.8 A
4nia.pdb	e	N	-2.09192	-10.5008	SATELLITE TOBACCO MOSAIC VIRUS REFINED AT ROOM TEMPERATURE TO 1.8 A
4nia.pdb	d	A	-2.09192	-7.94251	SATELLITE TOBACCO MOSAIC VIRUS REFINED AT ROOM TEMPERATURE TO 1.8 A
4nia.pdb	d	C	-2.09192	-10.5187	SATELLITE TOBACCO MOSAIC VIRUS REFINED AT ROOM TEMPERATURE TO 1.8 A
4nia.pdb	d	B	-2.09192	-10.4828	SATELLITE TOBACCO MOSAIC VIRUS REFINED AT ROOM TEMPERATURE TO 1.8 A
4nia.pdb	d	E	-2.09192	-10.4919	SATELLITE TOBACCO MOSAIC VIRUS REFINED AT ROOM TEMPERATURE TO 1.8 A
4nia.pdb	d	D	-2.09192	-10.5362	SATELLITE TOBACCO MOSAIC VIRUS REFINED AT ROOM TEMPERATURE TO 1.8 A
4nia.pdb	d	G	-2.09192	-10.4828	SATELLITE TOBACCO MOSAIC VIRUS REFINED AT ROOM TEMPERATURE TO 1.8 A
4nia.pdb	d	F	-2.09192	-10.5008	SATELLITE TOBACCO MOSAIC VIRUS REFINED AT ROOM TEMPERATURE TO 1.8 A
4nia.pdb	d	I	-2.09192	-10.4828	SATELLITE TOBACCO MOSAIC VIRUS REFINED AT ROOM TEMPERATURE TO 1.8 A
4nia.pdb	d	H	-2.09192	-10.5098	SATELLITE TOBACCO MOSAIC VIRUS REFINED AT ROOM TEMPERATURE TO 1.8 A
4nia.pdb	d	K	-2.09192	-10.4919	SATELLITE TOBACCO MOSAIC VIRUS REFINED AT ROOM TEMPERATURE TO 1.8 A
4nia.pdb	d	J	-2.09192	-10.5098	SATELLITE TOBACCO MOSAIC VIRUS REFINED AT ROOM TEMPERATURE TO 1.8 A
4nia.pdb	d	M	-2.09192	-10.4645	SATELLITE TOBACCO MOSAIC VIRUS REFINED AT ROOM TEMPERATURE TO 1.8 A
4nia.pdb	d	L	-2.09192	-10.4828	SATELLITE TOBACCO MOSAIC VIRUS REFINED AT ROOM TEMPERATURE TO 1.8 A
4nia.pdb	d	O	-2.09192	-8.91588	SATELLITE TOBACCO MOSAIC VIRUS REFINED AT ROOM TEMPERATURE TO 1.8 A
4nia.pdb	d	N	-2.09192	-10.5008	SATELLITE TOBACCO MOSAIC VIRUS REFINED AT ROOM TEMPERATURE TO 1.8 A
4nia.pdb	g	A	-2.09192	-10.5275	SATELLITE TOBACCO MOSAIC VIRUS REFINED AT ROOM TEMPERATURE TO 1.8 A
4nia.pdb	g	C	-2.09192	-7.93369	SATELLITE TOBACCO MOSAIC VIRUS REFINED AT ROOM TEMPERATURE TO 1.8 A
4nia.pdb	g	B	-2.09192	-10.4828	SATELLITE TOBACCO MOSAIC VIRUS REFINED AT ROOM TEMPERATURE TO 1.8 A
4nia.pdb	g	E	-2.09192	-10.4919	SATELLITE TOBACCO MOSAIC VIRUS REFINED AT ROOM TEMPERATURE TO 1.8 A
4nia.pdb	g	D	-2.09192	-10.5362	SATELLITE TOBACCO MOSAIC VIRUS REFINED AT ROOM TEMPERATURE TO 1.8 A
4nia.pdb	g	G	-2.09192	-10.4828	SATELLITE TOBACCO MOSAIC VIRUS REFINED AT ROOM TEMPERATURE TO 1.8 A
4nia.pdb	g	F	-2.09192	-10.5008	SATELLITE TOBACCO MOSAIC VIRUS REFINED AT ROOM TEMPERATURE TO 1.8 A
4nia.pdb	g	I	-2.09192	-10.4828	SATELLITE TOBACCO MOSAIC VIRUS REFINED AT ROOM TEMPERATURE TO 1.8 A
4nia.pdb	g	H	-2.09192	-10.5098	SATELLITE TOBACCO MOSAIC VIRUS REFINED AT ROOM TEMPERATURE TO 1.8 A
4nia.pdb	g	K	-2.09192	-10.4919	SATELLITE TOBACCO MOSAIC VIRUS REFINED AT ROOM TEMPERATURE TO 1.8 A
4nia.pdb	g	J	-2.09192	-10.5098	SATELLITE TOBACCO MOSAIC VIRUS REFINED AT ROOM TEMPERATURE TO 1.8 A
4nia.pdb	g	M	-2.09192	-10.4645	SATELLITE TOBACCO MOSAIC VIRUS REFINED AT ROOM TEMPERATURE TO 1.8 A
4nia.pdb	g	L	-2.09192	-10.4828	SATELLITE TOBACCO MOSAIC VIRUS REFINED AT ROOM TEMPERATURE TO 1.8 A
4nia.pdb	g	O	-2.09192	-10.5008	SATELLITE TOBACCO MOSAIC VIRUS REFINED AT ROOM TEMPERATURE TO 1.8 A
4nia.pdb	g	N	-2.09192	-10.5008	SATELLITE TOBACCO MOSAIC VIRUS REFINED AT ROOM TEMPERATURE TO 1.8 A
4nia.pdb	f	A	-2.09192	-10.5275	SATELLITE TOBACCO MOSAIC VIRUS REFINED AT ROOM TEMPERATURE TO 1.8 A
4nia.pdb	f	C	-2.09192	-10.5187	SATELLITE TOBACCO MOSAIC VIRUS REFINED AT ROOM TEMPERATURE TO 1.8 A
4nia.pdb	f	B	-2.09192	-7.89785	SATELLITE TOBACCO MOSAIC VIRUS REFINED AT ROOM TEMPERATURE TO 1.8 A
4nia.pdb	f	E	-2.09192	-10.4919	SATELLITE TOBACCO MOSAIC VIRUS REFINED AT ROOM TEMPERATURE TO 1.8 A
4nia.pdb	f	D	-2.09192	-10.5362	SATELLITE TOBACCO MOSAIC VIRUS REFINED AT ROOM TEMPERATURE TO 1.8 A
4nia.pdb	f	G	-2.09192	-10.4828	SATELLITE TOBACCO MOSAIC VIRUS REFINED AT ROOM TEMPERATURE TO 1.8 A
4nia.pdb	f	F	-2.09192	-10.5008	SATELLITE TOBACCO MOSAIC VIRUS REFINED AT ROOM TEMPERATURE TO 1.8 A
4nia.pdb	f	I	-2.09192	-10.4828	SATELLITE TOBACCO MOSAIC VIRUS REFINED AT ROOM TEMPERATURE TO 1.8 A
4nia.pdb	f	H	-2.09192	-10.5098	SATELLITE TOBACCO MOSAIC VIRUS REFINED AT ROOM TEMPERATURE TO 1.8 A
4nia.pdb	f	K	-2.09192	-10.4919	SATELLITE TOBACCO MOSAIC VIRUS REFINED AT ROOM TEMPERATURE TO 1.8 A
4nia.pdb	f	J	-2.09192	-10.5098	SATELLITE TOBACCO MOSAIC VIRUS REFINED AT ROOM TEMPERATURE TO 1.8 A
4nia.pdb	f	M	-2.09192	-10.4645	SATELLITE TOBACCO MOSAIC VIRUS REFINED AT ROOM TEMPERATURE TO 1.8 A
4nia.pdb	f	L	-2.09192	-10.4828	SATELLITE TOBACCO MOSAIC VIRUS REFINED AT ROOM TEMPERATURE TO 1.8 A
4nia.pdb	f	O	-2.09192	-10.5008	SATELLITE TOBACCO MOSAIC VIRUS REFINED AT ROOM TEMPERATURE TO 1.8 A
4nia.pdb	f	N	-2.09192	-10.5008	SATELLITE TOBACCO MOSAIC VIRUS REFINED AT ROOM TEMPERATURE TO 1.8 A
4nia.pdb	i	A	-2.09192	-10.5275	SATELLITE TOBACCO MOSAIC VIRUS REFINED AT ROOM TEMPERATURE TO 1.8 A
4nia.pdb	i	C	-2.09192	-10.5187	SATELLITE TOBACCO MOSAIC VIRUS REFINED AT ROOM TEMPERATURE TO 1.8 A
4nia.pdb	i	B	-2.09192	-10.4828	SATELLITE TOBACCO MOSAIC VIRUS REFINED AT ROOM TEMPERATURE TO 1.8 A
4nia.pdb	i	E	-2.09192	-7.90689	SATELLITE TOBACCO MOSAIC VIRUS REFINED AT ROOM TEMPERATURE TO 1.8 A
4nia.pdb	i	D	-2.09192	-10.5362	SATELLITE TOBACCO MOSAIC VIRUS REFINED AT ROOM TEMPERATURE TO 1.8 A
4nia.pdb	i	G	-2.09192	-10.4828	SATELLITE TOBACCO MOSAIC VIRUS REFINED AT ROOM TEMPERATURE TO 1.8 A
4nia.pdb	i	F	-2.09192	-9.50084	SATELLITE TOBACCO MOSAIC VIRUS REFINED AT ROOM TEMPERATURE TO 1.8 A
4nia.pdb	i	I	-2.09192	-10.4828	SATELLITE TOBACCO MOSAIC VIRUS REFINED AT ROOM TEMPERATURE TO 1.8 A
4nia.pdb	i	H	-2.09192	-10.5098	SATELLITE TOBACCO MOSAIC VIRUS REFINED AT ROOM TEMPERATURE TO 1.8 A
4nia.pdb	i	K	-2.09192	-10.4919	SATELLITE TOBACCO MOSAIC VIRUS REFINED AT ROOM TEMPERATURE TO 1.8 A
4nia.pdb	i	J	-2.09192	-10.5098	SATELLITE TOBACCO MOSAIC VIRUS REFINED AT ROOM TEMPERATURE TO 1.8 A
4nia.pdb	i	M	-2.09192	-10.4645	SATELLITE TOBACCO MOSAIC VIRUS REFINED AT ROOM TEMPERATURE TO 1.8 A
4nia.pdb	i	L	-2.09192	-10.4828	SATELLITE TOBACCO MOSAIC VIRUS REFINED AT ROOM TEMPERATURE TO 1.8 A
4nia.pdb	i	O	-2.09192	-8.17891	SATELLITE TOBACCO MOSAIC VIRUS REFINED AT ROOM TEMPERATURE TO 1.8 A
4nia.pdb	i	N	-2.09192	-10.5008	SATELLITE TOBACCO MOSAIC VIRUS REFINED AT ROOM TEMPERATURE TO 1.8 A
4nia.pdb	h	A	-2.09192	-10.5275	SATELLITE TOBACCO MOSAIC VIRUS REFINED AT ROOM TEMPERATURE TO 1.8 A
4nia.pdb	h	C	-2.09192	-10.5187	SATELLITE TOBACCO MOSAIC VIRUS REFINED AT ROOM TEMPERATURE TO 1.8 A
4nia.pdb	h	B	-2.09192	-10.4828	SATELLITE TOBACCO MOSAIC VIRUS REFINED AT ROOM TEMPERATURE TO 1.8 A
4nia.pdb	h	E	-2.09192	-10.4919	SATELLITE TOBACCO MOSAIC VIRUS REFINED AT ROOM TEMPERATURE TO 1.8 A
4nia.pdb	h	D	-2.09192	-7.95128	SATELLITE TOBACCO MOSAIC VIRUS REFINED AT ROOM TEMPERATURE TO 1.8 A
4nia.pdb	h	G	-2.09192	-10.4828	SATELLITE TOBACCO MOSAIC VIRUS REFINED AT ROOM TEMPERATURE TO 1.8 A
4nia.pdb	h	F	-2.09192	-8.17891	SATELLITE TOBACCO MOSAIC VIRUS REFINED AT ROOM TEMPERATURE TO 1.8 A
4nia.pdb	h	I	-2.09192	-10.4828	SATELLITE TOBACCO MOSAIC VIRUS REFINED AT ROOM TEMPERATURE TO 1.8 A
4nia.pdb	h	H	-2.09192	-10.5098	SATELLITE TOBACCO MOSAIC VIRUS REFINED AT ROOM TEMPERATURE TO 1.8 A
4nia.pdb	h	K	-2.09192	-10.4919	SATELLITE TOBACCO MOSAIC VIRUS REFINED AT ROOM TEMPERATURE TO 1.8 A
4nia.pdb	h	J	-2.09192	-10.5098	SATELLITE TOBACCO MOSAIC VIRUS REFINED AT ROOM TEMPERATURE TO 1.8 A
4nia.pdb	h	M	-2.09192	-10.4645	SATELLITE TOBACCO MOSAIC VIRUS REFINED AT ROOM TEMPERATURE TO 1.8 A
4nia.pdb	h	L	-2.09192	-10.4828	SATELLITE TOBACCO MOSAIC VIRUS REFINED AT ROOM TEMPERATURE TO 1.8 A
4nia.pdb	h	O	-2.09192	-10.5008	SATELLITE TOBACCO MOSAIC VIRUS REFINED AT ROOM TEMPERATURE TO 1.8 A
4nia.pdb	h	N	-2.09192	-10.5008	SATELLITE TOBACCO MOSAIC VIRUS REFINED AT ROOM TEMPERATURE TO 1.8 A
4nia.pdb	k	A	-2.09192	-10.5275	SATELLITE TOBACCO MOSAIC VIRUS REFINED AT ROOM TEMPERATURE TO 1.8 A
4nia.pdb	k	C	-2.09192	-10.5187	SATELLITE TOBACCO MOSAIC VIRUS REFINED AT ROOM TEMPERATURE TO 1.8 A
4nia.pdb	k	B	-2.09192	-10.4828	SATELLITE TOBACCO MOSAIC VIRUS REFINED AT ROOM TEMPERATURE TO 1.8 A
4nia.pdb	k	E	-2.09192	-10.4919	SATELLITE TOBACCO MOSAIC VIRUS REFINED AT ROOM TEMPERATURE TO 1.8 A
4nia.pdb	k	D	-2.09192	-10.5362	SATELLITE TOBACCO MOSAIC VIRUS REFINED AT ROOM TEMPERATURE TO 1.8 A
4nia.pdb	k	G	-2.09192	-7.89785	SATELLITE TOBACCO MOSAIC VIRUS REFINED AT ROOM TEMPERATURE TO 1.8 A
4nia.pdb	k	F	-2.09192	-10.5008	SATELLITE TOBACCO MOSAIC VIRUS REFINED AT ROOM TEMPERATURE TO 1.8 A
4nia.pdb	k	I	-2.09192	-10.4828	SATELLITE TOBACCO MOSAIC VIRUS REFINED AT ROOM TEMPERATURE TO 1.8 A
4nia.pdb	k	H	-2.09192	-10.5098	SATELLITE TOBACCO MOSAIC VIRUS REFINED AT ROOM TEMPERATURE TO 1.8 A
4nia.pdb	k	K	-2.09192	-10.4919	SATELLITE TOBACCO MOSAIC VIRUS REFINED AT ROOM TEMPERATURE TO 1.8 A
4nia.pdb	k	J	-2.09192	-10.5098	SATELLITE TOBACCO MOSAIC VIRUS REFINED AT ROOM TEMPERATURE TO 1.8 A
4nia.pdb	k	M	-2.09192	-10.4645	SATELLITE TOBACCO MOSAIC VIRUS REFINED AT ROOM TEMPERATURE TO 1.8 A
4nia.pdb	k	L	-2.09192	-10.4828	SATELLITE TOBACCO MOSAIC VIRUS REFINED AT ROOM TEMPERATURE TO 1.8 A
4nia.pdb	k	O	-2.09192	-10.5008	SATELLITE TOBACCO MOSAIC VIRUS REFINED AT ROOM TEMPERATURE TO 1.8 A
4nia.pdb	k	N	-2.09192	-10.5008	SATELLITE TOBACCO MOSAIC VIRUS REFINED AT ROOM TEMPERATURE TO 1.8 A
4nia.pdb	j	A	-2.09192	-10.5275	SATELLITE TOBACCO MOSAIC VIRUS REFINED AT ROOM TEMPERATURE TO 1.8 A
4nia.pdb	j	C	-2.09192	-10.5187	SATELLITE TOBACCO MOSAIC VIRUS REFINED AT ROOM TEMPERATURE TO 1.8 A
4nia.pdb	j	B	-2.09192	-10.4828	SATELLITE TOBACCO MOSAIC VIRUS REFINED AT ROOM TEMPERATURE TO 1.8 A
4nia.pdb	j	E	-2.09192	-9.49185	SATELLITE TOBACCO MOSAIC VIRUS REFINED AT ROOM TEMPERATURE TO 1.8 A
4nia.pdb	j	D	-2.09192	-10.5362	SATELLITE TOBACCO MOSAIC VIRUS REFINED AT ROOM TEMPERATURE TO 1.8 A
4nia.pdb	j	G	-2.09192	-10.4828	SATELLITE TOBACCO MOSAIC VIRUS REFINED AT ROOM TEMPERATURE TO 1.8 A
4nia.pdb	j	F	-2.09192	-7.91588	SATELLITE TOBACCO MOSAIC VIRUS REFINED AT ROOM TEMPERATURE TO 1.8 A
4nia.pdb	j	I	-2.09192	-10.4828	SATELLITE TOBACCO MOSAIC VIRUS REFINED AT ROOM TEMPERATURE TO 1.8 A
4nia.pdb	j	H	-2.09192	-10.5098	SATELLITE TOBACCO MOSAIC VIRUS REFINED AT ROOM TEMPERATURE TO 1.8 A
4nia.pdb	j	K	-2.09192	-10.4919	SATELLITE TOBACCO MOSAIC VIRUS REFINED AT ROOM TEMPERATURE TO 1.8 A
4nia.pdb	j	J	-2.09192	-10.5098	SATELLITE TOBACCO MOSAIC VIRUS REFINED AT ROOM TEMPERATURE TO 1.8 A
4nia.pdb	j	M	-2.09192	-10.4645	SATELLITE TOBACCO MOSAIC VIRUS REFINED AT ROOM TEMPERATURE TO 1.8 A
4nia.pdb	j	L	-2.09192	-10.4828	SATELLITE TOBACCO MOSAIC VIRUS REFINED AT ROOM TEMPERATURE TO 1.8 A
4nia.pdb	j	O	-2.09192	-10.5008	SATELLITE TOBACCO MOSAIC VIRUS REFINED AT ROOM TEMPERATURE TO 1.8 A
4nia.pdb	j	N	-2.09192	-10.5008	SATELLITE TOBACCO MOSAIC VIRUS REFINED AT ROOM TEMPERATURE TO 1.8 A
4nia.pdb	m	A	-2.09192	-10.5275	SATELLITE TOBACCO MOSAIC VIRUS REFINED AT ROOM TEMPERATURE TO 1.8 A
4nia.pdb	m	C	-2.09192	-10.5187	SATELLITE TOBACCO MOSAIC VIRUS REFINED AT ROOM TEMPERATURE TO 1.8 A
4nia.pdb	m	B	-2.09192	-10.4828	SATELLITE TOBACCO MOSAIC VIRUS REFINED AT ROOM TEMPERATURE TO 1.8 A
4nia.pdb	m	E	-2.09192	-10.4919	SATELLITE TOBACCO MOSAIC VIRUS REFINED AT ROOM TEMPERATURE TO 1.8 A
4nia.pdb	m	D	-2.09192	-10.5362	SATELLITE TOBACCO MOSAIC VIRUS REFINED AT ROOM TEMPERATURE TO 1.8 A
4nia.pdb	m	G	-2.09192	-10.4828	SATELLITE TOBACCO MOSAIC VIRUS REFINED AT ROOM TEMPERATURE TO 1.8 A
4nia.pdb	m	F	-2.09192	-10.5008	SATELLITE TOBACCO MOSAIC VIRUS REFINED AT ROOM TEMPERATURE TO 1.8 A
4nia.pdb	m	I	-2.09192	-7.89785	SATELLITE TOBACCO MOSAIC VIRUS REFINED AT ROOM TEMPERATURE TO 1.8 A
4nia.pdb	m	H	-2.09192	-10.5098	SATELLITE TOBACCO MOSAIC VIRUS REFINED AT ROOM TEMPERATURE TO 1.8 A
4nia.pdb	m	K	-2.09192	-8.16993	SATELLITE TOBACCO MOSAIC VIRUS REFINED AT ROOM TEMPERATURE TO 1.8 A
4nia.pdb	m	J	-2.09192	-10.5098	SATELLITE TOBACCO MOSAIC VIRUS REFINED AT ROOM TEMPERATURE TO 1.8 A
4nia.pdb	m	M	-2.09192	-10.4645	SATELLITE TOBACCO MOSAIC VIRUS REFINED AT ROOM TEMPERATURE TO 1.8 A
4nia.pdb	m	L	-2.09192	-10.4828	SATELLITE TOBACCO MOSAIC VIRUS REFINED AT ROOM TEMPERATURE TO 1.8 A
4nia.pdb	m	O	-2.09192	-10.5008	SATELLITE TOBACCO MOSAIC VIRUS REFINED AT ROOM TEMPERATURE TO 1.8 A
4nia.pdb	m	N	-2.09192	-10.5008	SATELLITE TOBACCO MOSAIC VIRUS REFINED AT ROOM TEMPERATURE TO 1.8 A
4nia.pdb	l	A	-2.09192	-10.5275	SATELLITE TOBACCO MOSAIC VIRUS REFINED AT ROOM TEMPERATURE TO 1.8 A
4nia.pdb	l	C	-2.09192	-10.5187	SATELLITE TOBACCO MOSAIC VIRUS REFINED AT ROOM TEMPERATURE TO 1.8 A
4nia.pdb	l	B	-2.09192	-10.4828	SATELLITE TOBACCO MOSAIC VIRUS REFINED AT ROOM TEMPERATURE TO 1.8 A
4nia.pdb	l	E	-2.09192	-10.4919	SATELLITE TOBACCO MOSAIC VIRUS REFINED AT ROOM TEMPERATURE TO 1.8 A
4nia.pdb	l	D	-2.09192	-10.5362	SATELLITE TOBACCO MOSAIC VIRUS REFINED AT ROOM TEMPERATURE TO 1.8 A
4nia.pdb	l	G	-2.09192	-10.4828	SATELLITE TOBACCO MOSAIC VIRUS REFINED AT ROOM TEMPERATURE TO 1.8 A
4nia.pdb	l	F	-2.09192	-10.5008	SATELLITE TOBACCO MOSAIC VIRUS REFINED AT ROOM TEMPERATURE TO 1.8 A
4nia.pdb	l	I	-2.09192	-10.4828	SATELLITE TOBACCO MOSAIC VIRUS REFINED AT ROOM TEMPERATURE TO 1.8 A
4nia.pdb	l	H	-2.09192	-7.92481	SATELLITE TOBACCO MOSAIC VIRUS REFINED AT ROOM TEMPERATURE TO 1.8 A
4nia.pdb	l	K	-2.09192	-10.4919	SATELLITE TOBACCO MOSAIC VIRUS REFINED AT ROOM TEMPERATURE TO 1.8 A
4nia.pdb	l	J	-2.09192	-10.5098	SATELLITE TOBACCO MOSAIC VIRUS REFINED AT ROOM TEMPERATURE TO 1.8 A
4nia.pdb	l	M	-2.09192	-10.4645	SATELLITE TOBACCO MOSAIC VIRUS REFINED AT ROOM TEMPERATURE TO 1.8 A
4nia.pdb	l	L	-2.09192	-10.4828	SATELLITE TOBACCO MOSAIC VIRUS REFINED AT ROOM TEMPERATURE TO 1.8 A
4nia.pdb	l	O	-2.09192	-10.5008	SATELLITE TOBACCO MOSAIC VIRUS REFINED AT ROOM TEMPERATURE TO 1.8 A
4nia.pdb	l	N	-2.09192	-10.5008	SATELLITE TOBACCO MOSAIC VIRUS REFINED AT ROOM TEMPERATURE TO 1.8 A
4nia.pdb	o	A	-2.09192	-10.5275	SATELLITE TOBACCO MOSAIC VIRUS REFINED AT ROOM TEMPERATURE TO 1.8 A
4nia.pdb	o	C	-2.09192	-10.5187	SATELLITE TOBACCO MOSAIC VIRUS REFINED AT ROOM TEMPERATURE TO 1.8 A
4nia.pdb	o	B	-2.09192	-10.4828	SATELLITE TOBACCO MOSAIC VIRUS REFINED AT ROOM TEMPERATURE TO 1.8 A
4nia.pdb	o	E	-2.09192	-10.4919	SATELLITE TOBACCO MOSAIC VIRUS REFINED AT ROOM TEMPERATURE TO 1.8 A
4nia.pdb	o	D	-2.09192	-10.5362	SATELLITE TOBACCO MOSAIC VIRUS REFINED AT ROOM TEMPERATURE TO 1.8 A
4nia.pdb	o	G	-2.09192	-10.4828	SATELLITE TOBACCO MOSAIC VIRUS REFINED AT ROOM TEMPERATURE TO 1.8 A
4nia.pdb	o	F	-2.09192	-10.5008	SATELLITE TOBACCO MOSAIC VIRUS REFINED AT ROOM TEMPERATURE TO 1.8 A
4nia.pdb	o	I	-2.09192	-10.4828	SATELLITE TOBACCO MOSAIC VIRUS REFINED AT ROOM TEMPERATURE TO 1.8 A
4nia.pdb	o	H	-2.09192	-10.5098	SATELLITE TOBACCO MOSAIC VIRUS REFINED AT ROOM TEMPERATURE TO 1.8 A
4nia.pdb	o	K	-2.09192	-7.90689	SATELLITE TOBACCO MOSAIC VIRUS REFINED AT ROOM TEMPERATURE TO 1.8 A
4nia.pdb	o	J	-2.09192	-9.50978	SATELLITE TOBACCO MOSAIC VIRUS REFINED AT ROOM TEMPERATURE TO 1.8 A
4nia.pdb	o	M	-2.09192	-10.4645	SATELLITE TOBACCO MOSAIC VIRUS REFINED AT ROOM TEMPERATURE TO 1.8 A
4nia.pdb	o	L	-2.09192	-10.4828	SATELLITE TOBACCO MOSAIC VIRUS REFINED AT ROOM TEMPERATURE TO 1.8 A
4nia.pdb	o	O	-2.09192	-10.5008	SATELLITE TOBACCO MOSAIC VIRUS REFINED AT ROOM TEMPERATURE TO 1.8 A
4nia.pdb	o	N	-2.09192	-10.5008	SATELLITE TOBACCO MOSAIC VIRUS REFINED AT ROOM TEMPERATURE TO 1.8 A
4nia.pdb	n	A	-2.09192	-10.5275	SATELLITE TOBACCO MOSAIC VIRUS REFINED AT ROOM TEMPERATURE TO 1.8 A
4nia.pdb	n	C	-2.09192	-10.5187	SATELLITE TOBACCO MOSAIC VIRUS REFINED AT ROOM TEMPERATURE TO 1.8 A
4nia.pdb	n	B	-2.09192	-10.4828	SATELLITE TOBACCO MOSAIC VIRUS REFINED AT ROOM TEMPERATURE TO 1.8 A
4nia.pdb	n	E	-2.09192	-8.16993	SATELLITE TOBACCO MOSAIC VIRUS REFINED AT ROOM TEMPERATURE TO 1.8 A
4nia.pdb	n	D	-2.09192	-10.5362	SATELLITE TOBACCO MOSAIC VIRUS REFINED AT ROOM TEMPERATURE TO 1.8 A
4nia.pdb	n	G	-2.09192	-10.4828	SATELLITE TOBACCO MOSAIC VIRUS REFINED AT ROOM TEMPERATURE TO 1.8 A
4nia.pdb	n	F	-2.09192	-10.5008	SATELLITE TOBACCO MOSAIC VIRUS REFINED AT ROOM TEMPERATURE TO 1.8 A
4nia.pdb	n	I	-2.09192	-10.4828	SATELLITE TOBACCO MOSAIC VIRUS REFINED AT ROOM TEMPERATURE TO 1.8 A
4nia.pdb	n	H	-2.09192	-10.5098	SATELLITE TOBACCO MOSAIC VIRUS REFINED AT ROOM TEMPERATURE TO 1.8 A
4nia.pdb	n	K	-2.09192	-9.49185	SATELLITE TOBACCO MOSAIC VIRUS REFINED AT ROOM TEMPERATURE TO 1.8 A
4nia.pdb	n	J	-2.09192	-7.92481	SATELLITE TOBACCO MOSAIC VIRUS REFINED AT ROOM TEMPERATURE TO 1.8 A
4nia.pdb	n	M	-2.09192	-10.4645	SATELLITE TOBACCO MOSAIC VIRUS REFINED AT ROOM TEMPERATURE TO 1.8 A
4nia.pdb	n	L	-2.09192	-10.4828	SATELLITE TOBACCO MOSAIC VIRUS REFINED AT ROOM TEMPERATURE TO 1.8 A
4nia.pdb	n	O	-2.09192	-10.5008	SATELLITE TOBACCO MOSAIC VIRUS REFINED AT ROOM TEMPERATURE TO 1.8 A
4nia.pdb	n	N	-2.09192	-10.5008	SATELLITE TOBACCO MOSAIC VIRUS REFINED AT ROOM TEMPERATURE TO 1.8 A
4nia.pdb	q	A	-2.09192	-10.5275	SATELLITE TOBACCO MOSAIC VIRUS REFINED AT ROOM TEMPERATURE TO 1.8 A
4nia.pdb	q	C	-2.09192	-10.5187	SATELLITE TOBACCO MOSAIC VIRUS REFINED AT ROOM TEMPERATURE TO 1.8 A
4nia.pdb	q	B	-2.09192	-10.4828	SATELLITE TOBACCO MOSAIC VIRUS REFINED AT ROOM TEMPERATURE TO 1.8 A
4nia.pdb	q	E	-2.09192	-10.4919	SATELLITE TOBACCO MOSAIC VIRUS REFINED AT ROOM TEMPERATURE TO 1.8 A
4nia.pdb	q	D	-2.09192	-10.5362	SATELLITE TOBACCO MOSAIC VIRUS REFINED AT ROOM TEMPERATURE TO 1.8 A
4nia.pdb	q	G	-2.09192	-10.4828	SATELLITE TOBACCO MOSAIC VIRUS REFINED AT ROOM TEMPERATURE TO 1.8 A
4nia.pdb	q	F	-2.09192	-10.5008	SATELLITE TOBACCO MOSAIC VIRUS REFINED AT ROOM TEMPERATURE TO 1.8 A
4nia.pdb	q	I	-2.09192	-10.4828	SATELLITE TOBACCO MOSAIC VIRUS REFINED AT ROOM TEMPERATURE TO 1.8 A
4nia.pdb	q	H	-2.09192	-10.5098	SATELLITE TOBACCO MOSAIC VIRUS REFINED AT ROOM TEMPERATURE TO 1.8 A
4nia.pdb	q	K	-2.09192	-10.4919	SATELLITE TOBACCO MOSAIC VIRUS REFINED AT ROOM TEMPERATURE TO 1.8 A
4nia.pdb	q	J	-2.09192	-10.5098	SATELLITE TOBACCO MOSAIC VIRUS REFINED AT ROOM TEMPERATURE TO 1.8 A
4nia.pdb	q	M	-2.09192	-7.87958	SATELLITE TOBACCO MOSAIC VIRUS REFINED AT ROOM TEMPERATURE TO 1.8 A
4nia.pdb	q	L	-2.09192	-10.4828	SATELLITE TOBACCO MOSAIC VIRUS REFINED AT ROOM TEMPERATURE TO 1.8 A
4nia.pdb	q	O	-2.09192	-10.5008	SATELLITE TOBACCO MOSAIC VIRUS REFINED AT ROOM TEMPERATURE TO 1.8 A
4nia.pdb	q	N	-2.09192	-10.5008	SATELLITE TOBACCO MOSAIC VIRUS REFINED AT ROOM TEMPERATURE TO 1.8 A
4nia.pdb	p	A	-2.09192	-10.5275	SATELLITE TOBACCO MOSAIC VIRUS REFINED AT ROOM TEMPERATURE TO 1.8 A
4nia.pdb	p	C	-2.09192	-10.5187	SATELLITE TOBACCO MOSAIC VIRUS REFINED AT ROOM TEMPERATURE TO 1.8 A
4nia.pdb	p	B	-2.09192	-10.4828	SATELLITE TOBACCO MOSAIC VIRUS REFINED AT ROOM TEMPERATURE TO 1.8 A
4nia.pdb	p	E	-2.09192	-10.4919	SATELLITE TOBACCO MOSAIC VIRUS REFINED AT ROOM TEMPERATURE TO 1.8 A
4nia.pdb	p	D	-2.09192	-10.5362	SATELLITE TOBACCO MOSAIC VIRUS REFINED AT ROOM TEMPERATURE TO 1.8 A
4nia.pdb	p	G	-2.09192	-10.4828	SATELLITE TOBACCO MOSAIC VIRUS REFINED AT ROOM TEMPERATURE TO 1.8 A
4nia.pdb	p	F	-2.09192	-10.5008	SATELLITE TOBACCO MOSAIC VIRUS REFINED AT ROOM TEMPERATURE TO 1.8 A
4nia.pdb	p	I	-2.09192	-10.4828	SATELLITE TOBACCO MOSAIC VIRUS REFINED AT ROOM TEMPERATURE TO 1.8 A
4nia.pdb	p	H	-2.09192	-10.5098	SATELLITE TOBACCO MOSAIC VIRUS REFINED AT ROOM TEMPERATURE TO 1.8 A
4nia.pdb	p	K	-2.09192	-10.4919	SATELLITE TOBACCO MOSAIC VIRUS REFINED AT ROOM TEMPERATURE TO 1.8 A
4nia.pdb	p	J	-2.09192	-10.5098	SATELLITE TOBACCO MOSAIC VIRUS REFINED AT ROOM TEMPERATURE TO 1.8 A
4nia.pdb	p	M	-2.09192	-10.4645	SATELLITE TOBACCO MOSAIC VIRUS REFINED AT ROOM TEMPERATURE TO 1.8 A
4nia.pdb	p	L	-2.09192	-7.89785	SATELLITE TOBACCO MOSAIC VIRUS REFINED AT ROOM TEMPERATURE TO 1.8 A
4nia.pdb	p	O	-2.09192	-10.5008	SATELLITE TOBACCO MOSAIC VIRUS REFINED AT ROOM TEMPERATURE TO 1.8 A
4nia.pdb	p	N	-2.09192	-10.5008	SATELLITE TOBACCO MOSAIC VIRUS REFINED AT ROOM TEMPERATURE TO 1.8 A
4nia.pdb	s	A	-2.09192	-9.52748	SATELLITE TOBACCO MOSAIC VIRUS REFINED AT ROOM TEMPERATURE TO 1.8 A
4nia.pdb	s	C	-2.09192	-10.5187	SATELLITE TOBACCO MOSAIC VIRUS REFINED AT ROOM TEMPERATURE TO 1.8 A
4nia.pdb	s	B	-2.09192	-10.4828	SATELLITE TOBACCO MOSAIC VIRUS REFINED AT ROOM TEMPERATURE TO 1.8 A
4nia.pdb	s	E	-2.09192	-10.4919	SATELLITE TOBACCO MOSAIC VIRUS REFINED AT ROOM TEMPERATURE TO 1.8 A
4nia.pdb	s	D	-2.09192	-10.5362	SATELLITE TOBACCO MOSAIC VIRUS REFINED AT ROOM TEMPERATURE TO 1.8 A
4nia.pdb	s	G	-2.09192	-10.4828	SATELLITE TOBACCO MOSAIC VIRUS REFINED AT ROOM TEMPERATURE TO 1.8 A
4nia.pdb	s	F	-2.09192	-10.5008	SATELLITE TOBACCO MOSAIC VIRUS REFINED AT ROOM TEMPERATURE TO 1.8 A
4nia.pdb	s	I	-2.09192	-10.4828	SATELLITE TOBACCO MOSAIC VIRUS REFINED AT ROOM TEMPERATURE TO 1.8 A
4nia.pdb	s	H	-2.09192	-10.5098	SATELLITE TOBACCO MOSAIC VIRUS REFINED AT ROOM TEMPERATURE TO 1.8 A
4nia.pdb	s	K	-2.09192	-10.4919	SATELLITE TOBACCO MOSAIC VIRUS REFINED AT ROOM TEMPERATURE TO 1.8 A
4nia.pdb	s	J	-2.09192	-8.18785	SATELLITE TOBACCO MOSAIC VIRUS REFINED AT ROOM TEMPERATURE TO 1.8 A
4nia.pdb	s	M	-2.09192	-10.4645	SATELLITE TOBACCO MOSAIC VIRUS REFINED AT ROOM TEMPERATURE TO 1.8 A
4nia.pdb	s	L	-2.09192	-10.4828	SATELLITE TOBACCO MOSAIC VIRUS REFINED AT ROOM TEMPERATURE TO 1.8 A
4nia.pdb	s	O	-2.09192	-7.91588	SATELLITE TOBACCO MOSAIC VIRUS REFINED AT ROOM TEMPERATURE TO 1.8 A
4nia.pdb	s	N	-2.09192	-10.5008	SATELLITE TOBACCO MOSAIC VIRUS REFINED AT ROOM TEMPERATURE TO 1.8 A
4nia.pdb	r	A	-2.09192	-7.94251	SATELLITE TOBACCO MOSAIC VIRUS REFINED AT ROOM TEMPERATURE TO 1.8 A
4nia.pdb	r	C	-2.09192	-10.5187	SATELLITE TOBACCO MOSAIC VIRUS REFINED AT ROOM TEMPERATURE TO 1.8 A
4nia.pdb	r	B	-2.09192	-10.4828	SATELLITE TOBACCO MOSAIC VIRUS REFINED AT ROOM TEMPERATURE TO 1.8 A
4nia.pdb	r	E	-2.09192	-10.4919	SATELLITE TOBACCO MOSAIC VIRUS REFINED AT ROOM TEMPERATURE TO 1.8 A
4nia.pdb	r	D	-2.09192	-10.5362	SATELLITE TOBACCO MOSAIC VIRUS REFINED AT ROOM TEMPERATURE TO 1.8 A
4nia.pdb	r	G	-2.09192	-10.4828	SATELLITE TOBACCO MOSAIC VIRUS REFINED AT ROOM TEMPERATURE TO 1.8 A
4nia.pdb	r	F	-2.09192	-10.5008	SATELLITE TOBACCO MOSAIC VIRUS REFINED AT ROOM TEMPERATURE TO 1.8 A
4nia.pdb	r	I	-2.09192	-10.4828	SATELLITE TOBACCO MOSAIC VIRUS REFINED AT ROOM TEMPERATURE TO 1.8 A
4nia.pdb	r	H	-2.09192	-10.5098	SATELLITE TOBACCO MOSAIC VIRUS REFINED AT ROOM TEMPERATURE TO 1.8 A
4nia.pdb	r	K	-2.09192	-10.4919	SATELLITE TOBACCO MOSAIC VIRUS REFINED AT ROOM TEMPERATURE TO 1.8 A
4nia.pdb	r	J	-2.09192	-10.5098	SATELLITE TOBACCO MOSAIC VIRUS REFINED AT ROOM TEMPERATURE TO 1.8 A
4nia.pdb	r	M	-2.09192	-10.4645	SATELLITE TOBACCO MOSAIC VIRUS REFINED AT ROOM TEMPERATURE TO 1.8 A
4nia.pdb	r	L	-2.09192	-10.4828	SATELLITE TOBACCO MOSAIC VIRUS REFINED AT ROOM TEMPERATURE TO 1.8 A
4nia.pdb	r	O	-2.09192	-10.5008	SATELLITE TOBACCO MOSAIC VIRUS REFINED AT ROOM TEMPERATURE TO 1.8 A
4nia.pdb	r	N	-2.09192	-7.91588	SATELLITE TOBACCO MOSAIC VIRUS REFINED AT ROOM TEMPERATURE TO 1.8 A
4nia.pdb	u	A	1.58496	-7.35755	SATELLITE TOBACCO MOSAIC VIRUS REFINED AT ROOM TEMPERATURE TO 1.8 A
4nia.pdb	u	C	1.58496	-7.34873	SATELLITE TOBACCO MOSAIC VIRUS REFINED AT ROOM TEMPERATURE TO 1.8 A
4nia.pdb	u	B	1.58496	-4.99095	SATELLITE TOBACCO MOSAIC VIRUS REFINED AT ROOM TEMPERATURE TO 1.8 A
4nia.pdb	u	E	1.58496	-7.32193	SATELLITE TOBACCO MOSAIC VIRUS REFINED AT ROOM TEMPERATURE TO 1.8 A
4nia.pdb	u	D	1.58496	-7.36632	SATELLITE TOBACCO MOSAIC VIRUS REFINED AT ROOM TEMPERATURE TO 1.8 A
4nia.pdb	u	G	1.58496	-7.31288	SATELLITE TOBACCO MOSAIC VIRUS REFINED AT ROOM TEMPERATURE TO 1.8 A
4nia.pdb	u	F	1.58496	-7.33092	SATELLITE TOBACCO MOSAIC VIRUS REFINED AT ROOM TEMPERATURE TO 1.8 A
4nia.pdb	u	I	1.58496	-7.31288	SATELLITE TOBACCO MOSAIC VIRUS REFINED AT ROOM TEMPERATURE TO 1.8 A
4nia.pdb	u	H	1.58496	-7.33985	SATELLITE TOBACCO MOSAIC VIRUS REFINED AT ROOM TEMPERATURE TO 1.8 A
4nia.pdb	u	K	1.58496	-7.32193	SATELLITE TOBACCO MOSAIC VIRUS REFINED AT ROOM TEMPERATURE TO 1.8 A
4nia.pdb	u	J	1.58496	-7.33985	SATELLITE TOBACCO MOSAIC VIRUS REFINED AT ROOM TEMPERATURE TO 1.8 A
4nia.pdb	u	M	1.58496	-7.29462	SATELLITE TOBACCO MOSAIC VIRUS REFINED AT ROOM TEMPERATURE TO 1.8 A
4nia.pdb	u	L	1.58496	-7.31288	SATELLITE TOBACCO MOSAIC VIRUS REFINED AT ROOM TEMPERATURE TO 1.8 A
4nia.pdb	u	O	1.58496	-7.33092	SATELLITE TOBACCO MOSAIC VIRUS REFINED AT ROOM TEMPERATURE TO 1.8 A
4nia.pdb	u	N	1.58496	-7.33092	SATELLITE TOBACCO MOSAIC VIRUS REFINED AT ROOM TEMPERATURE TO 1.8 A
4nia.pdb	t	A	1.58496	-5.77259	SATELLITE TOBACCO MOSAIC VIRUS REFINED AT ROOM TEMPERATURE TO 1.8 A
4nia.pdb	t	C	1.58496	-7.34873	SATELLITE TOBACCO MOSAIC VIRUS REFINED AT ROOM TEMPERATURE TO 1.8 A
4nia.pdb	t	B	1.58496	-7.31288	SATELLITE TOBACCO MOSAIC VIRUS REFINED AT ROOM TEMPERATURE TO 1.8 A
4nia.pdb	t	E	1.58496	-7.32193	SATELLITE TOBACCO MOSAIC VIRUS REFINED AT ROOM TEMPERATURE TO 1.8 A
4nia.pdb	t	D	1.58496	-7.36632	SATELLITE TOBACCO MOSAIC VIRUS REFINED AT ROOM TEMPERATURE TO 1.8 A
4nia.pdb	t	G	1.58496	-7.31288	SATELLITE TOBACCO MOSAIC VIRUS REFINED AT ROOM TEMPERATURE TO 1.8 A
4nia.pdb	t	F	1.58496	-7.33092	SATELLITE TOBACCO MOSAIC VIRUS REFINED AT ROOM TEMPERATURE TO 1.8 A
4nia.pdb	t	I	1.58496	-7.31288	SATELLITE TOBACCO MOSAIC VIRUS REFINED AT ROOM TEMPERATURE TO 1.8 A
4nia.pdb	t	H	1.58496	-7.33985	SATELLITE TOBACCO MOSAIC VIRUS REFINED AT ROOM TEMPERATURE TO 1.8 A
4nia.pdb	t	K	1.58496	-7.32193	SATELLITE TOBACCO MOSAIC VIRUS REFINED AT ROOM TEMPERATURE TO 1.8 A
4nia.pdb	t	J	1.58496	-7.33985	SATELLITE TOBACCO MOSAIC VIRUS REFINED AT ROOM TEMPERATURE TO 1.8 A
4nia.pdb	t	M	1.58496	-7.29462	SATELLITE TOBACCO MOSAIC VIRUS REFINED AT ROOM TEMPERATURE TO 1.8 A
4nia.pdb	t	L	1.58496	-7.31288	SATELLITE TOBACCO MOSAIC VIRUS REFINED AT ROOM TEMPERATURE TO 1.8 A
4nia.pdb	t	O	1.58496	-6.33092	SATELLITE TOBACCO MOSAIC VIRUS REFINED AT ROOM TEMPERATURE TO 1.8 A
4nia.pdb	t	N	1.58496	-7.33092	SATELLITE TOBACCO MOSAIC VIRUS REFINED AT ROOM TEMPERATURE TO 1.8 A
4nia.pdb	w	A	1.58496	-7.35755	SATELLITE TOBACCO MOSAIC VIRUS REFINED AT ROOM TEMPERATURE TO 1.8 A
4nia.pdb	w	C	1.58496	-7.34873	SATELLITE TOBACCO MOSAIC VIRUS REFINED AT ROOM TEMPERATURE TO 1.8 A
4nia.pdb	w	B	1.58496	-7.31288	SATELLITE TOBACCO MOSAIC VIRUS REFINED AT ROOM TEMPERATURE TO 1.8 A
4nia.pdb	w	E	1.58496	-7.32193	SATELLITE TOBACCO MOSAIC VIRUS REFINED AT ROOM TEMPERATURE TO 1.8 A
4nia.pdb	w	D	1.58496	-5.36632	SATELLITE TOBACCO MOSAIC VIRUS REFINED AT ROOM TEMPERATURE TO 1.8 A
4nia.pdb	w	G	1.58496	-7.31288	SATELLITE TOBACCO MOSAIC VIRUS REFINED AT ROOM TEMPERATURE TO 1.8 A
4nia.pdb	w	F	1.58496	-7.33092	SATELLITE TOBACCO MOSAIC VIRUS REFINED AT ROOM TEMPERATURE TO 1.8 A
4nia.pdb	w	I	1.58496	-7.31288	SATELLITE TOBACCO MOSAIC VIRUS REFINED AT ROOM TEMPERATURE TO 1.8 A
4nia.pdb	w	H	1.58496	-7.33985	SATELLITE TOBACCO MOSAIC VIRUS REFINED AT ROOM TEMPERATURE TO 1.8 A
4nia.pdb	w	K	1.58496	-7.32193	SATELLITE TOBACCO MOSAIC VIRUS REFINED AT ROOM TEMPERATURE TO 1.8 A
4nia.pdb	w	J	1.58496	-7.33985	SATELLITE TOBACCO MOSAIC VIRUS REFINED AT ROOM TEMPERATURE TO 1.8 A
4nia.pdb	w	M	1.58496	-7.29462	SATELLITE TOBACCO MOSAIC VIRUS REFINED AT ROOM TEMPERATURE TO 1.8 A
4nia.pdb	w	L	1.58496	-7.31288	SATELLITE TOBACCO MOSAIC VIRUS REFINED AT ROOM TEMPERATURE TO 1.8 A
4nia.pdb	w	O	1.58496	-7.33092	SATELLITE TOBACCO MOSAIC VIRUS REFINED AT ROOM TEMPERATURE TO 1.8 A
4nia.pdb	w	N	1.58496	-7.33092	SATELLITE TOBACCO MOSAIC VIRUS REFINED AT ROOM TEMPERATURE TO 1.8 A
4nia.pdb	v	A	1.58496	-7.35755	SATELLITE TOBACCO MOSAIC VIRUS REFINED AT ROOM TEMPERATURE TO 1.8 A
4nia.pdb	v	C	1.58496	-5.0268	SATELLITE TOBACCO MOSAIC VIRUS REFINED AT ROOM TEMPERATURE TO 1.8 A
4nia.pdb	v	B	1.58496	-7.31288	SATELLITE TOBACCO MOSAIC VIRUS REFINED AT ROOM TEMPERATURE TO 1.8 A
4nia.pdb	v	E	1.58496	-7.32193	SATELLITE TOBACCO MOSAIC VIRUS REFINED AT ROOM TEMPERATURE TO 1.8 A
4nia.pdb	v	D	1.58496	-7.36632	SATELLITE TOBACCO MOSAIC VIRUS REFINED AT ROOM TEMPERATURE TO 1.8 A
4nia.pdb	v	G	1.58496	-7.31288	SATELLITE TOBACCO MOSAIC VIRUS REFINED AT ROOM TEMPERATURE TO 1.8 A
4nia.pdb	v	F	1.58496	-7.33092	SATELLITE TOBACCO MOSAIC VIRUS REFINED AT ROOM TEMPERATURE TO 1.8 A
4nia.pdb	v	I	1.58496	-7.31288	SATELLITE TOBACCO MOSAIC VIRUS REFINED AT ROOM TEMPERATURE TO 1.8 A
4nia.pdb	v	H	1.58496	-7.33985	SATELLITE TOBACCO MOSAIC VIRUS REFINED AT ROOM TEMPERATURE TO 1.8 A
4nia.pdb	v	K	1.58496	-7.32193	SATELLITE TOBACCO MOSAIC VIRUS REFINED AT ROOM TEMPERATURE TO 1.8 A
4nia.pdb	v	J	1.58496	-7.33985	SATELLITE TOBACCO MOSAIC VIRUS REFINED AT ROOM TEMPERATURE TO 1.8 A
4nia.pdb	v	M	1.58496	-7.29462	SATELLITE TOBACCO MOSAIC VIRUS REFINED AT ROOM TEMPERATURE TO 1.8 A
4nia.pdb	v	L	1.58496	-7.31288	SATELLITE TOBACCO MOSAIC VIRUS REFINED AT ROOM TEMPERATURE TO 1.8 A
4nia.pdb	v	O	1.58496	-7.33092	SATELLITE TOBACCO MOSAIC VIRUS REFINED AT ROOM TEMPERATURE TO 1.8 A
4nia.pdb	v	N	1.58496	-7.33092	SATELLITE TOBACCO MOSAIC VIRUS REFINED AT ROOM TEMPERATURE TO 1.8 A
4nia.pdb	y	A	1.58496	-7.35755	SATELLITE TOBACCO MOSAIC VIRUS REFINED AT ROOM TEMPERATURE TO 1.8 A
4nia.pdb	y	C	1.58496	-7.34873	SATELLITE TOBACCO MOSAIC VIRUS REFINED AT ROOM TEMPERATURE TO 1.8 A
4nia.pdb	y	B	1.58496	-7.31288	SATELLITE TOBACCO MOSAIC VIRUS REFINED AT ROOM TEMPERATURE TO 1.8 A
4nia.pdb	y	E	1.58496	-6.32193	SATELLITE TOBACCO MOSAIC VIRUS REFINED AT ROOM TEMPERATURE TO 1.8 A
4nia.pdb	y	D	1.58496	-7.36632	SATELLITE TOBACCO MOSAIC VIRUS REFINED AT ROOM TEMPERATURE TO 1.8 A
4nia.pdb	y	G	1.58496	-7.31288	SATELLITE TOBACCO MOSAIC VIRUS REFINED AT ROOM TEMPERATURE TO 1.8 A
4nia.pdb	y	F	1.58496	-5.33092	SATELLITE TOBACCO MOSAIC VIRUS REFINED AT ROOM TEMPERATURE TO 1.8 A
4nia.pdb	y	I	1.58496	-7.31288	SATELLITE TOBACCO MOSAIC VIRUS REFINED AT ROOM TEMPERATURE TO 1.8 A
4nia.pdb	y	H	1.58496	-7.33985	SATELLITE TOBACCO MOSAIC VIRUS REFINED AT ROOM TEMPERATURE TO 1.8 A
4nia.pdb	y	K	1.58496	-7.32193	SATELLITE TOBACCO MOSAIC VIRUS REFINED AT ROOM TEMPERATURE TO 1.8 A
4nia.pdb	y	J	1.58496	-7.33985	SATELLITE TOBACCO MOSAIC VIRUS REFINED AT ROOM TEMPERATURE TO 1.8 A
4nia.pdb	y	M	1.58496	-7.29462	SATELLITE TOBACCO MOSAIC VIRUS REFINED AT ROOM TEMPERATURE TO 1.8 A
4nia.pdb	y	L	1.58496	-7.31288	SATELLITE TOBACCO MOSAIC VIRUS REFINED AT ROOM TEMPERATURE TO 1.8 A
4nia.pdb	y	O	1.58496	-7.33092	SATELLITE TOBACCO MOSAIC VIRUS REFINED AT ROOM TEMPERATURE TO 1.8 A
4nia.pdb	y	N	1.58496	-7.33092	SATELLITE TOBACCO MOSAIC VIRUS REFINED AT ROOM TEMPERATURE TO 1.8 A
4nia.pdb	x	A	1.58496	-7.35755	SATELLITE TOBACCO MOSAIC VIRUS REFINED AT ROOM TEMPERATURE TO 1.8 A
4nia.pdb	x	C	1.58496	-7.34873	SATELLITE TOBACCO MOSAIC VIRUS REFINED AT ROOM TEMPERATURE TO 1.8 A
4nia.pdb	x	B	1.58496	-7.31288	SATELLITE TOBACCO MOSAIC VIRUS REFINED AT ROOM TEMPERATURE TO 1.8 A
4nia.pdb	x	E	1.58496	-5.32193	SATELLITE TOBACCO MOSAIC VIRUS REFINED AT ROOM TEMPERATURE TO 1.8 A
4nia.pdb	x	D	1.58496	-7.36632	SATELLITE TOBACCO MOSAIC VIRUS REFINED AT ROOM TEMPERATURE TO 1.8 A
4nia.pdb	x	G	1.58496	-7.31288	SATELLITE TOBACCO MOSAIC VIRUS REFINED AT ROOM TEMPERATURE TO 1.8 A
4nia.pdb	x	F	1.58496	-6.33092	SATELLITE TOBACCO MOSAIC VIRUS REFINED AT ROOM TEMPERATURE TO 1.8 A
4nia.pdb	x	I	1.58496	-7.31288	SATELLITE TOBACCO MOSAIC VIRUS REFINED AT ROOM TEMPERATURE TO 1.8 A
4nia.pdb	x	H	1.58496	-7.33985	SATELLITE TOBACCO MOSAIC VIRUS REFINED AT ROOM TEMPERATURE TO 1.8 A
4nia.pdb	x	K	1.58496	-7.32193	SATELLITE TOBACCO MOSAIC VIRUS REFINED AT ROOM TEMPERATURE TO 1.8 A
4nia.pdb	x	J	1.58496	-7.33985	SATELLITE TOBACCO MOSAIC VIRUS REFINED AT ROOM TEMPERATURE TO 1.8 A
4nia.pdb	x	M	1.58496	-7.29462	SATELLITE TOBACCO MOSAIC VIRUS REFINED AT ROOM TEMPERATURE TO 1.8 A
4nia.pdb	x	L	1.58496	-7.31288	SATELLITE TOBACCO MOSAIC VIRUS REFINED AT ROOM TEMPERATURE TO 1.8 A
4nia.pdb	x	O	1.58496	-7.33092	SATELLITE TOBACCO MOSAIC VIRUS REFINED AT ROOM TEMPERATURE TO 1.8 A
4nia.pdb	x	N	1.58496	-7.33092	SATELLITE TOBACCO MOSAIC VIRUS REFINED AT ROOM TEMPERATURE TO 1.8 A
4nia.pdb	z	A	1.58496	-7.35755	SATELLITE TOBACCO MOSAIC VIRUS REFINED AT ROOM TEMPERATURE TO 1.8 A
4nia.pdb	z	C	1.58496	-7.34873	SATELLITE TOBACCO MOSAIC VIRUS REFINED AT ROOM TEMPERATURE TO 1.8 A
4nia.pdb	z	B	1.58496	-7.31288	SATELLITE TOBACCO MOSAIC VIRUS REFINED AT ROOM TEMPERATURE TO 1.8 A
4nia.pdb	z	E	1.58496	-7.32193	SATELLITE TOBACCO MOSAIC VIRUS REFINED AT ROOM TEMPERATURE TO 1.8 A
4nia.pdb	z	D	1.58496	-7.36632	SATELLITE TOBACCO MOSAIC VIRUS REFINED AT ROOM TEMPERATURE TO 1.8 A
4nia.pdb	z	G	1.58496	-5.31288	SATELLITE TOBACCO MOSAIC VIRUS REFINED AT ROOM TEMPERATURE TO 1.8 A
4nia.pdb	z	F	1.58496	-7.33092	SATELLITE TOBACCO MOSAIC VIRUS REFINED AT ROOM TEMPERATURE TO 1.8 A
4nia.pdb	z	I	1.58496	-7.31288	SATELLITE TOBACCO MOSAIC VIRUS REFINED AT ROOM TEMPERATURE TO 1.8 A
4nia.pdb	z	H	1.58496	-7.33985	SATELLITE TOBACCO MOSAIC VIRUS REFINED AT ROOM TEMPERATURE TO 1.8 A
4nia.pdb	z	K	1.58496	-7.32193	SATELLITE TOBACCO MOSAIC VIRUS REFINED AT ROOM TEMPERATURE TO 1.8 A
4nia.pdb	z	J	1.58496	-7.33985	SATELLITE TOBACCO MOSAIC VIRUS REFINED AT ROOM TEMPERATURE TO 1.8 A
4nia.pdb	z	M	1.58496	-7.29462	SATELLITE TOBACCO MOSAIC VIRUS REFINED AT ROOM TEMPERATURE TO 1.8 A
4nia.pdb	z	L	1.58496	-7.31288	SATELLITE TOBACCO MOSAIC VIRUS REFINED AT ROOM TEMPERATURE TO 1.8 A
4nia.pdb	z	O	1.58496	-7.33092	SATELLITE TOBACCO MOSAIC VIRUS REFINED AT ROOM TEMPERATURE TO 1.8 A
4nia.pdb	z	N	1.58496	-7.33092	SATELLITE TOBACCO MOSAIC VIRUS REFINED AT ROOM TEMPERATURE TO 1.8 A
4oq8.pdb	C	A	-2.09192	-7.90689	SATELLITE TOBACCO MOSAIC VIRUS REFINED TO 1.4 A RESOLUTION USING
4oq8.pdb	B	A	-2.09192	-9.49185	SATELLITE TOBACCO MOSAIC VIRUS REFINED TO 1.4 A RESOLUTION USING
4oq8.pdb	D	A	1.58496	-5	SATELLITE TOBACCO MOSAIC VIRUS REFINED TO 1.4 A RESOLUTION USING
4oq9.pdb	1	A	1.58496	-7.30378	SATELLITE TOBACCO MOSAIC VIRUS REFINED TO 1.4 A RESOLUTION USING NON-
4oq9.pdb	1	C	1.58496	-7.31288	SATELLITE TOBACCO MOSAIC VIRUS REFINED TO 1.4 A RESOLUTION USING NON-
4oq9.pdb	1	B	1.58496	-7.30378	SATELLITE TOBACCO MOSAIC VIRUS REFINED TO 1.4 A RESOLUTION USING NON-
4oq9.pdb	1	E	1.58496	-7.32193	SATELLITE TOBACCO MOSAIC VIRUS REFINED TO 1.4 A RESOLUTION USING NON-
4oq9.pdb	1	D	1.58496	-7.33092	SATELLITE TOBACCO MOSAIC VIRUS REFINED TO 1.4 A RESOLUTION USING NON-
4oq9.pdb	1	G	1.58496	-7.31288	SATELLITE TOBACCO MOSAIC VIRUS REFINED TO 1.4 A RESOLUTION USING NON-
4oq9.pdb	1	F	1.58496	-7.31288	SATELLITE TOBACCO MOSAIC VIRUS REFINED TO 1.4 A RESOLUTION USING NON-
4oq9.pdb	1	I	1.58496	-7.32193	SATELLITE TOBACCO MOSAIC VIRUS REFINED TO 1.4 A RESOLUTION USING NON-
4oq9.pdb	1	H	1.58496	-5.32193	SATELLITE TOBACCO MOSAIC VIRUS REFINED TO 1.4 A RESOLUTION USING NON-
4oq9.pdb	1	K	1.58496	-7.31288	SATELLITE TOBACCO MOSAIC VIRUS REFINED TO 1.4 A RESOLUTION USING NON-
4oq9.pdb	1	J	1.58496	-7.29462	SATELLITE TOBACCO MOSAIC VIRUS REFINED TO 1.4 A RESOLUTION USING NON-
4oq9.pdb	1	M	1.58496	-7.30378	SATELLITE TOBACCO MOSAIC VIRUS REFINED TO 1.4 A RESOLUTION USING NON-
4oq9.pdb	1	L	1.58496	-7.30378	SATELLITE TOBACCO MOSAIC VIRUS REFINED TO 1.4 A RESOLUTION USING NON-
4oq9.pdb	1	O	1.58496	-7.33092	SATELLITE TOBACCO MOSAIC VIRUS REFINED TO 1.4 A RESOLUTION USING NON-
4oq9.pdb	1	N	1.58496	-7.30378	SATELLITE TOBACCO MOSAIC VIRUS REFINED TO 1.4 A RESOLUTION USING NON-
4oq9.pdb	3	A	1.58496	-7.30378	SATELLITE TOBACCO MOSAIC VIRUS REFINED TO 1.4 A RESOLUTION USING NON-
4oq9.pdb	3	C	1.58496	-7.31288	SATELLITE TOBACCO MOSAIC VIRUS REFINED TO 1.4 A RESOLUTION USING NON-
4oq9.pdb	3	B	1.58496	-7.30378	SATELLITE TOBACCO MOSAIC VIRUS REFINED TO 1.4 A RESOLUTION USING NON-
4oq9.pdb	3	E	1.58496	-7.32193	SATELLITE TOBACCO MOSAIC VIRUS REFINED TO 1.4 A RESOLUTION USING NON-
4oq9.pdb	3	D	1.58496	-7.33092	SATELLITE TOBACCO MOSAIC VIRUS REFINED TO 1.4 A RESOLUTION USING NON-
4oq9.pdb	3	G	1.58496	-7.31288	SATELLITE TOBACCO MOSAIC VIRUS REFINED TO 1.4 A RESOLUTION USING NON-
4oq9.pdb	3	F	1.58496	-7.31288	SATELLITE TOBACCO MOSAIC VIRUS REFINED TO 1.4 A RESOLUTION USING NON-
4oq9.pdb	3	I	1.58496	-7.32193	SATELLITE TOBACCO MOSAIC VIRUS REFINED TO 1.4 A RESOLUTION USING NON-
4oq9.pdb	3	H	1.58496	-7.32193	SATELLITE TOBACCO MOSAIC VIRUS REFINED TO 1.4 A RESOLUTION USING NON-
4oq9.pdb	3	K	1.58496	-6.31288	SATELLITE TOBACCO MOSAIC VIRUS REFINED TO 1.4 A RESOLUTION USING NON-
4oq9.pdb	3	J	1.58496	-5.29462	SATELLITE TOBACCO MOSAIC VIRUS REFINED TO 1.4 A RESOLUTION USING NON-
4oq9.pdb	3	M	1.58496	-7.30378	SATELLITE TOBACCO MOSAIC VIRUS REFINED TO 1.4 A RESOLUTION USING NON-
4oq9.pdb	3	L	1.58496	-7.30378	SATELLITE TOBACCO MOSAIC VIRUS REFINED TO 1.4 A RESOLUTION USING NON-
4oq9.pdb	3	O	1.58496	-7.33092	SATELLITE TOBACCO MOSAIC VIRUS REFINED TO 1.4 A RESOLUTION USING NON-
4oq9.pdb	3	N	1.58496	-7.30378	SATELLITE TOBACCO MOSAIC VIRUS REFINED TO 1.4 A RESOLUTION USING NON-
4oq9.pdb	2	A	1.58496	-7.30378	SATELLITE TOBACCO MOSAIC VIRUS REFINED TO 1.4 A RESOLUTION USING NON-
4oq9.pdb	2	C	1.58496	-7.31288	SATELLITE TOBACCO MOSAIC VIRUS REFINED TO 1.4 A RESOLUTION USING NON-
4oq9.pdb	2	B	1.58496	-7.30378	SATELLITE TOBACCO MOSAIC VIRUS REFINED TO 1.4 A RESOLUTION USING NON-
4oq9.pdb	2	E	1.58496	-7.32193	SATELLITE TOBACCO MOSAIC VIRUS REFINED TO 1.4 A RESOLUTION USING NON-
4oq9.pdb	2	D	1.58496	-7.33092	SATELLITE TOBACCO MOSAIC VIRUS REFINED TO 1.4 A RESOLUTION USING NON-
4oq9.pdb	2	G	1.58496	-7.31288	SATELLITE TOBACCO MOSAIC VIRUS REFINED TO 1.4 A RESOLUTION USING NON-
4oq9.pdb	2	F	1.58496	-7.31288	SATELLITE TOBACCO MOSAIC VIRUS REFINED TO 1.4 A RESOLUTION USING NON-
4oq9.pdb	2	I	1.58496	-5	SATELLITE TOBACCO MOSAIC VIRUS REFINED TO 1.4 A RESOLUTION USING NON-
4oq9.pdb	2	H	1.58496	-7.32193	SATELLITE TOBACCO MOSAIC VIRUS REFINED TO 1.4 A RESOLUTION USING NON-
4oq9.pdb	2	K	1.58496	-7.31288	SATELLITE TOBACCO MOSAIC VIRUS REFINED TO 1.4 A RESOLUTION USING NON-
4oq9.pdb	2	J	1.58496	-7.29462	SATELLITE TOBACCO MOSAIC VIRUS REFINED TO 1.4 A RESOLUTION USING NON-
4oq9.pdb	2	M	1.58496	-7.30378	SATELLITE TOBACCO MOSAIC VIRUS REFINED TO 1.4 A RESOLUTION USING NON-
4oq9.pdb	2	L	1.58496	-7.30378	SATELLITE TOBACCO MOSAIC VIRUS REFINED TO 1.4 A RESOLUTION USING NON-
4oq9.pdb	2	O	1.58496	-7.33092	SATELLITE TOBACCO MOSAIC VIRUS REFINED TO 1.4 A RESOLUTION USING NON-
4oq9.pdb	2	N	1.58496	-7.30378	SATELLITE TOBACCO MOSAIC VIRUS REFINED TO 1.4 A RESOLUTION USING NON-
4oq9.pdb	5	A	1.58496	-7.30378	SATELLITE TOBACCO MOSAIC VIRUS REFINED TO 1.4 A RESOLUTION USING NON-
4oq9.pdb	5	C	1.58496	-7.31288	SATELLITE TOBACCO MOSAIC VIRUS REFINED TO 1.4 A RESOLUTION USING NON-
4oq9.pdb	5	B	1.58496	-7.30378	SATELLITE TOBACCO MOSAIC VIRUS REFINED TO 1.4 A RESOLUTION USING NON-
4oq9.pdb	5	E	1.58496	-7.32193	SATELLITE TOBACCO MOSAIC VIRUS REFINED TO 1.4 A RESOLUTION USING NON-
4oq9.pdb	5	D	1.58496	-7.33092	SATELLITE TOBACCO MOSAIC VIRUS REFINED TO 1.4 A RESOLUTION USING NON-
4oq9.pdb	5	G	1.58496	-7.31288	SATELLITE TOBACCO MOSAIC VIRUS REFINED TO 1.4 A RESOLUTION USING NON-
4oq9.pdb	5	F	1.58496	-7.31288	SATELLITE TOBACCO MOSAIC VIRUS REFINED TO 1.4 A RESOLUTION USING NON-
4oq9.pdb	5	I	1.58496	-7.32193	SATELLITE TOBACCO MOSAIC VIRUS REFINED TO 1.4 A RESOLUTION USING NON-
4oq9.pdb	5	H	1.58496	-7.32193	SATELLITE TOBACCO MOSAIC VIRUS REFINED TO 1.4 A RESOLUTION USING NON-
4oq9.pdb	5	K	1.58496	-7.31288	SATELLITE TOBACCO MOSAIC VIRUS REFINED TO 1.4 A RESOLUTION USING NON-
4oq9.pdb	5	J	1.58496	-7.29462	SATELLITE TOBACCO MOSAIC VIRUS REFINED TO 1.4 A RESOLUTION USING NON-
4oq9.pdb	5	M	1.58496	-7.30378	SATELLITE TOBACCO MOSAIC VIRUS REFINED TO 1.4 A RESOLUTION USING NON-
4oq9.pdb	5	L	1.58496	-4.98185	SATELLITE TOBACCO MOSAIC VIRUS REFINED TO 1.4 A RESOLUTION USING NON-
4oq9.pdb	5	O	1.58496	-7.33092	SATELLITE TOBACCO MOSAIC VIRUS REFINED TO 1.4 A RESOLUTION USING NON-
4oq9.pdb	5	N	1.58496	-7.30378	SATELLITE TOBACCO MOSAIC VIRUS REFINED TO 1.4 A RESOLUTION USING NON-
4oq9.pdb	4	A	1.58496	-7.30378	SATELLITE TOBACCO MOSAIC VIRUS REFINED TO 1.4 A RESOLUTION USING NON-
4oq9.pdb	4	C	1.58496	-7.31288	SATELLITE TOBACCO MOSAIC VIRUS REFINED TO 1.4 A RESOLUTION USING NON-
4oq9.pdb	4	B	1.58496	-7.30378	SATELLITE TOBACCO MOSAIC VIRUS REFINED TO 1.4 A RESOLUTION USING NON-
4oq9.pdb	4	E	1.58496	-7.32193	SATELLITE TOBACCO MOSAIC VIRUS REFINED TO 1.4 A RESOLUTION USING NON-
4oq9.pdb	4	D	1.58496	-7.33092	SATELLITE TOBACCO MOSAIC VIRUS REFINED TO 1.4 A RESOLUTION USING NON-
4oq9.pdb	4	G	1.58496	-7.31288	SATELLITE TOBACCO MOSAIC VIRUS REFINED TO 1.4 A RESOLUTION USING NON-
4oq9.pdb	4	F	1.58496	-7.31288	SATELLITE TOBACCO MOSAIC VIRUS REFINED TO 1.4 A RESOLUTION USING NON-
4oq9.pdb	4	I	1.58496	-7.32193	SATELLITE TOBACCO MOSAIC VIRUS REFINED TO 1.4 A RESOLUTION USING NON-
4oq9.pdb	4	H	1.58496	-7.32193	SATELLITE TOBACCO MOSAIC VIRUS REFINED TO 1.4 A RESOLUTION USING NON-
4oq9.pdb	4	K	1.58496	-4.99095	SATELLITE TOBACCO MOSAIC VIRUS REFINED TO 1.4 A RESOLUTION USING NON-
4oq9.pdb	4	J	1.58496	-6.29462	SATELLITE TOBACCO MOSAIC VIRUS REFINED TO 1.4 A RESOLUTION USING NON-
4oq9.pdb	4	M	1.58496	-7.30378	SATELLITE TOBACCO MOSAIC VIRUS REFINED TO 1.4 A RESOLUTION USING NON-
4oq9.pdb	4	L	1.58496	-7.30378	SATELLITE TOBACCO MOSAIC VIRUS REFINED TO 1.4 A RESOLUTION USING NON-
4oq9.pdb	4	O	1.58496	-7.33092	SATELLITE TOBACCO MOSAIC VIRUS REFINED TO 1.4 A RESOLUTION USING NON-
4oq9.pdb	4	N	1.58496	-7.30378	SATELLITE TOBACCO MOSAIC VIRUS REFINED TO 1.4 A RESOLUTION USING NON-
4oq9.pdb	7	A	1.58496	-7.30378	SATELLITE TOBACCO MOSAIC VIRUS REFINED TO 1.4 A RESOLUTION USING NON-
4oq9.pdb	7	C	1.58496	-7.31288	SATELLITE TOBACCO MOSAIC VIRUS REFINED TO 1.4 A RESOLUTION USING NON-
4oq9.pdb	7	B	1.58496	-7.30378	SATELLITE TOBACCO MOSAIC VIRUS REFINED TO 1.4 A RESOLUTION USING NON-
4oq9.pdb	7	E	1.58496	-7.32193	SATELLITE TOBACCO MOSAIC VIRUS REFINED TO 1.4 A RESOLUTION USING NON-
4oq9.pdb	7	D	1.58496	-7.33092	SATELLITE TOBACCO MOSAIC VIRUS REFINED TO 1.4 A RESOLUTION USING NON-
4oq9.pdb	7	G	1.58496	-7.31288	SATELLITE TOBACCO MOSAIC VIRUS REFINED TO 1.4 A RESOLUTION USING NON-
4oq9.pdb	7	F	1.58496	-7.31288	SATELLITE TOBACCO MOSAIC VIRUS REFINED TO 1.4 A RESOLUTION USING NON-
4oq9.pdb	7	I	1.58496	-7.32193	SATELLITE TOBACCO MOSAIC VIRUS REFINED TO 1.4 A RESOLUTION USING NON-
4oq9.pdb	7	H	1.58496	-7.32193	SATELLITE TOBACCO MOSAIC VIRUS REFINED TO 1.4 A RESOLUTION USING NON-
4oq9.pdb	7	K	1.58496	-7.31288	SATELLITE TOBACCO MOSAIC VIRUS REFINED TO 1.4 A RESOLUTION USING NON-
4oq9.pdb	7	J	1.58496	-7.29462	SATELLITE TOBACCO MOSAIC VIRUS REFINED TO 1.4 A RESOLUTION USING NON-
4oq9.pdb	7	M	1.58496	-7.30378	SATELLITE TOBACCO MOSAIC VIRUS REFINED TO 1.4 A RESOLUTION USING NON-
4oq9.pdb	7	L	1.58496	-7.30378	SATELLITE TOBACCO MOSAIC VIRUS REFINED TO 1.4 A RESOLUTION USING NON-
4oq9.pdb	7	O	1.58496	-7.33092	SATELLITE TOBACCO MOSAIC VIRUS REFINED TO 1.4 A RESOLUTION USING NON-
4oq9.pdb	7	N	1.58496	-4.98185	SATELLITE TOBACCO MOSAIC VIRUS REFINED TO 1.4 A RESOLUTION USING NON-
4oq9.pdb	6	A	1.58496	-7.30378	SATELLITE TOBACCO MOSAIC VIRUS REFINED TO 1.4 A RESOLUTION USING NON-
4oq9.pdb	6	C	1.58496	-7.31288	SATELLITE TOBACCO MOSAIC VIRUS REFINED TO 1.4 A RESOLUTION USING NON-
4oq9.pdb	6	B	1.58496	-7.30378	SATELLITE TOBACCO MOSAIC VIRUS REFINED TO 1.4 A RESOLUTION USING NON-
4oq9.pdb	6	E	1.58496	-7.32193	SATELLITE TOBACCO MOSAIC VIRUS REFINED TO 1.4 A RESOLUTION USING NON-
4oq9.pdb	6	D	1.58496	-7.33092	SATELLITE TOBACCO MOSAIC VIRUS REFINED TO 1.4 A RESOLUTION USING NON-
4oq9.pdb	6	G	1.58496	-7.31288	SATELLITE TOBACCO MOSAIC VIRUS REFINED TO 1.4 A RESOLUTION USING NON-
4oq9.pdb	6	F	1.58496	-7.31288	SATELLITE TOBACCO MOSAIC VIRUS REFINED TO 1.4 A RESOLUTION USING NON-
4oq9.pdb	6	I	1.58496	-7.32193	SATELLITE TOBACCO MOSAIC VIRUS REFINED TO 1.4 A RESOLUTION USING NON-
4oq9.pdb	6	H	1.58496	-7.32193	SATELLITE TOBACCO MOSAIC VIRUS REFINED TO 1.4 A RESOLUTION USING NON-
4oq9.pdb	6	K	1.58496	-7.31288	SATELLITE TOBACCO MOSAIC VIRUS REFINED TO 1.4 A RESOLUTION USING NON-
4oq9.pdb	6	J	1.58496	-7.29462	SATELLITE TOBACCO MOSAIC VIRUS REFINED TO 1.4 A RESOLUTION USING NON-
4oq9.pdb	6	M	1.58496	-5.30378	SATELLITE TOBACCO MOSAIC VIRUS REFINED TO 1.4 A RESOLUTION USING NON-
4oq9.pdb	6	L	1.58496	-7.30378	SATELLITE TOBACCO MOSAIC VIRUS REFINED TO 1.4 A RESOLUTION USING NON-
4oq9.pdb	6	O	1.58496	-7.33092	SATELLITE TOBACCO MOSAIC VIRUS REFINED TO 1.4 A RESOLUTION USING NON-
4oq9.pdb	6	N	1.58496	-7.30378	SATELLITE TOBACCO MOSAIC VIRUS REFINED TO 1.4 A RESOLUTION USING NON-
4oq9.pdb	8	A	1.58496	-5.71882	SATELLITE TOBACCO MOSAIC VIRUS REFINED TO 1.4 A RESOLUTION USING NON-
4oq9.pdb	8	C	1.58496	-7.31288	SATELLITE TOBACCO MOSAIC VIRUS REFINED TO 1.4 A RESOLUTION USING NON-
4oq9.pdb	8	B	1.58496	-7.30378	SATELLITE TOBACCO MOSAIC VIRUS REFINED TO 1.4 A RESOLUTION USING NON-
4oq9.pdb	8	E	1.58496	-7.32193	SATELLITE TOBACCO MOSAIC VIRUS REFINED TO 1.4 A RESOLUTION USING NON-
4oq9.pdb	8	D	1.58496	-7.33092	SATELLITE TOBACCO MOSAIC VIRUS REFINED TO 1.4 A RESOLUTION USING NON-
4oq9.pdb	8	G	1.58496	-7.31288	SATELLITE TOBACCO MOSAIC VIRUS REFINED TO 1.4 A RESOLUTION USING NON-
4oq9.pdb	8	F	1.58496	-7.31288	SATELLITE TOBACCO MOSAIC VIRUS REFINED TO 1.4 A RESOLUTION USING NON-
4oq9.pdb	8	I	1.58496	-7.32193	SATELLITE TOBACCO MOSAIC VIRUS REFINED TO 1.4 A RESOLUTION USING NON-
4oq9.pdb	8	H	1.58496	-7.32193	SATELLITE TOBACCO MOSAIC VIRUS REFINED TO 1.4 A RESOLUTION USING NON-
4oq9.pdb	8	K	1.58496	-7.31288	SATELLITE TOBACCO MOSAIC VIRUS REFINED TO 1.4 A RESOLUTION USING NON-
4oq9.pdb	8	J	1.58496	-7.29462	SATELLITE TOBACCO MOSAIC VIRUS REFINED TO 1.4 A RESOLUTION USING NON-
4oq9.pdb	8	M	1.58496	-7.30378	SATELLITE TOBACCO MOSAIC VIRUS REFINED TO 1.4 A RESOLUTION USING NON-
4oq9.pdb	8	L	1.58496	-7.30378	SATELLITE TOBACCO MOSAIC VIRUS REFINED TO 1.4 A RESOLUTION USING NON-
4oq9.pdb	8	O	1.58496	-5.00899	SATELLITE TOBACCO MOSAIC VIRUS REFINED TO 1.4 A RESOLUTION USING NON-
4oq9.pdb	8	N	1.58496	-7.30378	SATELLITE TOBACCO MOSAIC VIRUS REFINED TO 1.4 A RESOLUTION USING NON-
4oq9.pdb	Q	A	-2.09192	-10.4737	SATELLITE TOBACCO MOSAIC VIRUS REFINED TO 1.4 A RESOLUTION USING NON-
4oq9.pdb	Q	C	-2.09192	-10.4828	SATELLITE TOBACCO MOSAIC VIRUS REFINED TO 1.4 A RESOLUTION USING NON-
4oq9.pdb	Q	B	-2.09192	-9.47371	SATELLITE TOBACCO MOSAIC VIRUS REFINED TO 1.4 A RESOLUTION USING NON-
4oq9.pdb	Q	E	-2.09192	-10.4919	SATELLITE TOBACCO MOSAIC VIRUS REFINED TO 1.4 A RESOLUTION USING NON-
4oq9.pdb	Q	D	-2.09192	-10.5008	SATELLITE TOBACCO MOSAIC VIRUS REFINED TO 1.4 A RESOLUTION USING NON-
4oq9.pdb	Q	G	-2.09192	-10.4828	SATELLITE TOBACCO MOSAIC VIRUS REFINED TO 1.4 A RESOLUTION USING NON-
4oq9.pdb	Q	F	-2.09192	-10.4828	SATELLITE TOBACCO MOSAIC VIRUS REFINED TO 1.4 A RESOLUTION USING NON-
4oq9.pdb	Q	I	-2.09192	-10.4919	SATELLITE TOBACCO MOSAIC VIRUS REFINED TO 1.4 A RESOLUTION USING NON-
4oq9.pdb	Q	H	-2.09192	-10.4919	SATELLITE TOBACCO MOSAIC VIRUS REFINED TO 1.4 A RESOLUTION USING NON-
4oq9.pdb	Q	K	-2.09192	-10.4828	SATELLITE TOBACCO MOSAIC VIRUS REFINED TO 1.4 A RESOLUTION USING NON-
4oq9.pdb	Q	J	-2.09192	-10.4645	SATELLITE TOBACCO MOSAIC VIRUS REFINED TO 1.4 A RESOLUTION USING NON-
4oq9.pdb	Q	M	-2.09192	-10.4737	SATELLITE TOBACCO MOSAIC VIRUS REFINED TO 1.4 A RESOLUTION USING NON-
4oq9.pdb	Q	L	-2.09192	-10.4737	SATELLITE TOBACCO MOSAIC VIRUS REFINED TO 1.4 A RESOLUTION USING NON-
4oq9.pdb	Q	O	-2.09192	-10.5008	SATELLITE TOBACCO MOSAIC VIRUS REFINED TO 1.4 A RESOLUTION USING NON-
4oq9.pdb	Q	N	-2.09192	-7.88874	SATELLITE TOBACCO MOSAIC VIRUS REFINED TO 1.4 A RESOLUTION USING NON-
4oq9.pdb	P	A	-2.09192	-9.47371	SATELLITE TOBACCO MOSAIC VIRUS REFINED TO 1.4 A RESOLUTION USING NON-
4oq9.pdb	P	C	-2.09192	-10.4828	SATELLITE TOBACCO MOSAIC VIRUS REFINED TO 1.4 A RESOLUTION USING NON-
4oq9.pdb	P	B	-2.09192	-10.4737	SATELLITE TOBACCO MOSAIC VIRUS REFINED TO 1.4 A RESOLUTION USING NON-
4oq9.pdb	P	E	-2.09192	-10.4919	SATELLITE TOBACCO MOSAIC VIRUS REFINED TO 1.4 A RESOLUTION USING NON-
4oq9.pdb	P	D	-2.09192	-10.5008	SATELLITE TOBACCO MOSAIC VIRUS REFINED TO 1.4 A RESOLUTION USING NON-
4oq9.pdb	P	G	-2.09192	-10.4828	SATELLITE TOBACCO MOSAIC VIRUS REFINED TO 1.4 A RESOLUTION USING NON-
4oq9.pdb	P	F	-2.09192	-10.4828	SATELLITE TOBACCO MOSAIC VIRUS REFINED TO 1.4 A RESOLUTION USING NON-
4oq9.pdb	P	I	-2.09192	-10.4919	SATELLITE TOBACCO MOSAIC VIRUS REFINED TO 1.4 A RESOLUTION USING NON-
4oq9.pdb	P	H	-2.09192	-10.4919	SATELLITE TOBACCO MOSAIC VIRUS REFINED TO 1.4 A RESOLUTION USING NON-
4oq9.pdb	P	K	-2.09192	-10.4828	SATELLITE TOBACCO MOSAIC VIRUS REFINED TO 1.4 A RESOLUTION USING NON-
4oq9.pdb	P	J	-2.09192	-8.14262	SATELLITE TOBACCO MOSAIC VIRUS REFINED TO 1.4 A RESOLUTION USING NON-
4oq9.pdb	P	M	-2.09192	-10.4737	SATELLITE TOBACCO MOSAIC VIRUS REFINED TO 1.4 A RESOLUTION USING NON-
4oq9.pdb	P	L	-2.09192	-10.4737	SATELLITE TOBACCO MOSAIC VIRUS REFINED TO 1.4 A RESOLUTION USING NON-
4oq9.pdb	P	O	-2.09192	-7.91588	SATELLITE TOBACCO MOSAIC VIRUS REFINED TO 1.4 A RESOLUTION USING NON-
4oq9.pdb	P	N	-2.09192	-10.4737	SATELLITE TOBACCO MOSAIC VIRUS REFINED TO 1.4 A RESOLUTION USING NON-
4oq9.pdb	S	A	-2.09192	-10.4737	SATELLITE TOBACCO MOSAIC VIRUS REFINED TO 1.4 A RESOLUTION USING NON-
4oq9.pdb	S	C	-2.09192	-10.4828	SATELLITE TOBACCO MOSAIC VIRUS REFINED TO 1.4 A RESOLUTION USING NON-
4oq9.pdb	S	B	-2.09192	-10.4737	SATELLITE TOBACCO MOSAIC VIRUS REFINED TO 1.4 A RESOLUTION USING NON-
4oq9.pdb	S	E	-2.09192	-10.4919	SATELLITE TOBACCO MOSAIC VIRUS REFINED TO 1.4 A RESOLUTION USING NON-
4oq9.pdb	S	D	-2.09192	-8.91588	SATELLITE TOBACCO MOSAIC VIRUS REFINED TO 1.4 A RESOLUTION USING NON-
4oq9.pdb	S	G	-2.09192	-10.4828	SATELLITE TOBACCO MOSAIC VIRUS REFINED TO 1.4 A RESOLUTION USING NON-
4oq9.pdb	S	F	-2.09192	-10.4828	SATELLITE TOBACCO MOSAIC VIRUS REFINED TO 1.4 A RESOLUTION USING NON-
4oq9.pdb	S	I	-2.09192	-10.4919	SATELLITE TOBACCO MOSAIC VIRUS REFINED TO 1.4 A RESOLUTION USING NON-
4oq9.pdb	S	H	-2.09192	-10.4919	SATELLITE TOBACCO MOSAIC VIRUS REFINED TO 1.4 A RESOLUTION USING NON-
4oq9.pdb	S	K	-2.09192	-10.4828	SATELLITE TOBACCO MOSAIC VIRUS REFINED TO 1.4 A RESOLUTION USING NON-
4oq9.pdb	S	J	-2.09192	-10.4645	SATELLITE TOBACCO MOSAIC VIRUS REFINED TO 1.4 A RESOLUTION USING NON-
4oq9.pdb	S	M	-2.09192	-10.4737	SATELLITE TOBACCO MOSAIC VIRUS REFINED TO 1.4 A RESOLUTION USING NON-
4oq9.pdb	S	L	-2.09192	-10.4737	SATELLITE TOBACCO MOSAIC VIRUS REFINED TO 1.4 A RESOLUTION USING NON-
4oq9.pdb	S	O	-2.09192	-10.5008	SATELLITE TOBACCO MOSAIC VIRUS REFINED TO 1.4 A RESOLUTION USING NON-
4oq9.pdb	S	N	-2.09192	-10.4737	SATELLITE TOBACCO MOSAIC VIRUS REFINED TO 1.4 A RESOLUTION USING NON-
4oq9.pdb	R	A	-2.09192	-10.4737	SATELLITE TOBACCO MOSAIC VIRUS REFINED TO 1.4 A RESOLUTION USING NON-
4oq9.pdb	R	C	-2.09192	-9.48281	SATELLITE TOBACCO MOSAIC VIRUS REFINED TO 1.4 A RESOLUTION USING NON-
4oq9.pdb	R	B	-2.09192	-10.4737	SATELLITE TOBACCO MOSAIC VIRUS REFINED TO 1.4 A RESOLUTION USING NON-
4oq9.pdb	R	E	-2.09192	-10.4919	SATELLITE TOBACCO MOSAIC VIRUS REFINED TO 1.4 A RESOLUTION USING NON-
4oq9.pdb	R	D	-2.09192	-10.5008	SATELLITE TOBACCO MOSAIC VIRUS REFINED TO 1.4 A RESOLUTION USING NON-
4oq9.pdb	R	G	-2.09192	-10.4828	SATELLITE TOBACCO MOSAIC VIRUS REFINED TO 1.4 A RESOLUTION USING NON-
4oq9.pdb	R	F	-2.09192	-10.4828	SATELLITE TOBACCO MOSAIC VIRUS REFINED TO 1.4 A RESOLUTION USING NON-
4oq9.pdb	R	I	-2.09192	-10.4919	SATELLITE TOBACCO MOSAIC VIRUS REFINED TO 1.4 A RESOLUTION USING NON-
4oq9.pdb	R	H	-2.09192	-10.4919	SATELLITE TOBACCO MOSAIC VIRUS REFINED TO 1.4 A RESOLUTION USING NON-
4oq9.pdb	R	K	-2.09192	-10.4828	SATELLITE TOBACCO MOSAIC VIRUS REFINED TO 1.4 A RESOLUTION USING NON-
4oq9.pdb	R	J	-2.09192	-10.4645	SATELLITE TOBACCO MOSAIC VIRUS REFINED TO 1.4 A RESOLUTION USING NON-
4oq9.pdb	R	M	-2.09192	-10.4737	SATELLITE TOBACCO MOSAIC VIRUS REFINED TO 1.4 A RESOLUTION USING NON-
4oq9.pdb	R	L	-2.09192	-10.4737	SATELLITE TOBACCO MOSAIC VIRUS REFINED TO 1.4 A RESOLUTION USING NON-
4oq9.pdb	R	O	-2.09192	-10.5008	SATELLITE TOBACCO MOSAIC VIRUS REFINED TO 1.4 A RESOLUTION USING NON-
4oq9.pdb	R	N	-2.09192	-10.4737	SATELLITE TOBACCO MOSAIC VIRUS REFINED TO 1.4 A RESOLUTION USING NON-
4oq9.pdb	U	A	-2.09192	-10.4737	SATELLITE TOBACCO MOSAIC VIRUS REFINED TO 1.4 A RESOLUTION USING NON-
4oq9.pdb	U	C	-2.09192	-10.4828	SATELLITE TOBACCO MOSAIC VIRUS REFINED TO 1.4 A RESOLUTION USING NON-
4oq9.pdb	U	B	-2.09192	-10.4737	SATELLITE TOBACCO MOSAIC VIRUS REFINED TO 1.4 A RESOLUTION USING NON-
4oq9.pdb	U	E	-2.09192	-7.6845	SATELLITE TOBACCO MOSAIC VIRUS REFINED TO 1.4 A RESOLUTION USING NON-
4oq9.pdb	U	D	-2.09192	-10.5008	SATELLITE TOBACCO MOSAIC VIRUS REFINED TO 1.4 A RESOLUTION USING NON-
4oq9.pdb	U	G	-2.09192	-10.4828	SATELLITE TOBACCO MOSAIC VIRUS REFINED TO 1.4 A RESOLUTION USING NON-
4oq9.pdb	U	F	-2.09192	-8.89785	SATELLITE TOBACCO MOSAIC VIRUS REFINED TO 1.4 A RESOLUTION USING NON-
4oq9.pdb	U	I	-2.09192	-10.4919	SATELLITE TOBACCO MOSAIC VIRUS REFINED TO 1.4 A RESOLUTION USING NON-
4oq9.pdb	U	H	-2.09192	-10.4919	SATELLITE TOBACCO MOSAIC VIRUS REFINED TO 1.4 A RESOLUTION USING NON-
4oq9.pdb	U	K	-2.09192	-10.4828	SATELLITE TOBACCO MOSAIC VIRUS REFINED TO 1.4 A RESOLUTION USING NON-
4oq9.pdb	U	J	-2.09192	-10.4645	SATELLITE TOBACCO MOSAIC VIRUS REFINED TO 1.4 A RESOLUTION USING NON-
4oq9.pdb	U	M	-2.09192	-10.4737	SATELLITE TOBACCO MOSAIC VIRUS REFINED TO 1.4 A RESOLUTION USING NON-
4oq9.pdb	U	L	-2.09192	-10.4737	SATELLITE TOBACCO MOSAIC VIRUS REFINED TO 1.4 A RESOLUTION USING NON-
4oq9.pdb	U	O	-2.09192	-8.17891	SATELLITE TOBACCO MOSAIC VIRUS REFINED TO 1.4 A RESOLUTION USING NON-
4oq9.pdb	U	N	-2.09192	-10.4737	SATELLITE TOBACCO MOSAIC VIRUS REFINED TO 1.4 A RESOLUTION USING NON-
4oq9.pdb	T	A	-2.09192	-10.4737	SATELLITE TOBACCO MOSAIC VIRUS REFINED TO 1.4 A RESOLUTION USING NON-
4oq9.pdb	T	C	-2.09192	-10.4828	SATELLITE TOBACCO MOSAIC VIRUS REFINED TO 1.4 A RESOLUTION USING NON-
4oq9.pdb	T	B	-2.09192	-10.4737	SATELLITE TOBACCO MOSAIC VIRUS REFINED TO 1.4 A RESOLUTION USING NON-
4oq9.pdb	T	E	-2.09192	-8.90689	SATELLITE TOBACCO MOSAIC VIRUS REFINED TO 1.4 A RESOLUTION USING NON-
4oq9.pdb	T	D	-2.09192	-10.5008	SATELLITE TOBACCO MOSAIC VIRUS REFINED TO 1.4 A RESOLUTION USING NON-
4oq9.pdb	T	G	-2.09192	-10.4828	SATELLITE TOBACCO MOSAIC VIRUS REFINED TO 1.4 A RESOLUTION USING NON-
4oq9.pdb	T	F	-2.09192	-7.89785	SATELLITE TOBACCO MOSAIC VIRUS REFINED TO 1.4 A RESOLUTION USING NON-
4oq9.pdb	T	I	-2.09192	-10.4919	SATELLITE TOBACCO MOSAIC VIRUS REFINED TO 1.4 A RESOLUTION USING NON-
4oq9.pdb	T	H	-2.09192	-10.4919	SATELLITE TOBACCO MOSAIC VIRUS REFINED TO 1.4 A RESOLUTION USING NON-
4oq9.pdb	T	K	-2.09192	-10.4828	SATELLITE TOBACCO MOSAIC VIRUS REFINED TO 1.4 A RESOLUTION USING NON-
4oq9.pdb	T	J	-2.09192	-10.4645	SATELLITE TOBACCO MOSAIC VIRUS REFINED TO 1.4 A RESOLUTION USING NON-
4oq9.pdb	T	M	-2.09192	-10.4737	SATELLITE TOBACCO MOSAIC VIRUS REFINED TO 1.4 A RESOLUTION USING NON-
4oq9.pdb	T	L	-2.09192	-10.4737	SATELLITE TOBACCO MOSAIC VIRUS REFINED TO 1.4 A RESOLUTION USING NON-
4oq9.pdb	T	O	-2.09192	-10.5008	SATELLITE TOBACCO MOSAIC VIRUS REFINED TO 1.4 A RESOLUTION USING NON-
4oq9.pdb	T	N	-2.09192	-10.4737	SATELLITE TOBACCO MOSAIC VIRUS REFINED TO 1.4 A RESOLUTION USING NON-
4oq9.pdb	W	A	-2.09192	-10.4737	SATELLITE TOBACCO MOSAIC VIRUS REFINED TO 1.4 A RESOLUTION USING NON-
4oq9.pdb	W	C	-2.09192	-10.4828	SATELLITE TOBACCO MOSAIC VIRUS REFINED TO 1.4 A RESOLUTION USING NON-
4oq9.pdb	W	B	-2.09192	-10.4737	SATELLITE TOBACCO MOSAIC VIRUS REFINED TO 1.4 A RESOLUTION USING NON-
4oq9.pdb	W	E	-2.09192	-10.4919	SATELLITE TOBACCO MOSAIC VIRUS REFINED TO 1.4 A RESOLUTION USING NON-
4oq9.pdb	W	D	-2.09192	-10.5008	SATELLITE TOBACCO MOSAIC VIRUS REFINED TO 1.4 A RESOLUTION USING NON-
4oq9.pdb	W	G	-2.09192	-10.4828	SATELLITE TOBACCO MOSAIC VIRUS REFINED TO 1.4 A RESOLUTION USING NON-
4oq9.pdb	W	F	-2.09192	-10.4828	SATELLITE TOBACCO MOSAIC VIRUS REFINED TO 1.4 A RESOLUTION USING NON-
4oq9.pdb	W	I	-2.09192	-10.4919	SATELLITE TOBACCO MOSAIC VIRUS REFINED TO 1.4 A RESOLUTION USING NON-
4oq9.pdb	W	H	-2.09192	-9.49185	SATELLITE TOBACCO MOSAIC VIRUS REFINED TO 1.4 A RESOLUTION USING NON-
4oq9.pdb	W	K	-2.09192	-10.4828	SATELLITE TOBACCO MOSAIC VIRUS REFINED TO 1.4 A RESOLUTION USING NON-
4oq9.pdb	W	J	-2.09192	-10.4645	SATELLITE TOBACCO MOSAIC VIRUS REFINED TO 1.4 A RESOLUTION USING NON-
4oq9.pdb	W	M	-2.09192	-10.4737	SATELLITE TOBACCO MOSAIC VIRUS REFINED TO 1.4 A RESOLUTION USING NON-
4oq9.pdb	W	L	-2.09192	-10.4737	SATELLITE TOBACCO MOSAIC VIRUS REFINED TO 1.4 A RESOLUTION USING NON-
4oq9.pdb	W	O	-2.09192	-10.5008	SATELLITE TOBACCO MOSAIC VIRUS REFINED TO 1.4 A RESOLUTION USING NON-
4oq9.pdb	W	N	-2.09192	-10.4737	SATELLITE TOBACCO MOSAIC VIRUS REFINED TO 1.4 A RESOLUTION USING NON-
4oq9.pdb	V	A	-2.09192	-10.4737	SATELLITE TOBACCO MOSAIC VIRUS REFINED TO 1.4 A RESOLUTION USING NON-
4oq9.pdb	V	C	-2.09192	-10.4828	SATELLITE TOBACCO MOSAIC VIRUS REFINED TO 1.4 A RESOLUTION USING NON-
4oq9.pdb	V	B	-2.09192	-10.4737	SATELLITE TOBACCO MOSAIC VIRUS REFINED TO 1.4 A RESOLUTION USING NON-
4oq9.pdb	V	E	-2.09192	-10.4919	SATELLITE TOBACCO MOSAIC VIRUS REFINED TO 1.4 A RESOLUTION USING NON-
4oq9.pdb	V	D	-2.09192	-8.17891	SATELLITE TOBACCO MOSAIC VIRUS REFINED TO 1.4 A RESOLUTION USING NON-
4oq9.pdb	V	G	-2.09192	-8.89785	SATELLITE TOBACCO MOSAIC VIRUS REFINED TO 1.4 A RESOLUTION USING NON-
4oq9.pdb	V	F	-2.09192	-10.4828	SATELLITE TOBACCO MOSAIC VIRUS REFINED TO 1.4 A RESOLUTION USING NON-
4oq9.pdb	V	I	-2.09192	-10.4919	SATELLITE TOBACCO MOSAIC VIRUS REFINED TO 1.4 A RESOLUTION USING NON-
4oq9.pdb	V	H	-2.09192	-10.4919	SATELLITE TOBACCO MOSAIC VIRUS REFINED TO 1.4 A RESOLUTION USING NON-
4oq9.pdb	V	K	-2.09192	-10.4828	SATELLITE TOBACCO MOSAIC VIRUS REFINED TO 1.4 A RESOLUTION USING NON-
4oq9.pdb	V	J	-2.09192	-10.4645	SATELLITE TOBACCO MOSAIC VIRUS REFINED TO 1.4 A RESOLUTION USING NON-
4oq9.pdb	V	M	-2.09192	-10.4737	SATELLITE TOBACCO MOSAIC VIRUS REFINED TO 1.4 A RESOLUTION USING NON-
4oq9.pdb	V	L	-2.09192	-10.4737	SATELLITE TOBACCO MOSAIC VIRUS REFINED TO 1.4 A RESOLUTION USING NON-
4oq9.pdb	V	O	-2.09192	-10.5008	SATELLITE TOBACCO MOSAIC VIRUS REFINED TO 1.4 A RESOLUTION USING NON-
4oq9.pdb	V	N	-2.09192	-10.4737	SATELLITE TOBACCO MOSAIC VIRUS REFINED TO 1.4 A RESOLUTION USING NON-
4oq9.pdb	Y	A	-2.09192	-10.4737	SATELLITE TOBACCO MOSAIC VIRUS REFINED TO 1.4 A RESOLUTION USING NON-
4oq9.pdb	Y	C	-2.09192	-10.4828	SATELLITE TOBACCO MOSAIC VIRUS REFINED TO 1.4 A RESOLUTION USING NON-
4oq9.pdb	Y	B	-2.09192	-10.4737	SATELLITE TOBACCO MOSAIC VIRUS REFINED TO 1.4 A RESOLUTION USING NON-
4oq9.pdb	Y	E	-2.09192	-10.4919	SATELLITE TOBACCO MOSAIC VIRUS REFINED TO 1.4 A RESOLUTION USING NON-
4oq9.pdb	Y	D	-2.09192	-10.5008	SATELLITE TOBACCO MOSAIC VIRUS REFINED TO 1.4 A RESOLUTION USING NON-
4oq9.pdb	Y	G	-2.09192	-10.4828	SATELLITE TOBACCO MOSAIC VIRUS REFINED TO 1.4 A RESOLUTION USING NON-
4oq9.pdb	Y	F	-2.09192	-10.4828	SATELLITE TOBACCO MOSAIC VIRUS REFINED TO 1.4 A RESOLUTION USING NON-
4oq9.pdb	Y	I	-2.09192	-10.4919	SATELLITE TOBACCO MOSAIC VIRUS REFINED TO 1.4 A RESOLUTION USING NON-
4oq9.pdb	Y	H	-2.09192	-10.4919	SATELLITE TOBACCO MOSAIC VIRUS REFINED TO 1.4 A RESOLUTION USING NON-
4oq9.pdb	Y	K	-2.09192	-7.67545	SATELLITE TOBACCO MOSAIC VIRUS REFINED TO 1.4 A RESOLUTION USING NON-
4oq9.pdb	Y	J	-2.09192	-9.46455	SATELLITE TOBACCO MOSAIC VIRUS REFINED TO 1.4 A RESOLUTION USING NON-
4oq9.pdb	Y	M	-2.09192	-10.4737	SATELLITE TOBACCO MOSAIC VIRUS REFINED TO 1.4 A RESOLUTION USING NON-
4oq9.pdb	Y	L	-2.09192	-10.4737	SATELLITE TOBACCO MOSAIC VIRUS REFINED TO 1.4 A RESOLUTION USING NON-
4oq9.pdb	Y	O	-2.09192	-10.5008	SATELLITE TOBACCO MOSAIC VIRUS REFINED TO 1.4 A RESOLUTION USING NON-
4oq9.pdb	Y	N	-2.09192	-10.4737	SATELLITE TOBACCO MOSAIC VIRUS REFINED TO 1.4 A RESOLUTION USING NON-
4oq9.pdb	X	A	-2.09192	-10.4737	SATELLITE TOBACCO MOSAIC VIRUS REFINED TO 1.4 A RESOLUTION USING NON-
4oq9.pdb	X	C	-2.09192	-10.4828	SATELLITE TOBACCO MOSAIC VIRUS REFINED TO 1.4 A RESOLUTION USING NON-
4oq9.pdb	X	B	-2.09192	-10.4737	SATELLITE TOBACCO MOSAIC VIRUS REFINED TO 1.4 A RESOLUTION USING NON-
4oq9.pdb	X	E	-2.09192	-10.4919	SATELLITE TOBACCO MOSAIC VIRUS REFINED TO 1.4 A RESOLUTION USING NON-
4oq9.pdb	X	D	-2.09192	-10.5008	SATELLITE TOBACCO MOSAIC VIRUS REFINED TO 1.4 A RESOLUTION USING NON-
4oq9.pdb	X	G	-2.09192	-10.4828	SATELLITE TOBACCO MOSAIC VIRUS REFINED TO 1.4 A RESOLUTION USING NON-
4oq9.pdb	X	F	-2.09192	-10.4828	SATELLITE TOBACCO MOSAIC VIRUS REFINED TO 1.4 A RESOLUTION USING NON-
4oq9.pdb	X	I	-2.09192	-9.49185	SATELLITE TOBACCO MOSAIC VIRUS REFINED TO 1.4 A RESOLUTION USING NON-
4oq9.pdb	X	H	-2.09192	-10.4919	SATELLITE TOBACCO MOSAIC VIRUS REFINED TO 1.4 A RESOLUTION USING NON-
4oq9.pdb	X	K	-2.09192	-10.4828	SATELLITE TOBACCO MOSAIC VIRUS REFINED TO 1.4 A RESOLUTION USING NON-
4oq9.pdb	X	J	-2.09192	-10.4645	SATELLITE TOBACCO MOSAIC VIRUS REFINED TO 1.4 A RESOLUTION USING NON-
4oq9.pdb	X	M	-2.09192	-10.4737	SATELLITE TOBACCO MOSAIC VIRUS REFINED TO 1.4 A RESOLUTION USING NON-
4oq9.pdb	X	L	-2.09192	-10.4737	SATELLITE TOBACCO MOSAIC VIRUS REFINED TO 1.4 A RESOLUTION USING NON-
4oq9.pdb	X	O	-2.09192	-10.5008	SATELLITE TOBACCO MOSAIC VIRUS REFINED TO 1.4 A RESOLUTION USING NON-
4oq9.pdb	X	N	-2.09192	-10.4737	SATELLITE TOBACCO MOSAIC VIRUS REFINED TO 1.4 A RESOLUTION USING NON-
4oq9.pdb	Z	A	-2.09192	-10.4737	SATELLITE TOBACCO MOSAIC VIRUS REFINED TO 1.4 A RESOLUTION USING NON-
4oq9.pdb	Z	C	-2.09192	-10.4828	SATELLITE TOBACCO MOSAIC VIRUS REFINED TO 1.4 A RESOLUTION USING NON-
4oq9.pdb	Z	B	-2.09192	-10.4737	SATELLITE TOBACCO MOSAIC VIRUS REFINED TO 1.4 A RESOLUTION USING NON-
4oq9.pdb	Z	E	-2.09192	-8.16993	SATELLITE TOBACCO MOSAIC VIRUS REFINED TO 1.4 A RESOLUTION USING NON-
4oq9.pdb	Z	D	-2.09192	-10.5008	SATELLITE TOBACCO MOSAIC VIRUS REFINED TO 1.4 A RESOLUTION USING NON-
4oq9.pdb	Z	G	-2.09192	-10.4828	SATELLITE TOBACCO MOSAIC VIRUS REFINED TO 1.4 A RESOLUTION USING NON-
4oq9.pdb	Z	F	-2.09192	-10.4828	SATELLITE TOBACCO MOSAIC VIRUS REFINED TO 1.4 A RESOLUTION USING NON-
4oq9.pdb	Z	I	-2.09192	-10.4919	SATELLITE TOBACCO MOSAIC VIRUS REFINED TO 1.4 A RESOLUTION USING NON-
4oq9.pdb	Z	H	-2.09192	-10.4919	SATELLITE TOBACCO MOSAIC VIRUS REFINED TO 1.4 A RESOLUTION USING NON-
4oq9.pdb	Z	K	-2.09192	-9.48281	SATELLITE TOBACCO MOSAIC VIRUS REFINED TO 1.4 A RESOLUTION USING NON-
4oq9.pdb	Z	J	-2.09192	-7.87958	SATELLITE TOBACCO MOSAIC VIRUS REFINED TO 1.4 A RESOLUTION USING NON-
4oq9.pdb	Z	M	-2.09192	-10.4737	SATELLITE TOBACCO MOSAIC VIRUS REFINED TO 1.4 A RESOLUTION USING NON-
4oq9.pdb	Z	L	-2.09192	-10.4737	SATELLITE TOBACCO MOSAIC VIRUS REFINED TO 1.4 A RESOLUTION USING NON-
4oq9.pdb	Z	O	-2.09192	-10.5008	SATELLITE TOBACCO MOSAIC VIRUS REFINED TO 1.4 A RESOLUTION USING NON-
4oq9.pdb	Z	N	-2.09192	-10.4737	SATELLITE TOBACCO MOSAIC VIRUS REFINED TO 1.4 A RESOLUTION USING NON-
4oq9.pdb	a	A	-2.09192	-10.4737	SATELLITE TOBACCO MOSAIC VIRUS REFINED TO 1.4 A RESOLUTION USING NON-
4oq9.pdb	a	C	-2.09192	-10.4828	SATELLITE TOBACCO MOSAIC VIRUS REFINED TO 1.4 A RESOLUTION USING NON-
4oq9.pdb	a	B	-2.09192	-10.4737	SATELLITE TOBACCO MOSAIC VIRUS REFINED TO 1.4 A RESOLUTION USING NON-
4oq9.pdb	a	E	-2.09192	-10.4919	SATELLITE TOBACCO MOSAIC VIRUS REFINED TO 1.4 A RESOLUTION USING NON-
4oq9.pdb	a	D	-2.09192	-10.5008	SATELLITE TOBACCO MOSAIC VIRUS REFINED TO 1.4 A RESOLUTION USING NON-
4oq9.pdb	a	G	-2.09192	-10.4828	SATELLITE TOBACCO MOSAIC VIRUS REFINED TO 1.4 A RESOLUTION USING NON-
4oq9.pdb	a	F	-2.09192	-10.4828	SATELLITE TOBACCO MOSAIC VIRUS REFINED TO 1.4 A RESOLUTION USING NON-
4oq9.pdb	a	I	-2.09192	-8.16993	SATELLITE TOBACCO MOSAIC VIRUS REFINED TO 1.4 A RESOLUTION USING NON-
4oq9.pdb	a	H	-2.09192	-10.4919	SATELLITE TOBACCO MOSAIC VIRUS REFINED TO 1.4 A RESOLUTION USING NON-
4oq9.pdb	a	K	-2.09192	-10.4828	SATELLITE TOBACCO MOSAIC VIRUS REFINED TO 1.4 A RESOLUTION USING NON-
4oq9.pdb	a	J	-2.09192	-10.4645	SATELLITE TOBACCO MOSAIC VIRUS REFINED TO 1.4 A RESOLUTION USING NON-
4oq9.pdb	a	M	-2.09192	-10.4737	SATELLITE TOBACCO MOSAIC VIRUS REFINED TO 1.4 A RESOLUTION USING NON-
4oq9.pdb	a	L	-2.09192	-9.47371	SATELLITE TOBACCO MOSAIC VIRUS REFINED TO 1.4 A RESOLUTION USING NON-
4oq9.pdb	a	O	-2.09192	-10.5008	SATELLITE TOBACCO MOSAIC VIRUS REFINED TO 1.4 A RESOLUTION USING NON-
4oq9.pdb	a	N	-2.09192	-10.4737	SATELLITE TOBACCO MOSAIC VIRUS REFINED TO 1.4 A RESOLUTION USING NON-
4oq9.pdb	c	A	-2.09192	-10.4737	SATELLITE TOBACCO MOSAIC VIRUS REFINED TO 1.4 A RESOLUTION USING NON-
4oq9.pdb	c	C	-2.09192	-10.4828	SATELLITE TOBACCO MOSAIC VIRUS REFINED TO 1.4 A RESOLUTION USING NON-
4oq9.pdb	c	B	-2.09192	-10.4737	SATELLITE TOBACCO MOSAIC VIRUS REFINED TO 1.4 A RESOLUTION USING NON-
4oq9.pdb	c	E	-2.09192	-10.4919	SATELLITE TOBACCO MOSAIC VIRUS REFINED TO 1.4 A RESOLUTION USING NON-
4oq9.pdb	c	D	-2.09192	-10.5008	SATELLITE TOBACCO MOSAIC VIRUS REFINED TO 1.4 A RESOLUTION USING NON-
4oq9.pdb	c	G	-2.09192	-10.4828	SATELLITE TOBACCO MOSAIC VIRUS REFINED TO 1.4 A RESOLUTION USING NON-
4oq9.pdb	c	F	-2.09192	-10.4828	SATELLITE TOBACCO MOSAIC VIRUS REFINED TO 1.4 A RESOLUTION USING NON-
4oq9.pdb	c	I	-2.09192	-10.4919	SATELLITE TOBACCO MOSAIC VIRUS REFINED TO 1.4 A RESOLUTION USING NON-
4oq9.pdb	c	H	-2.09192	-10.4919	SATELLITE TOBACCO MOSAIC VIRUS REFINED TO 1.4 A RESOLUTION USING NON-
4oq9.pdb	c	K	-2.09192	-10.4828	SATELLITE TOBACCO MOSAIC VIRUS REFINED TO 1.4 A RESOLUTION USING NON-
4oq9.pdb	c	J	-2.09192	-10.4645	SATELLITE TOBACCO MOSAIC VIRUS REFINED TO 1.4 A RESOLUTION USING NON-
4oq9.pdb	c	M	-2.09192	-10.4737	SATELLITE TOBACCO MOSAIC VIRUS REFINED TO 1.4 A RESOLUTION USING NON-
4oq9.pdb	c	L	-2.09192	-10.4737	SATELLITE TOBACCO MOSAIC VIRUS REFINED TO 1.4 A RESOLUTION USING NON-
4oq9.pdb	c	O	-2.09192	-10.5008	SATELLITE TOBACCO MOSAIC VIRUS REFINED TO 1.4 A RESOLUTION USING NON-
4oq9.pdb	c	N	-2.09192	-9.47371	SATELLITE TOBACCO MOSAIC VIRUS REFINED TO 1.4 A RESOLUTION USING NON-
4oq9.pdb	b	A	-2.09192	-10.4737	SATELLITE TOBACCO MOSAIC VIRUS REFINED TO 1.4 A RESOLUTION USING NON-
4oq9.pdb	b	C	-2.09192	-10.4828	SATELLITE TOBACCO MOSAIC VIRUS REFINED TO 1.4 A RESOLUTION USING NON-
4oq9.pdb	b	B	-2.09192	-10.4737	SATELLITE TOBACCO MOSAIC VIRUS REFINED TO 1.4 A RESOLUTION USING NON-
4oq9.pdb	b	E	-2.09192	-10.4919	SATELLITE TOBACCO MOSAIC VIRUS REFINED TO 1.4 A RESOLUTION USING NON-
4oq9.pdb	b	D	-2.09192	-10.5008	SATELLITE TOBACCO MOSAIC VIRUS REFINED TO 1.4 A RESOLUTION USING NON-
4oq9.pdb	b	G	-2.09192	-10.4828	SATELLITE TOBACCO MOSAIC VIRUS REFINED TO 1.4 A RESOLUTION USING NON-
4oq9.pdb	b	F	-2.09192	-10.4828	SATELLITE TOBACCO MOSAIC VIRUS REFINED TO 1.4 A RESOLUTION USING NON-
4oq9.pdb	b	I	-2.09192	-10.4919	SATELLITE TOBACCO MOSAIC VIRUS REFINED TO 1.4 A RESOLUTION USING NON-
4oq9.pdb	b	H	-2.09192	-10.4919	SATELLITE TOBACCO MOSAIC VIRUS REFINED TO 1.4 A RESOLUTION USING NON-
4oq9.pdb	b	K	-2.09192	-10.4828	SATELLITE TOBACCO MOSAIC VIRUS REFINED TO 1.4 A RESOLUTION USING NON-
4oq9.pdb	b	J	-2.09192	-10.4645	SATELLITE TOBACCO MOSAIC VIRUS REFINED TO 1.4 A RESOLUTION USING NON-
4oq9.pdb	b	M	-2.09192	-9.47371	SATELLITE TOBACCO MOSAIC VIRUS REFINED TO 1.4 A RESOLUTION USING NON-
4oq9.pdb	b	L	-2.09192	-10.4737	SATELLITE TOBACCO MOSAIC VIRUS REFINED TO 1.4 A RESOLUTION USING NON-
4oq9.pdb	b	O	-2.09192	-10.5008	SATELLITE TOBACCO MOSAIC VIRUS REFINED TO 1.4 A RESOLUTION USING NON-
4oq9.pdb	b	N	-2.09192	-10.4737	SATELLITE TOBACCO MOSAIC VIRUS REFINED TO 1.4 A RESOLUTION USING NON-
4oq9.pdb	e	A	-2.09192	-7.88874	SATELLITE TOBACCO MOSAIC VIRUS REFINED TO 1.4 A RESOLUTION USING NON-
4oq9.pdb	e	C	-2.09192	-10.4828	SATELLITE TOBACCO MOSAIC VIRUS REFINED TO 1.4 A RESOLUTION USING NON-
4oq9.pdb	e	B	-2.09192	-10.4737	SATELLITE TOBACCO MOSAIC VIRUS REFINED TO 1.4 A RESOLUTION USING NON-
4oq9.pdb	e	E	-2.09192	-10.4919	SATELLITE TOBACCO MOSAIC VIRUS REFINED TO 1.4 A RESOLUTION USING NON-
4oq9.pdb	e	D	-2.09192	-10.5008	SATELLITE TOBACCO MOSAIC VIRUS REFINED TO 1.4 A RESOLUTION USING NON-
4oq9.pdb	e	G	-2.09192	-10.4828	SATELLITE TOBACCO MOSAIC VIRUS REFINED TO 1.4 A RESOLUTION USING NON-
4oq9.pdb	e	F	-2.09192	-10.4828	SATELLITE TOBACCO MOSAIC VIRUS REFINED TO 1.4 A RESOLUTION USING NON-
4oq9.pdb	e	I	-2.09192	-10.4919	SATELLITE TOBACCO MOSAIC VIRUS REFINED TO 1.4 A RESOLUTION USING NON-
4oq9.pdb	e	H	-2.09192	-10.4919	SATELLITE TOBACCO MOSAIC VIRUS REFINED TO 1.4 A RESOLUTION USING NON-
4oq9.pdb	e	K	-2.09192	-10.4828	SATELLITE TOBACCO MOSAIC VIRUS REFINED TO 1.4 A RESOLUTION USING NON-
4oq9.pdb	e	J	-2.09192	-10.4645	SATELLITE TOBACCO MOSAIC VIRUS REFINED TO 1.4 A RESOLUTION USING NON-
4oq9.pdb	e	M	-2.09192	-10.4737	SATELLITE TOBACCO MOSAIC VIRUS REFINED TO 1.4 A RESOLUTION USING NON-
4oq9.pdb	e	L	-2.09192	-10.4737	SATELLITE TOBACCO MOSAIC VIRUS REFINED TO 1.4 A RESOLUTION USING NON-
4oq9.pdb	e	O	-2.09192	-9.50084	SATELLITE TOBACCO MOSAIC VIRUS REFINED TO 1.4 A RESOLUTION USING NON-
4oq9.pdb	e	N	-2.09192	-10.4737	SATELLITE TOBACCO MOSAIC VIRUS REFINED TO 1.4 A RESOLUTION USING NON-
4oq9.pdb	d	A	-2.09192	-7.88874	SATELLITE TOBACCO MOSAIC VIRUS REFINED TO 1.4 A RESOLUTION USING NON-
4oq9.pdb	d	C	-2.09192	-10.4828	SATELLITE TOBACCO MOSAIC VIRUS REFINED TO 1.4 A RESOLUTION USING NON-
4oq9.pdb	d	B	-2.09192	-10.4737	SATELLITE TOBACCO MOSAIC VIRUS REFINED TO 1.4 A RESOLUTION USING NON-
4oq9.pdb	d	E	-2.09192	-10.4919	SATELLITE TOBACCO MOSAIC VIRUS REFINED TO 1.4 A RESOLUTION USING NON-
4oq9.pdb	d	D	-2.09192	-10.5008	SATELLITE TOBACCO MOSAIC VIRUS REFINED TO 1.4 A RESOLUTION USING NON-
4oq9.pdb	d	G	-2.09192	-10.4828	SATELLITE TOBACCO MOSAIC VIRUS REFINED TO 1.4 A RESOLUTION USING NON-
4oq9.pdb	d	F	-2.09192	-10.4828	SATELLITE TOBACCO MOSAIC VIRUS REFINED TO 1.4 A RESOLUTION USING NON-
4oq9.pdb	d	I	-2.09192	-10.4919	SATELLITE TOBACCO MOSAIC VIRUS REFINED TO 1.4 A RESOLUTION USING NON-
4oq9.pdb	d	H	-2.09192	-10.4919	SATELLITE TOBACCO MOSAIC VIRUS REFINED TO 1.4 A RESOLUTION USING NON-
4oq9.pdb	d	K	-2.09192	-10.4828	SATELLITE TOBACCO MOSAIC VIRUS REFINED TO 1.4 A RESOLUTION USING NON-
4oq9.pdb	d	J	-2.09192	-10.4645	SATELLITE TOBACCO MOSAIC VIRUS REFINED TO 1.4 A RESOLUTION USING NON-
4oq9.pdb	d	M	-2.09192	-10.4737	SATELLITE TOBACCO MOSAIC VIRUS REFINED TO 1.4 A RESOLUTION USING NON-
4oq9.pdb	d	L	-2.09192	-10.4737	SATELLITE TOBACCO MOSAIC VIRUS REFINED TO 1.4 A RESOLUTION USING NON-
4oq9.pdb	d	O	-2.09192	-9.50084	SATELLITE TOBACCO MOSAIC VIRUS REFINED TO 1.4 A RESOLUTION USING NON-
4oq9.pdb	d	N	-2.09192	-10.4737	SATELLITE TOBACCO MOSAIC VIRUS REFINED TO 1.4 A RESOLUTION USING NON-
4oq9.pdb	g	A	-2.09192	-10.4737	SATELLITE TOBACCO MOSAIC VIRUS REFINED TO 1.4 A RESOLUTION USING NON-
4oq9.pdb	g	C	-2.09192	-7.89785	SATELLITE TOBACCO MOSAIC VIRUS REFINED TO 1.4 A RESOLUTION USING NON-
4oq9.pdb	g	B	-2.09192	-10.4737	SATELLITE TOBACCO MOSAIC VIRUS REFINED TO 1.4 A RESOLUTION USING NON-
4oq9.pdb	g	E	-2.09192	-10.4919	SATELLITE TOBACCO MOSAIC VIRUS REFINED TO 1.4 A RESOLUTION USING NON-
4oq9.pdb	g	D	-2.09192	-10.5008	SATELLITE TOBACCO MOSAIC VIRUS REFINED TO 1.4 A RESOLUTION USING NON-
4oq9.pdb	g	G	-2.09192	-10.4828	SATELLITE TOBACCO MOSAIC VIRUS REFINED TO 1.4 A RESOLUTION USING NON-
4oq9.pdb	g	F	-2.09192	-10.4828	SATELLITE TOBACCO MOSAIC VIRUS REFINED TO 1.4 A RESOLUTION USING NON-
4oq9.pdb	g	I	-2.09192	-10.4919	SATELLITE TOBACCO MOSAIC VIRUS REFINED TO 1.4 A RESOLUTION USING NON-
4oq9.pdb	g	H	-2.09192	-10.4919	SATELLITE TOBACCO MOSAIC VIRUS REFINED TO 1.4 A RESOLUTION USING NON-
4oq9.pdb	g	K	-2.09192	-10.4828	SATELLITE TOBACCO MOSAIC VIRUS REFINED TO 1.4 A RESOLUTION USING NON-
4oq9.pdb	g	J	-2.09192	-10.4645	SATELLITE TOBACCO MOSAIC VIRUS REFINED TO 1.4 A RESOLUTION USING NON-
4oq9.pdb	g	M	-2.09192	-10.4737	SATELLITE TOBACCO MOSAIC VIRUS REFINED TO 1.4 A RESOLUTION USING NON-
4oq9.pdb	g	L	-2.09192	-10.4737	SATELLITE TOBACCO MOSAIC VIRUS REFINED TO 1.4 A RESOLUTION USING NON-
4oq9.pdb	g	O	-2.09192	-10.5008	SATELLITE TOBACCO MOSAIC VIRUS REFINED TO 1.4 A RESOLUTION USING NON-
4oq9.pdb	g	N	-2.09192	-10.4737	SATELLITE TOBACCO MOSAIC VIRUS REFINED TO 1.4 A RESOLUTION USING NON-
4oq9.pdb	f	A	-2.09192	-10.4737	SATELLITE TOBACCO MOSAIC VIRUS REFINED TO 1.4 A RESOLUTION USING NON-
4oq9.pdb	f	C	-2.09192	-10.4828	SATELLITE TOBACCO MOSAIC VIRUS REFINED TO 1.4 A RESOLUTION USING NON-
4oq9.pdb	f	B	-2.09192	-7.88874	SATELLITE TOBACCO MOSAIC VIRUS REFINED TO 1.4 A RESOLUTION USING NON-
4oq9.pdb	f	E	-2.09192	-10.4919	SATELLITE TOBACCO MOSAIC VIRUS REFINED TO 1.4 A RESOLUTION USING NON-
4oq9.pdb	f	D	-2.09192	-10.5008	SATELLITE TOBACCO MOSAIC VIRUS REFINED TO 1.4 A RESOLUTION USING NON-
4oq9.pdb	f	G	-2.09192	-10.4828	SATELLITE TOBACCO MOSAIC VIRUS REFINED TO 1.4 A RESOLUTION USING NON-
4oq9.pdb	f	F	-2.09192	-10.4828	SATELLITE TOBACCO MOSAIC VIRUS REFINED TO 1.4 A RESOLUTION USING NON-
4oq9.pdb	f	I	-2.09192	-10.4919	SATELLITE TOBACCO MOSAIC VIRUS REFINED TO 1.4 A RESOLUTION USING NON-
4oq9.pdb	f	H	-2.09192	-10.4919	SATELLITE TOBACCO MOSAIC VIRUS REFINED TO 1.4 A RESOLUTION USING NON-
4oq9.pdb	f	K	-2.09192	-10.4828	SATELLITE TOBACCO MOSAIC VIRUS REFINED TO 1.4 A RESOLUTION USING NON-
4oq9.pdb	f	J	-2.09192	-10.4645	SATELLITE TOBACCO MOSAIC VIRUS REFINED TO 1.4 A RESOLUTION USING NON-
4oq9.pdb	f	M	-2.09192	-10.4737	SATELLITE TOBACCO MOSAIC VIRUS REFINED TO 1.4 A RESOLUTION USING NON-
4oq9.pdb	f	L	-2.09192	-10.4737	SATELLITE TOBACCO MOSAIC VIRUS REFINED TO 1.4 A RESOLUTION USING NON-
4oq9.pdb	f	O	-2.09192	-10.5008	SATELLITE TOBACCO MOSAIC VIRUS REFINED TO 1.4 A RESOLUTION USING NON-
4oq9.pdb	f	N	-2.09192	-10.4737	SATELLITE TOBACCO MOSAIC VIRUS REFINED TO 1.4 A RESOLUTION USING NON-
4oq9.pdb	i	A	-2.09192	-10.4737	SATELLITE TOBACCO MOSAIC VIRUS REFINED TO 1.4 A RESOLUTION USING NON-
4oq9.pdb	i	C	-2.09192	-10.4828	SATELLITE TOBACCO MOSAIC VIRUS REFINED TO 1.4 A RESOLUTION USING NON-
4oq9.pdb	i	B	-2.09192	-10.4737	SATELLITE TOBACCO MOSAIC VIRUS REFINED TO 1.4 A RESOLUTION USING NON-
4oq9.pdb	i	E	-2.09192	-7.6845	SATELLITE TOBACCO MOSAIC VIRUS REFINED TO 1.4 A RESOLUTION USING NON-
4oq9.pdb	i	D	-2.09192	-10.5008	SATELLITE TOBACCO MOSAIC VIRUS REFINED TO 1.4 A RESOLUTION USING NON-
4oq9.pdb	i	G	-2.09192	-10.4828	SATELLITE TOBACCO MOSAIC VIRUS REFINED TO 1.4 A RESOLUTION USING NON-
4oq9.pdb	i	F	-2.09192	-9.48281	SATELLITE TOBACCO MOSAIC VIRUS REFINED TO 1.4 A RESOLUTION USING NON-
4oq9.pdb	i	I	-2.09192	-10.4919	SATELLITE TOBACCO MOSAIC VIRUS REFINED TO 1.4 A RESOLUTION USING NON-
4oq9.pdb	i	H	-2.09192	-10.4919	SATELLITE TOBACCO MOSAIC VIRUS REFINED TO 1.4 A RESOLUTION USING NON-
4oq9.pdb	i	K	-2.09192	-10.4828	SATELLITE TOBACCO MOSAIC VIRUS REFINED TO 1.4 A RESOLUTION USING NON-
4oq9.pdb	i	J	-2.09192	-10.4645	SATELLITE TOBACCO MOSAIC VIRUS REFINED TO 1.4 A RESOLUTION USING NON-
4oq9.pdb	i	M	-2.09192	-10.4737	SATELLITE TOBACCO MOSAIC VIRUS REFINED TO 1.4 A RESOLUTION USING NON-
4oq9.pdb	i	L	-2.09192	-10.4737	SATELLITE TOBACCO MOSAIC VIRUS REFINED TO 1.4 A RESOLUTION USING NON-
4oq9.pdb	i	O	-2.09192	-8.17891	SATELLITE TOBACCO MOSAIC VIRUS REFINED TO 1.4 A RESOLUTION USING NON-
4oq9.pdb	i	N	-2.09192	-10.4737	SATELLITE TOBACCO MOSAIC VIRUS REFINED TO 1.4 A RESOLUTION USING NON-
4oq9.pdb	h	A	-2.09192	-10.4737	SATELLITE TOBACCO MOSAIC VIRUS REFINED TO 1.4 A RESOLUTION USING NON-
4oq9.pdb	h	C	-2.09192	-10.4828	SATELLITE TOBACCO MOSAIC VIRUS REFINED TO 1.4 A RESOLUTION USING NON-
4oq9.pdb	h	B	-2.09192	-10.4737	SATELLITE TOBACCO MOSAIC VIRUS REFINED TO 1.4 A RESOLUTION USING NON-
4oq9.pdb	h	E	-2.09192	-10.4919	SATELLITE TOBACCO MOSAIC VIRUS REFINED TO 1.4 A RESOLUTION USING NON-
4oq9.pdb	h	D	-2.09192	-7.91588	SATELLITE TOBACCO MOSAIC VIRUS REFINED TO 1.4 A RESOLUTION USING NON-
4oq9.pdb	h	G	-2.09192	-10.4828	SATELLITE TOBACCO MOSAIC VIRUS REFINED TO 1.4 A RESOLUTION USING NON-
4oq9.pdb	h	F	-2.09192	-7.89785	SATELLITE TOBACCO MOSAIC VIRUS REFINED TO 1.4 A RESOLUTION USING NON-
4oq9.pdb	h	I	-2.09192	-10.4919	SATELLITE TOBACCO MOSAIC VIRUS REFINED TO 1.4 A RESOLUTION USING NON-
4oq9.pdb	h	H	-2.09192	-10.4919	SATELLITE TOBACCO MOSAIC VIRUS REFINED TO 1.4 A RESOLUTION USING NON-
4oq9.pdb	h	K	-2.09192	-10.4828	SATELLITE TOBACCO MOSAIC VIRUS REFINED TO 1.4 A RESOLUTION USING NON-
4oq9.pdb	h	J	-2.09192	-10.4645	SATELLITE TOBACCO MOSAIC VIRUS REFINED TO 1.4 A RESOLUTION USING NON-
4oq9.pdb	h	M	-2.09192	-10.4737	SATELLITE TOBACCO MOSAIC VIRUS REFINED TO 1.4 A RESOLUTION USING NON-
4oq9.pdb	h	L	-2.09192	-10.4737	SATELLITE TOBACCO MOSAIC VIRUS REFINED TO 1.4 A RESOLUTION USING NON-
4oq9.pdb	h	O	-2.09192	-10.5008	SATELLITE TOBACCO MOSAIC VIRUS REFINED TO 1.4 A RESOLUTION USING NON-
4oq9.pdb	h	N	-2.09192	-10.4737	SATELLITE TOBACCO MOSAIC VIRUS REFINED TO 1.4 A RESOLUTION USING NON-
4oq9.pdb	k	A	-2.09192	-10.4737	SATELLITE TOBACCO MOSAIC VIRUS REFINED TO 1.4 A RESOLUTION USING NON-
4oq9.pdb	k	C	-2.09192	-10.4828	SATELLITE TOBACCO MOSAIC VIRUS REFINED TO 1.4 A RESOLUTION USING NON-
4oq9.pdb	k	B	-2.09192	-10.4737	SATELLITE TOBACCO MOSAIC VIRUS REFINED TO 1.4 A RESOLUTION USING NON-
4oq9.pdb	k	E	-2.09192	-10.4919	SATELLITE TOBACCO MOSAIC VIRUS REFINED TO 1.4 A RESOLUTION USING NON-
4oq9.pdb	k	D	-2.09192	-10.5008	SATELLITE TOBACCO MOSAIC VIRUS REFINED TO 1.4 A RESOLUTION USING NON-
4oq9.pdb	k	G	-2.09192	-7.89785	SATELLITE TOBACCO MOSAIC VIRUS REFINED TO 1.4 A RESOLUTION USING NON-
4oq9.pdb	k	F	-2.09192	-10.4828	SATELLITE TOBACCO MOSAIC VIRUS REFINED TO 1.4 A RESOLUTION USING NON-
4oq9.pdb	k	I	-2.09192	-10.4919	SATELLITE TOBACCO MOSAIC VIRUS REFINED TO 1.4 A RESOLUTION USING NON-
4oq9.pdb	k	H	-2.09192	-10.4919	SATELLITE TOBACCO MOSAIC VIRUS REFINED TO 1.4 A RESOLUTION USING NON-
4oq9.pdb	k	K	-2.09192	-10.4828	SATELLITE TOBACCO MOSAIC VIRUS REFINED TO 1.4 A RESOLUTION USING NON-
4oq9.pdb	k	J	-2.09192	-10.4645	SATELLITE TOBACCO MOSAIC VIRUS REFINED TO 1.4 A RESOLUTION USING NON-
4oq9.pdb	k	M	-2.09192	-10.4737	SATELLITE TOBACCO MOSAIC VIRUS REFINED TO 1.4 A RESOLUTION USING NON-
4oq9.pdb	k	L	-2.09192	-10.4737	SATELLITE TOBACCO MOSAIC VIRUS REFINED TO 1.4 A RESOLUTION USING NON-
4oq9.pdb	k	O	-2.09192	-10.5008	SATELLITE TOBACCO MOSAIC VIRUS REFINED TO 1.4 A RESOLUTION USING NON-
4oq9.pdb	k	N	-2.09192	-10.4737	SATELLITE TOBACCO MOSAIC VIRUS REFINED TO 1.4 A RESOLUTION USING NON-
4oq9.pdb	j	A	-2.09192	-10.4737	SATELLITE TOBACCO MOSAIC VIRUS REFINED TO 1.4 A RESOLUTION USING NON-
4oq9.pdb	j	C	-2.09192	-10.4828	SATELLITE TOBACCO MOSAIC VIRUS REFINED TO 1.4 A RESOLUTION USING NON-
4oq9.pdb	j	B	-2.09192	-10.4737	SATELLITE TOBACCO MOSAIC VIRUS REFINED TO 1.4 A RESOLUTION USING NON-
4oq9.pdb	j	E	-2.09192	-9.49185	SATELLITE TOBACCO MOSAIC VIRUS REFINED TO 1.4 A RESOLUTION USING NON-
4oq9.pdb	j	D	-2.09192	-10.5008	SATELLITE TOBACCO MOSAIC VIRUS REFINED TO 1.4 A RESOLUTION USING NON-
4oq9.pdb	j	G	-2.09192	-10.4828	SATELLITE TOBACCO MOSAIC VIRUS REFINED TO 1.4 A RESOLUTION USING NON-
4oq9.pdb	j	F	-2.09192	-7.89785	SATELLITE TOBACCO MOSAIC VIRUS REFINED TO 1.4 A RESOLUTION USING NON-
4oq9.pdb	j	I	-2.09192	-10.4919	SATELLITE TOBACCO MOSAIC VIRUS REFINED TO 1.4 A RESOLUTION USING NON-
4oq9.pdb	j	H	-2.09192	-10.4919	SATELLITE TOBACCO MOSAIC VIRUS REFINED TO 1.4 A RESOLUTION USING NON-
4oq9.pdb	j	K	-2.09192	-10.4828	SATELLITE TOBACCO MOSAIC VIRUS REFINED TO 1.4 A RESOLUTION USING NON-
4oq9.pdb	j	J	-2.09192	-10.4645	SATELLITE TOBACCO MOSAIC VIRUS REFINED TO 1.4 A RESOLUTION USING NON-
4oq9.pdb	j	M	-2.09192	-10.4737	SATELLITE TOBACCO MOSAIC VIRUS REFINED TO 1.4 A RESOLUTION USING NON-
4oq9.pdb	j	L	-2.09192	-10.4737	SATELLITE TOBACCO MOSAIC VIRUS REFINED TO 1.4 A RESOLUTION USING NON-
4oq9.pdb	j	O	-2.09192	-10.5008	SATELLITE TOBACCO MOSAIC VIRUS REFINED TO 1.4 A RESOLUTION USING NON-
4oq9.pdb	j	N	-2.09192	-10.4737	SATELLITE TOBACCO MOSAIC VIRUS REFINED TO 1.4 A RESOLUTION USING NON-
4oq9.pdb	m	A	-2.09192	-10.4737	SATELLITE TOBACCO MOSAIC VIRUS REFINED TO 1.4 A RESOLUTION USING NON-
4oq9.pdb	m	C	-2.09192	-10.4828	SATELLITE TOBACCO MOSAIC VIRUS REFINED TO 1.4 A RESOLUTION USING NON-
4oq9.pdb	m	B	-2.09192	-10.4737	SATELLITE TOBACCO MOSAIC VIRUS REFINED TO 1.4 A RESOLUTION USING NON-
4oq9.pdb	m	E	-2.09192	-10.4919	SATELLITE TOBACCO MOSAIC VIRUS REFINED TO 1.4 A RESOLUTION USING NON-
4oq9.pdb	m	D	-2.09192	-10.5008	SATELLITE TOBACCO MOSAIC VIRUS REFINED TO 1.4 A RESOLUTION USING NON-
4oq9.pdb	m	G	-2.09192	-10.4828	SATELLITE TOBACCO MOSAIC VIRUS REFINED TO 1.4 A RESOLUTION USING NON-
4oq9.pdb	m	F	-2.09192	-10.4828	SATELLITE TOBACCO MOSAIC VIRUS REFINED TO 1.4 A RESOLUTION USING NON-
4oq9.pdb	m	I	-2.09192	-7.6845	SATELLITE TOBACCO MOSAIC VIRUS REFINED TO 1.4 A RESOLUTION USING NON-
4oq9.pdb	m	H	-2.09192	-10.4919	SATELLITE TOBACCO MOSAIC VIRUS REFINED TO 1.4 A RESOLUTION USING NON-
4oq9.pdb	m	K	-2.09192	-7.89785	SATELLITE TOBACCO MOSAIC VIRUS REFINED TO 1.4 A RESOLUTION USING NON-
4oq9.pdb	m	J	-2.09192	-10.4645	SATELLITE TOBACCO MOSAIC VIRUS REFINED TO 1.4 A RESOLUTION USING NON-
4oq9.pdb	m	M	-2.09192	-10.4737	SATELLITE TOBACCO MOSAIC VIRUS REFINED TO 1.4 A RESOLUTION USING NON-
4oq9.pdb	m	L	-2.09192	-10.4737	SATELLITE TOBACCO MOSAIC VIRUS REFINED TO 1.4 A RESOLUTION USING NON-
4oq9.pdb	m	O	-2.09192	-10.5008	SATELLITE TOBACCO MOSAIC VIRUS REFINED TO 1.4 A RESOLUTION USING NON-
4oq9.pdb	m	N	-2.09192	-10.4737	SATELLITE TOBACCO MOSAIC VIRUS REFINED TO 1.4 A RESOLUTION USING NON-
4oq9.pdb	l	A	-2.09192	-10.4737	SATELLITE TOBACCO MOSAIC VIRUS REFINED TO 1.4 A RESOLUTION USING NON-
4oq9.pdb	l	C	-2.09192	-10.4828	SATELLITE TOBACCO MOSAIC VIRUS REFINED TO 1.4 A RESOLUTION USING NON-
4oq9.pdb	l	B	-2.09192	-10.4737	SATELLITE TOBACCO MOSAIC VIRUS REFINED TO 1.4 A RESOLUTION USING NON-
4oq9.pdb	l	E	-2.09192	-10.4919	SATELLITE TOBACCO MOSAIC VIRUS REFINED TO 1.4 A RESOLUTION USING NON-
4oq9.pdb	l	D	-2.09192	-10.5008	SATELLITE TOBACCO MOSAIC VIRUS REFINED TO 1.4 A RESOLUTION USING NON-
4oq9.pdb	l	G	-2.09192	-10.4828	SATELLITE TOBACCO MOSAIC VIRUS REFINED TO 1.4 A RESOLUTION USING NON-
4oq9.pdb	l	F	-2.09192	-10.4828	SATELLITE TOBACCO MOSAIC VIRUS REFINED TO 1.4 A RESOLUTION USING NON-
4oq9.pdb	l	I	-2.09192	-10.4919	SATELLITE TOBACCO MOSAIC VIRUS REFINED TO 1.4 A RESOLUTION USING NON-
4oq9.pdb	l	H	-2.09192	-7.6845	SATELLITE TOBACCO MOSAIC VIRUS REFINED TO 1.4 A RESOLUTION USING NON-
4oq9.pdb	l	K	-2.09192	-10.4828	SATELLITE TOBACCO MOSAIC VIRUS REFINED TO 1.4 A RESOLUTION USING NON-
4oq9.pdb	l	J	-2.09192	-10.4645	SATELLITE TOBACCO MOSAIC VIRUS REFINED TO 1.4 A RESOLUTION USING NON-
4oq9.pdb	l	M	-2.09192	-10.4737	SATELLITE TOBACCO MOSAIC VIRUS REFINED TO 1.4 A RESOLUTION USING NON-
4oq9.pdb	l	L	-2.09192	-10.4737	SATELLITE TOBACCO MOSAIC VIRUS REFINED TO 1.4 A RESOLUTION USING NON-
4oq9.pdb	l	O	-2.09192	-10.5008	SATELLITE TOBACCO MOSAIC VIRUS REFINED TO 1.4 A RESOLUTION USING NON-
4oq9.pdb	l	N	-2.09192	-10.4737	SATELLITE TOBACCO MOSAIC VIRUS REFINED TO 1.4 A RESOLUTION USING NON-
4oq9.pdb	o	A	-2.09192	-10.4737	SATELLITE TOBACCO MOSAIC VIRUS REFINED TO 1.4 A RESOLUTION USING NON-
4oq9.pdb	o	C	-2.09192	-10.4828	SATELLITE TOBACCO MOSAIC VIRUS REFINED TO 1.4 A RESOLUTION USING NON-
4oq9.pdb	o	B	-2.09192	-10.4737	SATELLITE TOBACCO MOSAIC VIRUS REFINED TO 1.4 A RESOLUTION USING NON-
4oq9.pdb	o	E	-2.09192	-10.4919	SATELLITE TOBACCO MOSAIC VIRUS REFINED TO 1.4 A RESOLUTION USING NON-
4oq9.pdb	o	D	-2.09192	-10.5008	SATELLITE TOBACCO MOSAIC VIRUS REFINED TO 1.4 A RESOLUTION USING NON-
4oq9.pdb	o	G	-2.09192	-10.4828	SATELLITE TOBACCO MOSAIC VIRUS REFINED TO 1.4 A RESOLUTION USING NON-
4oq9.pdb	o	F	-2.09192	-10.4828	SATELLITE TOBACCO MOSAIC VIRUS REFINED TO 1.4 A RESOLUTION USING NON-
4oq9.pdb	o	I	-2.09192	-10.4919	SATELLITE TOBACCO MOSAIC VIRUS REFINED TO 1.4 A RESOLUTION USING NON-
4oq9.pdb	o	H	-2.09192	-10.4919	SATELLITE TOBACCO MOSAIC VIRUS REFINED TO 1.4 A RESOLUTION USING NON-
4oq9.pdb	o	K	-2.09192	-7.67545	SATELLITE TOBACCO MOSAIC VIRUS REFINED TO 1.4 A RESOLUTION USING NON-
4oq9.pdb	o	J	-2.09192	-9.46455	SATELLITE TOBACCO MOSAIC VIRUS REFINED TO 1.4 A RESOLUTION USING NON-
4oq9.pdb	o	M	-2.09192	-10.4737	SATELLITE TOBACCO MOSAIC VIRUS REFINED TO 1.4 A RESOLUTION USING NON-
4oq9.pdb	o	L	-2.09192	-10.4737	SATELLITE TOBACCO MOSAIC VIRUS REFINED TO 1.4 A RESOLUTION USING NON-
4oq9.pdb	o	O	-2.09192	-10.5008	SATELLITE TOBACCO MOSAIC VIRUS REFINED TO 1.4 A RESOLUTION USING NON-
4oq9.pdb	o	N	-2.09192	-10.4737	SATELLITE TOBACCO MOSAIC VIRUS REFINED TO 1.4 A RESOLUTION USING NON-
4oq9.pdb	n	A	-2.09192	-10.4737	SATELLITE TOBACCO MOSAIC VIRUS REFINED TO 1.4 A RESOLUTION USING NON-
4oq9.pdb	n	C	-2.09192	-10.4828	SATELLITE TOBACCO MOSAIC VIRUS REFINED TO 1.4 A RESOLUTION USING NON-
4oq9.pdb	n	B	-2.09192	-10.4737	SATELLITE TOBACCO MOSAIC VIRUS REFINED TO 1.4 A RESOLUTION USING NON-
4oq9.pdb	n	E	-2.09192	-7.90689	SATELLITE TOBACCO MOSAIC VIRUS REFINED TO 1.4 A RESOLUTION USING NON-
4oq9.pdb	n	D	-2.09192	-10.5008	SATELLITE TOBACCO MOSAIC VIRUS REFINED TO 1.4 A RESOLUTION USING NON-
4oq9.pdb	n	G	-2.09192	-10.4828	SATELLITE TOBACCO MOSAIC VIRUS REFINED TO 1.4 A RESOLUTION USING NON-
4oq9.pdb	n	F	-2.09192	-10.4828	SATELLITE TOBACCO MOSAIC VIRUS REFINED TO 1.4 A RESOLUTION USING NON-
4oq9.pdb	n	I	-2.09192	-10.4919	SATELLITE TOBACCO MOSAIC VIRUS REFINED TO 1.4 A RESOLUTION USING NON-
4oq9.pdb	n	H	-2.09192	-10.4919	SATELLITE TOBACCO MOSAIC VIRUS REFINED TO 1.4 A RESOLUTION USING NON-
4oq9.pdb	n	K	-2.09192	-9.48281	SATELLITE TOBACCO MOSAIC VIRUS REFINED TO 1.4 A RESOLUTION USING NON-
4oq9.pdb	n	J	-2.09192	-7.87958	SATELLITE TOBACCO MOSAIC VIRUS REFINED TO 1.4 A RESOLUTION USING NON-
4oq9.pdb	n	M	-2.09192	-10.4737	SATELLITE TOBACCO MOSAIC VIRUS REFINED TO 1.4 A RESOLUTION USING NON-
4oq9.pdb	n	L	-2.09192	-10.4737	SATELLITE TOBACCO MOSAIC VIRUS REFINED TO 1.4 A RESOLUTION USING NON-
4oq9.pdb	n	O	-2.09192	-10.5008	SATELLITE TOBACCO MOSAIC VIRUS REFINED TO 1.4 A RESOLUTION USING NON-
4oq9.pdb	n	N	-2.09192	-10.4737	SATELLITE TOBACCO MOSAIC VIRUS REFINED TO 1.4 A RESOLUTION USING NON-
4oq9.pdb	q	A	-2.09192	-10.4737	SATELLITE TOBACCO MOSAIC VIRUS REFINED TO 1.4 A RESOLUTION USING NON-
4oq9.pdb	q	C	-2.09192	-10.4828	SATELLITE TOBACCO MOSAIC VIRUS REFINED TO 1.4 A RESOLUTION USING NON-
4oq9.pdb	q	B	-2.09192	-10.4737	SATELLITE TOBACCO MOSAIC VIRUS REFINED TO 1.4 A RESOLUTION USING NON-
4oq9.pdb	q	E	-2.09192	-10.4919	SATELLITE TOBACCO MOSAIC VIRUS REFINED TO 1.4 A RESOLUTION USING NON-
4oq9.pdb	q	D	-2.09192	-10.5008	SATELLITE TOBACCO MOSAIC VIRUS REFINED TO 1.4 A RESOLUTION USING NON-
4oq9.pdb	q	G	-2.09192	-10.4828	SATELLITE TOBACCO MOSAIC VIRUS REFINED TO 1.4 A RESOLUTION USING NON-
4oq9.pdb	q	F	-2.09192	-10.4828	SATELLITE TOBACCO MOSAIC VIRUS REFINED TO 1.4 A RESOLUTION USING NON-
4oq9.pdb	q	I	-2.09192	-10.4919	SATELLITE TOBACCO MOSAIC VIRUS REFINED TO 1.4 A RESOLUTION USING NON-
4oq9.pdb	q	H	-2.09192	-10.4919	SATELLITE TOBACCO MOSAIC VIRUS REFINED TO 1.4 A RESOLUTION USING NON-
4oq9.pdb	q	K	-2.09192	-10.4828	SATELLITE TOBACCO MOSAIC VIRUS REFINED TO 1.4 A RESOLUTION USING NON-
4oq9.pdb	q	J	-2.09192	-10.4645	SATELLITE TOBACCO MOSAIC VIRUS REFINED TO 1.4 A RESOLUTION USING NON-
4oq9.pdb	q	M	-2.09192	-7.88874	SATELLITE TOBACCO MOSAIC VIRUS REFINED TO 1.4 A RESOLUTION USING NON-
4oq9.pdb	q	L	-2.09192	-10.4737	SATELLITE TOBACCO MOSAIC VIRUS REFINED TO 1.4 A RESOLUTION USING NON-
4oq9.pdb	q	O	-2.09192	-10.5008	SATELLITE TOBACCO MOSAIC VIRUS REFINED TO 1.4 A RESOLUTION USING NON-
4oq9.pdb	q	N	-2.09192	-10.4737	SATELLITE TOBACCO MOSAIC VIRUS REFINED TO 1.4 A RESOLUTION USING NON-
4oq9.pdb	p	A	-2.09192	-10.4737	SATELLITE TOBACCO MOSAIC VIRUS REFINED TO 1.4 A RESOLUTION USING NON-
4oq9.pdb	p	C	-2.09192	-10.4828	SATELLITE TOBACCO MOSAIC VIRUS REFINED TO 1.4 A RESOLUTION USING NON-
4oq9.pdb	p	B	-2.09192	-10.4737	SATELLITE TOBACCO MOSAIC VIRUS REFINED TO 1.4 A RESOLUTION USING NON-
4oq9.pdb	p	E	-2.09192	-10.4919	SATELLITE TOBACCO MOSAIC VIRUS REFINED TO 1.4 A RESOLUTION USING NON-
4oq9.pdb	p	D	-2.09192	-10.5008	SATELLITE TOBACCO MOSAIC VIRUS REFINED TO 1.4 A RESOLUTION USING NON-
4oq9.pdb	p	G	-2.09192	-10.4828	SATELLITE TOBACCO MOSAIC VIRUS REFINED TO 1.4 A RESOLUTION USING NON-
4oq9.pdb	p	F	-2.09192	-10.4828	SATELLITE TOBACCO MOSAIC VIRUS REFINED TO 1.4 A RESOLUTION USING NON-
4oq9.pdb	p	I	-2.09192	-10.4919	SATELLITE TOBACCO MOSAIC VIRUS REFINED TO 1.4 A RESOLUTION USING NON-
4oq9.pdb	p	H	-2.09192	-10.4919	SATELLITE TOBACCO MOSAIC VIRUS REFINED TO 1.4 A RESOLUTION USING NON-
4oq9.pdb	p	K	-2.09192	-10.4828	SATELLITE TOBACCO MOSAIC VIRUS REFINED TO 1.4 A RESOLUTION USING NON-
4oq9.pdb	p	J	-2.09192	-10.4645	SATELLITE TOBACCO MOSAIC VIRUS REFINED TO 1.4 A RESOLUTION USING NON-
4oq9.pdb	p	M	-2.09192	-10.4737	SATELLITE TOBACCO MOSAIC VIRUS REFINED TO 1.4 A RESOLUTION USING NON-
4oq9.pdb	p	L	-2.09192	-7.88874	SATELLITE TOBACCO MOSAIC VIRUS REFINED TO 1.4 A RESOLUTION USING NON-
4oq9.pdb	p	O	-2.09192	-10.5008	SATELLITE TOBACCO MOSAIC VIRUS REFINED TO 1.4 A RESOLUTION USING NON-
4oq9.pdb	p	N	-2.09192	-10.4737	SATELLITE TOBACCO MOSAIC VIRUS REFINED TO 1.4 A RESOLUTION USING NON-
4oq9.pdb	s	A	-2.09192	-9.47371	SATELLITE TOBACCO MOSAIC VIRUS REFINED TO 1.4 A RESOLUTION USING NON-
4oq9.pdb	s	C	-2.09192	-10.4828	SATELLITE TOBACCO MOSAIC VIRUS REFINED TO 1.4 A RESOLUTION USING NON-
4oq9.pdb	s	B	-2.09192	-10.4737	SATELLITE TOBACCO MOSAIC VIRUS REFINED TO 1.4 A RESOLUTION USING NON-
4oq9.pdb	s	E	-2.09192	-10.4919	SATELLITE TOBACCO MOSAIC VIRUS REFINED TO 1.4 A RESOLUTION USING NON-
4oq9.pdb	s	D	-2.09192	-10.5008	SATELLITE TOBACCO MOSAIC VIRUS REFINED TO 1.4 A RESOLUTION USING NON-
4oq9.pdb	s	G	-2.09192	-10.4828	SATELLITE TOBACCO MOSAIC VIRUS REFINED TO 1.4 A RESOLUTION USING NON-
4oq9.pdb	s	F	-2.09192	-10.4828	SATELLITE TOBACCO MOSAIC VIRUS REFINED TO 1.4 A RESOLUTION USING NON-
4oq9.pdb	s	I	-2.09192	-10.4919	SATELLITE TOBACCO MOSAIC VIRUS REFINED TO 1.4 A RESOLUTION USING NON-
4oq9.pdb	s	H	-2.09192	-10.4919	SATELLITE TOBACCO MOSAIC VIRUS REFINED TO 1.4 A RESOLUTION USING NON-
4oq9.pdb	s	K	-2.09192	-10.4828	SATELLITE TOBACCO MOSAIC VIRUS REFINED TO 1.4 A RESOLUTION USING NON-
4oq9.pdb	s	J	-2.09192	-7.87958	SATELLITE TOBACCO MOSAIC VIRUS REFINED TO 1.4 A RESOLUTION USING NON-
4oq9.pdb	s	M	-2.09192	-10.4737	SATELLITE TOBACCO MOSAIC VIRUS REFINED TO 1.4 A RESOLUTION USING NON-
4oq9.pdb	s	L	-2.09192	-10.4737	SATELLITE TOBACCO MOSAIC VIRUS REFINED TO 1.4 A RESOLUTION USING NON-
4oq9.pdb	s	O	-2.09192	-7.91588	SATELLITE TOBACCO MOSAIC VIRUS REFINED TO 1.4 A RESOLUTION USING NON-
4oq9.pdb	s	N	-2.09192	-10.4737	SATELLITE TOBACCO MOSAIC VIRUS REFINED TO 1.4 A RESOLUTION USING NON-
4oq9.pdb	r	A	-2.09192	-8.15178	SATELLITE TOBACCO MOSAIC VIRUS REFINED TO 1.4 A RESOLUTION USING NON-
4oq9.pdb	r	C	-2.09192	-10.4828	SATELLITE TOBACCO MOSAIC VIRUS REFINED TO 1.4 A RESOLUTION USING NON-
4oq9.pdb	r	B	-2.09192	-10.4737	SATELLITE TOBACCO MOSAIC VIRUS REFINED TO 1.4 A RESOLUTION USING NON-
4oq9.pdb	r	E	-2.09192	-10.4919	SATELLITE TOBACCO MOSAIC VIRUS REFINED TO 1.4 A RESOLUTION USING NON-
4oq9.pdb	r	D	-2.09192	-10.5008	SATELLITE TOBACCO MOSAIC VIRUS REFINED TO 1.4 A RESOLUTION USING NON-
4oq9.pdb	r	G	-2.09192	-10.4828	SATELLITE TOBACCO MOSAIC VIRUS REFINED TO 1.4 A RESOLUTION USING NON-
4oq9.pdb	r	F	-2.09192	-10.4828	SATELLITE TOBACCO MOSAIC VIRUS REFINED TO 1.4 A RESOLUTION USING NON-
4oq9.pdb	r	I	-2.09192	-10.4919	SATELLITE TOBACCO MOSAIC VIRUS REFINED TO 1.4 A RESOLUTION USING NON-
4oq9.pdb	r	H	-2.09192	-10.4919	SATELLITE TOBACCO MOSAIC VIRUS REFINED TO 1.4 A RESOLUTION USING NON-
4oq9.pdb	r	K	-2.09192	-10.4828	SATELLITE TOBACCO MOSAIC VIRUS REFINED TO 1.4 A RESOLUTION USING NON-
4oq9.pdb	r	J	-2.09192	-10.4645	SATELLITE TOBACCO MOSAIC VIRUS REFINED TO 1.4 A RESOLUTION USING NON-
4oq9.pdb	r	M	-2.09192	-10.4737	SATELLITE TOBACCO MOSAIC VIRUS REFINED TO 1.4 A RESOLUTION USING NON-
4oq9.pdb	r	L	-2.09192	-10.4737	SATELLITE TOBACCO MOSAIC VIRUS REFINED TO 1.4 A RESOLUTION USING NON-
4oq9.pdb	r	O	-2.09192	-10.5008	SATELLITE TOBACCO MOSAIC VIRUS REFINED TO 1.4 A RESOLUTION USING NON-
4oq9.pdb	r	N	-2.09192	-7.88874	SATELLITE TOBACCO MOSAIC VIRUS REFINED TO 1.4 A RESOLUTION USING NON-
4oq9.pdb	u	A	1.58496	-7.30378	SATELLITE TOBACCO MOSAIC VIRUS REFINED TO 1.4 A RESOLUTION USING NON-
4oq9.pdb	u	C	1.58496	-7.31288	SATELLITE TOBACCO MOSAIC VIRUS REFINED TO 1.4 A RESOLUTION USING NON-
4oq9.pdb	u	B	1.58496	-4.98185	SATELLITE TOBACCO MOSAIC VIRUS REFINED TO 1.4 A RESOLUTION USING NON-
4oq9.pdb	u	E	1.58496	-7.32193	SATELLITE TOBACCO MOSAIC VIRUS REFINED TO 1.4 A RESOLUTION USING NON-
4oq9.pdb	u	D	1.58496	-7.33092	SATELLITE TOBACCO MOSAIC VIRUS REFINED TO 1.4 A RESOLUTION USING NON-
4oq9.pdb	u	G	1.58496	-7.31288	SATELLITE TOBACCO MOSAIC VIRUS REFINED TO 1.4 A RESOLUTION USING NON-
4oq9.pdb	u	F	1.58496	-7.31288	SATELLITE TOBACCO MOSAIC VIRUS REFINED TO 1.4 A RESOLUTION USING NON-
4oq9.pdb	u	I	1.58496	-7.32193	SATELLITE TOBACCO MOSAIC VIRUS REFINED TO 1.4 A RESOLUTION USING NON-
4oq9.pdb	u	H	1.58496	-7.32193	SATELLITE TOBACCO MOSAIC VIRUS REFINED TO 1.4 A RESOLUTION USING NON-
4oq9.pdb	u	K	1.58496	-7.31288	SATELLITE TOBACCO MOSAIC VIRUS REFINED TO 1.4 A RESOLUTION USING NON-
4oq9.pdb	u	J	1.58496	-7.29462	SATELLITE TOBACCO MOSAIC VIRUS REFINED TO 1.4 A RESOLUTION USING NON-
4oq9.pdb	u	M	1.58496	-7.30378	SATELLITE TOBACCO MOSAIC VIRUS REFINED TO 1.4 A RESOLUTION USING NON-
4oq9.pdb	u	L	1.58496	-7.30378	SATELLITE TOBACCO MOSAIC VIRUS REFINED TO 1.4 A RESOLUTION USING NON-
4oq9.pdb	u	O	1.58496	-7.33092	SATELLITE TOBACCO MOSAIC VIRUS REFINED TO 1.4 A RESOLUTION USING NON-
4oq9.pdb	u	N	1.58496	-7.30378	SATELLITE TOBACCO MOSAIC VIRUS REFINED TO 1.4 A RESOLUTION USING NON-
4oq9.pdb	t	A	1.58496	-5.30378	SATELLITE TOBACCO MOSAIC VIRUS REFINED TO 1.4 A RESOLUTION USING NON-
4oq9.pdb	t	C	1.58496	-7.31288	SATELLITE TOBACCO MOSAIC VIRUS REFINED TO 1.4 A RESOLUTION USING NON-
4oq9.pdb	t	B	1.58496	-7.30378	SATELLITE TOBACCO MOSAIC VIRUS REFINED TO 1.4 A RESOLUTION USING NON-
4oq9.pdb	t	E	1.58496	-7.32193	SATELLITE TOBACCO MOSAIC VIRUS REFINED TO 1.4 A RESOLUTION USING NON-
4oq9.pdb	t	D	1.58496	-7.33092	SATELLITE TOBACCO MOSAIC VIRUS REFINED TO 1.4 A RESOLUTION USING NON-
4oq9.pdb	t	G	1.58496	-7.31288	SATELLITE TOBACCO MOSAIC VIRUS REFINED TO 1.4 A RESOLUTION USING NON-
4oq9.pdb	t	F	1.58496	-7.31288	SATELLITE TOBACCO MOSAIC VIRUS REFINED TO 1.4 A RESOLUTION USING NON-
4oq9.pdb	t	I	1.58496	-7.32193	SATELLITE TOBACCO MOSAIC VIRUS REFINED TO 1.4 A RESOLUTION USING NON-
4oq9.pdb	t	H	1.58496	-7.32193	SATELLITE TOBACCO MOSAIC VIRUS REFINED TO 1.4 A RESOLUTION USING NON-
4oq9.pdb	t	K	1.58496	-7.31288	SATELLITE TOBACCO MOSAIC VIRUS REFINED TO 1.4 A RESOLUTION USING NON-
4oq9.pdb	t	J	1.58496	-7.29462	SATELLITE TOBACCO MOSAIC VIRUS REFINED TO 1.4 A RESOLUTION USING NON-
4oq9.pdb	t	M	1.58496	-7.30378	SATELLITE TOBACCO MOSAIC VIRUS REFINED TO 1.4 A RESOLUTION USING NON-
4oq9.pdb	t	L	1.58496	-7.30378	SATELLITE TOBACCO MOSAIC VIRUS REFINED TO 1.4 A RESOLUTION USING NON-
4oq9.pdb	t	O	1.58496	-5.74595	SATELLITE TOBACCO MOSAIC VIRUS REFINED TO 1.4 A RESOLUTION USING NON-
4oq9.pdb	t	N	1.58496	-7.30378	SATELLITE TOBACCO MOSAIC VIRUS REFINED TO 1.4 A RESOLUTION USING NON-
4oq9.pdb	w	A	1.58496	-7.30378	SATELLITE TOBACCO MOSAIC VIRUS REFINED TO 1.4 A RESOLUTION USING NON-
4oq9.pdb	w	C	1.58496	-7.31288	SATELLITE TOBACCO MOSAIC VIRUS REFINED TO 1.4 A RESOLUTION USING NON-
4oq9.pdb	w	B	1.58496	-7.30378	SATELLITE TOBACCO MOSAIC VIRUS REFINED TO 1.4 A RESOLUTION USING NON-
4oq9.pdb	w	E	1.58496	-7.32193	SATELLITE TOBACCO MOSAIC VIRUS REFINED TO 1.4 A RESOLUTION USING NON-
4oq9.pdb	w	D	1.58496	-5.00899	SATELLITE TOBACCO MOSAIC VIRUS REFINED TO 1.4 A RESOLUTION USING NON-
4oq9.pdb	w	G	1.58496	-7.31288	SATELLITE TOBACCO MOSAIC VIRUS REFINED TO 1.4 A RESOLUTION USING NON-
4oq9.pdb	w	F	1.58496	-7.31288	SATELLITE TOBACCO MOSAIC VIRUS REFINED TO 1.4 A RESOLUTION USING NON-
4oq9.pdb	w	I	1.58496	-7.32193	SATELLITE TOBACCO MOSAIC VIRUS REFINED TO 1.4 A RESOLUTION USING NON-
4oq9.pdb	w	H	1.58496	-7.32193	SATELLITE TOBACCO MOSAIC VIRUS REFINED TO 1.4 A RESOLUTION USING NON-
4oq9.pdb	w	K	1.58496	-7.31288	SATELLITE TOBACCO MOSAIC VIRUS REFINED TO 1.4 A RESOLUTION USING NON-
4oq9.pdb	w	J	1.58496	-7.29462	SATELLITE TOBACCO MOSAIC VIRUS REFINED TO 1.4 A RESOLUTION USING NON-
4oq9.pdb	w	M	1.58496	-7.30378	SATELLITE TOBACCO MOSAIC VIRUS REFINED TO 1.4 A RESOLUTION USING NON-
4oq9.pdb	w	L	1.58496	-7.30378	SATELLITE TOBACCO MOSAIC VIRUS REFINED TO 1.4 A RESOLUTION USING NON-
4oq9.pdb	w	O	1.58496	-7.33092	SATELLITE TOBACCO MOSAIC VIRUS REFINED TO 1.4 A RESOLUTION USING NON-
4oq9.pdb	w	N	1.58496	-7.30378	SATELLITE TOBACCO MOSAIC VIRUS REFINED TO 1.4 A RESOLUTION USING NON-
4oq9.pdb	v	A	1.58496	-7.30378	SATELLITE TOBACCO MOSAIC VIRUS REFINED TO 1.4 A RESOLUTION USING NON-
4oq9.pdb	v	C	1.58496	-4.99095	SATELLITE TOBACCO MOSAIC VIRUS REFINED TO 1.4 A RESOLUTION USING NON-
4oq9.pdb	v	B	1.58496	-7.30378	SATELLITE TOBACCO MOSAIC VIRUS REFINED TO 1.4 A RESOLUTION USING NON-
4oq9.pdb	v	E	1.58496	-7.32193	SATELLITE TOBACCO MOSAIC VIRUS REFINED TO 1.4 A RESOLUTION USING NON-
4oq9.pdb	v	D	1.58496	-7.33092	SATELLITE TOBACCO MOSAIC VIRUS REFINED TO 1.4 A RESOLUTION USING NON-
4oq9.pdb	v	G	1.58496	-7.31288	SATELLITE TOBACCO MOSAIC VIRUS REFINED TO 1.4 A RESOLUTION USING NON-
4oq9.pdb	v	F	1.58496	-7.31288	SATELLITE TOBACCO MOSAIC VIRUS REFINED TO 1.4 A RESOLUTION USING NON-
4oq9.pdb	v	I	1.58496	-7.32193	SATELLITE TOBACCO MOSAIC VIRUS REFINED TO 1.4 A RESOLUTION USING NON-
4oq9.pdb	v	H	1.58496	-7.32193	SATELLITE TOBACCO MOSAIC VIRUS REFINED TO 1.4 A RESOLUTION USING NON-
4oq9.pdb	v	K	1.58496	-7.31288	SATELLITE TOBACCO MOSAIC VIRUS REFINED TO 1.4 A RESOLUTION USING NON-
4oq9.pdb	v	J	1.58496	-7.29462	SATELLITE TOBACCO MOSAIC VIRUS REFINED TO 1.4 A RESOLUTION USING NON-
4oq9.pdb	v	M	1.58496	-7.30378	SATELLITE TOBACCO MOSAIC VIRUS REFINED TO 1.4 A RESOLUTION USING NON-
4oq9.pdb	v	L	1.58496	-7.30378	SATELLITE TOBACCO MOSAIC VIRUS REFINED TO 1.4 A RESOLUTION USING NON-
4oq9.pdb	v	O	1.58496	-7.33092	SATELLITE TOBACCO MOSAIC VIRUS REFINED TO 1.4 A RESOLUTION USING NON-
4oq9.pdb	v	N	1.58496	-7.30378	SATELLITE TOBACCO MOSAIC VIRUS REFINED TO 1.4 A RESOLUTION USING NON-
4oq9.pdb	y	A	1.58496	-7.30378	SATELLITE TOBACCO MOSAIC VIRUS REFINED TO 1.4 A RESOLUTION USING NON-
4oq9.pdb	y	C	1.58496	-7.31288	SATELLITE TOBACCO MOSAIC VIRUS REFINED TO 1.4 A RESOLUTION USING NON-
4oq9.pdb	y	B	1.58496	-7.30378	SATELLITE TOBACCO MOSAIC VIRUS REFINED TO 1.4 A RESOLUTION USING NON-
4oq9.pdb	y	E	1.58496	-6.32193	SATELLITE TOBACCO MOSAIC VIRUS REFINED TO 1.4 A RESOLUTION USING NON-
4oq9.pdb	y	D	1.58496	-7.33092	SATELLITE TOBACCO MOSAIC VIRUS REFINED TO 1.4 A RESOLUTION USING NON-
4oq9.pdb	y	G	1.58496	-7.31288	SATELLITE TOBACCO MOSAIC VIRUS REFINED TO 1.4 A RESOLUTION USING NON-
4oq9.pdb	y	F	1.58496	-4.99095	SATELLITE TOBACCO MOSAIC VIRUS REFINED TO 1.4 A RESOLUTION USING NON-
4oq9.pdb	y	I	1.58496	-7.32193	SATELLITE TOBACCO MOSAIC VIRUS REFINED TO 1.4 A RESOLUTION USING NON-
4oq9.pdb	y	H	1.58496	-7.32193	SATELLITE TOBACCO MOSAIC VIRUS REFINED TO 1.4 A RESOLUTION USING NON-
4oq9.pdb	y	K	1.58496	-7.31288	SATELLITE TOBACCO MOSAIC VIRUS REFINED TO 1.4 A RESOLUTION USING NON-
4oq9.pdb	y	J	1.58496	-7.29462	SATELLITE TOBACCO MOSAIC VIRUS REFINED TO 1.4 A RESOLUTION USING NON-
4oq9.pdb	y	M	1.58496	-7.30378	SATELLITE TOBACCO MOSAIC VIRUS REFINED TO 1.4 A RESOLUTION USING NON-
4oq9.pdb	y	L	1.58496	-7.30378	SATELLITE TOBACCO MOSAIC VIRUS REFINED TO 1.4 A RESOLUTION USING NON-
4oq9.pdb	y	O	1.58496	-7.33092	SATELLITE TOBACCO MOSAIC VIRUS REFINED TO 1.4 A RESOLUTION USING NON-
4oq9.pdb	y	N	1.58496	-7.30378	SATELLITE TOBACCO MOSAIC VIRUS REFINED TO 1.4 A RESOLUTION USING NON-
4oq9.pdb	x	A	1.58496	-7.30378	SATELLITE TOBACCO MOSAIC VIRUS REFINED TO 1.4 A RESOLUTION USING NON-
4oq9.pdb	x	C	1.58496	-7.31288	SATELLITE TOBACCO MOSAIC VIRUS REFINED TO 1.4 A RESOLUTION USING NON-
4oq9.pdb	x	B	1.58496	-7.30378	SATELLITE TOBACCO MOSAIC VIRUS REFINED TO 1.4 A RESOLUTION USING NON-
4oq9.pdb	x	E	1.58496	-5	SATELLITE TOBACCO MOSAIC VIRUS REFINED TO 1.4 A RESOLUTION USING NON-
4oq9.pdb	x	D	1.58496	-7.33092	SATELLITE TOBACCO MOSAIC VIRUS REFINED TO 1.4 A RESOLUTION USING NON-
4oq9.pdb	x	G	1.58496	-7.31288	SATELLITE TOBACCO MOSAIC VIRUS REFINED TO 1.4 A RESOLUTION USING NON-
4oq9.pdb	x	F	1.58496	-6.31288	SATELLITE TOBACCO MOSAIC VIRUS REFINED TO 1.4 A RESOLUTION USING NON-
4oq9.pdb	x	I	1.58496	-7.32193	SATELLITE TOBACCO MOSAIC VIRUS REFINED TO 1.4 A RESOLUTION USING NON-
4oq9.pdb	x	H	1.58496	-7.32193	SATELLITE TOBACCO MOSAIC VIRUS REFINED TO 1.4 A RESOLUTION USING NON-
4oq9.pdb	x	K	1.58496	-7.31288	SATELLITE TOBACCO MOSAIC VIRUS REFINED TO 1.4 A RESOLUTION USING NON-
4oq9.pdb	x	J	1.58496	-7.29462	SATELLITE TOBACCO MOSAIC VIRUS REFINED TO 1.4 A RESOLUTION USING NON-
4oq9.pdb	x	M	1.58496	-7.30378	SATELLITE TOBACCO MOSAIC VIRUS REFINED TO 1.4 A RESOLUTION USING NON-
4oq9.pdb	x	L	1.58496	-7.30378	SATELLITE TOBACCO MOSAIC VIRUS REFINED TO 1.4 A RESOLUTION USING NON-
4oq9.pdb	x	O	1.58496	-7.33092	SATELLITE TOBACCO MOSAIC VIRUS REFINED TO 1.4 A RESOLUTION USING NON-
4oq9.pdb	x	N	1.58496	-7.30378	SATELLITE TOBACCO MOSAIC VIRUS REFINED TO 1.4 A RESOLUTION USING NON-
4oq9.pdb	z	A	1.58496	-7.30378	SATELLITE TOBACCO MOSAIC VIRUS REFINED TO 1.4 A RESOLUTION USING NON-
4oq9.pdb	z	C	1.58496	-7.31288	SATELLITE TOBACCO MOSAIC VIRUS REFINED TO 1.4 A RESOLUTION USING NON-
4oq9.pdb	z	B	1.58496	-7.30378	SATELLITE TOBACCO MOSAIC VIRUS REFINED TO 1.4 A RESOLUTION USING NON-
4oq9.pdb	z	E	1.58496	-7.32193	SATELLITE TOBACCO MOSAIC VIRUS REFINED TO 1.4 A RESOLUTION USING NON-
4oq9.pdb	z	D	1.58496	-7.33092	SATELLITE TOBACCO MOSAIC VIRUS REFINED TO 1.4 A RESOLUTION USING NON-
4oq9.pdb	z	G	1.58496	-4.99095	SATELLITE TOBACCO MOSAIC VIRUS REFINED TO 1.4 A RESOLUTION USING NON-
4oq9.pdb	z	F	1.58496	-7.31288	SATELLITE TOBACCO MOSAIC VIRUS REFINED TO 1.4 A RESOLUTION USING NON-
4oq9.pdb	z	I	1.58496	-7.32193	SATELLITE TOBACCO MOSAIC VIRUS REFINED TO 1.4 A RESOLUTION USING NON-
4oq9.pdb	z	H	1.58496	-7.32193	SATELLITE TOBACCO MOSAIC VIRUS REFINED TO 1.4 A RESOLUTION USING NON-
4oq9.pdb	z	K	1.58496	-7.31288	SATELLITE TOBACCO MOSAIC VIRUS REFINED TO 1.4 A RESOLUTION USING NON-
4oq9.pdb	z	J	1.58496	-7.29462	SATELLITE TOBACCO MOSAIC VIRUS REFINED TO 1.4 A RESOLUTION USING NON-
4oq9.pdb	z	M	1.58496	-7.30378	SATELLITE TOBACCO MOSAIC VIRUS REFINED TO 1.4 A RESOLUTION USING NON-
4oq9.pdb	z	L	1.58496	-7.30378	SATELLITE TOBACCO MOSAIC VIRUS REFINED TO 1.4 A RESOLUTION USING NON-
4oq9.pdb	z	O	1.58496	-7.33092	SATELLITE TOBACCO MOSAIC VIRUS REFINED TO 1.4 A RESOLUTION USING NON-
4oq9.pdb	z	N	1.58496	-7.30378	SATELLITE TOBACCO MOSAIC VIRUS REFINED TO 1.4 A RESOLUTION USING NON-
4pei.pdb	X	A	0.321928	-9.45943	DBR1 IN COMPLEX WITH SYNTHETIC BRANCHED RNA ANALOG
4pei.pdb	X	C	0.321928	-7.1334	DBR1 IN COMPLEX WITH SYNTHETIC BRANCHED RNA ANALOG
4pei.pdb	X	B	0.321928	-9.45943	DBR1 IN COMPLEX WITH SYNTHETIC BRANCHED RNA ANALOG
4pei.pdb	X	E	0.321928	-9.45533	DBR1 IN COMPLEX WITH SYNTHETIC BRANCHED RNA ANALOG
4pei.pdb	X	D	0.321928	-9.45533	DBR1 IN COMPLEX WITH SYNTHETIC BRANCHED RNA ANALOG
4pei.pdb	Z	A	1.58496	-8.45943	DBR1 IN COMPLEX WITH SYNTHETIC BRANCHED RNA ANALOG
4pei.pdb	Z	C	1.58496	-8.45533	DBR1 IN COMPLEX WITH SYNTHETIC BRANCHED RNA ANALOG
4pei.pdb	Z	B	1.58496	-8.45943	DBR1 IN COMPLEX WITH SYNTHETIC BRANCHED RNA ANALOG
4pei.pdb	Z	E	1.58496	-6.1334	DBR1 IN COMPLEX WITH SYNTHETIC BRANCHED RNA ANALOG
4pei.pdb	Z	D	1.58496	-8.45533	DBR1 IN COMPLEX WITH SYNTHETIC BRANCHED RNA ANALOG
4pei.pdb	W	A	1.58496	-8.45943	DBR1 IN COMPLEX WITH SYNTHETIC BRANCHED RNA ANALOG
4pei.pdb	W	C	1.58496	-8.45533	DBR1 IN COMPLEX WITH SYNTHETIC BRANCHED RNA ANALOG
4pei.pdb	W	B	1.58496	-6.45943	DBR1 IN COMPLEX WITH SYNTHETIC BRANCHED RNA ANALOG
4pei.pdb	W	E	1.58496	-8.45533	DBR1 IN COMPLEX WITH SYNTHETIC BRANCHED RNA ANALOG
4pei.pdb	W	D	1.58496	-8.45533	DBR1 IN COMPLEX WITH SYNTHETIC BRANCHED RNA ANALOG
4pei.pdb	V	A	1.58496	-6.87447	DBR1 IN COMPLEX WITH SYNTHETIC BRANCHED RNA ANALOG
4pei.pdb	V	C	1.58496	-8.45533	DBR1 IN COMPLEX WITH SYNTHETIC BRANCHED RNA ANALOG
4pei.pdb	V	B	1.58496	-8.45943	DBR1 IN COMPLEX WITH SYNTHETIC BRANCHED RNA ANALOG
4pei.pdb	V	E	1.58496	-8.45533	DBR1 IN COMPLEX WITH SYNTHETIC BRANCHED RNA ANALOG
4pei.pdb	V	D	1.58496	-8.45533	DBR1 IN COMPLEX WITH SYNTHETIC BRANCHED RNA ANALOG
4qg3.pdb	B	A	-5.18971	-9.50541	CRYSTAL STRUCTURE OF MUTANT RIBOSOMAL PROTEIN G219V TTHL1 IN COMPLEX
4qik.pdb	C	A	-3.0458	-10.2336	CRYSTAL STRUCTURE OF THE ROQ DOMAIN OF HUMAN ROQUIN IN COMPLEX WITH
4qik.pdb	C	B	-3.0458	-10.2046	CRYSTAL STRUCTURE OF THE ROQ DOMAIN OF HUMAN ROQUIN IN COMPLEX WITH
4qik.pdb	D	A	-3.04564	-11.3211	CRYSTAL STRUCTURE OF THE ROQ DOMAIN OF HUMAN ROQUIN IN COMPLEX WITH
4qik.pdb	D	B	-3.04564	-10.292	CRYSTAL STRUCTURE OF THE ROQ DOMAIN OF HUMAN ROQUIN IN COMPLEX WITH
4qm6.pdb	C	A	-0.847997	-6.45943	STRUCTURE OF BACTERIAL POLYNUCLEOTIDE KINASE BOUND TO GTP AND RNA
4qm6.pdb	C	B	-0.847997	-9.0607	STRUCTURE OF BACTERIAL POLYNUCLEOTIDE KINASE BOUND TO GTP AND RNA
4qm6.pdb	D	A	-0.847997	-9.04439	STRUCTURE OF BACTERIAL POLYNUCLEOTIDE KINASE BOUND TO GTP AND RNA
4qm6.pdb	D	B	-0.847997	-6.47573	STRUCTURE OF BACTERIAL POLYNUCLEOTIDE KINASE BOUND TO GTP AND RNA
4qpx.pdb	P	A	-1.46949	-7.72889	NV POLYMERASE POST-INCORPORATION-LIKE COMPLEX
4qpx.pdb	T	A	-1.18442	-6.8809	NV POLYMERASE POST-INCORPORATION-LIKE COMPLEX
4qu6.pdb	B	A	0.321928	-7.70044	CRYSTAL STRUCTURE OF A G-RICH RNA SEQUENCE BINDING FACTOR 1 (GRSF1)
4qvc.pdb	G	A	0.321928	-6.90689	E.COLI HFQ IN COMPLEX WITH RNA AUS
4qvc.pdb	G	C	0.321928	-6.97728	E.COLI HFQ IN COMPLEX WITH RNA AUS
4qvc.pdb	G	B	0.321928	-6.90689	E.COLI HFQ IN COMPLEX WITH RNA AUS
4qvc.pdb	G	E	0.321928	-6.90689	E.COLI HFQ IN COMPLEX WITH RNA AUS
4qvc.pdb	G	D	0.321928	-5.32193	E.COLI HFQ IN COMPLEX WITH RNA AUS
4qvc.pdb	G	F	0.321928	-6.93074	E.COLI HFQ IN COMPLEX WITH RNA AUS
4qvd.pdb	H	A	-0.36257	-7.49185	E.COLI HFQ IN COMPLEX WITH RNA ADS
4qvd.pdb	H	C	-0.36257	-7.56224	E.COLI HFQ IN COMPLEX WITH RNA ADS
4qvd.pdb	H	B	-0.36257	-7.5157	E.COLI HFQ IN COMPLEX WITH RNA ADS
4qvd.pdb	H	E	-0.36257	-5.49185	E.COLI HFQ IN COMPLEX WITH RNA ADS
4qvd.pdb	H	D	-0.36257	-5.90689	E.COLI HFQ IN COMPLEX WITH RNA ADS
4qvd.pdb	H	F	-0.36257	-7.5157	E.COLI HFQ IN COMPLEX WITH RNA ADS
4qvi.pdb	B	A	-5.20668	-9.57057	CRYSTAL STRUCTURE OF MUTANT RIBOSOMAL PROTEIN M218L TTHL1 IN COMPLEX
4r3i.pdb	B	A	-2	-5.5502	THE CRYSTAL STRUCTURE OF AN RNA COMPLEX
4rcj.pdb	B	A	-2	-5.41504	CRYSTAL STRUCTURE OF YTHDF1 YTH DOMAIN IN COMPLEX WITH 5MER M6A RNA
4rwn.pdb	C	A	-3.04564	-8.36875	CRYSTAL STRUCTURE OF THE PRE-REACTIVE STATE OF PORCINE OAS1
4rwn.pdb	B	A	-3.04564	-8.73132	CRYSTAL STRUCTURE OF THE PRE-REACTIVE STATE OF PORCINE OAS1
4s2x.pdb	B	A	1.58496	-5.37504	STRUCTURE OF E. COLI RPPH BOUND TO RNA AND TWO MAGNESIUM IONS
4s3n.pdb	C	A	-3.04564	-8.50953	CRYSTAL STRUCTURE OF HUMAN OAS3 DOMAIN I IN COMPLEX WITH DSRNA
4s3n.pdb	B	A	-3.04564	-9.70217	CRYSTAL STRUCTURE OF HUMAN OAS3 DOMAIN I IN COMPLEX WITH DSRNA
4w5o.pdb	B	A	-3.36657	-8.89359	THE CRYSTAL STRUCTURE OF HUMAN ARGONAUTE2 BOUND TO A GUIDE AND TARGET
4w5o.pdb	D	A	-1.91254	-10.6457	THE CRYSTAL STRUCTURE OF HUMAN ARGONAUTE2 BOUND TO A GUIDE AND TARGET
4wan.pdb	H	A	-1.70782	-9.78463	CRYSTAL STRUCTURE OF MSL5 PROTEIN IN COMPLEX WITH RNA AT 1.8 A
4wan.pdb	H	C	-1.70782	-9.77314	CRYSTAL STRUCTURE OF MSL5 PROTEIN IN COMPLEX WITH RNA AT 1.8 A
4wan.pdb	H	E	-1.70782	-9.73809	CRYSTAL STRUCTURE OF MSL5 PROTEIN IN COMPLEX WITH RNA AT 1.8 A
4wan.pdb	H	G	-1.70782	-6.52007	CRYSTAL STRUCTURE OF MSL5 PROTEIN IN COMPLEX WITH RNA AT 1.8 A
4wan.pdb	B	A	-1.70782	-6.61471	CRYSTAL STRUCTURE OF MSL5 PROTEIN IN COMPLEX WITH RNA AT 1.8 A
4wan.pdb	B	C	-1.70782	-9.77314	CRYSTAL STRUCTURE OF MSL5 PROTEIN IN COMPLEX WITH RNA AT 1.8 A
4wan.pdb	B	E	-1.70782	-9.73809	CRYSTAL STRUCTURE OF MSL5 PROTEIN IN COMPLEX WITH RNA AT 1.8 A
4wan.pdb	B	G	-1.70782	-9.69	CRYSTAL STRUCTURE OF MSL5 PROTEIN IN COMPLEX WITH RNA AT 1.8 A
4wan.pdb	D	A	-1.91254	-9.97728	CRYSTAL STRUCTURE OF MSL5 PROTEIN IN COMPLEX WITH RNA AT 1.8 A
4wan.pdb	D	C	-1.91254	-6.96578	CRYSTAL STRUCTURE OF MSL5 PROTEIN IN COMPLEX WITH RNA AT 1.8 A
4wan.pdb	D	E	-1.91254	-9.93074	CRYSTAL STRUCTURE OF MSL5 PROTEIN IN COMPLEX WITH RNA AT 1.8 A
4wan.pdb	D	G	-1.91254	-9.88264	CRYSTAL STRUCTURE OF MSL5 PROTEIN IN COMPLEX WITH RNA AT 1.8 A
4wan.pdb	F	A	-1.91254	-9.97728	CRYSTAL STRUCTURE OF MSL5 PROTEIN IN COMPLEX WITH RNA AT 1.8 A
4wan.pdb	F	C	-1.91254	-9.96578	CRYSTAL STRUCTURE OF MSL5 PROTEIN IN COMPLEX WITH RNA AT 1.8 A
4wan.pdb	F	E	-1.91254	-6.93074	CRYSTAL STRUCTURE OF MSL5 PROTEIN IN COMPLEX WITH RNA AT 1.8 A
4wan.pdb	F	G	-1.91254	-9.88264	CRYSTAL STRUCTURE OF MSL5 PROTEIN IN COMPLEX WITH RNA AT 1.8 A
4wtl.pdb	P	A	1.58496	-7.54174	CRYSTAL STRUCTURE OF HCV NS5B GENOTYPE 2A JFH-1 ISOLATE WITH S15G E86Q
4wtl.pdb	T	A	0.321928	-6.80478	CRYSTAL STRUCTURE OF HCV NS5B GENOTYPE 2A JFH-1 ISOLATE WITH S15G E86Q
4xww.pdb	E	A	-1.18442	-11.42	CRYSTAL STRUCTURE OF RNASE J COMPLEXED WITH RNA
4xww.pdb	E	B	-1.18442	-6.66244	CRYSTAL STRUCTURE OF RNASE J COMPLEXED WITH RNA
4xww.pdb	D	A	-1.18442	-6.71952	CRYSTAL STRUCTURE OF RNASE J COMPLEXED WITH RNA
4xww.pdb	D	B	-1.18442	-11.4173	CRYSTAL STRUCTURE OF RNASE J COMPLEXED WITH RNA
4yoe.pdb	E	A	1.58496	-7.49985	STRUCTURE OF UP1 BOUND TO RNA 5'-AGU-3'
4z4d.pdb	B	A	-3.2864	-8.86174	HUMAN ARGONAUTE2 BOUND TO T1-G TARGET RNA
4z4d.pdb	D	A	-1.70782	-10.8806	HUMAN ARGONAUTE2 BOUND TO T1-G TARGET RNA
4z4e.pdb	B	A	-3.21057	-8.81738	HUMAN ARGONAUTE2 BOUND TO T1-U TARGET RNA
4z4e.pdb	D	A	-1.70782	-10.8699	HUMAN ARGONAUTE2 BOUND TO T1-U TARGET RNA
4zld.pdb	B	A	-2.85958	-7.2854	CRYSTAL STRUCTURE OF HUMAN ROQUIN-2 ROQ DOMAIN IN COMPLEX WITH ROQUIN
5bud.pdb	E	A	-0.830075	-10.611	CRYSTAL STRUCTURE OF CANDIDA ALBICANS RAI1 IN COMPLEX WITH PU5-MN2+
5bud.pdb	E	B	-0.830075	-7.01123	CRYSTAL STRUCTURE OF CANDIDA ALBICANS RAI1 IN COMPLEX WITH PU5-MN2+
5bud.pdb	D	A	-0.36257	-6.61102	CRYSTAL STRUCTURE OF CANDIDA ALBICANS RAI1 IN COMPLEX WITH PU5-MN2+
5bud.pdb	D	B	-0.36257	-10.1812	CRYSTAL STRUCTURE OF CANDIDA ALBICANS RAI1 IN COMPLEX WITH PU5-MN2+
5ccb.pdb	N	A	-5.14987	-14.4063	CRYSTAL STRUCTURE OF HUMAN M1A58 METHYLTRANSFERASE IN A COMPLEX WITH
5ccb.pdb	N	B	-5.14987	-10.4097	CRYSTAL STRUCTURE OF HUMAN M1A58 METHYLTRANSFERASE IN A COMPLEX WITH
5det.pdb	Q	A	-0.830075	-8.53916	X-RAY STRUCTURE OF HUMAN RBPMS IN COMPLEX WITH THE RNA
5det.pdb	Q	B	-0.830075	-6.98489	X-RAY STRUCTURE OF HUMAN RBPMS IN COMPLEX WITH THE RNA
5det.pdb	P	A	0.321928	-7.53916	X-RAY STRUCTURE OF HUMAN RBPMS IN COMPLEX WITH THE RNA
5det.pdb	P	B	0.321928	-7.56986	X-RAY STRUCTURE OF HUMAN RBPMS IN COMPLEX WITH THE RNA
5dno.pdb	B	A	-1.18442	-7.67948	CRYSTAL STRUCTURE OF MMI1 YTH DOMAIN COMPLEX WITH RNA
5do4.pdb	A	H	-2.922	-8.26303	THROMBIN-RNA APTAMER COMPLEX
5do4.pdb	A	L	-2.922	-8.58496	THROMBIN-RNA APTAMER COMPLEX
5eeu.pdb	W	A	-4.78644	-11.5348	RADIATION DAMAGE TO THE TRAP-RNA COMPLEX: DOSE (DWD) 1.31 MGY
5eeu.pdb	W	C	-4.78644	-11.5348	RADIATION DAMAGE TO THE TRAP-RNA COMPLEX: DOSE (DWD) 1.31 MGY
5eeu.pdb	W	B	-4.78644	-11.5137	RADIATION DAMAGE TO THE TRAP-RNA COMPLEX: DOSE (DWD) 1.31 MGY
5eeu.pdb	W	E	-4.78644	-11.5137	RADIATION DAMAGE TO THE TRAP-RNA COMPLEX: DOSE (DWD) 1.31 MGY
5eeu.pdb	W	D	-4.78644	-11.5348	RADIATION DAMAGE TO THE TRAP-RNA COMPLEX: DOSE (DWD) 1.31 MGY
5eeu.pdb	W	G	-4.78644	-11.5348	RADIATION DAMAGE TO THE TRAP-RNA COMPLEX: DOSE (DWD) 1.31 MGY
5eeu.pdb	W	F	-4.78644	-11.5555	RADIATION DAMAGE TO THE TRAP-RNA COMPLEX: DOSE (DWD) 1.31 MGY
5eeu.pdb	W	I	-4.78644	-11.5137	RADIATION DAMAGE TO THE TRAP-RNA COMPLEX: DOSE (DWD) 1.31 MGY
5eeu.pdb	W	H	-4.78644	-11.5137	RADIATION DAMAGE TO THE TRAP-RNA COMPLEX: DOSE (DWD) 1.31 MGY
5eeu.pdb	W	K	-4.78644	-11.5137	RADIATION DAMAGE TO THE TRAP-RNA COMPLEX: DOSE (DWD) 1.31 MGY
5eeu.pdb	W	J	-4.78644	-11.4924	RADIATION DAMAGE TO THE TRAP-RNA COMPLEX: DOSE (DWD) 1.31 MGY
5eeu.pdb	W	M	-4.78644	-11.5555	RADIATION DAMAGE TO THE TRAP-RNA COMPLEX: DOSE (DWD) 1.31 MGY
5eeu.pdb	W	L	-4.78644	-11.576	RADIATION DAMAGE TO THE TRAP-RNA COMPLEX: DOSE (DWD) 1.31 MGY
5eeu.pdb	W	O	-4.78644	-11.5555	RADIATION DAMAGE TO THE TRAP-RNA COMPLEX: DOSE (DWD) 1.31 MGY
5eeu.pdb	W	N	-4.78644	-11.5555	RADIATION DAMAGE TO THE TRAP-RNA COMPLEX: DOSE (DWD) 1.31 MGY
5eeu.pdb	W	Q	-4.78644	-11.5555	RADIATION DAMAGE TO THE TRAP-RNA COMPLEX: DOSE (DWD) 1.31 MGY
5eeu.pdb	W	P	-4.78644	-11.5555	RADIATION DAMAGE TO THE TRAP-RNA COMPLEX: DOSE (DWD) 1.31 MGY
5eeu.pdb	W	S	-4.78644	-11.5555	RADIATION DAMAGE TO THE TRAP-RNA COMPLEX: DOSE (DWD) 1.31 MGY
5eeu.pdb	W	R	-4.78644	-11.5555	RADIATION DAMAGE TO THE TRAP-RNA COMPLEX: DOSE (DWD) 1.31 MGY
5eeu.pdb	W	U	-4.78644	-10.5555	RADIATION DAMAGE TO THE TRAP-RNA COMPLEX: DOSE (DWD) 1.31 MGY
5eeu.pdb	W	T	-4.78644	-11.5555	RADIATION DAMAGE TO THE TRAP-RNA COMPLEX: DOSE (DWD) 1.31 MGY
5eeu.pdb	W	V	-4.78644	-11.5555	RADIATION DAMAGE TO THE TRAP-RNA COMPLEX: DOSE (DWD) 1.31 MGY
5eev.pdb	W	A	-4.78644	-11.5348	RADIATION DAMAGE TO THE TRAP-RNA COMPLEX: DOSE (DWD) 3.88 MGY
5eev.pdb	W	C	-4.78644	-11.5348	RADIATION DAMAGE TO THE TRAP-RNA COMPLEX: DOSE (DWD) 3.88 MGY
5eev.pdb	W	B	-4.78644	-11.5137	RADIATION DAMAGE TO THE TRAP-RNA COMPLEX: DOSE (DWD) 3.88 MGY
5eev.pdb	W	E	-4.78644	-11.5137	RADIATION DAMAGE TO THE TRAP-RNA COMPLEX: DOSE (DWD) 3.88 MGY
5eev.pdb	W	D	-4.78644	-11.5348	RADIATION DAMAGE TO THE TRAP-RNA COMPLEX: DOSE (DWD) 3.88 MGY
5eev.pdb	W	G	-4.78644	-11.5348	RADIATION DAMAGE TO THE TRAP-RNA COMPLEX: DOSE (DWD) 3.88 MGY
5eev.pdb	W	F	-4.78644	-11.5555	RADIATION DAMAGE TO THE TRAP-RNA COMPLEX: DOSE (DWD) 3.88 MGY
5eev.pdb	W	I	-4.78644	-11.5137	RADIATION DAMAGE TO THE TRAP-RNA COMPLEX: DOSE (DWD) 3.88 MGY
5eev.pdb	W	H	-4.78644	-11.5137	RADIATION DAMAGE TO THE TRAP-RNA COMPLEX: DOSE (DWD) 3.88 MGY
5eev.pdb	W	K	-4.78644	-11.5137	RADIATION DAMAGE TO THE TRAP-RNA COMPLEX: DOSE (DWD) 3.88 MGY
5eev.pdb	W	J	-4.78644	-11.4924	RADIATION DAMAGE TO THE TRAP-RNA COMPLEX: DOSE (DWD) 3.88 MGY
5eev.pdb	W	M	-4.78644	-11.5555	RADIATION DAMAGE TO THE TRAP-RNA COMPLEX: DOSE (DWD) 3.88 MGY
5eev.pdb	W	L	-4.78644	-11.576	RADIATION DAMAGE TO THE TRAP-RNA COMPLEX: DOSE (DWD) 3.88 MGY
5eev.pdb	W	O	-4.78644	-11.5555	RADIATION DAMAGE TO THE TRAP-RNA COMPLEX: DOSE (DWD) 3.88 MGY
5eev.pdb	W	N	-4.78644	-11.5555	RADIATION DAMAGE TO THE TRAP-RNA COMPLEX: DOSE (DWD) 3.88 MGY
5eev.pdb	W	Q	-4.78644	-11.5555	RADIATION DAMAGE TO THE TRAP-RNA COMPLEX: DOSE (DWD) 3.88 MGY
5eev.pdb	W	P	-4.78644	-11.5555	RADIATION DAMAGE TO THE TRAP-RNA COMPLEX: DOSE (DWD) 3.88 MGY
5eev.pdb	W	S	-4.78644	-11.5555	RADIATION DAMAGE TO THE TRAP-RNA COMPLEX: DOSE (DWD) 3.88 MGY
5eev.pdb	W	R	-4.78644	-11.5555	RADIATION DAMAGE TO THE TRAP-RNA COMPLEX: DOSE (DWD) 3.88 MGY
5eev.pdb	W	U	-4.78644	-10.5555	RADIATION DAMAGE TO THE TRAP-RNA COMPLEX: DOSE (DWD) 3.88 MGY
5eev.pdb	W	T	-4.78644	-11.5555	RADIATION DAMAGE TO THE TRAP-RNA COMPLEX: DOSE (DWD) 3.88 MGY
5eev.pdb	W	V	-4.78644	-11.5555	RADIATION DAMAGE TO THE TRAP-RNA COMPLEX: DOSE (DWD) 3.88 MGY
5eew.pdb	W	A	-4.78644	-11.5348	RADIATION DAMAGE TO THE TRAP-RNA COMPLEX: DOSE (DWD) 6.45 MGY
5eew.pdb	W	C	-4.78644	-11.5348	RADIATION DAMAGE TO THE TRAP-RNA COMPLEX: DOSE (DWD) 6.45 MGY
5eew.pdb	W	B	-4.78644	-11.5137	RADIATION DAMAGE TO THE TRAP-RNA COMPLEX: DOSE (DWD) 6.45 MGY
5eew.pdb	W	E	-4.78644	-11.5137	RADIATION DAMAGE TO THE TRAP-RNA COMPLEX: DOSE (DWD) 6.45 MGY
5eew.pdb	W	D	-4.78644	-11.5348	RADIATION DAMAGE TO THE TRAP-RNA COMPLEX: DOSE (DWD) 6.45 MGY
5eew.pdb	W	G	-4.78644	-11.5348	RADIATION DAMAGE TO THE TRAP-RNA COMPLEX: DOSE (DWD) 6.45 MGY
5eew.pdb	W	F	-4.78644	-11.5555	RADIATION DAMAGE TO THE TRAP-RNA COMPLEX: DOSE (DWD) 6.45 MGY
5eew.pdb	W	I	-4.78644	-11.5137	RADIATION DAMAGE TO THE TRAP-RNA COMPLEX: DOSE (DWD) 6.45 MGY
5eew.pdb	W	H	-4.78644	-11.5137	RADIATION DAMAGE TO THE TRAP-RNA COMPLEX: DOSE (DWD) 6.45 MGY
5eew.pdb	W	K	-4.78644	-11.5137	RADIATION DAMAGE TO THE TRAP-RNA COMPLEX: DOSE (DWD) 6.45 MGY
5eew.pdb	W	J	-4.78644	-11.4924	RADIATION DAMAGE TO THE TRAP-RNA COMPLEX: DOSE (DWD) 6.45 MGY
5eew.pdb	W	M	-4.78644	-11.5555	RADIATION DAMAGE TO THE TRAP-RNA COMPLEX: DOSE (DWD) 6.45 MGY
5eew.pdb	W	L	-4.78644	-11.576	RADIATION DAMAGE TO THE TRAP-RNA COMPLEX: DOSE (DWD) 6.45 MGY
5eew.pdb	W	O	-4.78644	-11.5555	RADIATION DAMAGE TO THE TRAP-RNA COMPLEX: DOSE (DWD) 6.45 MGY
5eew.pdb	W	N	-4.78644	-11.5555	RADIATION DAMAGE TO THE TRAP-RNA COMPLEX: DOSE (DWD) 6.45 MGY
5eew.pdb	W	Q	-4.78644	-11.5555	RADIATION DAMAGE TO THE TRAP-RNA COMPLEX: DOSE (DWD) 6.45 MGY
5eew.pdb	W	P	-4.78644	-11.5555	RADIATION DAMAGE TO THE TRAP-RNA COMPLEX: DOSE (DWD) 6.45 MGY
5eew.pdb	W	S	-4.78644	-11.5555	RADIATION DAMAGE TO THE TRAP-RNA COMPLEX: DOSE (DWD) 6.45 MGY
5eew.pdb	W	R	-4.78644	-11.5555	RADIATION DAMAGE TO THE TRAP-RNA COMPLEX: DOSE (DWD) 6.45 MGY
5eew.pdb	W	U	-4.78644	-10.5555	RADIATION DAMAGE TO THE TRAP-RNA COMPLEX: DOSE (DWD) 6.45 MGY
5eew.pdb	W	T	-4.78644	-11.5555	RADIATION DAMAGE TO THE TRAP-RNA COMPLEX: DOSE (DWD) 6.45 MGY
5eew.pdb	W	V	-4.78644	-11.5555	RADIATION DAMAGE TO THE TRAP-RNA COMPLEX: DOSE (DWD) 6.45 MGY
5eex.pdb	W	A	-4.78644	-11.5348	RADIATION DAMAGE TO THE TRAP-RNA COMPLEX: DOSE (DWD) 9.02 MGY
5eex.pdb	W	C	-4.78644	-11.5348	RADIATION DAMAGE TO THE TRAP-RNA COMPLEX: DOSE (DWD) 9.02 MGY
5eex.pdb	W	B	-4.78644	-11.5137	RADIATION DAMAGE TO THE TRAP-RNA COMPLEX: DOSE (DWD) 9.02 MGY
5eex.pdb	W	E	-4.78644	-11.5137	RADIATION DAMAGE TO THE TRAP-RNA COMPLEX: DOSE (DWD) 9.02 MGY
5eex.pdb	W	D	-4.78644	-11.5348	RADIATION DAMAGE TO THE TRAP-RNA COMPLEX: DOSE (DWD) 9.02 MGY
5eex.pdb	W	G	-4.78644	-11.5348	RADIATION DAMAGE TO THE TRAP-RNA COMPLEX: DOSE (DWD) 9.02 MGY
5eex.pdb	W	F	-4.78644	-11.5555	RADIATION DAMAGE TO THE TRAP-RNA COMPLEX: DOSE (DWD) 9.02 MGY
5eex.pdb	W	I	-4.78644	-11.5137	RADIATION DAMAGE TO THE TRAP-RNA COMPLEX: DOSE (DWD) 9.02 MGY
5eex.pdb	W	H	-4.78644	-11.5137	RADIATION DAMAGE TO THE TRAP-RNA COMPLEX: DOSE (DWD) 9.02 MGY
5eex.pdb	W	K	-4.78644	-11.5137	RADIATION DAMAGE TO THE TRAP-RNA COMPLEX: DOSE (DWD) 9.02 MGY
5eex.pdb	W	J	-4.78644	-11.4924	RADIATION DAMAGE TO THE TRAP-RNA COMPLEX: DOSE (DWD) 9.02 MGY
5eex.pdb	W	M	-4.78644	-11.5555	RADIATION DAMAGE TO THE TRAP-RNA COMPLEX: DOSE (DWD) 9.02 MGY
5eex.pdb	W	L	-4.78644	-11.576	RADIATION DAMAGE TO THE TRAP-RNA COMPLEX: DOSE (DWD) 9.02 MGY
5eex.pdb	W	O	-4.78644	-11.5555	RADIATION DAMAGE TO THE TRAP-RNA COMPLEX: DOSE (DWD) 9.02 MGY
5eex.pdb	W	N	-4.78644	-11.5555	RADIATION DAMAGE TO THE TRAP-RNA COMPLEX: DOSE (DWD) 9.02 MGY
5eex.pdb	W	Q	-4.78644	-11.5555	RADIATION DAMAGE TO THE TRAP-RNA COMPLEX: DOSE (DWD) 9.02 MGY
5eex.pdb	W	P	-4.78644	-11.5555	RADIATION DAMAGE TO THE TRAP-RNA COMPLEX: DOSE (DWD) 9.02 MGY
5eex.pdb	W	S	-4.78644	-11.5555	RADIATION DAMAGE TO THE TRAP-RNA COMPLEX: DOSE (DWD) 9.02 MGY
5eex.pdb	W	R	-4.78644	-11.5555	RADIATION DAMAGE TO THE TRAP-RNA COMPLEX: DOSE (DWD) 9.02 MGY
5eex.pdb	W	U	-4.78644	-10.5555	RADIATION DAMAGE TO THE TRAP-RNA COMPLEX: DOSE (DWD) 9.02 MGY
5eex.pdb	W	T	-4.78644	-11.5555	RADIATION DAMAGE TO THE TRAP-RNA COMPLEX: DOSE (DWD) 9.02 MGY
5eex.pdb	W	V	-4.78644	-11.5555	RADIATION DAMAGE TO THE TRAP-RNA COMPLEX: DOSE (DWD) 9.02 MGY
5eey.pdb	W	A	-4.78644	-11.5348	RADIATION DAMAGE TO THE TRAP-RNA COMPLEX: DOSE (DWD) 11.6 MGY
5eey.pdb	W	C	-4.78644	-11.5348	RADIATION DAMAGE TO THE TRAP-RNA COMPLEX: DOSE (DWD) 11.6 MGY
5eey.pdb	W	B	-4.78644	-11.5137	RADIATION DAMAGE TO THE TRAP-RNA COMPLEX: DOSE (DWD) 11.6 MGY
5eey.pdb	W	E	-4.78644	-11.5137	RADIATION DAMAGE TO THE TRAP-RNA COMPLEX: DOSE (DWD) 11.6 MGY
5eey.pdb	W	D	-4.78644	-11.5348	RADIATION DAMAGE TO THE TRAP-RNA COMPLEX: DOSE (DWD) 11.6 MGY
5eey.pdb	W	G	-4.78644	-11.5348	RADIATION DAMAGE TO THE TRAP-RNA COMPLEX: DOSE (DWD) 11.6 MGY
5eey.pdb	W	F	-4.78644	-11.5555	RADIATION DAMAGE TO THE TRAP-RNA COMPLEX: DOSE (DWD) 11.6 MGY
5eey.pdb	W	I	-4.78644	-11.5137	RADIATION DAMAGE TO THE TRAP-RNA COMPLEX: DOSE (DWD) 11.6 MGY
5eey.pdb	W	H	-4.78644	-11.5137	RADIATION DAMAGE TO THE TRAP-RNA COMPLEX: DOSE (DWD) 11.6 MGY
5eey.pdb	W	K	-4.78644	-11.5137	RADIATION DAMAGE TO THE TRAP-RNA COMPLEX: DOSE (DWD) 11.6 MGY
5eey.pdb	W	J	-4.78644	-11.4924	RADIATION DAMAGE TO THE TRAP-RNA COMPLEX: DOSE (DWD) 11.6 MGY
5eey.pdb	W	M	-4.78644	-11.5555	RADIATION DAMAGE TO THE TRAP-RNA COMPLEX: DOSE (DWD) 11.6 MGY
5eey.pdb	W	L	-4.78644	-11.576	RADIATION DAMAGE TO THE TRAP-RNA COMPLEX: DOSE (DWD) 11.6 MGY
5eey.pdb	W	O	-4.78644	-10.5555	RADIATION DAMAGE TO THE TRAP-RNA COMPLEX: DOSE (DWD) 11.6 MGY
5eey.pdb	W	N	-4.78644	-11.5555	RADIATION DAMAGE TO THE TRAP-RNA COMPLEX: DOSE (DWD) 11.6 MGY
5eey.pdb	W	Q	-4.78644	-11.5555	RADIATION DAMAGE TO THE TRAP-RNA COMPLEX: DOSE (DWD) 11.6 MGY
5eey.pdb	W	P	-4.78644	-11.5555	RADIATION DAMAGE TO THE TRAP-RNA COMPLEX: DOSE (DWD) 11.6 MGY
5eey.pdb	W	S	-4.78644	-11.5555	RADIATION DAMAGE TO THE TRAP-RNA COMPLEX: DOSE (DWD) 11.6 MGY
5eey.pdb	W	R	-4.78644	-11.5555	RADIATION DAMAGE TO THE TRAP-RNA COMPLEX: DOSE (DWD) 11.6 MGY
5eey.pdb	W	U	-4.78644	-10.5555	RADIATION DAMAGE TO THE TRAP-RNA COMPLEX: DOSE (DWD) 11.6 MGY
5eey.pdb	W	T	-4.78644	-11.5555	RADIATION DAMAGE TO THE TRAP-RNA COMPLEX: DOSE (DWD) 11.6 MGY
5eey.pdb	W	V	-4.78644	-11.5555	RADIATION DAMAGE TO THE TRAP-RNA COMPLEX: DOSE (DWD) 11.6 MGY
5eez.pdb	W	A	-4.78644	-11.5348	RADIATION DAMAGE TO THE TRAP-RNA COMPLEX: DOSE (DWD) 14.2 MGY
5eez.pdb	W	C	-4.78644	-11.5348	RADIATION DAMAGE TO THE TRAP-RNA COMPLEX: DOSE (DWD) 14.2 MGY
5eez.pdb	W	B	-4.78644	-11.5137	RADIATION DAMAGE TO THE TRAP-RNA COMPLEX: DOSE (DWD) 14.2 MGY
5eez.pdb	W	E	-4.78644	-11.5137	RADIATION DAMAGE TO THE TRAP-RNA COMPLEX: DOSE (DWD) 14.2 MGY
5eez.pdb	W	D	-4.78644	-11.5348	RADIATION DAMAGE TO THE TRAP-RNA COMPLEX: DOSE (DWD) 14.2 MGY
5eez.pdb	W	G	-4.78644	-11.5348	RADIATION DAMAGE TO THE TRAP-RNA COMPLEX: DOSE (DWD) 14.2 MGY
5eez.pdb	W	F	-4.78644	-11.5555	RADIATION DAMAGE TO THE TRAP-RNA COMPLEX: DOSE (DWD) 14.2 MGY
5eez.pdb	W	I	-4.78644	-11.5137	RADIATION DAMAGE TO THE TRAP-RNA COMPLEX: DOSE (DWD) 14.2 MGY
5eez.pdb	W	H	-4.78644	-11.5137	RADIATION DAMAGE TO THE TRAP-RNA COMPLEX: DOSE (DWD) 14.2 MGY
5eez.pdb	W	K	-4.78644	-11.5137	RADIATION DAMAGE TO THE TRAP-RNA COMPLEX: DOSE (DWD) 14.2 MGY
5eez.pdb	W	J	-4.78644	-11.4924	RADIATION DAMAGE TO THE TRAP-RNA COMPLEX: DOSE (DWD) 14.2 MGY
5eez.pdb	W	M	-4.78644	-11.5555	RADIATION DAMAGE TO THE TRAP-RNA COMPLEX: DOSE (DWD) 14.2 MGY
5eez.pdb	W	L	-4.78644	-11.576	RADIATION DAMAGE TO THE TRAP-RNA COMPLEX: DOSE (DWD) 14.2 MGY
5eez.pdb	W	O	-4.78644	-10.5555	RADIATION DAMAGE TO THE TRAP-RNA COMPLEX: DOSE (DWD) 14.2 MGY
5eez.pdb	W	N	-4.78644	-11.5555	RADIATION DAMAGE TO THE TRAP-RNA COMPLEX: DOSE (DWD) 14.2 MGY
5eez.pdb	W	Q	-4.78644	-10.5555	RADIATION DAMAGE TO THE TRAP-RNA COMPLEX: DOSE (DWD) 14.2 MGY
5eez.pdb	W	P	-4.78644	-11.5555	RADIATION DAMAGE TO THE TRAP-RNA COMPLEX: DOSE (DWD) 14.2 MGY
5eez.pdb	W	S	-4.78644	-11.5555	RADIATION DAMAGE TO THE TRAP-RNA COMPLEX: DOSE (DWD) 14.2 MGY
5eez.pdb	W	R	-4.78644	-11.5555	RADIATION DAMAGE TO THE TRAP-RNA COMPLEX: DOSE (DWD) 14.2 MGY
5eez.pdb	W	U	-4.78644	-10.5555	RADIATION DAMAGE TO THE TRAP-RNA COMPLEX: DOSE (DWD) 14.2 MGY
5eez.pdb	W	T	-4.78644	-11.5555	RADIATION DAMAGE TO THE TRAP-RNA COMPLEX: DOSE (DWD) 14.2 MGY
5eez.pdb	W	V	-4.78644	-11.5555	RADIATION DAMAGE TO THE TRAP-RNA COMPLEX: DOSE (DWD) 14.2 MGY
5ef0.pdb	W	A	-4.78644	-11.5348	RADIATION DAMAGE TO THE TRAP-RNA COMPLEX: DOSE (DWD) 16.7 MGY
5ef0.pdb	W	C	-4.78644	-11.5348	RADIATION DAMAGE TO THE TRAP-RNA COMPLEX: DOSE (DWD) 16.7 MGY
5ef0.pdb	W	B	-4.78644	-11.5137	RADIATION DAMAGE TO THE TRAP-RNA COMPLEX: DOSE (DWD) 16.7 MGY
5ef0.pdb	W	E	-4.78644	-11.5137	RADIATION DAMAGE TO THE TRAP-RNA COMPLEX: DOSE (DWD) 16.7 MGY
5ef0.pdb	W	D	-4.78644	-11.5348	RADIATION DAMAGE TO THE TRAP-RNA COMPLEX: DOSE (DWD) 16.7 MGY
5ef0.pdb	W	G	-4.78644	-11.5348	RADIATION DAMAGE TO THE TRAP-RNA COMPLEX: DOSE (DWD) 16.7 MGY
5ef0.pdb	W	F	-4.78644	-11.5555	RADIATION DAMAGE TO THE TRAP-RNA COMPLEX: DOSE (DWD) 16.7 MGY
5ef0.pdb	W	I	-4.78644	-11.5137	RADIATION DAMAGE TO THE TRAP-RNA COMPLEX: DOSE (DWD) 16.7 MGY
5ef0.pdb	W	H	-4.78644	-11.5137	RADIATION DAMAGE TO THE TRAP-RNA COMPLEX: DOSE (DWD) 16.7 MGY
5ef0.pdb	W	K	-4.78644	-11.5137	RADIATION DAMAGE TO THE TRAP-RNA COMPLEX: DOSE (DWD) 16.7 MGY
5ef0.pdb	W	J	-4.78644	-11.4924	RADIATION DAMAGE TO THE TRAP-RNA COMPLEX: DOSE (DWD) 16.7 MGY
5ef0.pdb	W	M	-4.78644	-11.5555	RADIATION DAMAGE TO THE TRAP-RNA COMPLEX: DOSE (DWD) 16.7 MGY
5ef0.pdb	W	L	-4.78644	-11.576	RADIATION DAMAGE TO THE TRAP-RNA COMPLEX: DOSE (DWD) 16.7 MGY
5ef0.pdb	W	O	-4.78644	-10.5555	RADIATION DAMAGE TO THE TRAP-RNA COMPLEX: DOSE (DWD) 16.7 MGY
5ef0.pdb	W	N	-4.78644	-11.5555	RADIATION DAMAGE TO THE TRAP-RNA COMPLEX: DOSE (DWD) 16.7 MGY
5ef0.pdb	W	Q	-4.78644	-10.5555	RADIATION DAMAGE TO THE TRAP-RNA COMPLEX: DOSE (DWD) 16.7 MGY
5ef0.pdb	W	P	-4.78644	-11.5555	RADIATION DAMAGE TO THE TRAP-RNA COMPLEX: DOSE (DWD) 16.7 MGY
5ef0.pdb	W	S	-4.78644	-11.5555	RADIATION DAMAGE TO THE TRAP-RNA COMPLEX: DOSE (DWD) 16.7 MGY
5ef0.pdb	W	R	-4.78644	-11.5555	RADIATION DAMAGE TO THE TRAP-RNA COMPLEX: DOSE (DWD) 16.7 MGY
5ef0.pdb	W	U	-4.78644	-10.5555	RADIATION DAMAGE TO THE TRAP-RNA COMPLEX: DOSE (DWD) 16.7 MGY
5ef0.pdb	W	T	-4.78644	-11.5555	RADIATION DAMAGE TO THE TRAP-RNA COMPLEX: DOSE (DWD) 16.7 MGY
5ef0.pdb	W	V	-4.78644	-11.5555	RADIATION DAMAGE TO THE TRAP-RNA COMPLEX: DOSE (DWD) 16.7 MGY
5ef1.pdb	W	A	-4.78644	-11.5348	RADIATION DAMAGE TO THE TRAP-RNA COMPLEX: DOSE (DWD) 19.3 MGY
5ef1.pdb	W	C	-4.78644	-11.5348	RADIATION DAMAGE TO THE TRAP-RNA COMPLEX: DOSE (DWD) 19.3 MGY
5ef1.pdb	W	B	-4.78644	-11.5137	RADIATION DAMAGE TO THE TRAP-RNA COMPLEX: DOSE (DWD) 19.3 MGY
5ef1.pdb	W	E	-4.78644	-11.5137	RADIATION DAMAGE TO THE TRAP-RNA COMPLEX: DOSE (DWD) 19.3 MGY
5ef1.pdb	W	D	-4.78644	-11.5348	RADIATION DAMAGE TO THE TRAP-RNA COMPLEX: DOSE (DWD) 19.3 MGY
5ef1.pdb	W	G	-4.78644	-11.5348	RADIATION DAMAGE TO THE TRAP-RNA COMPLEX: DOSE (DWD) 19.3 MGY
5ef1.pdb	W	F	-4.78644	-11.5555	RADIATION DAMAGE TO THE TRAP-RNA COMPLEX: DOSE (DWD) 19.3 MGY
5ef1.pdb	W	I	-4.78644	-11.5137	RADIATION DAMAGE TO THE TRAP-RNA COMPLEX: DOSE (DWD) 19.3 MGY
5ef1.pdb	W	H	-4.78644	-11.5137	RADIATION DAMAGE TO THE TRAP-RNA COMPLEX: DOSE (DWD) 19.3 MGY
5ef1.pdb	W	K	-4.78644	-11.5137	RADIATION DAMAGE TO THE TRAP-RNA COMPLEX: DOSE (DWD) 19.3 MGY
[truncated: 153 more rows]
