# Supplementary material for: RNA structure drives interaction with proteins
Source: Nat Commun. 2019 Jul 19;10:3246. doi: 10.1038/s41467-019-10923-5 (PMC6642211; doi:10.1038/s41467-019-10923-5)
Supplement: Supplementary file 7 — Supplementary Data 3 [file 41467_2019_10923_MOESM7_ESM.xlsx]

## Sheet: High Structured
Transcript ID	Structural Content (PARS)	Number of Protein binders (eCLIP)
ENST00000361390	0.623431	0
NM_001101	0.613135	23
ENST00000361739	0.596491	0
ENST00000361453	0.588292	0
NM_001961	0.586447	28
ENST00000361899	0.56975	0
ENST00000361567	0.565121	0
ENST00000361624	0.562905	0
NM_178014	0.56182	26
NM_001614	0.549849	24
NM_000146	0.548794	15
NM_002952	0.547771	15
NM_002823	0.545681	29
NR_037688	0.54491	24
NM_001099285	0.543496	29
ENST00000361381	0.540639	0
NM_005022	0.532838	16
NM_000973	0.528	14
ENST00000362079	0.52551	0
ENST00000390323	0.521645	0
NM_002568	0.519231	20
ENST00000361789	0.518843	0
NM_002046	0.515546	14
NM_004355	0.515111	11
NR_026712	0.513678	0
NM_001199954	0.511164	0
ENST00000361851	0.507246	0
NM_002654	0.506997	30
NM_001404	0.505202	14
NM_002629	0.504651	5
NM_006098	0.504058	14
NM_000980	0.501618	6
ENST00000390325	0.5	0
NM_001025159	0.498513	11
NM_001009	0.497976	0
NM_001206797	0.497587	29
NM_001025158	0.496552	11
ENST00000361227	0.491329	0
NM_012423	0.490231	25
NM_007355	0.49015	38
NM_021109	0.489666	5
NM_000365	0.487787	0
NM_007209	0.486957	16
NM_033301	0.486957	13
NM_000979	0.486739	17
NM_001010	0.486128	23
ENST00000387347	0.485879	0
NM_006082	0.484295	20
NM_021103	0.483402	14
NM_006762	0.482589	17
NM_001636	0.479111	0
NM_184043	0.479046	20
NM_002295	0.478185	5
NM_001175	0.477796	5
NM_001206798	0.477039	30
NM_184041	0.476884	21
NM_000967	0.476084	3
NM_001012321	0.474886	0
NM_000968	0.47467	27
NM_001020	0.474576	15
NM_007074	0.47438	0
ENST00000389680	0.473795	0
ENST00000361335	0.47138	0
NM_001256799	0.471215	12
NM_145899	0.471149	25
NM_182471	0.471012	28
NM_001243042	0.470366	0
NM_002117	0.470366	12
NM_001004	0.46856	13
NM_002298	0.468074	18
NM_001206799	0.467581	0
NM_002131	0.466327	25
NM_001207019	0.465947	0
NM_019111	0.464536	0
NM_002002	0.464396	0
NM_001013	0.464236	14
NM_003088	0.462804	27
NM_004559	0.46119	9
NM_001012	0.460993	12
NM_021149	0.460822	10
NM_001970	0.459041	23
NM_001220500	0.458925	0
NM_001428	0.457705	26
NM_001018	0.457627	9
NM_004343	0.456829	37
NM_002872	0.456403	9
NM_001838	0.456044	0
NM_003295	0.455971	11
NM_001159287	0.452055	0
NM_000992	0.451799	11
NM_000970	0.451782	12
NM_001021	0.451546	0
NM_001199057	0.451546	0
NM_020992	0.449345	16
NM_001033853	0.449202	3
NM_145903	0.447996	25
NM_001016	0.447316	12
NM_006325	0.447246	19
NM_005720	0.446767	16
NM_001003	0.443359	8
NM_006597	0.443054	36
NM_001002	0.442691	14
NM_001143761	0.442368	23
NM_002415	0.442068	10
NM_022551	0.440959	11
NM_001686	0.440043	31
NM_053275	0.439082	14
NM_000969	0.438409	17
NM_001143760	0.437898	21
ENST00000365328	0.413897	0
ENST00000547717	0.373011	0
ENST00000390607	0.353488	0
ENST00000302125	0.33697	0
ENST00000562726	0.334786	0
ENST00000390237	0.328872	0
ENST00000548861	0.319018	0
ENST00000567078	0.304974	0
ENST00000362464	0.302521	0
ENST00000362467	0.302521	0
ENST00000362526	0.302521	0
ENST00000363511	0.302521	0
ENST00000365055	0.302521	0
ENST00000363473	0.294118	0
ENST00000364718	0.294118	0
ENST00000365651	0.294118	0

## Sheet: Low Structured
Transcript ID	Structural Content (PARS)	Number of Protein binders (eCLIP)
ENST00000244906	0	0
ENST00000262283	0	0
ENST00000281961	0	1
ENST00000297354	0	0
ENST00000311067	0	0
ENST00000313616	0	0
ENST00000314481	0	0
ENST00000317019	0	0
ENST00000319701	0	0
ENST00000320322	0	0
ENST00000323223	0	0
ENST00000327581	0	0
ENST00000333854	0	0
ENST00000334165	0	0
ENST00000342888	0	0
ENST00000345111	0	0
ENST00000355869	0	0
ENST00000356006	0	0
ENST00000358748	0	0
ENST00000359823	0	0
ENST00000360083	0	0
ENST00000362332	0	0
ENST00000362356	0	0
ENST00000362370	0	0
ENST00000362484	0	0
ENST00000362534	0	0
ENST00000362537	0	0
ENST00000362655	0	0
ENST00000362768	0	0
ENST00000362863	0	0
ENST00000362918	0	0
ENST00000362967	0	0
ENST00000363004	0	0
ENST00000363306	0	0
ENST00000363646	0	0
ENST00000363817	0	0
ENST00000364044	0	0
ENST00000364144	0	0
ENST00000364171	0	0
ENST00000364298	0	0
ENST00000364394	0	0
ENST00000364404	0	0
ENST00000364431	0	0
ENST00000364570	0	0
ENST00000364600	0	0
ENST00000364662	0	0
ENST00000364750	0	0
ENST00000364789	0	0
ENST00000364858	0	0
ENST00000364942	0	0
ENST00000365129	0	0
ENST00000365174	0	0
ENST00000365186	0	0
ENST00000365254	0	0
ENST00000365378	0	0
ENST00000365420	0	0
ENST00000365454	0	0
ENST00000365464	0	0
ENST00000365477	0	0
ENST00000365541	0	0
ENST00000365609	0	0
ENST00000366105	0	0
ENST00000366109	0	0
ENST00000366136	0	0
ENST00000366167	0	0
ENST00000366278	0	0
ENST00000366397	0	0
ENST00000367119	0	0
ENST00000369884	0	0
ENST00000371970	0	0
ENST00000372490	0	0
ENST00000373604	0	0
ENST00000377186	0	0
ENST00000377547	0	0
ENST00000377977	0	0
ENST00000379256	0	0
ENST00000384195	0	0
ENST00000384787	0	0
ENST00000384910	0	0
ENST00000385253	0	0
ENST00000387382	0	0
ENST00000387416	0	0
ENST00000387439	0	0
ENST00000387441	0	0
ENST00000387446	0	0
ENST00000390265	0	0
ENST00000390284	0	0
ENST00000390291	0	0
ENST00000390305	0	0
ENST00000390314	0	0
ENST00000390316	0	0
ENST00000390320	0	0
ENST00000390324	0	0
ENST00000390348	0	0
ENST00000390423	0	0
ENST00000390483	0	0
ENST00000390484	0	0
ENST00000390485	0	0
ENST00000390490	0	0
ENST00000390491	0	0
ENST00000390493	0	0
ENST00000390508	0	0
ENST00000390510	0	0
ENST00000390511	0	0
ENST00000390513	0	0
ENST00000390514	0	0
ENST00000390519	0	0
ENST00000390520	0	0
ENST00000390524	0	0
ENST00000390526	0	0
ENST00000390528	0	0
ENST00000390529	0	0
ENST00000390534	0	0
ENST00000390535	0	0
ENST00000390605	0	0
ENST00000390616	0	0
ENST00000390632	0	0
ENST00000390633	0	0
ENST00000390836	0	0
ENST00000391195	0	0
ENST00000391240	0	0
ENST00000391299	0	0
ENST00000391353	0	0
ENST00000392227	0	0
ENST00000394742	0	0
ENST00000396885	0	0
ENST00000397644	0	0
ENST00000397645	0	0
