# Supplementary material for: RNA structure drives interaction with proteins
Source: Nat Commun. 2019 Jul 19;10:3246. doi: 10.1038/s41467-019-10923-5 (PMC6642211; doi:10.1038/s41467-019-10923-5)
Supplement: Supplementary file 8 — Supplementary Data 4 [file 41467_2019_10923_MOESM8_ESM.xlsx]

## Sheet: UniProt RBPs
dsRNA binders	ssRNA binders
A0A024B7W1	A0A1D6IEG9
A0KEX6	A0B738
A0KR66	A1RT54
A0MQH0	A1RXH8
A1AGH4	A1RXQ7
A1IP83	A2ARM1
A1JRY6	A2BL78
A1KWL6	A2SQD1
A1RDY7	A2VD92
A1S1K5	A3CUA0
A1SR31	A3DMX9
A1TWN4	A3LQL9
A1WZH9	A3LXL0
A2RV29	A3MV08
A3CYL0	A4FWP8
A3M154	A4WM20
A3N1E4	A4YIP0
A3QJE8	A5DM21
A4IG62	A5DW14
A4ST51	A5UJS0
A4TH27	A5UKA4
A4VFI1	A6M931
A4WF91	A6N7Y9
A4XNB6	A6QRA1
A4Y1D2	A6UPT0
A5EW39	A6UV02
A5F4C5	A6VGM3
A5UE77	A7I6K3
A5UHE9	A7LN87
A5VWK1	A8A8J3
A6QR44	A8MA86
A6TET6	A9A5C8
A6UX84	A9AA28
A6VL69	A9CTE0
A6VT87	B0R6C7
A6WHB6	B1L6N8
A7FNJ8	B1Y919
A7MPF3	B2BNE8
A7N129	B4FZ81
A7ZSH1	B5DF93
A8A587	B6YSY6
A8AQH7	B8D687
A8BQJ3	B8GFL8
A8FP81	B9LR58
A8GKG1	C3MJP0
A8GYH9	C3MYZ8
A9KH21	C3N047
A9KUA7	C3N8R1
A9M4K6	C3NMQ7
A9MN84	C4KJ86
A9N8A7	C5A1K9
A9N9G8	D0VWM8
A9R933	D3ZCL3
A9WJ69	D5MCN2
B0BQ80	D5U396
B0JZ85	E0SQX5
B0KF32	E1C6F0
B0RWR5	E3GZ90
B0TLD6	F4I3B3
B0U4N0	F4IHL3
B0UWV9	F4JVI3
B0V3F8	G3V9R8
B0VCB7	G5EFF1
B0VNL3	O00257
B1IQ17	O01367
B1J499	O13713
B1JJI2	O13828
B1KCX0	O14040
B1LGN9	O14327
B1X6D5	O14459
B2FIS1	O14979
B2I111	O23174
B2I8S9	O23212
B2K500	O26780
B2SL46	O26977
B2U2Q0	O28380
B3GY27	O29758
B3PGZ1	O42978
B5DF91	O43347
C1D9T5	O50061
C5H431	O55187
C8XPA8	O59221
C8XPB2	O59362
D3ZEH5	O60016
D4G8K6	O60506
D5V9A9	O74499
D7RF80	O74957
E9Q9A9	O82307
F1N3B8	O95503
G3V645	O97716
O01326	P03526
O04492	P04083
O07451	P04147
O15455	P05455
O35286	P07910
O35763	P07940
O43042	P09234
O43143	P09651
O67082	P0A972
O69161	P0A9X9
O75569	P0ACG8
O84299	P0ACG9
O94530	P0ACH0
O95793	P0CR68
P00973	P10107
P02786	P10827
P03314	P10881
P03495	P11940
P05213	P12002
P05769	P16914
P07564	P19339
P07720	P20965
P08195	P21187
P08238	P23241
P08670	P23321
P09732	P26368
P09866	P26369
P0A7Y0	P26599
P0AFR4	P26651
P0AFR5	P28750
P0AFR6	P29341
P10809	P31209
P10852	P31483
P11442	P31943
P11499	P32067
P11928	P32505
P12814	P32588
P12823	P33920
P14335	P34087
P14336	P34398
P14337	P36102
P14340	P36629
P14403	P36776
P15442	P38159
P17763	P38421
P19110	P38656
P19525	P38919
P20152	P40032
P21605	P40561
P22192	P40764
P22338	P41073
P24785	P43332
P25159	P44754
P26038	P46279
P26041	P47047
P27395	P50433
P27909	P52597
P27914	P53725
P27915	P53996
P28156	P54253
P29728	P54254
P29837	P57052
P29990	P60824
P29991	P60825
P30131	P60826
P31000	P60889
P32579	P61286
P32886	P62083
P33478	P62487
P34058	P62488
P34384	P62489
P36516	P62634
P38801	P62995
P38912	P62996
P39153	P62997
P40596	P63058
P41880	P63059
P44441	P63271
P44807	P63272
P45103	P78814
P45748	P81205
P45831	P83484
P48616	P90727
P51400	P90978
P51833	P93831
P51837	P95980
P57561	P97343
P60842	Q01560
P60843	Q03267
P63038	Q04836
P63039	Q05022
P68363	Q05196
P68371	Q05323
P68372	Q07666
P70372	Q07687
P74368	Q09702
P75419	Q0V9A9
P78563	Q0W793
P81947	Q0WSH6
P97473	Q0WW84
P9WGC8	Q10103
P9WGC9	Q10145
P9WH03	Q10572
Q00610	Q12V67
Q01299	Q12ZB8
Q02555	Q13310
Q02987	Q13325
Q02V59	Q17339
Q03963	Q1JQ73
Q04538	Q1LZ83
Q05961	Q1ZXC2
Q074N0	Q24562
Q08A23	Q24731
Q08I43	Q28ZX3
Q09884	Q2FLB2
Q0A5B4	Q2NEM0
Q0DJA3	Q2NEX6
Q0HPA1	Q2NL22
Q0I0R7	Q2QZL4
Q0I1B6	Q2R0Q1
Q0IIG6	Q32N92
Q0IQN6	Q32NN2
Q0IV63	Q32PA0
Q0PV50	Q3B8Q2
Q0T019	Q3INE3
Q0TCH9	Q3MHY8
Q0VC80	Q3SWU3
Q0VTD8	Q3SYX6
Q12905	Q3TC46
Q12906	Q3UWR2
Q12TA0	Q3ZBT6
Q14699	Q3ZC82
Q15633	Q42029
Q15646	Q44264
Q15717	Q469M4
Q15ZX7	Q46DW1
Q1C2Y3	Q4G078
Q1CCY0	Q4JB26
Q1H4G9	Q4JCH7
Q1I2G9	Q4V7K4
Q1LT55	Q4V898
Q1Q7W4	Q53H82
Q1QTJ8	Q54BM2
Q1R650	Q54P04
Q1X880	Q54ZS8
Q1X881	Q55CP6
Q21PU1	Q561R9
Q22307	Q58603
Q28IN9	Q587J6
Q29599	Q58DS6
Q29RW1	Q5B630
Q2FZ50	Q5E9B8
Q2HJ49	Q5E9J1
Q2HJ92	Q5F3Z9
Q2KIS2	Q5JH14
Q2KIT1	Q5JIR5
Q2NQQ7	Q5NVJ8
Q2P833	Q5R6G2
Q2SQW8	Q5R9H4
Q2V905	Q5RA82
Q2YHF0	Q5RCW2
Q2YHF2	Q5T7N2
Q31JQ7	Q5TYQ8
Q31VZ4	Q5U259
Q32B67	Q5V1H7
Q32MZ4	Q5VWX1
Q32ZD4	Q5XFR0
Q32ZD5	Q5XGR8
Q32ZD7	Q5XH91
Q32ZE0	Q5YD48
Q32ZE1	Q5ZJC8
Q3B7N2	Q5ZMK5
Q3B8Q1	Q60749
Q3BNJ9	Q60HC3
Q3IDH7	Q61474
Q3J7C4	Q628A6
Q3KKE2	Q63285
Q3MHM5	Q63540
Q3SG43	Q64204
Q3SWU0	Q6AUK6
Q3SZ54	Q6AXC6
Q3U5F4	Q6AYK2
Q3YWX6	Q6BHA5
Q43950	Q6BI95
Q48AU1	Q6BZG0
Q48QH8	Q6CP23
Q493I0	Q6CSV3
Q49404	Q6CWW9
Q499R4	Q6DEY7
Q4FPS7	Q6DGQ0
Q4KKQ6	Q6FKG4
Q4QMR0	Q6FKP2
Q4R4T5	Q6FMX1
Q4R4X4	Q6FRZ5
Q4SS66	Q6GLB5
Q4UQ07	Q6GND3
Q4V8C7	Q6GR16
Q500S6	Q6IP09
Q55637	Q6L1F0
Q55638	Q6L222
Q56056	Q6LXR3
Q568A0	Q6NML5
Q56XG6	Q6NVP7
Q57J68	Q6NYC1
Q58123	Q6NYF0
Q58HT7	Q6P6Q6
Q5BJ52	Q6PFM0
Q5BJS0	Q6PJT7
Q5BKD0	Q6TY21
Q5E1R5	Q6XE24
Q5EBA1	Q71RC2
Q5F5I5	Q74MB1
Q5H5D8	Q74ZS6
Q5HZJ0	Q752J8
Q5MYT7	Q759T6
Q5MYT9	Q75BU9
Q5MYU0	Q794E4
Q5PIS8	Q7KNF2
Q5QXJ5	Q7S743
Q5R4W8	Q7TMD5
Q5R5J3	Q7TMK9
Q5RDH6	Q7TP47
Q5RFJ1	Q7Z6M4
Q5SX39	Q7ZW41
Q5TJ59	Q7ZX37
Q5UB51	Q7ZXB8
Q5UCB8	Q804A5
Q5WPU5	Q80YT9
Q5ZJT0	Q812E0
Q5ZKU0	Q84T68
Q5ZL72	Q84X53
Q60369	Q84ZD2
Q603G8	Q86TB9
Q60856	Q8BJ05
Q61XX9	Q8BVN4
Q62351	Q8BWL5
Q63184	Q8BWW4
Q65WC1	Q8C9A2
Q664V8	Q8CCS6
Q68FD5	Q8CGK3
Q68SB1	Q8CI75
Q6A0D4	Q8IYB7
Q6AXF6	Q8JJE2
Q6DD04	Q8K1R3
Q6DV88	Q8K3P4
Q6FFH9	Q8L716
Q6GL57	Q8L844
Q6GPZ1	Q8LCQ3
Q6J3P1	Q8LE42
Q6LLJ9	Q8N8Q3
Q6NXA4	Q8PTT9
Q6NZ06	Q8PXC6
Q6P8G1	Q8R3J4
Q6P9T8	Q8RW96
Q6P9V9	Q8RWG2
Q6Q3F5	Q8T6B9
Q6YMS3	Q8TAS1
Q6YMS4	Q8TCS8
Q6YW64	Q8TH87
Q74AX1	Q8TPX7
Q74XX5	Q8TXP3
Q794F9	Q8TYC0
Q7L2E3	Q8U076
Q7MGL3	Q8U0L8
Q7MYI5	Q8VDS3
Q7NH89	Q8VXZ9
Q7P0L7	Q8W493
Q7SXR1	Q8ZVM8
Q7T6D2	Q8ZVU9
Q7TP98	Q90WU3
Q7TPR4	Q91903
Q7TQC5	Q91V33
Q7UGZ7	Q91VC3
Q7VNS3	Q91W45
Q7VQB9	Q920F3
Q7XA66	Q920Q6
Q7Z2E3	Q923K9
Q7ZYA5	Q924S5
Q80WJ7	Q93062
Q80YD1	Q93W34
Q819V8	Q93ZC9
Q83AA2	Q94535
Q83JD1	Q94C60
Q86U90	Q95XU6
Q86UE4	Q96DH6
Q87AQ5	Q96E29
Q87KE2	Q96EP5
Q88B46	Q96EZ8
Q88RQ9	Q96FC9
Q89277	Q96J94
Q89A89	Q96YV2
Q8A2E8	Q975G7
Q8AVN9	Q97BZ6
Q8CIF6	Q97CE5
Q8CJ67	Q98SP8
Q8D257	Q99KR3
Q8DDD6	Q99L90
Q8DPJ8	Q9C652
Q8EH81	Q9C6A1
Q8EKQ3	Q9C9W5
Q8EXX3	Q9CQT2
Q8FD17	Q9D6V8
Q8GY79	Q9DBY5
Q8H1D4	Q9DDY9
Q8IYB8	Q9EPH8
Q8K4H4	Q9ERI5
Q8K977	Q9FGS0
Q8NBJ9	Q9FK23
Q8P4F2	Q9FKW6
Q8PB52	Q9FM80
Q8PG13	Q9FPJ8
Q8R418	Q9FVV4
Q8RGX3	Q9H361
Q8S1Z0	Q9HC52
Q8VHK9	Q9HIP3
Q8VI93	Q9HLX7
Q8VI94	Q9HP65
Q8VI95	Q9JII5
Q8WYQ5	Q9JLP1
Q8X8F8	Q9JMB7
Q8Y691	Q9LEB3
Q8Z1W6	Q9LEB4
Q8ZD72	Q9LJX4
Q8ZLN0	Q9LVW6
Q91550	Q9LX74
Q91836	Q9LX90
Q91B85	Q9LYA9
Q91ZS8	Q9M219
Q924S2	Q9NQ94
Q970S6	Q9P6M8
Q98803	Q9P7K8
Q99376	Q9QXV1
Q99D35	Q9QZH3
Q99MB1	Q9S841
Q99PU8	Q9SAB3
Q9AV50	Q9SHY8
Q9CLG4	Q9STF9
Q9CWV6	Q9SX79
Q9CXY6	Q9SX80
Q9CY73	Q9SZJ5
Q9D7B1	Q9TVQ5
Q9EQM6	Q9TZ93
Q9FYL8	Q9UN81
Q9GKX8	Q9UNP9
Q9GZC8	Q9UUI1
Q9H2U1	Q9UXC4
Q9H875	Q9UXT7
Q9H9J2	Q9V120
Q9I7A5	Q9V1F2
Q9JIK5	Q9VNV3
Q9JIL3	Q9VPD5
Q9JKP5	Q9VVE5
Q9JXA4	Q9W6I1
Q9KPB2	Q9WU01
Q9KVT5	Q9WV02
Q9LXW7	Q9WVB0
Q9NII1	Q9XUB2
Q9NR30	Q9Y580
Q9NR56	Q9YA42
Q9NRR4	Q9YC02
Q9NUL3	Q9YGP5
Q9NX74	Q9Z130
Q9PEV9	Q9Z199
Q9Q6P4	Q9Z204
Q9R0B7	Q9Z2X1
Q9S9P3	Q9ZSM8
Q9SKN2	Q9ZT96
Q9SZV0	Q9ZUU4
Q9UL40
Q9UPY3
Q9UYB2
Q9VG73
Q9WDA6
Q9WTX2
Q9X0I6
Q9XCX9
Q9Y623
Q9Y6K5
Q9YRV3
Q9Z1P2
Q9Z1W6
Q9Z1X4
Q9Z2F2
Q9ZBQ7
