# Supplementary material for: RNA structure drives interaction with proteins
Source: Nat Commun. 2019 Jul 19;10:3246. doi: 10.1038/s41467-019-10923-5 (PMC6642211; doi:10.1038/s41467-019-10923-5)
Supplement: Supplementary file 9 — Supplementary Data 5 [file 41467_2019_10923_MOESM9_ESM.xlsx]

## Sheet: Hsp70 mRNA
Protein IDs	Protein names	Gene names	p-value (RNA over BG)	Enrichment RNA over BG
P23246;H0Y9K7;H0Y9U2;C9IZL7;H7C367;Q15233	Splicing factor, proline- and glutamine-rich	SFPQ	3.25306	5.25208
H0YJB9;G3V4C6;Q9Y224	UPF0568 protein C14orf166	C14orf166	3.21954	4.15953
H7BZJ3		PDIA3	2.94981	-4.65485
F6WST4;A0A0K0K1C5;Q9P0S3;Q53FV1	ORM1-like protein 1;ORM1-like protein 2	ORMDL1;ORMDL2	2.6967	2.48776
M0R0Z0;X6R2L4;Q9Y230	RuvB-like 2	RUVBL2	2.47723	-1.67859
Q01085	Nucleolysin TIAR	TIAL1	2.06872	-3.09824
E9PJD9;E9PLX7;P46776	60S ribosomal protein L27a	RPL27A	1.91111	-0.816346
P55060	Exportin-2	CSE1L	1.89666	-4.05777
P35580	Myosin-10	MYH10	1.8663	-3.56914
P16989;A0A0D9SEI8	Y-box-binding protein 3	YBX3	1.82593	-1.45983
P09629	Homeobox protein Hox-B7	HOXB7	1.77922	-2.64947
J3KS31;J3QRS9;X6R4W8;O43670	BUB3-interacting and GLEBS motif-containing protein ZNF207	ZNF207	1.77034	-2.77713
P55735	Protein SEC13 homolog	SEC13	1.75934	-4.23409
Q9H0L4	Cleavage stimulation factor subunit 2 tau variant	CSTF2T	1.74262	-4.39897
Q5HY57;P50402	Emerin	EMD	1.73102	2.71486
Q9Y2W1	Thyroid hormone receptor-associated protein 3	THRAP3	1.66639	-5.42682
Q15427	Splicing factor 3B subunit 4	SF3B4	1.57374	2.80043
Q09666	Neuroblast differentiation-associated protein AHNAK	AHNAK	1.46855	-1.79308
Q9NSE4	Isoleucine--tRNA ligase, mitochondrial	IARS2	1.45578	-1.29068
P31942	Heterogeneous nuclear ribonucleoprotein H3	HNRNPH3	1.45137	-3.60204
G5E9Z2;Q96KA5	Cleft lip and palate transmembrane protein 1-like protein	CLPTM1L	1.43379	-1.4247
C9JG35;C9J092;C9JCJ0;Q96K58	Zinc finger protein 668	ZNF668	1.42352	0.539767
Q9H1E3	Nuclear ubiquitous casein and cyclin-dependent kinase substrate 1	NUCKS1	1.42165	-4.44071
C9JUE0;C9JJP5;Q05BK6;Q92734	Protein TFG	TFG	1.39427	2.35004
O60927	Protein phosphatase 1 regulatory subunit 11	PPP1R11	1.38854	1.02581
H3BUF6;Q8WWM7;H3BSK9	Ataxin-2-like protein	ATXN2L	1.36765	-4.24374
B0QY90;B0QY89;Q9Y262	Eukaryotic translation initiation factor 3 subunit L	EIF3L	1.35057	-4.48611
D6RC37;D6R970;P53999	Activated RNA polymerase II transcriptional coactivator p15	SUB1	1.31657	-4.20238
A0A0D9SFB3;A0A0D9SG12;A0A0D9SF53;O00571;O15523;A0A087WX09;A0A087WVZ1;B4DLA0;A0A0J9YVQ7;D6RCM4;Q9NQI0	ATP-dependent RNA helicase DDX3X;ATP-dependent RNA helicase DDX3Y	DDX3X;DDX3Y	1.3038	-4.20523
Q9Y5B9	FACT complex subunit SPT16	SUPT16H	1.28116	0.989288
M0QXD6;P35269	General transcription factor IIF subunit 1	GTF2F1	1.21988	2.65221
P08670	Vimentin	VIM	1.2138	-2.67524
P62269	40S ribosomal protein S18	RPS18	1.21089	-0.959693
P62306	Small nuclear ribonucleoprotein F	SNRPF	1.20726	0.905229
Q12906	Interleukin enhancer-binding factor 3	ILF3	1.14941	-2.58241
Q14847	LIM and SH3 domain protein 1	LASP1	1.14765	-1.32982
M0R3F1;A0A0A0MRA5;B7Z4B8;Q9BUJ2;M0QYM5;M0QYI8;M0QYZ0	Heterogeneous nuclear ribonucleoprotein U-like protein 1	HNRNPUL1	1.13843	-2.3329
Q04941	Proteolipid protein 2	PLP2	1.12568	-1.77397
P35579;B1PS43;P35749;A0A0C4DFM8	Myosin-9	MYH9	1.11692	-2.39409
H0YA93;Q86UW6	NEDD4-binding protein 2	N4BP2	1.09694	2.14492
A1KXE4	Myelin-associated neurite-outgrowth inhibitor	FAM168B	1.09649	1.13218
H7C3A1;Q9BXP5	Serrate RNA effector molecule homolog	SRRT	1.09148	-2.13874
O15355	Protein phosphatase 1G	PPM1G	1.06052	-1.37258
Q8NDV7	Trinucleotide repeat-containing gene 6A protein	TNRC6A	1.05361	-2.10549
F8W667;F8VV04;Q15020	Squamous cell carcinoma antigen recognized by T-cells 3	SART3	1.04229	-0.452821
Q8NBJ5	Procollagen galactosyltransferase 1	COLGALT1	1.03778	-2.64721
A0A0A0MRM9;Q14978;S4R349	Nucleolar and coiled-body phosphoprotein 1	NOLC1	1.01652	-4.20624
P30050	60S ribosomal protein L12	RPL12	1.01301	-2.78277
S4R3H4;E7EQT4;Q9UKV3;A0A087WYN3;G3V3B0	Apoptotic chromatin condensation inducer in the nucleus	ACIN1	1.0116	-2.32327
H0YDU9;Q14677	Clathrin interactor 1	CLINT1	0.983758	1.78126
V9GYQ5;V9GZ59;P61964	WD repeat-containing protein 5	WDR5	0.975767	1.70797
P80723;U3KQP0	Brain acid soluble protein 1	BASP1	0.967398	-1.88527
Q71U36;P68363;F8VRZ4;F8VS66;F8VQQ4;F8VVB9;F5H5D3;Q9BQE3;F8VRK0;F8VX09;F8VWV9;F8VXZ7;F8W0F6;Q6PEY2;Q13748	Tubulin alpha-1A chain;Tubulin alpha-1B chain;Tubulin alpha-1C chain	TUBA1A;TUBA1B;TUBA1C	0.956595	0.992756
P08621	U1 small nuclear ribonucleoprotein 70 kDa	SNRNP70	0.943891	1.50422
E9PLA9;Q14444	Caprin-1	CAPRIN1	0.939384	-4.83272
Q14011	Cold-inducible RNA-binding protein	CIRBP	0.937507	-3.35523
D6R9B6;H0Y9Y4;D6RAT0;P61247	40S ribosomal protein S3a	RPS3A	0.924881	-0.603719
Q8N7H5;M0QYC7	RNA polymerase II-associated factor 1 homolog	PAF1	0.893029	-2.53321
E9PMM2;E9PKP7;P17480	Nucleolar transcription factor 1	UBTF	0.890174	1.53988
Q13283	Ras GTPase-activating protein-binding protein 1	G3BP1	0.884836	0.902793
C9JTN7;F8W8I6;P31483	Nucleolysin TIA-1 isoform p40	TIA1	0.882626	0.693916
P63261;K7EM38;I3L3R2;J3KT65;I3L3I0;I3L1U9;I3L4N8	Actin, cytoplasmic 2;Actin, cytoplasmic 2, N-terminally processed	ACTG1	0.872354	-0.619791
H7BY36;A0A0D9SFL3;B0QYK0;C9JGE3;Q01844	RNA-binding protein EWS	EWSR1	0.85933	1.58097
A0A075B7F4;Q92804;A0A075B7C1	TATA-binding protein-associated factor 2N	TAF15	0.845782	2.26034
J3KS98;P26373	60S ribosomal protein L13	RPL13	0.844482	3.01833
Q9H112	Cystatin-11	CST11	0.840034	-1.69369
D6RCT1;D6RBP6;D6RA49;D6RFL5;D6R9M7;D6REZ6;D6RBS9;D6R9D6;A0AV96	RNA-binding protein 47	RBM47	0.83964	0.550313
O43823	A-kinase anchor protein 8	AKAP8	0.831897	0.773437
A0A087WU03		HNRNPDL	0.82538	0.943182
P61254	60S ribosomal protein L26	RPL26	0.784328	-2.7723
Q8WVC0	RNA polymerase-associated protein LEO1	LEO1	0.783566	0.872444
F1T0B3;A0A087X2G1;Q92499	ATP-dependent RNA helicase DDX1	DDX1	0.775465	-3.7534
A0A0C4DFQ1;A0A0A0MRK6;Q13505	Metaxin-1	MTX1	0.762806	1.15965
D6RHC4;E9PDP5;Q8IWZ3	Ankyrin repeat and KH domain-containing protein 1	ANKHD1	0.759071	1.73133
F5H2U4;Q5T6F2	Ubiquitin-associated protein 2	UBAP2	0.743879	1.48357
P55884;C9JZG1	Eukaryotic translation initiation factor 3 subunit B	EIF3B	0.743316	-0.846785
M0R1H6;M0QZC5;P62280	40S ribosomal protein S11	RPS11	0.738999	1.81745
P52597	Heterogeneous nuclear ribonucleoprotein F;Heterogeneous nuclear ribonucleoprotein F, N-terminally processed	HNRNPF	0.734826	-3.63987
Q14694;H3BQC6;H3BNA1	Ubiquitin carboxyl-terminal hydrolase 10	USP10	0.729548	-2.42126
A0A0B4J213;A0A0C4DH44;P62888;E5RI99	60S ribosomal protein L30	RPL30	0.717651	3.13258
P51116;I3L1Z2	Fragile X mental retardation syndrome-related protein 2	FXR2	0.712231	-1.54916
P60709;G5E9R0;E7EVS6;C9JTX5;C9JZR7;P63267;P68133;P68032;P62736;C9JUM1;F8WB63;B8ZZJ2;C9JFL5;F6UVQ4;F6QUT6;A6NL76;Q6S8J3;A5A3E0;F8WCH0;Q9BYX7;Q562R1;P0CG39;P0CG38	Actin, cytoplasmic 1;Actin, cytoplasmic 1, N-terminally processed;Actin, gamma-enteric smooth muscle;Actin, alpha skeletal muscle;Actin, alpha cardiac muscle 1;Actin, aortic smooth muscle	ACTB;ACTG2;ACTA1;ACTC1;ACTA2	0.69431	1.29694
Q9Y3I0	tRNA-splicing ligase RtcB homolog	RTCB	0.691745	-3.18345
Q9NZB2;A0A0C4DG79;A0A0C4DH52	Constitutive coactivator of PPAR-gamma-like protein 1	FAM120A	0.665022	-2.36541
E9PJA7;E9PK09;E9PQN2;E9PKI6;E9PK91;Q9NYF8	Bcl-2-associated transcription factor 1	BCLAF1	0.655843	-1.5786
Q92908	Transcription factor GATA-6	GATA6	0.652147	-1.42714
Q00839	Heterogeneous nuclear ribonucleoprotein U	HNRNPU	0.645913	-2.57297
P11021	78 kDa glucose-regulated protein	HSPA5	0.643284	-2.18283
P13489;E9PMJ3;E9PLZ3;E9PIM9;E9PMA9;E9PMN0;E9PIK5;H0YCR7;E9PR82;E9PMI1	Ribonuclease inhibitor	RNH1	0.640024	-0.664642
Q92900	Regulator of nonsense transcripts 1	UPF1	0.628989	-1.89843
O75342	Arachidonate 12-lipoxygenase, 12R-type	ALOX12B	0.626219	-1.54237
E7EPN9;Q9Y520;H7C5N8;A0A0A0MS30	Protein PRRC2C	PRRC2C	0.604846	-2.37477
Q6UN15;H0Y8P7;A0A0B4J203	Pre-mRNA 3-end-processing factor FIP1	FIP1L1	0.589291	1.14018
Q8TF01	Arginine/serine-rich protein PNISR	PNISR	0.589267	-2.17853
Q7Z417	Nuclear fragile X mental retardation-interacting protein 2	NUFIP2	0.586054	-1.09052
P26196	Probable ATP-dependent RNA helicase DDX6	DDX6	0.582656	-2.82774
P19338;H7BY16;C9JYW2;C9JLB1;C9J1H7;C9JWL1	Nucleolin	NCL	0.572057	-1.96924
P05198	Eukaryotic translation initiation factor 2 subunit 1	EIF2S1	0.571802	-0.579838
P78344	Eukaryotic translation initiation factor 4 gamma 2	EIF4G2	0.564002	0.58573
E9PPU1;H0YEU2;E9PL09;P23396;E9PQ96;E9PJH4;F2Z2S8;H0YF32;E9PK82;H0YCJ7	40S ribosomal protein S3	RPS3	0.557725	1.06789
Q2M1V0	Intestine-specific homeobox	ISX	0.552482	0.961699
Q5H909;Q9UNF1	Melanoma-associated antigen D2	MAGED2	0.548041	0.57659
O75179;H0YLQ3;H0YM23	Ankyrin repeat domain-containing protein 17	ANKRD17	0.546452	1.79922
Q5H919;Q5H918;O43719	HIV Tat-specific factor 1	HTATSF1	0.537276	-1.8244
P26368	Splicing factor U2AF 65 kDa subunit	U2AF2	0.534887	0.685757
P22626;A0A087WUI2	Heterogeneous nuclear ribonucleoproteins A2/B1	HNRNPA2B1	0.520996	0.744797
Q5VU61;A0A087WWU8;Q5HYB6;J3KN67;K7EPV9;K7EMU5;K7EP68;K7ERG3;K7ENT6;P67936;P06753		TPM3;DKFZp686J1372	0.500104	0.378299
P62917;E9PP36;G3V1A1;E9PKZ0	60S ribosomal protein L8	RPL8	0.496897	1.47066
M0QXM9;O43615	Mitochondrial import inner membrane translocase subunit TIM44	TIMM44	0.482301	1.53067
Q14157;F8W726;Q5VU79;Q5VU78;Q5VU77;Q5VU81;Q5VU80;H0Y5H6	Ubiquitin-associated protein 2-like	UBAP2L	0.477111	-1.2977
F5H282;E7EQR6;P17987	T-complex protein 1 subunit alpha	TCP1	0.476003	-1.27828
A0A087WYG8;Q16352	Alpha-internexin	INA	0.473349	-2.54213
A0A087X0X3;P52272;M0R019;M0R2T0;M0R0Y6;M0QYQ7;M0R0N3;M0QY96;M0R2I7;M0QZM1	Heterogeneous nuclear ribonucleoprotein M	HNRNPM	0.469963	-0.49101
H0YEN5;E9PQD7;P15880	40S ribosomal protein S2	RPS2	0.462866	0.422304
P05187;A0A087X0P5;P10696;P09923	Alkaline phosphatase, placental type;Alkaline phosphatase;Alkaline phosphatase, placental-like	ALPP;ALPPL2	0.462192	-1.3488
O60832;C9IYT0;H7C2Q9;H7C0M1	H/ACA ribonucleoprotein complex subunit 4	DKC1	0.45852	-0.384247
B4DY09;Q12905	Interleukin enhancer-binding factor 2	ILF2	0.455395	-2.28439
D6RBQ1;D6RA04;D6RAY4;D6RFI3;E7EQR8;Q9GZM5	Protein YIPF3;Protein YIPF3, 36 kDa form III	YIPF3	0.453873	0.508636
A0A024R4M0;P46781	40S ribosomal protein S9	RPS9	0.451856	0.536391
A0A087WZ51;A0A087WYR3;O43399	Tumor protein D54	TPD52L2	0.448519	1.9769
F2Z2Y4;O00764	Pyridoxal kinase	PDXK	0.443971	-0.649696
Q9Y3F4	Serine-threonine kinase receptor-associated protein	STRAP	0.442765	-2.00686
Q14116	Interleukin-18	IL18	0.433636	0.464325
Q7Z4V5;A0A087WZ99;A0A087WX58;K7EPS6	Hepatoma-derived growth factor-related protein 2	HDGFRP2	0.429281	-0.531798
H0Y8X7;Q9Y678	Coatomer subunit gamma-1	COPG1	0.427609	-1.60672
E9PKE3;P11142;E9PN89;E9PNE6;P54652;A8K7Q2	Heat shock cognate 71 kDa protein;Heat shock-related 70 kDa protein 2	HSPA8;HSPA2	0.419512	-1.3464
Q8NC51	Plasminogen activator inhibitor 1 RNA-binding protein	SERBP1	0.401318	-0.881688
Q14126	Desmoglein-2	DSG2	0.39672	-1.26676
H0Y626;O95361	Tripartite motif-containing protein 16	TRIM16	0.394177	-0.641738
Q8IWE4	DCN1-like protein 3	DCUN1D3	0.383978	-0.197392
H7C1J2;H7C1M5;Q9H147	Deoxynucleotidyltransferase terminal-interacting protein 1	DNTTIP1	0.381333	0.394014
B0VJY8;A0A0G2JPW6;E7EWC7;A0A087WTE7;C9JMY0;A0A087WUE4;Q96PV6	Leukocyte receptor cluster member 8	LENG8	0.377217	0.567145
A0A087WTP3;Q92945;M0R0I5;M0QXW7;M0QYH3	Far upstream element-binding protein 2	KHSRP	0.373171	0.788529
A0A0G2JIW1;P0DMV9;P0DMV8;E9PN25;E9PPY6;E9PI65;E9PQQ4;E9PQK7;E9PK54;E9PLF4;V9GZ37;Q53FA3;P48741;P34931;P17066	Heat shock 70 kDa protein 1B;Heat shock 70 kDa protein 1A;Putative heat shock 70 kDa protein 7;Heat shock 70 kDa protein 1-like;Heat shock 70 kDa protein 6	HSPA1B;HSPA1A;HSPA8;HSPA7;HSPA1L;HSPA6	0.362469	0.315866
Q92522	Histone H1x	H1FX	0.360811	0.592283
P26038	Moesin	MSN	0.360482	0.774541
P62851	40S ribosomal protein S25	RPS25	0.354628	-1.33083
R4GN19;J3KQN4;Q969Q0;P83881	60S ribosomal protein L36a-like;60S ribosomal protein L36a	RPL36A;RPL36AL	0.339551	-1.53804
B1AP15;H3BLV0;B1AP13;H7BY55;P08174	Complement decay-accelerating factor	CD55	0.330837	-1.27048
P62899	60S ribosomal protein L31	RPL31	0.328288	-0.651795
Q9BYJ9;Q5JXC6;A0A024R7W5;A0A087WXZ3;A0A087X0Q1;A0A087WY31;Q9Y5A9;Q7Z739	YTH domain-containing family protein 1;YTH domain-containing family protein 2;YTH domain-containing family protein 3	YTHDF1;YTHDF3;YTHDF2	0.322801	0.947692
E7ESD5;E9PLN6;F2Z2Y1;O95677	Eyes absent homolog;Eyes absent homolog 4	EYA4	0.321692	1.03514
P20962	Parathymosin	PTMS	0.318721	1.04882
H0YH87;F8WB06;F8VQP2;V9GY86;Q99700;F8VRK6	Ataxin-2	ATXN2	0.3104	-0.87807
Q15056	Eukaryotic translation initiation factor 4H	EIF4H	0.307663	0.378443
O75822	Eukaryotic translation initiation factor 3 subunit J	EIF3J	0.305989	-0.784495
H0YL19;Q9GZS3	WD repeat-containing protein 61;WD repeat-containing protein 61, N-terminally processed	WDR61	0.300004	-1.18257
Q13428;J3KQ96;E7ETY2	Treacle protein	TCOF1	0.297482	1.16896
Q9UQ80;F8VR77	Proliferation-associated protein 2G4	PA2G4	0.297104	0.497704
Q08945;E9PPZ7;E9PMD4	FACT complex subunit SSRP1	SSRP1	0.295959	0.313234
A0A0D9SF20;K7EKJ7;P26599	Polypyrimidine tract-binding protein 1	PTBP1	0.287689	0.546813
Q05GC8;Q96PN7	Transcriptional-regulating factor 1	BCAR2;TRERF1	0.275803	0.326684
Q9UQ35;I3L3Q8;I3L1I8;I3L182;I3L4D8	Serine/arginine repetitive matrix protein 2	SRRM2	0.274795	0.325801
P62633;D6RAT4	Cellular nucleic acid-binding protein	CNBP	0.269192	0.833704
Q5T6W2;P61978;S4R457	Heterogeneous nuclear ribonucleoprotein K	HNRNPK	0.268273	0.364992
F1T0I1;J3KNL6;O15027;Q8N9G1;A0A0C4DH09;X6RGP5	Protein transport protein Sec16A	SEC16A	0.254262	-1.2199
O75400	Pre-mRNA-processing factor 40 homolog A	PRPF40A	0.242089	0.400456
Q9Y3B9	RRP15-like protein	RRP15	0.237448	0.947886
A1L2Z2;Q7Z406	Myosin-14	MYH14	0.232245	-0.585317
P61927	60S ribosomal protein L37	RPL37	0.22896	-1.11007
H3BNG6;H3BU94;H3BNE1;H3BR18;H3BM38;H3BPJ0;O00161	Synaptosomal-associated protein;Synaptosomal-associated protein 23	SNAP23	0.226787	0.433887
A0A0B4J220		C11orf98	0.225009	0.668155
Q9ULX6	A-kinase anchor protein 8-like	AKAP8L	0.223753	-0.861746
X6RAC9;A6NJH9;P47813;O14602	Eukaryotic translation initiation factor 1A, X-chromosomal;Eukaryotic translation initiation factor 1A, Y-chromosomal	EIF1AX;EIF1AY	0.213816	1.40927
G5E9G0;P39023	60S ribosomal protein L3	RPL3	0.2114	-0.659441
G3V2H6;G3V4M8;G3V5X6;G3V3K6;G3V251;B4DSU6;G3V555;G3V575;G3V576;G3V4W0;B4DY08;B2R5W2;G3V4C1;G3V2Q1;P07910	Heterogeneous nuclear ribonucleoproteins C1/C2	HNRNPC	0.203173	1.1169
P18124	60S ribosomal protein L7	RPL7	0.195038	-0.556246
E7ETK0;A0A087WUS0;P62847	40S ribosomal protein S24	RPS24	0.193909	0.707529
H0YDK9;H0YEN2;E9PQP7;H7BXH2;E9PKF6;Q5H9R7	Serine/threonine-protein phosphatase 6 regulatory subunit 3	PPP6R3	0.155777	-0.30526
Q03111	Protein ENL	MLLT1	0.152868	0.501756
B8ZZQ6;P06454;B8ZZA1;A0A087WUT1;B8ZZW7;H7C2N1	Prothymosin alpha;Prothymosin alpha, N-terminally processed;Thymosin alpha-1	PTMA	0.151027	-0.211232
C9JKI3	Caveolin	CAV1	0.146229	0.258097
Q9Y3D3	28S ribosomal protein S16, mitochondrial	MRPS16	0.142569	-0.555298
H7C4B7;Q3LIE7;Q15392	Delta(24)-sterol reductase	DHCR24;Nbla03646	0.140785	-0.673816
Q8TAE8	Growth arrest and DNA damage-inducible proteins-interacting protein 1	GADD45GIP1	0.138874	0.0867176
Q8WUA2	Peptidyl-prolyl cis-trans isomerase-like 4	PPIL4	0.135193	-0.330483
Q5H8X8;O95399	Urotensin-2	UTS2	0.125998	-0.451179
A0A0D9SFY5;A0A0D9SFE5;E9PBF6;P20700	Lamin-B1	LMNB1	0.122131	0.161136
J3KTA4;P17844;J3QSF1;J3QR02;J3KRX8;J3KRZ1;J3QRQ7	Probable ATP-dependent RNA helicase DDX5	DDX5	0.114683	-0.759246
H3BLZ8;Q92841	Probable ATP-dependent RNA helicase DDX17	DDX17	0.112613	0.423011
E9PCY7;G8JLB6;P31943;H0YB39;E7EN40;D6RIU0;H0YBG7;H0YBD7;D6RBM0;D6RDL0;E5RGH4;E7EQJ0;D6RAM1;E5RGV0;D6R9T0;D6RFM3;D6RIT2;D6RDU3;D6RJ04;D6RIH9	Heterogeneous nuclear ribonucleoprotein H;Heterogeneous nuclear ribonucleoprotein H, N-terminally processed	HNRNPH1	0.110978	-0.0884233
P39687	Acidic leucine-rich nuclear phosphoprotein 32 family member A	ANP32A	0.109948	-0.784901
Q8NDC0	MAPK-interacting and spindle-stabilizing protein-like	MAPK1IP1L	0.105066	-0.587041
H0YDS9;H0YF33;Q5T624;P49321	Nuclear autoantigenic sperm protein	NASP	0.100819	-0.189924
A0A087X1M7;A0A087WWU4;A0A087WY29;Q8IXW7;A0A087WXI3;G8JLE9;R9WNI0;A8MQB8;G3V0J0;Q06787	Fragile X mental retardation protein 1	FMR1	0.100451	-0.10464
O75607	Nucleoplasmin-3	NPM3	0.0997837	0.317217
J3KTK5;Q9NWA0	Mediator of RNA polymerase II transcription subunit 9	MED9	0.0958571	-0.360468
K7EQZ3;Q9GZP8	Immortalization up-regulated protein	IMUP	0.0915823	-0.570016
H0Y5F5;H0YEU6;B1ANR0;Q13310;H0YER0;H0Y6X6;P0CB38	Polyadenylate-binding protein;Polyadenylate-binding protein 4	PABPC4	0.0887091	0.125975
E9PIR3;Q9Y5J9	Mitochondrial import inner membrane translocase subunit Tim8 B	TIMM8B	0.079716	-0.131641
K7EMA7;H7BY10;K7ERT8;A8MUS3;P62750;K7EJV9	60S ribosomal protein L23a	RPL23A	0.0794999	0.336738
A0A087WX59;Q16186	Proteasomal ubiquitin receptor ADRM1	ADRM1	0.0717481	0.229558
E7EX73;E9PGM1;E7EUU4;Q04637;H7C044;A0A0A0MR52;C9JWH7;C9J556;C9JSU8;H7C0V6;C9JWW9;C9J6B6;C9J2Z7;C9K073;C9JF13	Eukaryotic translation initiation factor 4 gamma 1	EIF4G1	0.071326	-0.340338
K7ERI7;P35268	60S ribosomal protein L22	RPL22	0.0666502	0.19771
A0A0C4DG94;Q9Y2G3	Probable phospholipid-transporting ATPase IF	ATP11B	0.0590874	-0.231749
D6RA73;D6RJI2;P38646	Stress-70 protein, mitochondrial	HSPA9	0.0588522	-0.242783
Q99436	Proteasome subunit beta type-7	PSMB7	0.0583227	-0.343762
A0A087X1S2;H0Y449;P67809;Q9Y2T7	Nuclease-sensitive element-binding protein 1	YBX1	0.0582599	-0.10105
Q07666;E5RG12;H0YAQ1;H0YAQ3;E5RJZ9;Q5STV6;A0A0A0MRT5;O75525;Q5VWX1;Q9UBC1	KH domain-containing, RNA-binding, signal transduction-associated protein 1	KHDRBS1	0.0513924	0.398296
A0A087WTT1;E7EQV3;E7ERJ7;Q9H361;P11940;H0YAR2;H0YAP2;H0YC10;H0YAS7;H0YB86;H0YAS6;H0YB75;Q4VXU2	Polyadenylate-binding protein;Polyadenylate-binding protein 3;Polyadenylate-binding protein 1	PABPC1;PABPC3	0.0504301	-0.0358224
E9PDF6;O43795	Unconventional myosin-Ib	MYO1B	0.0503861	-0.217233
Q3MHD2;K7ELG9	Protein LSM12 homolog	LSM12	0.0438505	0.145951
Q5JR95;P62241	40S ribosomal protein S8	RPS8	0.0432879	0.238086
Q9BYK2;Q8WVC2;Q9BYK1;P63220	40S ribosomal protein S21	RPS21	0.0402196	0.0990686
P04792;C9J3N8	Heat shock protein beta-1	HSPB1	0.0367233	-0.0598021
P25205	DNA replication licensing factor MCM3	MCM3	0.03379	0.053153
Q96J85;F8VXL0;E5RJH8;F8VSA9;F8VZ60;E5RHZ8;F8W1I4;Q8TBL5;A0A087WTL9;X6RLN4;Q71RC2	La-related protein 4	LARP4	0.032114	-0.0437241
Q9NX76	CKLF-like MARVEL transmembrane domain-containing protein 6	CMTM6	0.0277597	0.0664387
F8W727;P62910	60S ribosomal protein L32	RPL32	0.0276497	-0.166252
Q5JSZ5;H0Y412	Protein PRRC2B	PRRC2B	0.0271576	-0.0992656
H0YAA0;B7Z645		SYNCRIP	0.024279	0.0610199
P26641	Elongation factor 1-gamma	EEF1G	0.0200414	0.0592036
P51114;B4DXZ6;C9JAJ4;E9PFF5;C9JYQ6;E7EU85	Fragile X mental retardation syndrome-related protein 1	FXR1	0.0175769	-0.0193815
H0YLW0;P37108	Signal recognition particle 14 kDa protein	SRP14	0.0153967	0.0229516
Q13895	Bystin	BYSL	0.0133306	-0.0103207
P05783;F8VZY9;C9JM50;CON__P08727;CON__P19001;CON__P05784;P08727;K7EMD9;K7EPJ9;F5GWP8;K7ERE3;CON__ENSEMBL:ENSP00000377550;CON__Q92764;C4AM86;CON__Q04695;CON__Q9QWL7;CON__P08730-1;CON__Q6IFX2;CON__A2AB72;CON__P19012;CON__O76015;CON__O76013;CON__O76014;CON__Q2M2I5;Q04695;O76014;Q92764;P19012;O76015;P13646;O76013;Q2M2I5	Keratin, type I cytoskeletal 18	KRT18	0.0071865	-0.0369892
E5RGA2;P60228;E5RIT4;H0YAW4;H0YBR5	Eukaryotic translation initiation factor 3 subunit E	EIF3E	0.00710536	-0.0177536
I1E4Y6;Q6Y7W6;C9JH18	PERQ amino acid-rich with GYF domain-containing protein 2	GIGYF2	0.0058185	-0.0197153

## Sheet: B-Raf mRNA
Protein IDs	Protein names	Gene names	p-value (RNA over BG)	Enrichment RNA over BG
F6WST4;A0A0K0K1C5;Q9P0S3;Q53FV1	ORM1-like protein 1;ORM1-like protein 2	ORMDL1;ORMDL2	1.73148	2.28014
M0R0Z0;X6R2L4;Q9Y230	RuvB-like 2	RUVBL2	1.35307	-0.971549
P23246;H0Y9K7;H0Y9U2;C9IZL7;H7C367;Q15233	Splicing factor, proline- and glutamine-rich	SFPQ	2.93997	5.52561
A0A087WZ51;A0A087WYR3;O43399	Tumor protein D54	TPD52L2	1.42305	3.99262
A0A0B4J220		C11orf98	1.44245	1.69199
H0YAA0;B7Z645		SYNCRIP	2.24768	-0.813995
E9PKE3;P11142;E9PN89;E9PNE6;P54652;A8K7Q2	Heat shock cognate 71 kDa protein;Heat shock-related 70 kDa protein 2	HSPA8;HSPA2	1.32224	-0.506819
O43823	A-kinase anchor protein 8	AKAP8	1.39274	1.1632
P62269	40S ribosomal protein S18	RPS18	1.30511	-1.1045
A0A0D9SFB3;A0A0D9SG12;A0A0D9SF53;O00571;O15523;A0A087WX09;A0A087WVZ1;B4DLA0;A0A0J9YVQ7;D6RCM4;Q9NQI0	ATP-dependent RNA helicase DDX3X;ATP-dependent RNA helicase DDX3Y	DDX3X;DDX3Y	0.526489	-1.50822
B0QY90;B0QY89;Q9Y262	Eukaryotic translation initiation factor 3 subunit L	EIF3L	0.484473	-0.872055
C9JG35;C9J092;C9JCJ0;Q96K58	Zinc finger protein 668	ZNF668	0.394506	0.268651
C9JUE0;C9JJP5;Q05BK6;Q92734	Protein TFG	TFG	0.47763	0.933328
D6RC37;D6R970;P53999	Activated RNA polymerase II transcriptional coactivator p15	SUB1	0.251226	0.459229
E9PJD9;E9PLX7;P46776	60S ribosomal protein L27a	RPL27A	0.212519	0.23007
H0YJB9;G3V4C6;Q9Y224	UPF0568 protein C14orf166	C14orf166	1.06553	2.53806
G5E9Z2;Q96KA5	Cleft lip and palate transmembrane protein 1-like protein	CLPTM1L	1.04912	-0.98351
H3BUF6;Q8WWM7;H3BSK9	Ataxin-2-like protein	ATXN2L	0.887138	-1.39236
H7BZJ3		PDIA3	0.709155	-1.24839
J3KS31;J3QRS9;X6R4W8;O43670	BUB3-interacting and GLEBS motif-containing protein ZNF207	ZNF207	0.243598	-0.52479
O60927	Protein phosphatase 1 regulatory subunit 11	PPP1R11	0.362505	0.268268
P09629	Homeobox protein Hox-B7	HOXB7	1.16058	-1.9508
P16989;A0A0D9SEI8	Y-box-binding protein 3	YBX3	0.470078	-0.26538
P31942	Heterogeneous nuclear ribonucleoprotein H3	HNRNPH3	0.463336	-1.6969
P35580	Myosin-10	MYH10	0.137974	-0.224884
Q5HY57;P50402	Emerin	EMD	0.160747	0.522716
P55060	Exportin-2	CSE1L	0.698711	-1.45388
P55735	Protein SEC13 homolog	SEC13	0.221626	0.832619
Q01085	Nucleolysin TIAR	TIAL1	0.781945	-1.9303
Q09666	Neuroblast differentiation-associated protein AHNAK	AHNAK	0.02442	0.0474305
Q15427	Splicing factor 3B subunit 4	SF3B4	0.793258	1.81443
Q9H0L4	Cleavage stimulation factor subunit 2 tau variant	CSTF2T	0.213185	-1.02679
Q9H1E3	Nuclear ubiquitous casein and cyclin-dependent kinase substrate 1	NUCKS1	0.205683	-0.999578
Q9NSE4	Isoleucine--tRNA ligase, mitochondrial	IARS2	1.10499	-0.483882
Q9Y2W1	Thyroid hormone receptor-associated protein 3	THRAP3	0.403345	-0.847456
A0A024R4M0;P46781	40S ribosomal protein S9	RPS9	0.391136	0.411044
A0A075B7F4;Q92804;A0A075B7C1	TATA-binding protein-associated factor 2N	TAF15	0.736119	1.65342
B0VJY8;A0A0G2JPW6;E7EWC7;A0A087WTE7;C9JMY0;A0A087WUE4;Q96PV6	Leukocyte receptor cluster member 8	LENG8	0.314437	0.63806
A0A087WTP3;Q92945;M0R0I5;M0QXW7;M0QYH3	Far upstream element-binding protein 2	KHSRP	1.15722	2.69768
A0A087WTT1;E7EQV3;E7ERJ7;Q9H361;P11940;H0YAR2;H0YAP2;H0YC10;H0YAS7;H0YB86;H0YAS6;H0YB75;Q4VXU2	Polyadenylate-binding protein;Polyadenylate-binding protein 3;Polyadenylate-binding protein 1	PABPC1;PABPC3	0.220899	-0.125482
A0A087WU03		HNRNPDL	0.46931	0.430221
E7ETK0;A0A087WUS0;P62847	40S ribosomal protein S24	RPS24	0.0575379	0.277841
A0A087X1M7;A0A087WWU4;A0A087WY29;Q8IXW7;A0A087WXI3;G8JLE9;R9WNI0;A8MQB8;G3V0J0;Q06787	Fragile X mental retardation protein 1	FMR1	0.109315	-0.140845
Q5VU61;A0A087WWU8;Q5HYB6;J3KN67;K7EPV9;K7EMU5;K7EP68;K7ERG3;K7ENT6;P67936;P06753		TPM3;DKFZp686J1372	0.0365286	0.0326281
A0A087WX59;Q16186	Proteasomal ubiquitin receptor ADRM1	ADRM1	0.497392	1.19991
A0A087WYG8;Q16352	Alpha-internexin	INA	0.180061	-0.990345
A0A087X0X3;P52272;M0R019;M0R2T0;M0R0Y6;M0QYQ7;M0R0N3;M0QY96;M0R2I7;M0QZM1	Heterogeneous nuclear ribonucleoprotein M	HNRNPM	0.207641	-0.147275
A0A087X1S2;H0Y449;P67809;Q9Y2T7	Nuclease-sensitive element-binding protein 1	YBX1	0.494759	0.370588
F1T0B3;A0A087X2G1;Q92499	ATP-dependent RNA helicase DDX1	DDX1	1.12119	-4.75757
M0R3F1;A0A0A0MRA5;B7Z4B8;Q9BUJ2;M0QYM5;M0QYI8;M0QYZ0	Heterogeneous nuclear ribonucleoprotein U-like protein 1	HNRNPUL1	0.296317	-0.82106
A0A0C4DFQ1;A0A0A0MRK6;Q13505	Metaxin-1	MTX1	0.414347	0.662109
A0A0A0MRM9;Q14978;S4R349	Nucleolar and coiled-body phosphoprotein 1	NOLC1	0.413346	-0.573048
A0A0B4J213;A0A0C4DH44;P62888;E5RI99	60S ribosomal protein L30	RPL30	0.509784	2.36381
A0A0C4DG94;Q9Y2G3	Probable phospholipid-transporting ATPase IF	ATP11B	0.100478	0.414383
A0A0D9SF20;K7EKJ7;P26599	Polypyrimidine tract-binding protein 1	PTBP1	0.163518	-0.298644
A0A0D9SFY5;A0A0D9SFE5;E9PBF6;P20700	Lamin-B1	LMNB1	0.501963	-0.38059
H7BY36;A0A0D9SFL3;B0QYK0;C9JGE3;Q01844	RNA-binding protein EWS	EWSR1	0.353105	0.566245
A0A0G2JIW1;P0DMV9;P0DMV8;E9PN25;E9PPY6;E9PI65;E9PQQ4;E9PQK7;E9PK54;E9PLF4;V9GZ37;Q53FA3;P48741;P34931;P17066	Heat shock 70 kDa protein 1B;Heat shock 70 kDa protein 1A;Putative heat shock 70 kDa protein 7;Heat shock 70 kDa protein 1-like;Heat shock 70 kDa protein 6	HSPA1B;HSPA1A;HSPA8;HSPA7;HSPA1L;HSPA6	0.0695068	0.0764213
D6RCT1;D6RBP6;D6RA49;D6RFL5;D6R9M7;D6REZ6;D6RBS9;D6R9D6;A0AV96	RNA-binding protein 47	RBM47	0.175882	0.154502
A1KXE4	Myelin-associated neurite-outgrowth inhibitor	FAM168B	0.286909	-0.557182
A1L2Z2;Q7Z406	Myosin-14	MYH14	0.435739	-1.07534
X6RAC9;A6NJH9;P47813;O14602	Eukaryotic translation initiation factor 1A, X-chromosomal;Eukaryotic translation initiation factor 1A, Y-chromosomal	EIF1AX;EIF1AY	0.486008	2.47878
K7EMA7;H7BY10;K7ERT8;A8MUS3;P62750;K7EJV9	60S ribosomal protein L23a	RPL23A	0.942893	-2.01201
B1AP15;H3BLV0;B1AP13;H7BY55;P08174	Complement decay-accelerating factor	CD55	0.118142	0.382824
G3V2H6;G3V4M8;G3V5X6;G3V3K6;G3V251;B4DSU6;G3V555;G3V575;G3V576;G3V4W0;B4DY08;B2R5W2;G3V4C1;G3V2Q1;P07910	Heterogeneous nuclear ribonucleoproteins C1/C2	HNRNPC	0.840701	2.41677
B4DY09;Q12905	Interleukin enhancer-binding factor 2	ILF2	0.913502	4.40142
B8ZZQ6;P06454;B8ZZA1;A0A087WUT1;B8ZZW7;H7C2N1	Prothymosin alpha;Prothymosin alpha, N-terminally processed;Thymosin alpha-1	PTMA	0.122198	0.144171
C9JKI3	Caveolin	CAV1	0.0225778	0.0422368
C9JTN7;F8W8I6;P31483	Nucleolysin TIA-1 isoform p40	TIA1	0.177222	-0.816696
D6R9B6;H0Y9Y4;D6RAT0;P61247	40S ribosomal protein S3a	RPS3A	0.0362751	-0.0367899
D6RBQ1;D6RA04;D6RAY4;D6RFI3;E7EQR8;Q9GZM5	Protein YIPF3;Protein YIPF3, 36 kDa form III	YIPF3	0.13958	-0.395634
D6RA73;D6RJI2;P38646	Stress-70 protein, mitochondrial	HSPA9	0.0225769	0.103477
D6RHC4;E9PDP5;Q8IWZ3	Ankyrin repeat and KH domain-containing protein 1	ANKHD1	0.751705	1.67045
E5RGA2;P60228;E5RIT4;H0YAW4;H0YBR5	Eukaryotic translation initiation factor 3 subunit E	EIF3E	0.0344454	0.0922737
E7EPN9;Q9Y520;H7C5N8;A0A0A0MS30	Protein PRRC2C	PRRC2C	0.557662	0.809327
F5H282;E7EQR6;P17987	T-complex protein 1 subunit alpha	TCP1	0.430313	1.03321
S4R3H4;E7EQT4;Q9UKV3;A0A087WYN3;G3V3B0	Apoptotic chromatin condensation inducer in the nucleus	ACIN1	0.552547	-0.664864
E7ESD5;E9PLN6;F2Z2Y1;O95677	Eyes absent homolog;Eyes absent homolog 4	EYA4	0.0557784	-0.278078
E7EX73;E9PGM1;E7EUU4;Q04637;H7C044;A0A0A0MR52;C9JWH7;C9J556;C9JSU8;H7C0V6;C9JWW9;C9J6B6;C9J2Z7;C9K073;C9JF13	Eukaryotic translation initiation factor 4 gamma 1	EIF4G1	0.0216244	-0.114679
E9PCY7;G8JLB6;P31943;H0YB39;E7EN40;D6RIU0;H0YBG7;H0YBD7;D6RBM0;D6RDL0;E5RGH4;E7EQJ0;D6RAM1;E5RGV0;D6R9T0;D6RFM3;D6RIT2;D6RDU3;D6RJ04;D6RIH9	Heterogeneous nuclear ribonucleoprotein H;Heterogeneous nuclear ribonucleoprotein H, N-terminally processed	HNRNPH1	0.37884	-0.485782
E9PDF6;O43795	Unconventional myosin-Ib	MYO1B	0.495201	-2.12736
E9PIR3;Q9Y5J9	Mitochondrial import inner membrane translocase subunit Tim8 B	TIMM8B	0.0644929	0.0956302
E9PJA7;E9PK09;E9PQN2;E9PKI6;E9PK91;Q9NYF8	Bcl-2-associated transcription factor 1	BCLAF1	0.122557	0.280763
H0YDK9;H0YEN2;E9PQP7;H7BXH2;E9PKF6;Q5H9R7	Serine/threonine-protein phosphatase 6 regulatory subunit 3	PPP6R3	0.0274935	0.0326896
E9PMM2;E9PKP7;P17480	Nucleolar transcription factor 1	UBTF	0.447314	0.914405
E9PPU1;H0YEU2;E9PL09;P23396;E9PQ96;E9PJH4;F2Z2S8;H0YF32;E9PK82;H0YCJ7	40S ribosomal protein S3	RPS3	0.459701	0.964187
E9PLA9;Q14444	Caprin-1	CAPRIN1	0.820551	-2.11278
H0YEN5;E9PQD7;P15880	40S ribosomal protein S2	RPS2	0.605752	0.406447
F1T0I1;J3KNL6;O15027;Q8N9G1;A0A0C4DH09;X6RGP5	Protein transport protein Sec16A	SEC16A	0.119572	0.426338
F2Z2Y4;O00764	Pyridoxal kinase	PDXK	0.0874956	-0.175171
F5H2U4;Q5T6F2	Ubiquitin-associated protein 2	UBAP2	0.376444	0.663644
H0YH87;F8WB06;F8VQP2;V9GY86;Q99700;F8VRK6	Ataxin-2	ATXN2	0.192003	0.254987
F8W667;F8VV04;Q15020	Squamous cell carcinoma antigen recognized by T-cells 3	SART3	0.22496	-0.172169
F8W727;P62910	60S ribosomal protein L32	RPL32	1.0407	0.509282
G5E9G0;P39023	60S ribosomal protein L3	RPL3	0.553368	0.598649
H0Y5F5;H0YEU6;B1ANR0;Q13310;H0YER0;H0Y6X6;P0CB38	Polyadenylate-binding protein;Polyadenylate-binding protein 4	PABPC4	0.0838729	0.17742
H0Y626;O95361	Tripartite motif-containing protein 16	TRIM16	0.252779	-0.548409
H0Y8X7;Q9Y678	Coatomer subunit gamma-1	COPG1	0.372375	-0.593561
H0YA93;Q86UW6	NEDD4-binding protein 2	N4BP2	0.00704562	0.0290303
H0YDS9;H0YF33;Q5T624;P49321	Nuclear autoantigenic sperm protein	NASP	0.134135	-0.194543
H0YDU9;Q14677	Clathrin interactor 1	CLINT1	0.945164	1.45735
H0YL19;Q9GZS3	WD repeat-containing protein 61;WD repeat-containing protein 61, N-terminally processed	WDR61	0.322784	-1.41222
H0YLW0;P37108	Signal recognition particle 14 kDa protein	SRP14	0.134959	0.153092
H3BLZ8;Q92841	Probable ATP-dependent RNA helicase DDX17	DDX17	0.113647	0.229265
H3BNG6;H3BU94;H3BNE1;H3BR18;H3BM38;H3BPJ0;O00161	Synaptosomal-associated protein;Synaptosomal-associated protein 23	SNAP23	0.0728163	-0.139265
H7C1J2;H7C1M5;Q9H147	Deoxynucleotidyltransferase terminal-interacting protein 1	DNTTIP1	0.165112	0.25558
H7C3A1;Q9BXP5	Serrate RNA effector molecule homolog	SRRT	0.0411895	-0.205352
H7C4B7;Q3LIE7;Q15392	Delta(24)-sterol reductase	DHCR24;Nbla03646	0.080666	0.464919
I1E4Y6;Q6Y7W6;C9JH18	PERQ amino acid-rich with GYF domain-containing protein 2	GIGYF2	0.356007	1.02473
R4GN19;J3KQN4;Q969Q0;P83881	60S ribosomal protein L36a-like;60S ribosomal protein L36a	RPL36A;RPL36AL	0.346965	1.47843
J3KS98;P26373	60S ribosomal protein L13	RPL13	0.367352	1.30752
J3KTA4;P17844;J3QSF1;J3QR02;J3KRX8;J3KRZ1;J3QRQ7	Probable ATP-dependent RNA helicase DDX5	DDX5	0.429069	1.75715
J3KTK5;Q9NWA0	Mediator of RNA polymerase II transcription subunit 9	MED9	0.11619	0.18912
K7EQZ3;Q9GZP8	Immortalization up-regulated protein	IMUP	0.599151	1.86286
K7ERI7;P35268	60S ribosomal protein L22	RPL22	0.547994	-1.18787
M0QXD6;P35269	General transcription factor IIF subunit 1	GTF2F1	0.307053	1.00065
M0QXM9;O43615	Mitochondrial import inner membrane translocase subunit TIM44	TIMM44	0.293213	1.09265
M0R1H6;M0QZC5;P62280	40S ribosomal protein S11	RPS11	0.973694	2.00604
O15355	Protein phosphatase 1G	PPM1G	0.265887	-0.865952
Q5H919;Q5H918;O43719	HIV Tat-specific factor 1	HTATSF1	0.0983007	-0.456128
O60832;C9IYT0;H7C2Q9;H7C0M1	H/ACA ribonucleoprotein complex subunit 4	DKC1	0.281677	-0.184071
O75179;H0YLQ3;H0YM23	Ankyrin repeat domain-containing protein 17	ANKRD17	0.540421	1.79942
O75342	Arachidonate 12-lipoxygenase, 12R-type	ALOX12B	1.01925	-2.39991
O75400	Pre-mRNA-processing factor 40 homolog A	PRPF40A	0.0789199	-0.127191
O75607	Nucleoplasmin-3	NPM3	0.252134	0.741637
O75822	Eukaryotic translation initiation factor 3 subunit J	EIF3J	0.209901	-0.682693
Q5H8X8;O95399	Urotensin-2	UTS2	0.329897	0.518919
P04792;C9J3N8	Heat shock protein beta-1	HSPB1	0.260129	0.35871
P05187;A0A087X0P5;P10696;P09923	Alkaline phosphatase, placental type;Alkaline phosphatase;Alkaline phosphatase, placental-like	ALPP;ALPPL2	0.261537	-0.604246
P05198	Eukaryotic translation initiation factor 2 subunit 1	EIF2S1	0.0297939	-0.0273662
P05783;F8VZY9;C9JM50;CON__P08727;CON__P19001;CON__P05784;P08727;K7EMD9;K7EPJ9;F5GWP8;K7ERE3;CON__ENSEMBL:ENSP00000377550;CON__Q92764;C4AM86;CON__Q04695;CON__Q9QWL7;CON__P08730-1;CON__Q6IFX2;CON__A2AB72;CON__P19012;CON__O76015;CON__O76013;CON__O76014;CON__Q2M2I5;Q04695;O76014;Q92764;P19012;O76015;P13646;O76013;Q2M2I5	Keratin, type I cytoskeletal 18	KRT18	0.0987191	-0.440941
P08621	U1 small nuclear ribonucleoprotein 70 kDa	SNRNP70	0.326673	-0.113639
P08670	Vimentin	VIM	0.113835	-0.198979
P11021	78 kDa glucose-regulated protein	HSPA5	0.28094	-0.330583
P13489;E9PMJ3;E9PLZ3;E9PIM9;E9PMA9;E9PMN0;E9PIK5;H0YCR7;E9PR82;E9PMI1	Ribonuclease inhibitor	RNH1	0.0748049	-0.145998
P18124	60S ribosomal protein L7	RPL7	0.0967737	0.37602
P19338;H7BY16;C9JYW2;C9JLB1;C9J1H7;C9JWL1	Nucleolin	NCL	0.841999	-0.626167
P20962	Parathymosin	PTMS	0.476556	-1.68255
P22626;A0A087WUI2	Heterogeneous nuclear ribonucleoproteins A2/B1	HNRNPA2B1	0.0594483	-0.201371
P25205	DNA replication licensing factor MCM3	MCM3	0.0235866	0.0503235
P26038	Moesin	MSN	0.359849	0.615708
P26196	Probable ATP-dependent RNA helicase DDX6	DDX6	0.262205	1.1411
P26368	Splicing factor U2AF 65 kDa subunit	U2AF2	0.451594	0.60935
P26641	Elongation factor 1-gamma	EEF1G	0.0174432	0.0597949
P30050	60S ribosomal protein L12	RPL12	0.388154	0.822017
P35579;B1PS43;P35749;A0A0C4DFM8	Myosin-9	MYH9	0.129804	-0.158497
P39687	Acidic leucine-rich nuclear phosphoprotein 32 family member A	ANP32A	0.328017	-1.89902
P51114;B4DXZ6;C9JAJ4;E9PFF5;C9JYQ6;E7EU85	Fragile X mental retardation syndrome-related protein 1	FXR1	0.165478	-0.125979
P51116;I3L1Z2	Fragile X mental retardation syndrome-related protein 2	FXR2	1.15513	1.68607
P52597	Heterogeneous nuclear ribonucleoprotein F;Heterogeneous nuclear ribonucleoprotein F, N-terminally processed	HNRNPF	0.503182	-0.322614
P55884;C9JZG1	Eukaryotic translation initiation factor 3 subunit B	EIF3B	0.166226	-0.181028
P60709;G5E9R0;E7EVS6;C9JTX5;C9JZR7;P63267;P68133;P68032;P62736;C9JUM1;F8WB63;B8ZZJ2;C9JFL5;F6UVQ4;F6QUT6;A6NL76;Q6S8J3;A5A3E0;F8WCH0;Q9BYX7;Q562R1;P0CG39;P0CG38	Actin, cytoplasmic 1;Actin, cytoplasmic 1, N-terminally processed;Actin, gamma-enteric smooth muscle;Actin, alpha skeletal muscle;Actin, alpha cardiac muscle 1;Actin, aortic smooth muscle	ACTB;ACTG2;ACTA1;ACTC1;ACTA2	1.04908	1.75624
P61254	60S ribosomal protein L26	RPL26	0.260387	-0.247846
P61927	60S ribosomal protein L37	RPL37	0.00404756	-0.016273
V9GYQ5;V9GZ59;P61964	WD repeat-containing protein 5	WDR5	1.1324	2.52169
Q5JR95;P62241	40S ribosomal protein S8	RPS8	0.150696	-0.138026
P62306	Small nuclear ribonucleoprotein F	SNRPF	0.0789717	-0.254823
P62633;D6RAT4	Cellular nucleic acid-binding protein	CNBP	0.297353	0.877607
P62851	40S ribosomal protein S25	RPS25	0.0298681	0.051847
P62899	60S ribosomal protein L31	RPL31	0.0104245	-0.0249014
P62917;E9PP36;G3V1A1;E9PKZ0	60S ribosomal protein L8	RPL8	0.514383	1.55652
Q9BYK2;Q8WVC2;Q9BYK1;P63220	40S ribosomal protein S21	RPS21	0.854959	-0.781319
P63261;K7EM38;I3L3R2;J3KT65;I3L3I0;I3L1U9;I3L4N8	Actin, cytoplasmic 2;Actin, cytoplasmic 2, N-terminally processed	ACTG1	0.551459	-0.342487
Q71U36;P68363;F8VRZ4;F8VS66;F8VQQ4;F8VVB9;F5H5D3;Q9BQE3;F8VRK0;F8VX09;F8VWV9;F8VXZ7;F8W0F6;Q6PEY2;Q13748	Tubulin alpha-1A chain;Tubulin alpha-1B chain;Tubulin alpha-1C chain	TUBA1A;TUBA1B;TUBA1C	0.381056	0.474136
P78344	Eukaryotic translation initiation factor 4 gamma 2	EIF4G2	0.542717	0.712917
P80723;U3KQP0	Brain acid soluble protein 1	BASP1	0.0315018	-0.0430427
Q00839	Heterogeneous nuclear ribonucleoprotein U	HNRNPU	0.256587	1.07135
Q03111	Protein ENL	MLLT1	0.0486216	0.154588
Q04941	Proteolipid protein 2	PLP2	0.18392	-0.611066
Q05GC8;Q96PN7	Transcriptional-regulating factor 1	BCAR2;TRERF1	0.139963	-0.0735459
Q07666;E5RG12;H0YAQ1;H0YAQ3;E5RJZ9;Q5STV6;A0A0A0MRT5;O75525;Q5VWX1;Q9UBC1	KH domain-containing, RNA-binding, signal transduction-associated protein 1	KHDRBS1	0.266229	1.64088
Q08945;E9PPZ7;E9PMD4	FACT complex subunit SSRP1	SSRP1	0.133171	-0.151318
Q12906	Interleukin enhancer-binding factor 3	ILF3	0.268323	-0.578182
Q13283	Ras GTPase-activating protein-binding protein 1	G3BP1	1.07905	1.04269
Q13428;J3KQ96;E7ETY2	Treacle protein	TCOF1	0.0485336	-0.292605
Q13895	Bystin	BYSL	0.251208	-0.226126
Q14011	Cold-inducible RNA-binding protein	CIRBP	0.699563	-1.24662
Q14116	Interleukin-18	IL18	0.452173	-0.177152
Q14126	Desmoglein-2	DSG2	0.0857989	-0.174715
Q14157;F8W726;Q5VU79;Q5VU78;Q5VU77;Q5VU81;Q5VU80;H0Y5H6	Ubiquitin-associated protein 2-like	UBAP2L	0.244742	-0.942958
Q14694;H3BQC6;H3BNA1	Ubiquitin carboxyl-terminal hydrolase 10	USP10	0.151746	-0.486391
Q14847	LIM and SH3 domain protein 1	LASP1	0.0496859	-0.109772
Q15056	Eukaryotic translation initiation factor 4H	EIF4H	0.0139492	0.0141616
Q2M1V0	Intestine-specific homeobox	ISX	0.474325	0.744197
Q3MHD2;K7ELG9	Protein LSM12 homolog	LSM12	0.0467882	-0.172337
Q5H909;Q9UNF1	Melanoma-associated antigen D2	MAGED2	0.177053	-0.192745
Q5JSZ5;H0Y412	Protein PRRC2B	PRRC2B	0.301263	0.532436
Q5T6W2;P61978;S4R457	Heterogeneous nuclear ribonucleoprotein K	HNRNPK	0.605349	0.601409
Q6UN15;H0Y8P7;A0A0B4J203	Pre-mRNA 3-end-processing factor FIP1	FIP1L1	0.495204	0.995389
Q7Z417	Nuclear fragile X mental retardation-interacting protein 2	NUFIP2	0.0709291	0.133712
Q7Z4V5;A0A087WZ99;A0A087WX58;K7EPS6	Hepatoma-derived growth factor-related protein 2	HDGFRP2	0.0240564	-0.0228834
Q8IWE4	DCN1-like protein 3	DCUN1D3	5.04147e-05	-5.81741e-05
Q8N7H5;M0QYC7	RNA polymerase II-associated factor 1 homolog	PAF1	0.0116989	0.0494103
Q8NBJ5	Procollagen galactosyltransferase 1	COLGALT1	0.515576	-1.43959
Q8NC51	Plasminogen activator inhibitor 1 RNA-binding protein	SERBP1	0.543555	-1.03291
Q8NDC0	MAPK-interacting and spindle-stabilizing protein-like	MAPK1IP1L	0.200958	-0.828194
Q8NDV7	Trinucleotide repeat-containing gene 6A protein	TNRC6A	0.494156	-1.23474
Q8TAE8	Growth arrest and DNA damage-inducible proteins-interacting protein 1	GADD45GIP1	0.273329	0.221657
Q8TF01	Arginine/serine-rich protein PNISR	PNISR	0.318538	-0.596723
Q8WUA2	Peptidyl-prolyl cis-trans isomerase-like 4	PPIL4	0.1604	-0.391974
Q8WVC0	RNA polymerase-associated protein LEO1	LEO1	0.360804	-0.564269
Q92522	Histone H1x	H1FX	0.953953	0.96542
Q92900	Regulator of nonsense transcripts 1	UPF1	0.296284	-0.369318
Q92908	Transcription factor GATA-6	GATA6	1.01302	-1.78291
Q96J85;F8VXL0;E5RJH8;F8VSA9;F8VZ60;E5RHZ8;F8W1I4;Q8TBL5;A0A087WTL9;X6RLN4;Q71RC2	La-related protein 4	LARP4	0.7253	-0.748435
Q99436	Proteasome subunit beta type-7	PSMB7	0.0232749	0.10831
Q9BYJ9;Q5JXC6;A0A024R7W5;A0A087WXZ3;A0A087X0Q1;A0A087WY31;Q9Y5A9;Q7Z739	YTH domain-containing family protein 1;YTH domain-containing family protein 2;YTH domain-containing family protein 3	YTHDF1;YTHDF3;YTHDF2	0.0444373	0.152957
Q9H112	Cystatin-11	CST11	0.185325	-0.418766
Q9NX76	CKLF-like MARVEL transmembrane domain-containing protein 6	CMTM6	0.109185	0.152102
Q9NZB2;A0A0C4DG79;A0A0C4DH52	Constitutive coactivator of PPAR-gamma-like protein 1	FAM120A	0.236554	0.898838
Q9ULX6	A-kinase anchor protein 8-like	AKAP8L	0.244148	0.852054
Q9UQ35;I3L3Q8;I3L1I8;I3L182;I3L4D8	Serine/arginine repetitive matrix protein 2	SRRM2	0.279494	0.213504
Q9UQ80;F8VR77	Proliferation-associated protein 2G4	PA2G4	0.515245	0.483759
Q9Y3B9	RRP15-like protein	RRP15	0.807637	1.89854
Q9Y3D3	28S ribosomal protein S16, mitochondrial	MRPS16	0.0237632	-0.105022
Q9Y3F4	Serine-threonine kinase receptor-associated protein	STRAP	1.00578	-2.62628
Q9Y3I0	tRNA-splicing ligase RtcB homolog	RTCB	0.320522	-1.76694
Q9Y5B9	FACT complex subunit SPT16	SUPT16H	0.360416	0.301938
